# Supplementary material for: Combination of gold and redox enzyme catalysis to access valuable enantioenriched aliphatic β-chlorohydrins
Source: Royal Society of Chemistry journal article supplement (doi:10.1039/d2ob01953a), 2022-01-01
Supplement: d2ob01953a1.pdf [file d2ob01953a1.pdf]

# Combination of gold and redox enzyme catalysis to access valuable enantioenriched aliphatic $\beta$ -chlorohydrins

## Electronic Supporting Information

Lorena Escot, Sergio González-Granda, Vicente Gotor-Fernández\* and  
Iván Lavandera\*

Organic and Inorganic Chemistry Department. University of Oviedo.  
Avenida Julián Clavería 8, 33006 Oviedo, Spain. Phone number: +34985103454  
(V.G.-F.); +34985103452 (I.L.); fax number: +34985103446.

E-mail: vicgotfer@uniovi.es (V.G.-F.); lavanderaivan@uniovi.es (I.L.).

### Index (Page 1 out of 120)

|                                                                                                                                                           |            |
|-----------------------------------------------------------------------------------------------------------------------------------------------------------|------------|
| <b>I. Compounds described in this contribution</b> .....                                                                                                  | <b>S3</b>  |
| <b>II. General protocol for the synthesis of alkynes 1a-i and kinetic resolution<br/>of oct-1-yn-3-ol</b> .....                                           | <b>S4</b>  |
| <i>II.1. Synthesis of alkynes 1a and 1b</i> .....                                                                                                         | <b>S4</b>  |
| <i>II.2. Synthesis of alkyne 1c</i> .....                                                                                                                 | <b>S5</b>  |
| <i>II.3. Synthesis of alkynes 1d and 1h</i> .....                                                                                                         | <b>S6</b>  |
| <i>II.4. Synthesis of alkyne 1e</i> .....                                                                                                                 | <b>S7</b>  |
| <i>II.5. Synthesis of alkyne 1f</i> .....                                                                                                                 | <b>S8</b>  |
| <i>II.6. Synthesis of alkyne 1g</i> .....                                                                                                                 | <b>S9</b>  |
| <i>II.7. Synthesis of alkyne 1i</i> .....                                                                                                                 | <b>S11</b> |
| <i>II.8. Kinetic resolution of oct-1-yn-3-ol</i> .....                                                                                                    | <b>S12</b> |
| <b>III. Optimization of the gold(I)-catalyzed hydration process of alkyne 1a</b> .....                                                                    | <b>S14</b> |
| <b>IV. Full characterization of <math>\alpha</math>-halomethyl ketones 2 obtained through<br/>gold(I)-catalyzed hydration</b> .....                       | <b>S16</b> |
| <b>V. Full characterization of <math>\beta</math>-chlorohydrins 3 obtained after chemical<br/>reduction of <math>\alpha</math>-chloro ketones 2</b> ..... | <b>S18</b> |
| <b>VI. Experimental protocols and screening results for the reduction of<br/><math>\alpha</math>-chloromethyl ketones using different ADHs</b> .....      | <b>S20</b> |
| <i>VI.1. Bioreduction of 2a using ADH-A</i> .....                                                                                                         | <b>S20</b> |
| <i>VI.2. Bioreduction of 2a using ADH-T, TeSADH and SyADH</i> .....                                                                                       | <b>S20</b> |
| <i>VI.3. Bioreduction of 2a using LbADH</i> .....                                                                                                         | <b>S20</b> |

|                                                                                                                                         |     |
|-----------------------------------------------------------------------------------------------------------------------------------------|-----|
| <i>VI.4. Bioreduction of 2a using commercial evo.1.1.200</i> .....                                                                      | S21 |
| <i>VI.5. Bioreduction of 2a using commercial ADHs from Codexis</i> .....                                                                | S21 |
| <i>VI.6. Summary of results in the bioreduction of ketone 2a</i> .....                                                                  | S22 |
| <i>VI.7. Summary of results in the bioreduction of ketone 2c</i> .....                                                                  | S23 |
| <i>VI.8. Summary of results in the bioreduction of ketone 2d</i> .....                                                                  | S24 |
| <i>VI.9. Summary of results in the bioreduction of ketone 2e</i> .....                                                                  | S25 |
| <i>VI.10. Summary of results in the bioreduction of ketone 2f</i> .....                                                                 | S26 |
| <i>VI.11. Summary of results in the bioreduction of ketone 2g</i> .....                                                                 | S27 |
| <i>VI.12. Summary of results in the bioreduction of ketone 2h</i> .....                                                                 | S28 |
| <i>VI.13. Summary of results in the bioreduction of racemic and optically active ketone 2i</i> .....                                    | S30 |
| <b>VII. Optimization of the one-pot hydration-bioreduction cascade starting from alkyne 1a</b> .....                                    | S32 |
| <b>VIII. Scope of the one-pot cascade process</b> .....                                                                                 | S34 |
| <b>IX. Scale-up of the one-pot cascade hydration-bioreduction processes</b> .....                                                       | S36 |
| <b>X. Analytical data</b> .....                                                                                                         | S37 |
| <i>X.1. GC analyses for the determination of product percentages</i> .....                                                              | S37 |
| <i>X.2. GC analyses for the determination of ee values of 1i, 2i and 3a-c,e,h,i</i> .....                                               | S38 |
| <i>X.3. HPLC analyses for the determination of product percentages and enantiomeric excess values in reactions towards 3d,f,g</i> ..... | S48 |
| <b>XI. Optical rotation values of derivatives 3a-i obtained through the concurrent cascade approach</b> .....                           | S52 |
| <b>XII. Synthesis and characterization of epoxide 6i to determine the absolute configuration of compound 3i</b> .....                   | S53 |
| <b>XIII. Reference section</b> .....                                                                                                    | S54 |
| <b>XIV. NMR spectra</b> .....                                                                                                           | S56 |

## I. Compounds described in this contribution

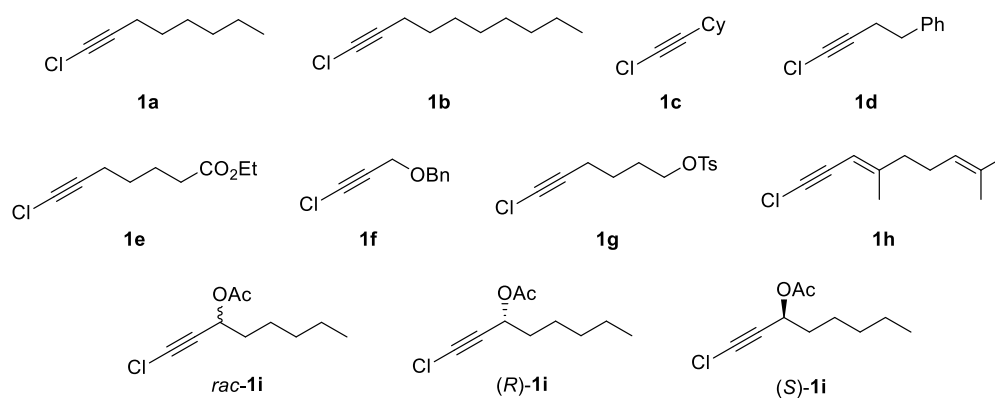

**Figure S1.** Structure of chloroalkynes **1a-i** studied in this contribution.

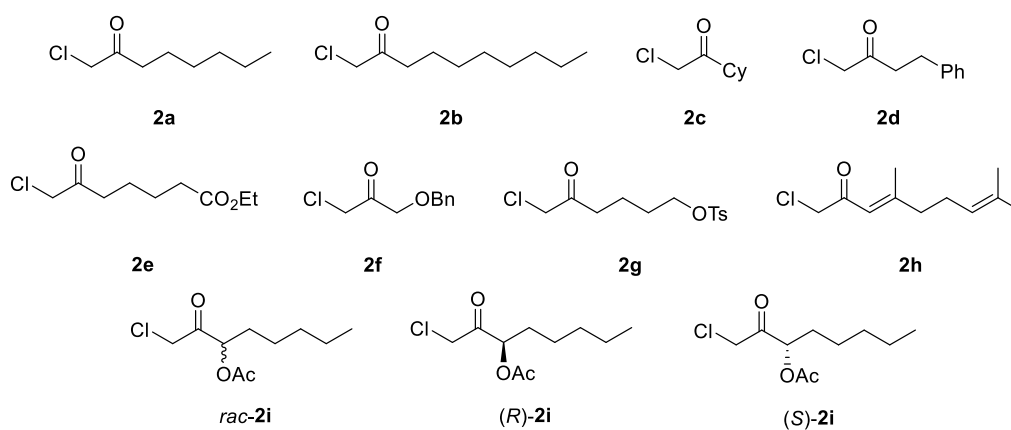

**Figure S2.** Structure of prochiral  $\alpha$ -chloromethyl ketones **2a-i** studied in this contribution.

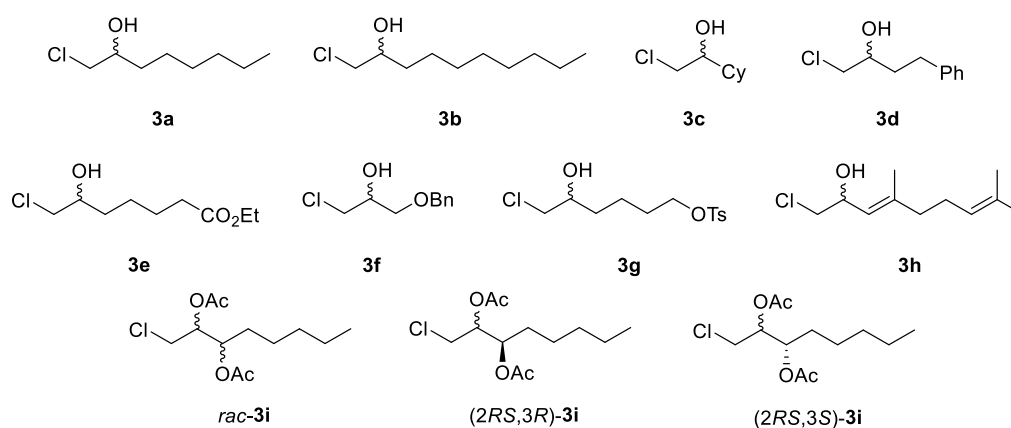

**Figure S3.** Structure of chlorohydrins **3a-h** and diester **3i** studied in this contribution.

## II. General protocol for the synthesis of alkynes **1a-i** and kinetic resolution of oct-1-yn-3-ol

### II.1. Synthesis of alkynes **1a** and **1b**

Compounds **1a** and **1b** were synthesized following an adapted procedure to the one described by Nicolai *et al* (Scheme S1).<sup>1</sup>

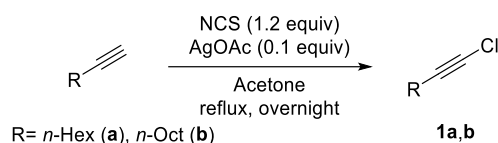

**Scheme S1.** Synthesis of chlorinated alkynes **1a** and **1b** from the corresponding terminal alkynes.

*N*-chlorosuccinimide (NCS, 3.2 g, 24 mmol, 1.20 equiv) and silver acetate (AgOAc, 333.9 mg, 2.4 mmol, 0.10 equiv) were added in this order to a solution of the corresponding acetylene (20 mmol, 1.0 equiv) in acetone (80 mL), and the solution was refluxed overnight. After this time, the mixture was poured into ice, and the resulting aqueous layer extracted with pentane (3 × 20 mL). The combined organic layers were washed with brine (25 mL), dried over Na<sub>2</sub>SO<sub>4</sub>, filtered, and the solvent evaporated under reduced pressure. Purification by column chromatography (SiO<sub>2</sub>, pentane) afforded the corresponding chlorinated alkyne **1a** or **1b** as smelly colorless oils (2.57 g and 3.21 g, 89% and 93% isolated yield, respectively). The spectroscopic data of compounds **1a** and **1b** matched with the ones previously reported in the literature.<sup>1</sup>

**1-Chlorooct-1-yne (1a):** Colorless oil. *R*<sub>f</sub> (pentane): 0.80. IR:  $\nu$  2956, 2930, 2859, 2244, 1467, 1379, 1084, 726 cm<sup>-1</sup>. <sup>1</sup>H-NMR (300.13 MHz, CDCl<sub>3</sub>):  $\delta$  2.19 (*t*, *J* = 7.0 Hz, 2H), 1.57–1.47 (*m*, 2H), 1.44–1.26 (*m*, 6H), 0.91 (*m*, 3H). <sup>13</sup>C-NMR (75.5 MHz, CDCl<sub>3</sub>):  $\delta$  69.8 (C), 56.9 (C), 31.3 (CH<sub>2</sub>), 28.5 (CH<sub>2</sub>), 28.3 (CH<sub>2</sub>), 22.5 (CH<sub>2</sub>), 18.8 (CH<sub>2</sub>), 14.0 (CH<sub>3</sub>).

**1-Chlorodec-1-yne (1b):** Colorless oil.  $R_f$  (10% Et<sub>2</sub>O/pentane): 0.85. IR:  $\nu$  2958, 2925, 2855, 2317, 1468, 1083, 724 cm<sup>-1</sup>. <sup>1</sup>H-NMR (300.13 MHz, CDCl<sub>3</sub>):  $\delta$  2.18 (*t*,  $J = 7.0$  Hz, 2H), 1.51 (*quint*,  $J = 7.1$  Hz, 2H), 1.42–1.29 (*m*, 10H), 0.90 (*t*,  $J = 6.6$  Hz, 3H). <sup>13</sup>C-NMR (75.5 MHz, CDCl<sub>3</sub>):  $\delta$  69.7 (C), 56.9 (C), 31.8 (CH<sub>2</sub>), 29.2 (CH<sub>2</sub>), 29.1 (CH<sub>2</sub>), 28.8 (CH<sub>2</sub>), 28.4 (CH<sub>2</sub>), 22.7 (CH<sub>2</sub>), 18.9 (CH<sub>2</sub>), 14.1 (CH<sub>3</sub>).

## II.2. Synthesis of alkyne 1c

Compound **1c** was synthesized following an adapted procedure to the one described by Bai *et al* (Scheme S2).<sup>2</sup>

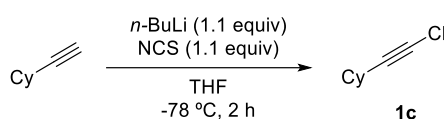

**Scheme S2.** Synthesis of chlorinated alkyne **1c**.

*N*-butyllithium (2.4 M solution in hexanes, 4.6 mL, 11 mmol, 1.1 equiv) was added to a solution of ethynylcyclohexane (1.3 mL, 10 mmol, 1.0 equiv) in THF (30 mL) under nitrogen atmosphere, and the mixture was stirred for 15 min at  $-78$  °C before the addition of *N*-chlorosuccinimide (NCS, 1.49 g, 11 mmol, 1.1 equiv). The reaction was then allowed to gradually warm to room temperature and subsequently quenched with an aqueous saturated NH<sub>4</sub>Cl solution (15 mL). The aqueous layer was extracted with Et<sub>2</sub>O (3 x 30 mL), and the combined organic layers were dried over Na<sub>2</sub>SO<sub>4</sub>, filtered and concentrated in vacuum. Purification by column chromatography (SiO<sub>2</sub>, pentane) afforded the corresponding chlorinated alkyne **1c** as a smelly colorless oil (1.23 g, 86% of isolated yield).

**(Chloroethynyl)cyclohexane (1c):** Colorless oil.  $R_f$  (pentane): 0.80. IR:  $\nu$  3005, 2990, 2929, 2855, 2319, 1462, 1275, 1267, 1261, 1049, 742 cm<sup>-1</sup>. <sup>1</sup>H-NMR (300.13 MHz, CDCl<sub>3</sub>):  $\delta$  2.44 (*apparent td*,  $J = 9.0, 4.5$  Hz, 1H), 1.84–1.67 (*m*, 4H), 1.53–1.28 (*m*, 6H). <sup>13</sup>C-NMR (75.5 MHz, CDCl<sub>3</sub>):  $\delta$  81.9 (C), 65.1 (C), 32.3 (2CH<sub>2</sub>), 29.5 (CH<sub>2</sub>), 25.8 (CH), 24.8 (2CH<sub>2</sub>).

### II.3. Synthesis of alkynes **1d** and **1h**

Alkynes **1d** and **1h** were synthesized through a Corey-Fuchs reaction.<sup>3</sup> In the case of alkyne **1h**, the development of a previous Swern oxidation to obtain an aldehyde was performed by adapting the protocol previously described by Marx and Tidwell (Scheme S3).<sup>4</sup>

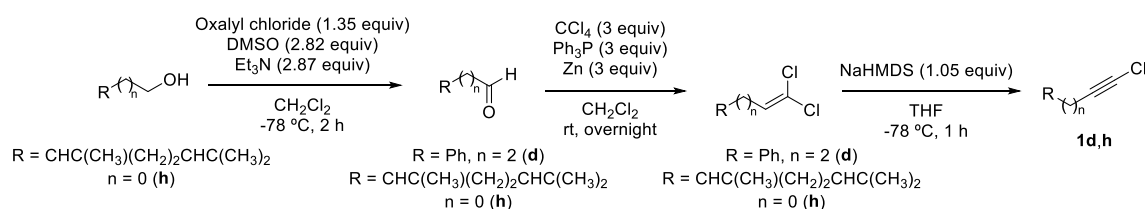

Oxalyl chloride (1.5 mL, 17.5 mmol, 1.35 equiv) and dimethylsulfoxide (DMSO, 2.6 mL, 36.6 mmol, 2.82 equiv) were diluted with CH<sub>2</sub>Cl<sub>2</sub> (25 mL) under nitrogen atmosphere and the mixture was stirred at -78 °C. After 15 min, (*E*)-3,7-dimethylocta-2,6-dien-1-ol (2.3 mL, 12.97 mmol, 1.0 equiv) was added and stirred for further 30 min. Then, Et<sub>3</sub>N (5.2 mL, 37.2 mmol, 2.87 equiv) was added. The reaction was then allowed to gradually warm to room temperature, quenched with H<sub>2</sub>O (25 mL), and the aqueous layer was extracted with CH<sub>2</sub>Cl<sub>2</sub> (3 x 30 mL). The combined organic layers were washed with an aqueous saturated NaHCO<sub>3</sub> solution (30 mL) and then, dried over Na<sub>2</sub>SO<sub>4</sub>, filtered and concentrated in vacuum.

In the second step, carbon tetrachloride (CCl<sub>4</sub>, 5.7 mL, 60 mmol, 3.0 equiv), triphenylphosphine (Ph<sub>3</sub>P, 15.8 g, 60 mmol, 3.0 equiv) and Zn (3.9 g, 60 mmol, 3.0 equiv) were stirred in CH<sub>2</sub>Cl<sub>2</sub> (100 mL) for 15 min at rt under nitrogen atmosphere. After that, the corresponding aldehyde was added dropwise. After 16 h, the black solution was concentrated in the rotary evaporator until approx. 50 mL of mixture remained. The residue was then purified via flash chromatography on silica gel (100% hexane) to obtain the desired 2,2-dichlorovinylated derivatives as yellow oils.

Subsequently, a 1 M solution of NaHMDS in THF (10.05 mL, 10.05 mmol, 1.05 equiv) was added dropwise at -78 °C to a stirred solution of the corresponding 2,2-dichlorovinylated derivative (10 mmol) in THF (25 mL). After 1 h, the reaction was

warmed to 0 °C, quenched with an aqueous saturated NH<sub>4</sub>Cl solution (20 mL) and diluted with H<sub>2</sub>O (25 mL). Then, the solution was extracted with Et<sub>2</sub>O (3 x 20 mL), washed with brine (2 x 20 mL), and the combined organic extracts dried over Na<sub>2</sub>SO<sub>4</sub>, filtered, and the solvent removed by evaporation under reduced pressure. Compounds **1d** and **1h** were isolated by column chromatography (SiO<sub>2</sub>, 100% hexane) to obtain the desired chlorinated alkynes **1d** and **1h** (1.19 g and 1.10 g, 72 and 60% isolated yield, respectively). The spectroscopic data of compound **1d** matched with the ones already reported in the literature.<sup>5</sup>

**(4-Chlorobut-3-yn-1-yl)benzene (1d)**: Colorless oil. *R<sub>f</sub>* (hexane): 0.49. IR:  $\nu$  3028, 2928, 2859, 1604, 1454, 1076, 744, 696 cm<sup>-1</sup>. <sup>1</sup>H-NMR (300.13 MHz, CDCl<sub>3</sub>):  $\delta$  7.36–7.22 (*m*, 5H), 2.85 (*t*, *J* = 7.6 Hz, 2H), 2.49 (*t*, *J* = 7.5 Hz, 2H). <sup>13</sup>C-NMR (75.5 MHz, CDCl<sub>3</sub>):  $\delta$  140.7 (C), 128.9 (2CH), 128.8 (2CH), 126.8 (CH), 69.4 (C), 58.4 (C), 35.2 (CH<sub>2</sub>), 21.4 (CH<sub>2</sub>).

**(E)-1-Chloro-4,8-dimethylnona-3,7-dien-1-yne (1h)**: Colorless oil. *R<sub>f</sub>* (pentane): 0.83. IR:  $\nu$  2966, 2913, 1625, 1439, 1376, 1273, 829, 754, 419 cm<sup>-1</sup>. <sup>1</sup>H-NMR (300.13 MHz, CDCl<sub>3</sub>):  $\delta$  5.22 (*m*, 1H), 5.08 (*m*, 1H), 2.12 (*m*, 4H), 1.90 (*s*, 3H), 1.70 (*s*, 3H), 1.62 (*s*, 3H). <sup>13</sup>C-NMR (75.5 MHz, CDCl<sub>3</sub>):  $\delta$  154.4 (C), 132.7 (C), 123.7 (CH), 104.0 (CH), 69.5 (C), 68.1 (C), 39.0 (CH<sub>2</sub>), 26.5 (CH<sub>2</sub>), 26.1 (CH<sub>3</sub>), 19.8 (CH<sub>3</sub>), 18.1 (CH<sub>3</sub>).

#### II.4. Synthesis of alkyne **1e**

Compound **1e** was synthesized through esterification of hept-6-ynoic acid with ethanol and chemical chlorination of the resulting ethyl hept-6-ynoate. Both steps were performed following an adapted procedure to the one described by Nicolai *et al* (Scheme S4).<sup>1</sup>

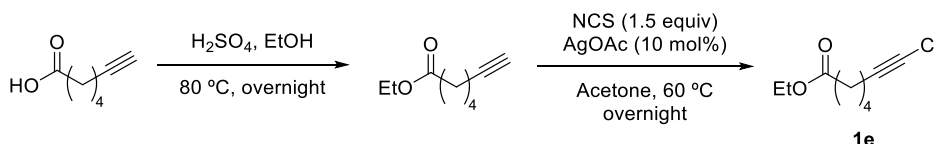

**Scheme S4.** Synthesis of chlorinated alkyne **1e**.

Hept-6-ynoic acid (1 g, 7.9 mmol), a concentrated H<sub>2</sub>SO<sub>4</sub> aqueous solution (0.88 mL) and ethanol (EtOH, 7.1 mL) were stirred at 80 °C overnight. After that, the reaction was cooled at rt and quenched with H<sub>2</sub>O (5 mL). The solution was extracted with Et<sub>2</sub>O (3 x

15 mL) and the combined organic extracts dried over Na<sub>2</sub>SO<sub>4</sub>, filtered, and the solvent removed by evaporation under reduced pressure, yielding ethyl hept-6-ynoate that was used without further purification for the next step.

Then, NCS (1.58 g, 11.85 mmol, 1.50 equiv) and AgOAc (132 mg, 0.79 mmol, 0.10 equiv) were added in this order to the previous obtained ester (7.9 mmol, 1.0 equiv) in acetone (25 mL), and the solution was refluxed overnight. After this time, the mixture was poured into ice, and the resulting aqueous layer extracted with pentane (3 × 20 mL). The combined organic layers were washed with brine (25 mL), dried over Na<sub>2</sub>SO<sub>4</sub>, filtered, and the solvent evaporated under reduced pressure. Purification by column chromatography (SiO<sub>2</sub>, 10% Et<sub>2</sub>O/pentane) afforded the corresponding chlorinated alkyne **1e** as a smelly colorless oil (1.00 g, 67% isolated yield).

**Ethyl 7-chlorohept-6-ynoate (1e):** Colorless oil. *R*<sub>f</sub> (10% Et<sub>2</sub>O/pentane): 0.55. IR:  $\nu$  2938, 2239, 1732, 1298, 1273, 1178, 1028, 756, 747 cm<sup>-1</sup>. <sup>1</sup>H-NMR (300.13 MHz, CDCl<sub>3</sub>):  $\delta$  4.14 (*qt*, *J* = 7.1, 1.3 Hz, 2H), 2.32 (*td*, *J* = 7.4, 1.7 Hz, 2H), 2.21 (*td*, *J* = 7.0, 1.6 Hz, 2H), 1.78–1.67 (*m*, 2H), 1.60–1.49 (*m*, 2H), 1.27 (*tt*, *J* = 7.1, 1.3 Hz, 3H). <sup>13</sup>C-NMR (75.5 MHz, CDCl<sub>3</sub>):  $\delta$  173.9 (C), 69.5 (C), 60.8 (CH<sub>2</sub>), 57.9 (C), 34.2 (CH<sub>2</sub>), 28.1 (CH<sub>2</sub>), 24.4 (CH<sub>2</sub>), 18.9 (CH<sub>2</sub>), 14.7 (CH<sub>3</sub>). HRMS (ESI<sup>+</sup>, *m/z*): calcd for (C<sub>9</sub>H<sub>14</sub>ClO<sub>2</sub>)<sup>+</sup> (*M*+*H*)<sup>+</sup>: 189.0677; found 189.0682.

## II.5. Synthesis of alkyne **1f**

Compound **1f** was synthesized by first protecting the alcohol function with a benzyl group and subsequent chlorination of the terminal alkyne (Scheme S5).

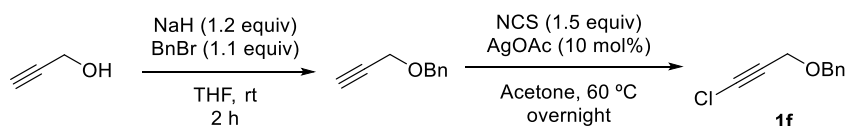

**Scheme S5.** Synthesis of chlorinated alkyne **1f**.

A solution of prop-2-yn-1-ol (883  $\mu$ L, 15 mmol, 1.0 equiv) in THF (30 mL) was added dropwise to a solution of NaH (720 mg, 18 mmol, 1.2 equiv) in THF (15 mL), and the resulting mixture was stirred 30 min at 0 °C under nitrogen atmosphere. After that, benzyl bromide (1.95 mL, 16.5 mmol, 1.1 equiv) was added and the reaction was then allowed



to gradually warm to room temperature and stirred 2 h at rt. After this time, the reaction was quenched with an aqueous saturated  $\text{NH}_4\text{Cl}$  solution (25 mL), and the aqueous layer was extracted with EtOAc (3 x 30 mL). The combined organic layers were dried over  $\text{Na}_2\text{SO}_4$ , filtered and concentrated in vacuum. Purification by column chromatography ( $\text{SiO}_2$ , 5% EtOAc/hexane) afforded the corresponding benzylated alkyne.

Then, NCS (2.85 g, 21.38 mmol, 1.5 equiv) and AgOAc (357 mg, 2.14 mmol, 0.1 equiv) were added in this order to the previous obtained benzylated alkyne (14.25 mmol, 1.0 equiv) in acetone (40 mL), and the solution was refluxed overnight. After this time, the mixture was poured into ice, and the resulting aqueous layer extracted with pentane (3 x 40 mL). The combined organic layers were washed with brine (40 mL), dried over  $\text{Na}_2\text{SO}_4$ , filtered, and the solvent evaporated under reduced pressure. Purification by column chromatography ( $\text{SiO}_2$ , 5% EtOAc/hexane) afforded the corresponding chlorinated alkyne **1f** as a smelly colorless oil (2.12 g, 77% isolated yield). The spectroscopic data of compound **1f** matched with the ones already reported in the literature.<sup>6</sup>

**[(3-Chloroprop-2-yn-1-yl)oxy]methyl}benzene (1f):** Colorless oil.  $R_f$  (5% EtOAc/hexane): 0.68. IR:  $\nu$  3005, 2990, 2858, 1275, 1267, 1261, 1089, 748, 696  $\text{cm}^{-1}$ .  $^1\text{H-NMR}$  (300.13 MHz,  $\text{CDCl}_3$ ):  $\delta$  7.43–7.31 (*m*, 5H), 4.62 (*s*, 2H), 4.21 (*s*, 2H).  $^{13}\text{C-NMR}$  (75.5 MHz,  $\text{CDCl}_3$ ):  $\delta$  137.6 (C), 128.9 (2CH), 128.5 (2CH), 128.4 (CH), 72.1 ( $\text{CH}_2$ ), 65.8 (C), 65.1 (C), 57.9 ( $\text{CH}_2$ ). HRMS (ESI<sup>+</sup>, *m/z*): calcd for  $(\text{C}_{10}\text{H}_{10}\text{ClO})^+$  (*M+H*)<sup>+</sup>: 181.0415; found 181.0420.

## II.6. Synthesis of alkyne 1g

Compound **1g** was synthesized by first protecting the alcohol moiety with a tosyl group and next via chemical chlorination of the terminal alkyne (Scheme S6).

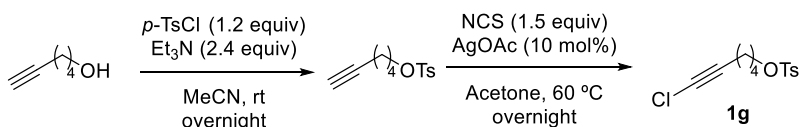

**Scheme S6.** Synthesis of chlorinated alkyne **1g**.

Hex-5-yn-1-ol (1.00 g, 10.2 mmol, 1.0 equiv), *p*-toluensulfonyl chloride (2.33 g, 12.24 mmol, 1.2 equiv) and Et<sub>3</sub>N (3.40 mL, 24.5 mmol, 2.4 equiv) were dissolved in dry MeCN (50 mL) and stirred overnight at rt under nitrogen atmosphere. After this time, the reaction was quenched with H<sub>2</sub>O (25 mL), and the aqueous layer was extracted with EtOAc (3 x 30 mL). The combined organic layers were dried over Na<sub>2</sub>SO<sub>4</sub>, filtered and concentrated in vacuum. Purification by column chromatography (SiO<sub>2</sub>, 30% EtOAc/hexane) afforded the corresponding tosylated derivative. The spectroscopic data of the compound matched with the ones already reported in the literature.<sup>7</sup>

Then, NCS (1.30 g, 9.77 mmol, 1.5 equiv) and AgOAc (108.5 mg, 0.65 mmol, 0.1 equiv) were added in this order to a solution of the obtained hex-5-yn-1-yl 5-methylbenzenesulfonate (6.51 mmol, 1.0 equiv) in acetone (25 mL). The solution was refluxed overnight, and then the mixture was poured into ice, extracting the resulting aqueous layer with pentane (3 x 20 mL). The combined organic layers were washed with brine (25 mL), dried over Na<sub>2</sub>SO<sub>4</sub>, filtered, and the solvent evaporated under reduced pressure. Purification by column chromatography (SiO<sub>2</sub>, 50% EtOAc/hexane) afforded the corresponding chlorinated alkyne **1g** as a smelly colorless oil (1.68 g, 74% isolated yield).

**6-Chlorohex-5-yn-1-yl 4-methylbenzenesulfonate (1g):** Colorless oil. *R<sub>f</sub>* (50% EtOAc/hexane): 0.89. IR:  $\nu$  2954, 2925, 1598, 1357, 1175, 1097, 933, 816, 666, 556 cm<sup>-1</sup>. <sup>1</sup>H-NMR (300.13 MHz, CDCl<sub>3</sub>):  $\delta$  7.81 (*d*, *J* = 8.3 Hz, 2H), 7.37 (*d*, *J* = 7.9 Hz, 2H), 4.06 (*t*, *J* = 6.3 Hz, 2H), 2.47 (*s*, 3H), 2.17 (*t*, *J* = 6.9 Hz, 2H), 1.76 (*dq*, *J* = 8.0, 6.0 Hz, 2H), 1.55 (*quint*, *J* = 7.0 Hz, 2H). <sup>13</sup>C-NMR (75.5 MHz, CDCl<sub>3</sub>):  $\delta$  144.8 (C), 133.1 (C), 129.9 (2CH), 127.9 (2CH), 69.8 (C+CH<sub>2</sub>), 68.6 (C), 27.8 (CH<sub>2</sub>), 24.2 (CH<sub>2</sub>), 21.6 (CH<sub>3</sub>), 18.1 (CH<sub>2</sub>). HRMS (ESI<sup>+</sup>, *m/z*): calcd for (C<sub>13</sub>H<sub>15</sub>ClNaO<sub>3</sub>S)<sup>+</sup> (M+Na)<sup>+</sup>: 309.0323; found 309.0332.

## II.7. Synthesis of alkyne **1i**

Compound **1i** was synthesized by first protecting the alcohol moiety with an acetyl group and next via chemical chlorination of the terminal alkyne (Scheme S7).

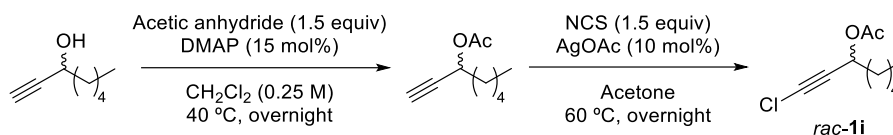

**Scheme S7.** Synthesis of racemic chlorinated alkyne **1i**.

Oct-1-yn-3-ol (2.00 g, 15.85 mmol, 1.0 equiv), acetic anhydride (2.25 mL, 23.78 mmol, 1.5 equiv) and DMAP (284 mg, 2.39 mmol, 0.15 equiv) were dissolved in CH<sub>2</sub>Cl<sub>2</sub> (65 mL), and stirred overnight at 40 °C. After this time, the reaction was quenched with H<sub>2</sub>O (25 mL), and the aqueous layer was extracted with CH<sub>2</sub>Cl<sub>2</sub> (3 x 30 mL). The combined organic layers were dried over Na<sub>2</sub>SO<sub>4</sub>, filtered and concentrated in vacuum, affording the corresponding acetate intermediate.

Then, NCS (1.19 g, 8.92 mmol, 1.5 equiv) and AgOAc (99 mg, 0.59 mmol, 0.1 equiv) were added in this order to a solution of the so-obtained oct-1-yn-3-yl acetate (5.94 mmol, 1.0 equiv) in acetone (25 mL). The solution was refluxed overnight, and after this time, the mixture was poured into ice, and the resulting aqueous layer extracted with Et<sub>2</sub>O (3 x 20 mL). The combined organic layers were washed with brine (25 mL), dried over Na<sub>2</sub>SO<sub>4</sub>, filtered, and the solvent evaporated under reduced pressure. Purification by column chromatography (SiO<sub>2</sub>, 10% Et<sub>2</sub>O/pentane) afforded the corresponding chlorinated alkyne **1i** as a smelly colorless oil (1.16 g, 48% isolated yield).

**1-Chlorooct-1-yn-3-yl acetate (1i):** Colorless oil. *R<sub>f</sub>* (50% Et<sub>2</sub>O/pentane): 0.81. IR:  $\nu$  3045, 2929, 2861, 2244, 1740, 1369, 1273, 1257, 1219, 1017, 765, 749 cm<sup>-1</sup>. <sup>1</sup>H-NMR (300.13 MHz, CDCl<sub>3</sub>):  $\delta$  5.33 (*t*, *J* = 6.7 Hz, 1H), 2.09 (*s*, 3H), 1.79–1.70 (*m*, 2H), 1.47–1.26 (*m*, 6H), 0.90 (*t*, *J* = 6.8 Hz, 3H). <sup>13</sup>C-NMR (75.5 MHz, CDCl<sub>3</sub>):  $\delta$  170.4 (C), 67.3 (C), 64.6 (CH), 64.4 (C), 35.0 (CH<sub>2</sub>), 31.6 (CH<sub>2</sub>), 25.0 (CH<sub>2</sub>), 22.9 (CH<sub>2</sub>), 21.4 (CH<sub>3</sub>), 14.4 (CH<sub>3</sub>). HRMS (ESI<sup>+</sup>, *m/z*): calcd for (C<sub>10</sub>H<sub>16</sub>ClO<sub>2</sub>)<sup>+</sup> (*M*+H)<sup>+</sup>: 203.0833; found 203.0843.

## II.8. Kinetic resolution of oct-1-yn-3-ol

Both acetylated **1i** enantiomers were obtained through lipase-catalyzed kinetic resolution of oct-1-yn-3-ol following an adapted procedure to the one described by Zhu *et al* (Scheme S8).<sup>8</sup>

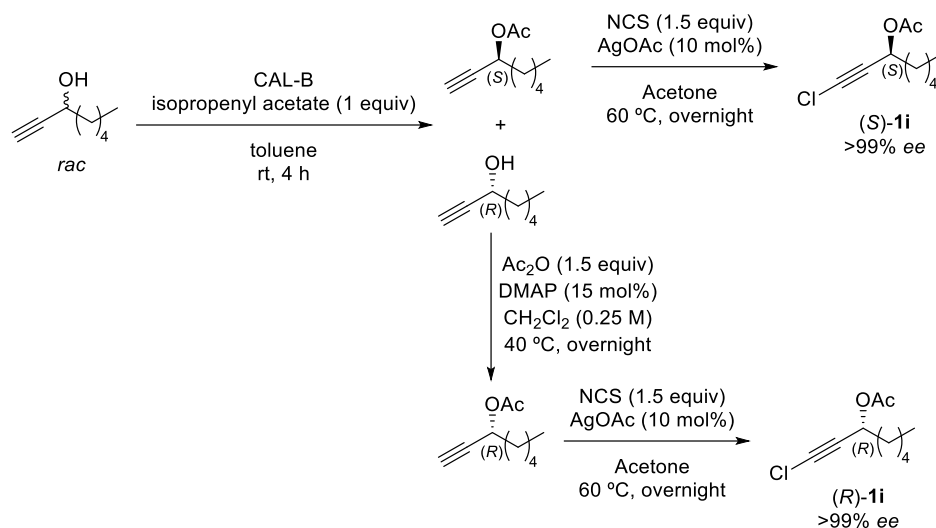

**Scheme S8.** Kinetic resolution of oct-1-yn-3-ol and synthesis of chlorinated alkynes (S)- and (R)-**1i**.

A suspension of racemic oct-1-yn-3-ol (2.24 g, 16 mmol, 1.0 equiv), isopropenyl acetate (1.76 mL, 16 mmol, 1.0 equiv) and immobilized CAL-B (Novozyme 435<sup>®</sup>, 320 mg) in toluene (80 mL) was stirred at rt for 4 h. After this time, the suspension was filtered off, washed (10 mL), and the solvent evaporated under reduced pressure. Purification by column chromatography (SiO<sub>2</sub>, 30% Et<sub>2</sub>O/hexane) afforded the corresponding optically active (R)-alcohol (987 mg, 44% isolated yield) and (S)-acetate (1.37 g, 47% isolated yield) both in enantiopure form (see Section X for analytical details).

On one hand, the enantiopure (S)-acetate was subjected to a chlorination reaction following the usual procedure: NCS (1.50 g, 11.25 mmol, 1.5 equiv) and AgOAc (125 mg, 0.75 mmol, 0.1 equiv) were added in this order to a solution of (S)-oct-1-yn-3-yl acetate (1.37 g, 7.5 mmol, 1.0 equiv) in acetone (30 mL). The solution was refluxed overnight, and after this time, the mixture was poured into ice, and the resulting aqueous layer extracted with Et<sub>2</sub>O (3 × 20 mL). The combined organic layers were washed with brine (25 mL), dried over Na<sub>2</sub>SO<sub>4</sub>, filtered, and the solvent evaporated under reduced

pressure. Purification by column chromatography (SiO<sub>2</sub>, 30% Et<sub>2</sub>O/hexane) afforded the corresponding chlorinated alkyne (*S*)-**1i** (>99% *ee*) as a smelly colorless oil (1.10 g, 32% isolated yield).

On the other hand, the unreacted (*R*)-alcohol from the lipase-catalyzed kinetic resolution was chemically acetylated. Therefore, (*R*)-oct-1-yn-3-ol (987 mg, 7.78 mmol, 1.0 equiv), acetic anhydride (1.12 mL, 11.67 mmol, 1.5 equiv) and DMAP (146 mg, 1.17 mmol, 0.15 equiv) were dissolved in CH<sub>2</sub>Cl<sub>2</sub> (25 mL), and stirred overnight at 40 °C. After this time, the reaction was quenched with H<sub>2</sub>O (25 mL), and the aqueous layer was extracted with CH<sub>2</sub>Cl<sub>2</sub> (3 x 30 mL). The combined organic layers were dried over Na<sub>2</sub>SO<sub>4</sub>, filtered and concentrated in vacuum. The resulting crude without further purification was subjected to the chlorination reaction. Thus, NCS (1.56 g, 11.67 mmol, 1.5 equiv) and AgOAc (130 mg, 0.78 mmol, 0.1 equiv) were added in this order to a solution of the so-obtained (*R*)-oct-1-yn-3-yl acetate (7.78 mmol, 1.0 equiv) in acetone (25 mL). The solution was refluxed overnight, and after this time, the mixture was poured into ice, and the resulting aqueous layer extracted with Et<sub>2</sub>O (3 × 25 mL). The combined organic layers were washed with brine (25 mL), dried over Na<sub>2</sub>SO<sub>4</sub>, filtered, and the solvent evaporated under reduced pressure. Purification by column chromatography (SiO<sub>2</sub>, 10% Et<sub>2</sub>O/pentane) afforded the corresponding chlorinated alkyne (*R*)-**1i** (>99 *ee*) as a smelly colorless oil (1.28 g, 37% isolated yield).

The spectroscopic data of optically active **1i** enantiomers matched with those reported for the racemic compound that have been previously displayed. For the optical rotation value, see Section XI.

The absolute configuration of both enantiomers was assigned based on the known stereopreference of the CAL-B.

### III. Optimization of the gold(I)-catalyzed hydration process of alkyne **1a**

**Table S1.** Screening of gold(I) catalysts in the hydration reaction of 1-chlorooct-1-yne (**1a**).

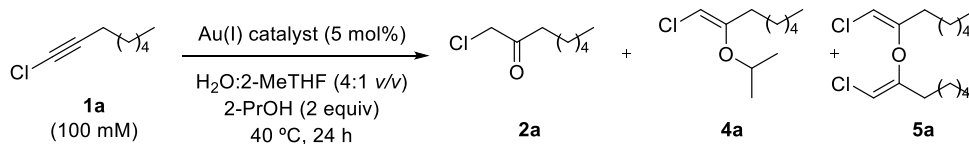

| Entry | Catalyst                         | <b>1a</b> (%) <sup>a</sup> | <b>2a</b> (%) <sup>a</sup> | By-products (%) <sup>a</sup> |
|-------|----------------------------------|----------------------------|----------------------------|------------------------------|
| 1     | --                               | >99                        | <1                         | <1                           |
| 2     | IPrAuNTf <sub>2</sub>            | <1                         | 99                         | 1                            |
| 3     | IPrAu(MeCN)SbF <sub>6</sub>      | 21                         | 68                         | 11                           |
| 4     | JohnPhosAu(MeCN)SbF <sub>6</sub> | 62                         | 37                         | 1                            |
| 5     | JohnPhosAuNTf <sub>2</sub>       | <1                         | 91                         | 9                            |
| 6     | BrettPhosAuNTf <sub>2</sub>      | <1                         | 96                         | 4                            |
| 7     | Ph <sub>3</sub> PAuCl            | 53                         | <1                         | 47                           |

<sup>a</sup> Product percentages were determined by GC analysis.

**1-Chlorooctan-2-one (2a):**<sup>9</sup> Yellowish oil (190 mg, 96%). *R<sub>f</sub>* (5% EtOAc/hexane): 0.60. IR:  $\nu$  1693 and 769 cm<sup>-1</sup>. <sup>1</sup>H-NMR (300.13 MHz, CDCl<sub>3</sub>):  $\delta$  4.07 (*s*, 2H), 2.58 (*t*, *J* = 7.4 Hz, 2H), 1.61 (*quint*, *J* = 7.3 Hz, 2H), 1.29 (*m*, 6H), 0.88 (*t*, *J* = 6.9 Hz, 3H). <sup>13</sup>C-NMR (75.5 MHz, CDCl<sub>3</sub>):  $\delta$  202.8 (C), 48.2 (CH<sub>2</sub>), 39.7 (CH<sub>2</sub>), 31.5 (CH<sub>2</sub>), 28.7 (CH<sub>2</sub>), 23.6 (CH<sub>2</sub>), 22.5 (CH<sub>2</sub>), 14.0 (CH<sub>3</sub>). HRMS (ESI<sup>+</sup>, *m/z*): calcd for (C<sub>8</sub>H<sub>16</sub>ClO)<sup>+</sup> (M+H)<sup>+</sup>: 163.0889; found 163.0883.

**(Z)-1-Chloro-2-[[*(Z)*-1-chlorooct-1-en-2-yl]oxy]oct-1-ene (5a):**<sup>9</sup> Yellowish oil. *R<sub>f</sub>* (hexane): 0.46. <sup>1</sup>H-NMR (300.13 MHz, CDCl<sub>3</sub>):  $\delta$  5.44 (*t*, *J* = 1.3 Hz, 2H), 2.12 (*m*, 4H), 1.56–1.48 (*m*, 4H), 1.30 (*m*, 12H), 0.89 (*m*, 6H). <sup>13</sup>C-NMR (75.5 MHz, CDCl<sub>3</sub>):  $\delta$  153.2 (2C), 100.1 (2CH), 32.3 (2CH<sub>2</sub>), 31.5 (2CH<sub>2</sub>), 28.7 (2CH<sub>2</sub>), 26.6 (2CH<sub>2</sub>), 22.5 (2CH<sub>2</sub>), 14.1 (2CH<sub>3</sub>). HRMS (ESI<sup>+</sup>, *m/z*): calcd for (C<sub>16</sub>H<sub>29</sub>Cl<sub>2</sub>O)<sup>+</sup> (M+H)<sup>+</sup>: 307.1590; found 307.1587.

**Table S2.** Screening of the reaction medium, temperature and equivalents of 2-PrOH in the hydration process of **1a** using IPrAuNTf<sub>2</sub> (5 mol%).

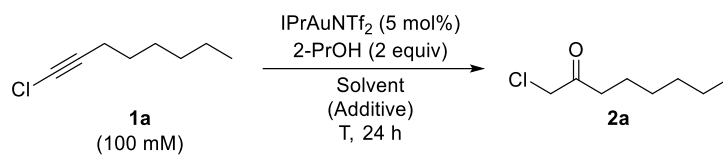

| Entry           | Reaction medium <sup>a</sup>                                       | T (°C) | <b>1a</b> (%) <sup>b</sup> | <b>2a</b> (%) <sup>b</sup> | By-products (%) <sup>b</sup> |
|-----------------|--------------------------------------------------------------------|--------|----------------------------|----------------------------|------------------------------|
| 1               | H <sub>2</sub> O:MeCN (4:1)                                        | 40     | 12                         | 67                         | 21                           |
| 2               | H <sub>2</sub> O:THF (4:1)                                         | 40     | <1                         | 72                         | 28                           |
| 3               | H <sub>2</sub> O:2-Me-THF (4:1)                                    | 40     | <1                         | 99                         | 1                            |
| 4               | H <sub>2</sub> O: <i>n</i> -Heptane (4:1)                          | 40     | 3                          | 78                         | 19                           |
| 5               | H <sub>2</sub> O:MTBE (4:1)                                        | 40     | <1                         | 63                         | 37                           |
| 6               | Buffer Tris-HCl pH 8.0 (20 mM):2-Me-THF (4:1)                      | 40     | <1                         | 85                         | 15                           |
| 7               | Buffer PO <sub>4</sub> <sup>3-</sup> pH 7.5 (50 mM):2-Me-THF (4:1) | 40     | 54                         | 34                         | 12                           |
| 8               | H <sub>2</sub> O:2-Me-THF (95:5)                                   | 40     | <1                         | 42                         | 58                           |
| 9               | H <sub>2</sub> O:2-Me-THF (9:1)                                    | 40     | <1                         | 48                         | 52                           |
| 10              | H <sub>2</sub> O:2-Me-THF (85:15)                                  | 40     | <1                         | 79                         | 21                           |
| 11              | H <sub>2</sub> O:2-Me-THF (4:1)                                    | 20     | <1                         | 88                         | 12                           |
| 12              | H <sub>2</sub> O:2-Me-THF (4:1)                                    | 30     | <1                         | 91                         | 9                            |
| 13              | H <sub>2</sub> O:2-Me-THF (4:1)                                    | 45     | <1                         | 84                         | 16                           |
| 14              | H <sub>2</sub> O:2-PrOH (4:1)                                      | 40     | <1                         | 35                         | 65                           |
| 15              | H <sub>2</sub> O                                                   | 40     | <1                         | 86                         | 14                           |
| 16              | TPGS-750-M <sup>c</sup>                                            | 40     | <1                         | 60                         | 40                           |
| 17              | H <sub>2</sub> O:DES <sup>d</sup> (4:1)                            | 40     | <1                         | 86                         | 14                           |
| 18 <sup>e</sup> | H <sub>2</sub> O:2-Me-THF (4:1)                                    | 40     | <1                         | 93                         | 7                            |
| 19 <sup>f</sup> | H <sub>2</sub> O:2-Me-THF (4:1)                                    | 40     | <1                         | 92                         | 8                            |

<sup>a</sup> Volume/volume ratios appear in parentheses unless otherwise stated.

<sup>b</sup> Product percentages were determined by GC analysis.

<sup>c</sup> This is a commercially available water solution that includes the surfactant in 2% w/v.

<sup>d</sup> Deep Eutectic Solvent formed by ChCl:Gly (1:2 mol/mol).

<sup>e</sup> [**1a**] = 150 mM.

<sup>f</sup> [**1a**] = 200 mM.

#### IV. Full characterization of $\alpha$ -halomethyl ketones **2** obtained through gold(I)-catalyzed hydration

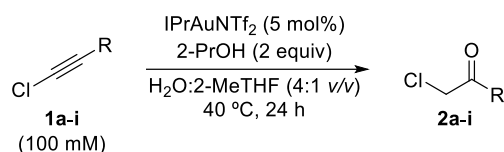

**1-Chlorooctan-2-one (2a):**<sup>9</sup> Yellowish oil (190 mg, 96%). See Section III for full compound characterization.

**1-Chlorodecan-2-one (2b):**<sup>10</sup> Yellowish oil (212 mg, 96%).  $R_f$  (10% EtOAc/hexane): 0.65. IR:  $\nu$  2924, 2855, 1733, 1719, 1459, 1401, 1378, 1131, 1069, 770, 759, 747, 725  $\text{cm}^{-1}$ .  $^1\text{H-NMR}$  (300.13 MHz,  $\text{CDCl}_3$ ):  $\delta$  4.09 (*s*, 2H), 2.60 (*t*,  $J = 7.4$  Hz, 2H), 1.63 (*m*, 2H), 1.34–1.27 (*m*, 10H), 0.90 (*t*,  $J = 6.7$  Hz, 3H).  $^{13}\text{C-NMR}$  (75.5 MHz,  $\text{CDCl}_3$ ):  $\delta$  202.8 (C), 48.2 ( $\text{CH}_2$ ), 39.7 ( $\text{CH}_2$ ), 31.8 ( $\text{CH}_2$ ), 29.3 ( $\text{CH}_2$ ), 29.1 (2 $\text{CH}_2$ ), 23.6 ( $\text{CH}_2$ ), 22.6 ( $\text{CH}_2$ ), 14.0 ( $\text{CH}_3$ ). HRMS (ESI<sup>+</sup>,  $m/z$ ): calcd for  $(\text{C}_{10}\text{H}_{19}\text{ClNaO})^+$  ( $\text{M}+\text{Na}$ )<sup>+</sup>: 213.1017; found 213.1027.

**2-Chloro-1-cyclohexylethan-1-one (2c):**<sup>11</sup> Yellowish oil (200 mg, 89%).  $R_f$  (2% EtOAc/hexane): 0.54. IR:  $\nu$  2929, 2855, 1722, 1709, 1450, 1396, 1371, 1275, 1267, 1261, 768, 742  $\text{cm}^{-1}$ .  $^1\text{H-NMR}$  (300.13 MHz,  $\text{CDCl}_3$ ):  $\delta$  4.18 (*s*, 2H), 2.64 (*tt*,  $J = 11.2, 3.3$  Hz, 1H), 1.90–1.78 (*m*, 4H), 1.69 (*m*, 1H), 1.46–1.19 (*m*, 5H).  $^{13}\text{C-NMR}$  (75.5 MHz,  $\text{CDCl}_3$ ):  $\delta$  205.0 (C), 47.8 ( $\text{CH}_2$ ), 47.3 (CH), 28.4 (2 $\text{CH}_2$ ), 25.6 ( $\text{CH}_2$ ), 25.5 (2 $\text{CH}_2$ ). HRMS (ESI<sup>+</sup>,  $m/z$ ): calcd for  $(\text{C}_8\text{H}_{13}\text{ClNaO})^+$  ( $\text{M}+\text{Na}$ )<sup>+</sup>: 183.0547; found 183.0548.

**1-Chloro-4-phenylbutan-2-one (2d):**<sup>11</sup> Yellowish oil (182 mg, 82%).  $R_f$  (10% EtOAc/hexane): 0.38. IR:  $\nu$  3028, 2929, 1733, 1721, 1717, 1454, 1398, 1257, 1083, 1065, 752, 698, 552, 495  $\text{cm}^{-1}$ .  $^1\text{H-NMR}$  (300.13 MHz,  $\text{CDCl}_3$ ):  $\delta$  7.35–7.20 (*m*, 5H), 4.06 (*s*, 2H), 2.97 (*m*, 4H).  $^{13}\text{C-NMR}$  (75.5 MHz,  $\text{CDCl}_3$ ):  $\delta$  201.9 (C), 140.3 (C), 128.6 (2CH), 128.3 (2CH), 126.4 (CH), 48.3 ( $\text{CH}_2$ ), 41.3 ( $\text{CH}_2$ ), 29.6 ( $\text{CH}_2$ ). HRMS (ESI<sup>+</sup>,  $m/z$ ): calcd for  $(\text{C}_{10}\text{H}_{11}\text{ClNaO})^+$  ( $\text{M}+\text{Na}$ )<sup>+</sup>: 205.0391; found 205.0399.

**Ethyl 7-chloro-6-oxoheptanoate (2e):**<sup>12</sup> Yellowish oil (180 mg, 82%).  $R_f$  (50% Et<sub>2</sub>O/pentane): 0.49. IR:  $\nu$  2980, 2939, 1723, 1374, 1177, 1027, 768, 414  $\text{cm}^{-1}$ .  $^1\text{H-NMR}$



(300.13 MHz, CDCl<sub>3</sub>):  $\delta$  4.13 (*m*, 4H), 2.64 (*m*, 2H), 2.33 (*m*, 2H), 1.67 (*m*, 4H), 1.26 (*t*,  $J = 7.1$  Hz, 3H). <sup>13</sup>C-NMR (75.5 MHz, CDCl<sub>3</sub>):  $\delta$  202.8 (C), 173.8 (C), 60.8 (CH<sub>2</sub>), 48.7 (CH<sub>2</sub>), 39.7 (CH<sub>2</sub>), 34.4 (CH<sub>2</sub>), 24.6 (CH<sub>2</sub>), 23.3 (CH<sub>2</sub>), 14.7 (CH<sub>3</sub>). HRMS (ESI<sup>+</sup>, *m/z*): calcd for (C<sub>9</sub>H<sub>16</sub>ClO<sub>3</sub>)<sup>+</sup> (M+H)<sup>+</sup>: 207.0782; found 207.0785.

**1-Benzyloxy-3-chloropropan-2-one (2f):**<sup>13</sup> Yellowish oil (180 mg, 82%). *R<sub>f</sub>* (20% EtOAc/hexane): 0.45. IR:  $\nu$  3005, 2990, 1741, 1275, 1267, 1261, 1097, 763, 750, 698 cm<sup>-1</sup>. <sup>1</sup>H-NMR (300.13 MHz, CDCl<sub>3</sub>):  $\delta$  7.43–7.33 (*m*, 5H), 4.63 (*s*, 2H), 4.32 (*s*, 2H), 4.27 (*s*, 2H). <sup>13</sup>C-NMR (75.5 MHz, CDCl<sub>3</sub>):  $\delta$  200.3 (C), 136.6 (C), 128.7 (2CH), 128.3 (CH), 128.0 (2CH), 73.7 (CH<sub>2</sub>), 73.6 (CH<sub>2</sub>), 46.7 (CH<sub>2</sub>). HRMS (ESI<sup>+</sup>, *m/z*): calcd for (C<sub>10</sub>H<sub>11</sub>ClNaO<sub>2</sub>)<sup>+</sup> (M+Na)<sup>+</sup>: 221.0340; found 221.0347.

**6-Chloro-5-oxohexyl 4-methylbenzenesulfonate (2g):**<sup>11</sup> Yellowish oil (189 mg, 89%). *R<sub>f</sub>* (50% EtOAc/hexane): 0.65. IR:  $\nu$  2961, 2923, 2868, 1716, 1579, 1469, 1455, 1328, 1276, 1153, 768, 749, 736, 704, 548 cm<sup>-1</sup>. <sup>1</sup>H-NMR (300.13 MHz, CDCl<sub>3</sub>):  $\delta$  7.79 (*d*,  $J = 8.2$  Hz, 2H), 7.37 (*d*,  $J = 8.0$  Hz, 2H), 4.04 (*m*, 4H), 2.60 (*t*,  $J = 6.4$  Hz, 2H), 2.47 (*s*, 3H), 1.69 (*m*, 4H). <sup>13</sup>C-NMR (75.5 MHz, CDCl<sub>3</sub>):  $\delta$  202.0 (C), 144.9 (C), 133.0 (C), 129.9 (2CH), 127.9 (2CH), 70.0 (CH<sub>2</sub>), 48.1 (CH<sub>2</sub>), 38.6 (CH<sub>2</sub>), 28.0 (CH<sub>2</sub>), 21.7 (CH<sub>2</sub>), 19.5 (CH<sub>3</sub>). HRMS (ESI<sup>+</sup>, *m/z*): calcd for (C<sub>13</sub>H<sub>17</sub>ClNaO<sub>4</sub>S)<sup>+</sup> (M+Na)<sup>+</sup>: 327.0428; found 327.0444.

## V. Full characterization of $\beta$ -chlorohydrins **3** obtained after chemical reduction of $\alpha$ -chloro ketones **2**

Full characterizations of alcohols **3a-d,f,h** appear below, while the obtained specific rotation values of the enantioenriched derivatives appear in Section XI (Table S20):

**1-Chlorooctan-2-ol (3a):**<sup>14</sup> Yellowish oil (29 mg, 88%).  $R_f$  (10% EtOAc/hexane): 0.37. IR:  $\nu$  3375, 3005, 2987, 1275, 1260 and 763  $\text{cm}^{-1}$ .  $^1\text{H-NMR}$  (300.13 MHz,  $\text{CDCl}_3$ ):  $\delta$  3.79 (*m*, 1H), 3.63 (*dd*,  $J = 11.0, 3.2$  Hz, 1H), 3.47 (*dd*,  $J = 11.1, 7.1$  Hz, 1H), 2.22 (*br s*, 1H), 1.57–1.47 (*m*, 2H), 1.30 (*m*, 8H), 0.87 (*t*,  $J = 6.9$  Hz, 3H).  $^{13}\text{C-NMR}$  (75.5 MHz,  $\text{CDCl}_3$ ):  $\delta$  71.5 (CH), 50.6 ( $\text{CH}_2$ ), 34.2 ( $\text{CH}_2$ ), 31.7 ( $\text{CH}_2$ ), 29.2 ( $\text{CH}_2$ ), 25.5 ( $\text{CH}_2$ ), 22.6 ( $\text{CH}_2$ ), 14.1 ( $\text{CH}_3$ ). HRMS (ESI<sup>+</sup>, *m/z*): calcd for  $(\text{C}_8\text{H}_{17}\text{ClNaO})^+$  ( $\text{M}+\text{Na}$ )<sup>+</sup>: 187.0866; found 187.0870.

**1-Chlorodecan-2-ol (3b):**<sup>15</sup> Yellowish oil (33 mg, 86%).  $R_f$  (10% EtOAc/hexane): 0.40. IR:  $\nu$  3347, 3005, 1275, 1267, 1261, 769, 759  $\text{cm}^{-1}$ .  $^1\text{H-NMR}$  (300.13 MHz,  $\text{CDCl}_3$ ):  $\delta$  3.82 (*m*, 1H), 3.66 (*dd*,  $J = 11.0, 3.2$  Hz, 1H), 3.50 (*dd*,  $J = 11.1, 7.1$  Hz, 1H), 2.16 (*d*,  $J = 4.8$  Hz, 1H), 1.55 (*m*, 2H), 1.30 (*m*, 12H), 0.90 (*t*,  $J = 6.7$  Hz, 3H).  $^{13}\text{C-NMR}$  (75.5 MHz,  $\text{CDCl}_3$ ):  $\delta$  71.5 (CH), 50.6 ( $\text{CH}_2$ ), 34.2 ( $\text{CH}_2$ ), 31.9 ( $\text{CH}_2$ ), 29.5 ( $\text{CH}_2$ ), 29.4 ( $\text{CH}_2$ ), 29.2 ( $\text{CH}_2$ ), 25.5 ( $\text{CH}_2$ ), 22.7 ( $\text{CH}_2$ ), 14.1 ( $\text{CH}_3$ ). HRMS (ESI<sup>+</sup>, *m/z*): calcd for  $(\text{C}_{10}\text{H}_{21}\text{ClNaO})^+$  ( $\text{M}+\text{Na}$ )<sup>+</sup>: 215.1173; found 215.1176.

**2-Chloro-1-cyclohexylethan-1-ol (3c):**<sup>16</sup> Yellowish oil (22 mg, 68%).  $R_f$  (20% EtOAc/pentane): 0.25. IR:  $\nu$  3367, 3005, 1275, 1267, 1261, 741, 726  $\text{cm}^{-1}$ .  $^1\text{H-NMR}$  (300.13 MHz,  $\text{CDCl}_3$ ):  $\delta$  3.76–3.68 (*m*, 1H), 3.61–3.52 (*m*, 2H), 2.20 (*s*, 1H), 1.92 (*m*, 1H), 1.82–1.65 (*m*, 4H), 1.52 (*m*, 1H), 1.35–1.00 (*m*, 5H).  $^{13}\text{C-NMR}$  (75.5 MHz,  $\text{CDCl}_3$ ):  $\delta$  75.6 (CH), 49.2 ( $\text{CH}_2$ ), 41.3 (CH), 29.0 ( $\text{CH}_2$ ), 28.3 ( $\text{CH}_2$ ), 26.3 ( $\text{CH}_2$ ), 26.0 ( $\text{CH}_2$ ), 25.9 ( $\text{CH}_2$ ). HRMS (ESI<sup>+</sup>, *m/z*): calcd for  $(\text{C}_8\text{H}_{15}\text{ClNaO})^+$  ( $\text{M}+\text{Na}$ )<sup>+</sup>: 185.0704; found 185.0709.

**1-Chloro-4-phenylbutan-2-ol (3d):**<sup>17</sup> Yellowish oil (34 mg, 91%).  $R_f$  (30% EtOAc/hexane): 0.51. IR:  $\nu$  3414, 3364, 2951, 2911, 1600, 1423, 1344, 1091, 1076, 854, 754, 728, 700, 597, 510, 474, 466  $\text{cm}^{-1}$ .  $^1\text{H-NMR}$  (300.13 MHz,  $\text{CDCl}_3$ ):  $\delta$  7.36–7.21 (*m*, 5H), 3.85 (*m*, 1H), 3.66 (*dd*,  $J = 11.1, 3.3$  Hz, 1H), 3.53 (*dd*,  $J = 11.1, 7.0$  Hz, 1H), 2.87–

2.73 (*m*, 2H), 2.32 (*d*,  $J = 3.9$  Hz, 1H), 1.88 (*m*, 2H).  $^{13}\text{C-NMR}$  (75.5 MHz,  $\text{CDCl}_3$ ):  $\delta$  141.3 (C), 128.5 (2CH), 128.4 (2CH), 126.1 (CH), 70.6 (CH), 50.5 ( $\text{CH}_2$ ), 35.8 ( $\text{CH}_2$ ), 31.8 ( $\text{CH}_2$ ). HRMS ( $\text{ESI}^+$ ,  $m/z$ ): calcd for  $(\text{C}_{10}\text{H}_{13}\text{ClNaO})^+$  ( $\text{M}+\text{Na}$ ) $^+$ : 207.0547; found 207.0551.

**1-Benzyloxy-3-chloropropan-2-ol (3f):**<sup>18</sup> Yellowish oil (36 mg, 89%).  $R_f$  (10% EtOAc/hexane): 0.12. IR:  $\nu$  3359, 2989, 2962, 1275, 1267, 1261, 1098, 764, 750  $\text{cm}^{-1}$ .  $^1\text{H-NMR}$  (300.13 MHz,  $\text{CDCl}_3$ ):  $\delta$  7.42–7.33 (*m*, 5H), 4.59 (*s*, 2H), 4.10–3.99 (*m*, 1H), 3.73–3.52 (*m*, 4H), 2.57 (*d*,  $J = 5.6$  Hz, 1H).  $^{13}\text{C-NMR}$  (75.5 MHz,  $\text{CDCl}_3$ ):  $\delta$  137.6 (C), 128.5 (2CH), 128.0 (CH), 127.8 (2CH), 73.6 ( $\text{CH}_2$ ), 70.8 ( $\text{CH}_2$ ), 70.3 (CH), 46.1 ( $\text{CH}_2$ ).

**(E)-1-Chloro-4,8-dimethylnona-3,7-dien-2-ol (3h):**<sup>19</sup> Yellowish oil (30 mg, 74%).  $R_f$  (10% Et<sub>2</sub>O/pentane): 0.17. IR:  $\nu$  3347, 2967, 2916, 2849, 1668, 1441, 1276, 1259, 1060, 1003, 763, 749  $\text{cm}^{-1}$ .  $^1\text{H-NMR}$  (300.13 MHz,  $\text{CDCl}_3$ ):  $\delta$  5.20 (*d*,  $J = 8.2$  Hz, 1H), 5.08 (*t*,  $J = 6.6$  Hz, 1H), 4.57 (*dt*,  $J = 7.9, 4.1$  Hz, 1H), 3.63–3.43 (*m*, 2H), 2.31 (*m*, 1H), 2.13–2.00 (*m*, 4H), 1.72 (*s*, 3H), 1.69 (*s*, 3H), 1.61 (*s*, 3H).  $^{13}\text{C-NMR}$  (75.5 MHz,  $\text{CDCl}_3$ ):  $\delta$  141.7 (C), 131.9 (C), 123.6 (CH), 123.0 (CH), 68.8 (CH), 49.7 ( $\text{CH}_2$ ), 39.5 ( $\text{CH}_2$ ), 26.3 ( $\text{CH}_2$ ), 25.6 ( $\text{CH}_3$ ), 17.7 ( $\text{CH}_3$ ), 16.9 ( $\text{CH}_3$ ). HRMS ( $\text{ESI}^+$ ,  $m/z$ ): calcd for  $(\text{C}_{11}\text{H}_{19}\text{ClNaO})^+$  ( $\text{M}+\text{Na}$ ) $^+$ : 225.1017; found 225.1023. (*S*)-**3h**, *ee* >99%,  $[\alpha]_{\text{D}}^{20}$ :  $-3.5$  (*c* 1.0,  $\text{CHCl}_3$ ).

## **VI. Experimental protocols and screening results for the reduction of $\alpha$ -chloromethyl ketones using different ADHs**

### ***VI.1. Bioreduction of 2a using ADH-A***

$\alpha$ -Chloroketone **2a** (2.4 mg, 0.015 mmol), 2-Me-THF (120  $\mu$ L), 2-PrOH (0.03 mmol, 2.4  $\mu$ L), a NADH aqueous solution (10 mM, 60  $\mu$ L), distilled water (420  $\mu$ L) and lyophilized cells of *E. coli* overexpressing ADH-A (10 mg) were successively added to a 1.5 mL-Eppendorf tube. Then, the recipient was closed and kept under orbital shaking at 220 rpm at 40 °C for 24 h. After this time, the solution was extracted with Et<sub>2</sub>O (3 x 0.5 mL), the organic layers combined, dried over anhydrous Na<sub>2</sub>SO<sub>4</sub> and filtered. The solution was concentrated, measuring then the reaction conversion and the enantiomeric excess of alcohol **3a** by GC analyses.

### ***VI.2. Bioreduction of 2a using ADH-T, TeSADH and SyADH***

$\alpha$ -Chloroketone **2a** (2.4 mg, 0.015 mmol), 2-Me-THF (120  $\mu$ L), 2-PrOH (0.03 mmol, 2.4  $\mu$ L), a NADPH aqueous solution (10 mM, 60  $\mu$ L), distilled water (420  $\mu$ L) and lyophilized cells of *E. coli* overexpressing the corresponding ADH (10 mg) were successively added to a 1.5 mL-Eppendorf tube. Then, the recipient was closed and kept under orbital shaking at 220 rpm at 40 °C for 24 h. After this time, the solution was extracted with Et<sub>2</sub>O (3 x 0.5 mL), the organic layers combined, dried over anhydrous Na<sub>2</sub>SO<sub>4</sub> and filtered. The solution was concentrated, measuring then the reaction conversion and the enantiomeric excess of alcohol **3a** by GC analyses.

### ***VI.3. Bioreduction of 2a using LbADH***

$\alpha$ -Chloroketone **2a** (2.4 mg, 0.015 mmol), 2-Me-THF (126  $\mu$ L), 2-PrOH (0.03 mmol, 2.4  $\mu$ L), a NADPH aqueous solution (10 mM, 60  $\mu$ L), a MgCl<sub>2</sub> aqueous solution (10 mM, 60  $\mu$ L), distilled water (384  $\mu$ L) and lyophilized cells of *E. coli* overexpressing LbADH (10 mg) were successively added to a 1.5 mL-Eppendorf tube. Then, the recipient was closed and kept under orbital shaking at 220 rpm at 40 °C for 24 h. After this time, the solution was extracted with Et<sub>2</sub>O (3 x 0.5 mL), the organic layers combined, dried over anhydrous

Na<sub>2</sub>SO<sub>4</sub> and filtered. The solution was concentrated, measuring then the reaction conversion and the enantiomeric excess of alcohol **3a** by GC analyses.

#### ***VI.4. Bioreduction of 2a using commercial evo.1.1.200***

$\alpha$ -Chloroketone **2a** (2.4 mg, 0.015 mmol), 2-Me-THF (126  $\mu$ L), 2-PrOH (0.03 mmol, 2.4  $\mu$ L), a NADH aqueous solution (10 mM, 60  $\mu$ L), a MgCl<sub>2</sub> aqueous solution (10 mM, 60  $\mu$ L), distilled water (384  $\mu$ L) and evo.1.1.200 (2.4 mg) were successively added to a 1.5 mL-Eppendorf tube. Then, the recipient was closed and kept under orbital shaking at 220 rpm at 40 °C for 24 h. After this time, the solution was extracted with Et<sub>2</sub>O (3 x 0.5 mL), the organic layers combined, dried over anhydrous Na<sub>2</sub>SO<sub>4</sub> and filtered. The solution was concentrated, measuring then the reaction conversion and the enantiomeric excess of alcohol **3a** by GC analyses.

#### ***VI.5. Bioreduction of 2a using commercial ADHs from Codexis***

The selected commercially available Codexis KRED (2.4 mg) was added to a 1.5 mL Eppendorf tube containing  $\alpha$ -chloroketone **2a** (2.4 mg, 0.015 mmol), 2-Me-THF (126  $\mu$ L), 2-PrOH (0.03 mmol, 2.4  $\mu$ L), a NADPH aqueous solution (10 mM, 60  $\mu$ L), a MgCl<sub>2</sub> aqueous solution (10 mM, 60  $\mu$ L) and distilled water (384  $\mu$ L). Then, the recipient was closed and kept under orbital shaking at 220 rpm at 40 °C for 24 h. After this time, the product was extracted with Et<sub>2</sub>O (3  $\times$  0.5 mL), the organic layers combined, dried over anhydrous Na<sub>2</sub>SO<sub>4</sub> and filtered. The solution was concentrated, measuring then the reaction conversion and the enantiomeric excess of alcohol **3a** by GC analyses.

## VI.6. Summary of results in the bioreduction of ketone 2a

**Table S3.** Screening of different ADHs for the asymmetric bioreduction of **2a**.<sup>a</sup>

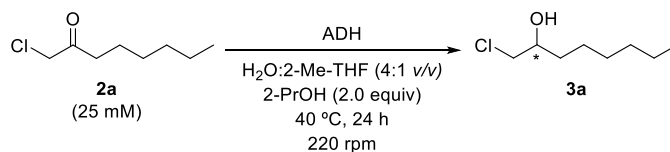

| Entry | ADH <sup>b</sup> | <b>3a</b> (%) <sup>c</sup> | <b>3a ee</b> (%) <sup>d</sup> |
|-------|------------------|----------------------------|-------------------------------|
| 1     | ADH-A            | >99                        | >99 ( <i>R</i> )              |
| 2     | ADH-T            | 68                         | 71 ( <i>R</i> )               |
| 3     | <i>Te</i> SADH   | <1                         | <i>n.d.</i>                   |
| 4     | <i>Sy</i> ADH    | 36                         | 62 ( <i>S</i> )               |
| 5     | <i>Lb</i> ADH    | >99                        | >99 ( <i>S</i> )              |
| 6     | evo.1.1.200      | 97                         | >99 ( <i>S</i> )              |
| 7     | KRED-P1-A04      | 97                         | >99 ( <i>S</i> )              |
| 8     | KRED-P1-A12      | 65                         | 76 ( <i>S</i> )               |
| 9     | KRED-P1-B02      | 97                         | 84 ( <i>S</i> )               |
| 10    | KRED-P1-B05      | 48                         | 70 ( <i>S</i> )               |
| 11    | KRED-P1-B10      | 81                         | 86 ( <i>S</i> )               |
| 12    | KRED-P1-B12      | 98                         | >99 ( <i>S</i> )              |
| 13    | KRED-P1-C01      | 99                         | 79 ( <i>S</i> )               |
| 14    | KRED-P1-H08      | 99                         | 58 ( <i>S</i> )               |
| 15    | KRED-P2-B02      | 99                         | <1                            |
| 16    | KRED-P2-C02      | 98                         | 60 ( <i>S</i> )               |
| 17    | KRED-P2-C11      | 95                         | 80 ( <i>S</i> )               |
| 18    | KRED-P2-D03      | 95                         | 46 ( <i>S</i> )               |
| 19    | KRED-P2-D11      | 98                         | >99 ( <i>S</i> )              |
| 20    | KRED-P2-D12      | 97                         | >99 ( <i>S</i> )              |
| 21    | KRED-P2-G03      | 99                         | 35 ( <i>S</i> )               |
| 22    | KRED-P2-H07      | 98                         | 86 ( <i>S</i> )               |
| 23    | KRED-P3-B03      | 96                         | >99 ( <i>R</i> )              |
| 24    | KRED-P3-G09      | 98                         | >99 ( <i>R</i> )              |
| 25    | KRED-P3-H12      | 98                         | >99 ( <i>R</i> )              |

<sup>a</sup> See Sections VI.1 to VI.5 for general procedures with all tested enzymes.

<sup>b</sup> The coupled-substrate system employing 2-PrOH as cosubstrate was used for cofactor recycling purposes.

<sup>c</sup> Product percentages were determined by GC analysis (see Section X for further details).

<sup>d</sup> Enantiomeric excess values were determined by GC analysis using a chiral column after acetylation of the halohydrin obtained in the reaction crude with acetic anhydride and DMAP. The configuration of the major enantiomer appears in parentheses. *n.d.*: not determined.

## VI.7. Summary of results in the bioreduction of ketone **2c**

**Table S4.** Screening of different ADHs for the asymmetric bioreduction of **2c**.<sup>a</sup>

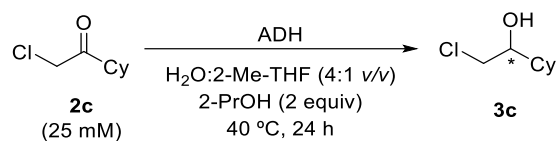

| Entry | ADH            | <b>3c</b> (%) <sup>b</sup> | <b>3c</b> ee (%) <sup>c</sup> |
|-------|----------------|----------------------------|-------------------------------|
| 1     | ADH-A          | 51                         | >99 ( <i>R</i> )              |
| 2     | ADH-T          | 41                         | >99 ( <i>R</i> )              |
| 3     | <i>Te</i> SADH | <1                         | <i>n.d.</i>                   |
| 4     | <i>Sy</i> ADH  | <1                         | <i>n.d.</i>                   |
| 5     | <i>Lb</i> ADH  | 98                         | >99 ( <i>S</i> )              |
|       |                |                            |                               |
| 6     | evo.1.1.200    | >99                        | >99 ( <i>S</i> )              |
| 7     | KRED-P1-A04    | >99                        | >99 ( <i>S</i> )              |
| 8     | KRED-P1-A12    | 97                         | >99 ( <i>S</i> )              |
| 9     | KRED-P1-B02    | 98                         | 85 ( <i>S</i> )               |
| 10    | KRED-P1-B05    | 9                          | <i>n.d.</i>                   |
| 11    | KRED-P1-B10    | 98                         | 81 ( <i>S</i> )               |
| 12    | KRED-P1-B12    | 98                         | 95 ( <i>S</i> )               |
| 13    | KRED-P1-C01    | >99                        | <1                            |
| 14    | KRED-P1-H08    | 99                         | <1                            |
| 15    | KRED-P2-B02    | 98                         | <1                            |
| 16    | KRED-P2-C02    | 96                         | 10 ( <i>S</i> )               |
| 17    | KRED-P2-C11    | 97                         | 97 ( <i>S</i> )               |
| 18    | KRED-P2-D03    | 98                         | 55 ( <i>S</i> )               |
| 19    | KRED-P2-D11    | >99                        | 6 ( <i>S</i> )                |
| 20    | KRED-P2-D12    | 72                         | 87 ( <i>S</i> )               |
| 21    | KRED-P2-G03    | 98                         | 91 ( <i>S</i> )               |
| 22    | KRED-P2-H07    | 97                         | >99 ( <i>S</i> )              |
| 23    | KRED-P3-B03    | 15                         | 60 ( <i>R</i> )               |
| 24    | KRED-P3-G09    | 6                          | <i>n.d.</i>                   |
| 25    | KRED-P3-H12    | 26                         | 96 ( <i>R</i> )               |

<sup>a</sup> Procedures already applied to ketone **2a** were used for the bioreduction of **2c** considering the mmol substrate/weight enzyme ratio.

<sup>b</sup> Product percentages were determined by GC analysis.

<sup>c</sup> Enantiomeric excess values were determined by GC analysis using a chiral column after acetylation of the halohydrin obtained in the reaction crude with acetic anhydride and DMAP. The configuration of the major enantiomer appears in parentheses. Change in the CIP priority. *n.d.*: not determined.

## VI.8. Summary of results in the bioreduction of ketone **2d**

**Table S5.** Screening of different ADHs for the asymmetric bioreduction of **2d**.<sup>a</sup>

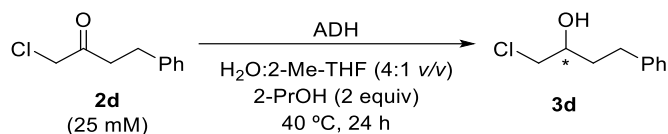

| Entry | ADH            | <b>3d</b> (%) <sup>b</sup> | <b>3d ee</b> (%) <sup>c</sup> |
|-------|----------------|----------------------------|-------------------------------|
| 1     | ADH-A          | >99                        | >99 ( <i>R</i> )              |
| 2     | ADH-T          | 98                         | >99 ( <i>R</i> )              |
| 3     | <i>Te</i> SADH | 47                         | >99 ( <i>R</i> )              |
| 4     | <i>Hl</i> ADH  | 3                          | <i>n.d.</i>                   |
| 5     | <i>Lb</i> ADH  | 99                         | >99 ( <i>S</i> )              |
| 6     | evo.1.1.200    | 99                         | >99 ( <i>S</i> )              |
| 7     | KRED-P1-A04    | 99                         | >99 ( <i>S</i> )              |
| 8     | KRED-P1-A12    | 99                         | >99 ( <i>S</i> )              |
| 9     | KRED-P1-B05    | 55                         | >99 ( <i>S</i> )              |
| 10    | KRED-P1-B10    | 98                         | >99 ( <i>S</i> )              |
| 11    | KRED-P1-B12    | 99                         | >99 ( <i>S</i> )              |
| 12    | KRED-P1-C01    | 98                         | <1                            |
| 13    | KRED-P1-H08    | 98                         | 80 ( <i>S</i> )               |
| 14    | KRED-P2-B02    | 98                         | <1                            |
| 15    | KRED-P2-C02    | 96                         | <1                            |
| 16    | KRED-P2-C11    | 99                         | <1                            |
| 17    | KRED-P2-D03    | 99                         | >99 ( <i>S</i> )              |
| 18    | KRED-P2-D11    | 99                         | <1                            |
| 19    | KRED-P2-D12    | 92                         | 86 ( <i>S</i> )               |
| 20    | KRED-P2-G03    | 99                         | 42 ( <i>S</i> )               |
| 21    | KRED-P2-H07    | 99                         | 94 ( <i>S</i> )               |
| 22    | KRED-P3-B03    | 93                         | >99 ( <i>S</i> )              |
| 23    | KRED-P3-G09    | 64                         | 26 ( <i>R</i> )               |
| 24    | KRED-P3-H12    | 80                         | 74 ( <i>R</i> )               |

<sup>a</sup> Procedures already applied to ketone **2a** were used for the bioreduction of **2d** considering the mmol substrate/weight enzyme ratio.

<sup>b</sup> Product percentages were determined by HPLC analysis.

<sup>c</sup> Enantiomeric excess values were determined by chiral HPLC analysis. The configuration of the major enantiomer appears in parentheses. Change in the CIP priority. *n.d.*: not determined.



## VI.9. Summary of results in the bioreduction of ketone **2e**

**Table S6.** Screening of different ADHs for the asymmetric bioreduction of **2e**.<sup>a</sup>

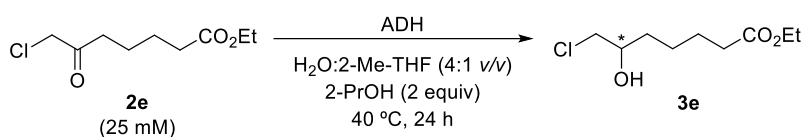

| Entry | ADH            | <b>3e</b> (%) <sup>b</sup> | <b>3e ee</b> (%) <sup>c</sup> |
|-------|----------------|----------------------------|-------------------------------|
| 1     | ADH-A          | >99                        | >99 ( <i>R</i> )              |
| 2     | ADH-T          | 10                         | <i>n.d.</i>                   |
| 3     | <i>Te</i> SADH | 48                         | <i>n.d.</i>                   |
| 4     | <i>Hl</i> ADH  | 21                         | <i>n.d.</i>                   |
| 5     | <i>Lb</i> ADH  | 99                         | >99 ( <i>S</i> )              |
| 6     | evo.1.1.200    | 99                         | >99 ( <i>S</i> )              |
| 7     | KRED-P1-A04    | 99                         | >99 ( <i>S</i> )              |
| 8     | KRED-P1-A12    | 98                         | >99 ( <i>S</i> )              |
| 9     | KRED-P1-B02    | 98                         | 86 ( <i>S</i> )               |
| 10    | KRED-P1-B05    | 35                         | <i>n.d.</i>                   |
| 11    | KRED-P1-B10    | 99                         | >99 ( <i>S</i> )              |
| 12    | KRED-P1-B12    | 98                         | 94 ( <i>S</i> )               |
| 13    | KRED-P1-C01    | 99                         | 58 ( <i>S</i> )               |
| 15    | KRED-P2-B02    | >99                        | <1                            |
| 16    | KRED-P2-C02    | 99                         | 22 ( <i>S</i> )               |
| 18    | KRED-P2-D03    | 99                         | 30 ( <i>S</i> )               |
| 19    | KRED-P2-D11    | 99                         | >99 ( <i>S</i> )              |
| 20    | KRED-P2-D12    | 91                         | >99 ( <i>S</i> )              |
| 21    | KRED-P2-G03    | 99                         | >99 ( <i>S</i> )              |
| 22    | KRED-P2-H07    | 99                         | >99 ( <i>S</i> )              |
| 23    | KRED-P3-B03    | >99                        | 46 ( <i>S</i> )               |
| 24    | KRED-P3-G09    | 41                         | <i>n.d.</i>                   |
| 25    | KRED-P3-H12    | 70                         | <1                            |

<sup>a</sup> Procedures already applied to ketone **2a** were used for the bioreduction of **2e** considering the mmol substrate/weight enzyme ratio.

<sup>b</sup> Product percentages were determined by GC analysis.

<sup>c</sup> Enantiomeric excess values were determined by GC analysis using a chiral column after acetylation of the halohydrin obtained in the reaction crude with acetic anhydride and DMAP. The configuration of the major enantiomer appears in parentheses. Change in the CIP priority. *n.d.*: not determined.

## VI.10. Summary of results in the bioreduction of ketone **2f**

**Table S7.** Screening of different ADHs for the asymmetric bioreduction of **2f**.<sup>a</sup>

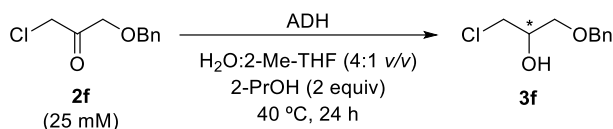

| Entry | ADH           | <b>3f</b> (%) <sup>b</sup> | <b>3f ee</b> (%) <sup>c</sup> |
|-------|---------------|----------------------------|-------------------------------|
| 1     | ADH-A         | 99                         | >99 ( <i>R</i> )              |
| 2     | ADH-T         | 20                         | <i>n.d.</i>                   |
| 3     | <i>TeSADH</i> | 89                         | 40 ( <i>S</i> )               |
| 4     | <i>HlADH</i>  | 40                         | <i>n.d.</i>                   |
| 5     | <i>LbADH</i>  | >99                        | >99 ( <i>S</i> )              |
| <hr/> |               |                            |                               |
| 6     | evo.1.1.200   | 99                         | >99 ( <i>S</i> )              |
| 7     | KRED-P1-A04   | 99                         | >99 ( <i>S</i> )              |
| 8     | KRED-P1-A12   | 98                         | >99 ( <i>S</i> )              |
| 9     | KRED-P1-B02   | 70                         | >99 ( <i>S</i> )              |
| 10    | KRED-P1-B05   | 61                         | >99 ( <i>S</i> )              |
| 11    | KRED-P1-B10   | >99                        | >99 ( <i>S</i> )              |
| 12    | KRED-P1-B12   | 97                         | >99 ( <i>S</i> )              |
| 13    | KRED-P1-C01   | >99                        | 68 ( <i>S</i> )               |
| 14    | KRED-P1-H08   | 93                         | <1                            |
| 15    | KRED-P2-B02   | 95                         | 42 ( <i>S</i> )               |
| 16    | KRED-P2-C02   | >99                        | 76 ( <i>S</i> )               |
| 17    | KRED-P2-C11   | 97                         | >99 ( <i>S</i> )              |
| 18    | KRED-P2-D03   | >99                        | >99 ( <i>S</i> )              |
| 19    | KRED-P2-D11   | >99                        | >99 ( <i>S</i> )              |
| 20    | KRED-P2-D12   | >99                        | 40 ( <i>S</i> )               |
| 21    | KRED-P2-G03   | >99                        | >99 ( <i>S</i> )              |
| 22    | KRED-P2-H07   | >99                        | >99 ( <i>S</i> )              |
| 23    | KRED-P3-B03   | >99                        | >99 ( <i>R</i> )              |
| 24    | KRED-P3-G09   | 65                         | >99 ( <i>R</i> )              |
| 25    | KRED-P3-H12   | 91                         | >99 ( <i>R</i> )              |

<sup>a</sup> Procedures already applied to ketone **2a** were used for the bioreduction of **2f** considering the mmol substrate/weight enzyme ratio.

<sup>b</sup> Product percentages were determined by HPLC analysis.

<sup>c</sup> Enantiomeric excess values were determined by HPLC analysis. The configuration of the major enantiomer appears in parentheses. Change in the CIP priority. *n.d.*: not determined.

## VI.11. Summary of results in the bioreduction of ketone **2g**

**Table S8.** Screening of different ADHs for the asymmetric bioreduction of **2g**.<sup>a</sup>

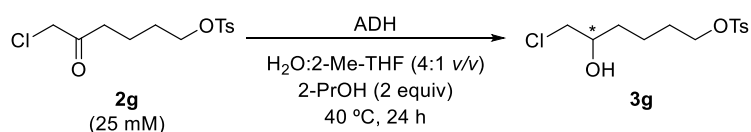

| Entry | ADH           | <b>3g</b> (%) <sup>b</sup> | <b>3g ee</b> (%) <sup>c</sup> |
|-------|---------------|----------------------------|-------------------------------|
| 1     | ADH-A         | 99                         | >99 ( <i>R</i> )              |
| 2     | ADH-T         | 35                         | 96 ( <i>R</i> )               |
| 3     | <i>TeSADH</i> | 11                         | 90 ( <i>R</i> )               |
| 4     | <i>HlADH</i>  | 11                         | 30 ( <i>R</i> )               |
| 5     | <i>LbADH</i>  | >99                        | >99 ( <i>S</i> )              |
| <hr/> |               |                            |                               |
| 6     | evo.1.1.200   | >99                        | >99 ( <i>S</i> )              |
| 7     | KRED-P1-A04   | >99                        | >99 ( <i>S</i> )              |
| 8     | KRED-P1-A12   | >99                        | >99 ( <i>S</i> )              |
| 9     | KRED-P1-B02   | >99                        | 98 ( <i>S</i> )               |
| 10    | KRED-P1-B05   | 28                         | 96 ( <i>S</i> )               |
| 11    | KRED-P1-B10   | 99                         | 98 ( <i>S</i> )               |
| 12    | KRED-P1-B12   | 99                         | 94 ( <i>S</i> )               |
| 13    | KRED-P1-C01   | 99                         | 90 ( <i>S</i> )               |
| 14    | KRED-P1-H08   | 99                         | 90 ( <i>S</i> )               |
| 15    | KRED-P2-B02   | 99                         | 64 ( <i>S</i> )               |
| 16    | KRED-P2-C02   | 99                         | 34 ( <i>S</i> )               |
| 17    | KRED-P2-C11   | 99                         | >99 ( <i>S</i> )              |
| 18    | KRED-P2-D03   | 99                         | 62 ( <i>S</i> )               |
| 19    | KRED-P2-D11   | 99                         | >99 ( <i>S</i> )              |
| 20    | KRED-P2-D12   | 88                         | 94 ( <i>S</i> )               |
| 21    | KRED-P2-G03   | 99                         | >99 ( <i>S</i> )              |
| 22    | KRED-P2-H07   | 99                         | >99 ( <i>S</i> )              |
| 23    | KRED-P3-B03   | 98                         | 80 ( <i>R</i> )               |
| 24    | KRED-P3-G09   | 66                         | 50 ( <i>R</i> )               |
| 25    | KRED-P3-H12   | 91                         | 86 ( <i>R</i> )               |

<sup>a</sup> Procedures already applied to ketone **2a** were used for the bioreduction of **2g** considering the mmol substrate/weight enzyme ratio.

<sup>b</sup> Product percentages were determined by HPLC analysis.

<sup>c</sup> Enantiomeric excess values were determined by HPLC analysis. The configuration of the major enantiomer appears in parentheses. Change in the CIP priority.

## VI.12. Summary of results in the bioreduction of ketone **2h**

**Table S9.** Screening of different ADHs for the asymmetric bioreduction of **2h**.<sup>a</sup>

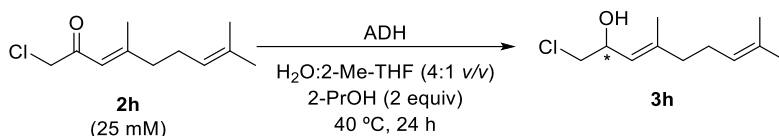

| Entry     | ADH            | <b>3i</b> (%) <sup>b</sup> | <b>3i ee</b> (%) <sup>c</sup> |
|-----------|----------------|----------------------------|-------------------------------|
| <b>1</b>  | ADH-A          | 2                          | <i>n.d.</i>                   |
| <b>2</b>  | ADH-T          | <1                         | <i>n.d.</i>                   |
| <b>3</b>  | <i>Te</i> SADH | <1                         | <i>n.d.</i>                   |
| <b>4</b>  | <i>Lb</i> ADH  | 53                         | >99 ( <i>S</i> )              |
| <b>5</b>  | <i>Hl</i> ADH  | 49                         | >99 ( <i>S</i> )              |
| <b>6</b>  | evo.1.1.200    | <1                         | <i>n.d.</i>                   |
| <b>7</b>  | KRED-P1-A04    | 55                         | >99 ( <i>S</i> )              |
| <b>8</b>  | KRED-P1-A12    | 10                         | <i>n.d.</i>                   |
| <b>10</b> | KRED-P1-B02    | 45                         | >99 ( <i>S</i> )              |
| <b>11</b> | KRED-P1-B05    | <1                         | <i>n.d.</i>                   |
| <b>12</b> | KRED-P1-B10    | 6                          | <i>n.d.</i>                   |
| <b>13</b> | KRED-P1-B12    | 14                         | <i>n.d.</i>                   |
| <b>14</b> | KRED-P1-C01    | 18                         | <i>n.d.</i>                   |
| <b>15</b> | KRED-P1-H08    | 6                          | <i>n.d.</i>                   |
| <b>16</b> | KRED-P2-B02    | 51                         | <1                            |
| <b>17</b> | KRED-P2-C02    | 11                         | <i>n.d.</i>                   |
| <b>18</b> | KRED-P2-C11    | 27                         | <i>n.d.</i>                   |
| <b>19</b> | KRED-P2-D03    | 14                         | <i>n.d.</i>                   |
| <b>20</b> | KRED-P2-D11    | 36                         | <i>n.d.</i>                   |
| <b>21</b> | KRED-P2-D12    | 4                          | <i>n.d.</i>                   |
| <b>22</b> | KRED-P2-G03    | 48                         | >99 ( <i>R</i> )              |
| <b>23</b> | KRED-P2-H07    | 56                         | >99 ( <i>S</i> )              |
| <b>24</b> | KRED-P3-B03    | 20                         | <i>n.d.</i>                   |
| <b>25</b> | KRED-P3-G09    | 68                         | 88 ( <i>R</i> )               |
| <b>26</b> | KRED-P3-H12    | <1                         | <i>n.d.</i>                   |

<sup>a</sup> Procedures already applied to ketone **2a** were used for the bioreduction of **2h** considering the mmol substrate/weight enzyme ratio.

<sup>b</sup> Product percentages were determined by GC analysis.

<sup>c</sup> Enantiomeric excess values were determined by GC analysis using a chiral column after acetylation of the halohydrin obtained in the reaction crude with acetic anhydride and DMAP. The configuration of the major enantiomer appears in parentheses. Change in the CIP priority. *n.d.*: not determined.

**Table S10.** Screening of different ADHs for the asymmetric bioreduction of **2h** using a higher amount of 2-PrOH.<sup>a</sup>

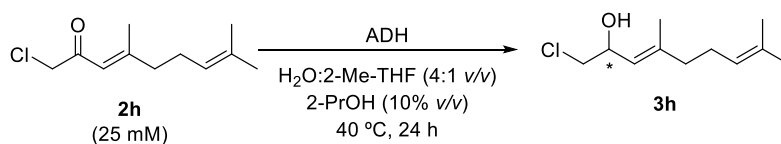

| Entry | ADH           | <b>3h</b> (%) <sup>b</sup> | <b>3h ee</b> (%) <sup>c</sup> |
|-------|---------------|----------------------------|-------------------------------|
| 1     | <i>Lb</i> ADH | 93                         | >99 ( <i>S</i> )              |
| 2     | <i>Hl</i> ADH | <1                         | <i>n.d.</i>                   |
| 3     | KRED-P1-A04   | 94                         | >99 ( <i>S</i> )              |
| 4     | KRED-P1-B02   | >99                        | >99 ( <i>S</i> )              |
| 5     | KRED-P2-B02   | 92                         | >99 ( <i>S</i> )              |
| 6     | KRED-P2-G03   | 68                         | 88 ( <i>R</i> )               |
| 7     | KRED-P2-H07   | 87                         | >99 ( <i>S</i> )              |
| 8     | KRED-P3-G09   | 10                         | <i>n.d.</i>                   |

<sup>a</sup> Procedures already applied to ketone **2a** were used for the bioreduction of **2h** considering the mmol substrate/weight enzyme ratio.

<sup>b</sup> Product percentages were determined by GC analysis.

<sup>c</sup> Enantiomeric excess values were determined by GC analysis using a chiral column after acetylation of the halohydrin obtained in the reaction crude with acetic anhydride and DMAP. The configuration of the major enantiomer appears in parentheses. Change in the CIP priority. *n.d.*: not determined.

### VI.13. Summary of results in the bioreduction of racemic and optically active ketone **2i**

**Table S11.** Screening of different ADHs for the asymmetric bioreduction of *rac*-**2i**.<sup>a</sup>

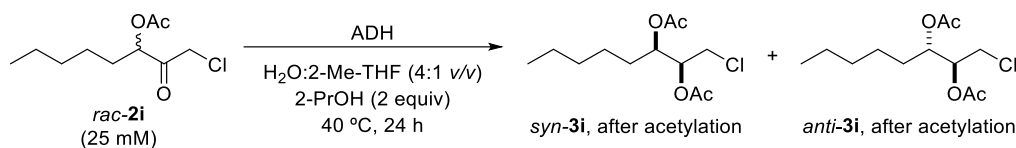

| Entry | ADH            | <b>3i</b> (%) <sup>b</sup> | <b>3i de</b> (%) <sup>c</sup> | <b>3i ee</b> (%) <sup>c</sup> |                               |
|-------|----------------|----------------------------|-------------------------------|-------------------------------|-------------------------------|
|       |                |                            |                               | <i>syn</i>                    | <i>anti</i>                   |
| 1     | ADH-A          | 50                         | 96 ( <i>anti</i> )            | <i>n.d.</i>                   | >99 (2 <i>R</i> ,3 <i>R</i> ) |
| 2     | ADH-T          | 42                         | >99 ( <i>anti</i> )           | <i>n.d.</i>                   | 88 (2 <i>R</i> ,3 <i>R</i> )  |
| 3     | <i>Te</i> SADH | 40                         | >99 ( <i>anti</i> )           | <i>n.d.</i>                   | 86 (2 <i>R</i> ,3 <i>R</i> )  |
| 4     | <i>Hl</i> ADH  | 34                         | >99 ( <i>anti</i> )           | <i>n.d.</i>                   | >99 (2 <i>R</i> ,3 <i>R</i> ) |
| 5     | <i>Lb</i> ADH  | 56                         | 82 ( <i>anti</i> )            | <i>n.d.</i>                   | >99 (2 <i>S</i> ,3 <i>S</i> ) |
| 6     | evo.1.1.200    | >99                        | <1                            | 95 (2 <i>S</i> ,3 <i>R</i> )  | >99 (2 <i>S</i> ,3 <i>S</i> ) |
| 7     | KRED-P1-A04    | 82                         | 36 ( <i>anti</i> )            | 95 (2 <i>S</i> ,3 <i>R</i> )  | >99 (2 <i>S</i> ,3 <i>S</i> ) |
| 8     | KRED-P1-A12    | 64                         | 60 ( <i>syn</i> )             | >99 (2 <i>S</i> ,3 <i>R</i> ) | 95 (2 <i>S</i> ,3 <i>S</i> )  |
| 9     | KRED-P1-B02    | 98                         | <1                            | 95 (2 <i>S</i> ,3 <i>R</i> )  | 96 (2 <i>S</i> ,3 <i>S</i> )  |
| 10    | KRED-P1-B05    | 40                         | >99 ( <i>anti</i> )           | <i>n.d.</i>                   | 94 (2 <i>S</i> ,3 <i>S</i> )  |
| 11    | KRED-P1-B10    | 32                         | >99 ( <i>anti</i> )           | <i>n.d.</i>                   | 92 (2 <i>S</i> ,3 <i>S</i> )  |
| 12    | KRED-P1-B12    | 84                         | 18 ( <i>syn</i> )             | >99 (2 <i>S</i> ,3 <i>R</i> ) | 94 (2 <i>S</i> ,3 <i>S</i> )  |
| 13    | KRED-P1-C01    | 80                         | 36 ( <i>syn</i> )             | >99 (2 <i>S</i> ,3 <i>R</i> ) | 95 (2 <i>S</i> ,3 <i>S</i> )  |
| 14    | KRED-P1-H08    | 43                         | 59 ( <i>anti</i> )            | 95 (2 <i>S</i> ,3 <i>R</i> )  | >99 (2 <i>S</i> ,3 <i>S</i> ) |
| 15    | KRED-P2-B02    | 94                         | 18 ( <i>anti</i> )            | 96 (2 <i>R</i> ,3 <i>S</i> )  | >99 (2 <i>R</i> ,3 <i>R</i> ) |
| 16    | KRED-P2-C02    | 59                         | 72 ( <i>anti</i> )            | 96 (2 <i>R</i> ,3 <i>S</i> )  | >99 (2 <i>R</i> ,3 <i>R</i> ) |
| 17    | KRED-P2-C11    | 78                         | 26 ( <i>anti</i> )            | >99 (2 <i>S</i> ,3 <i>R</i> ) | >99 (2 <i>S</i> ,3 <i>S</i> ) |
| 18    | KRED-P2-D03    | 81                         | 42 ( <i>anti</i> )            | 96 (2 <i>S</i> ,3 <i>R</i> )  | >99 (2 <i>S</i> ,3 <i>S</i> ) |
| 19    | KRED-P2-D11    | 98                         | 4 ( <i>syn</i> )              | >99 (2 <i>S</i> ,3 <i>R</i> ) | 96 (2 <i>S</i> ,3 <i>S</i> )  |
| 20    | KRED-P2-D12    | 66                         | 54 ( <i>anti</i> )            | 96 (2 <i>S</i> ,3 <i>R</i> )  | >99 (2 <i>S</i> ,3 <i>S</i> ) |
| 21    | KRED-P2-G03    | >99                        | 24 ( <i>anti</i> )            | 96 (2 <i>S</i> ,3 <i>R</i> )  | >99 (2 <i>S</i> ,3 <i>S</i> ) |
| 22    | KRED-P2-H07    | 92                         | 20 ( <i>syn</i> )             | >99 (2 <i>S</i> ,3 <i>R</i> ) | 96 (2 <i>S</i> ,3 <i>S</i> )  |
| 23    | KRED-P3-B03    | 32                         | >99 ( <i>anti</i> )           | <i>n.d.</i>                   | >99 (2 <i>R</i> ,3 <i>R</i> ) |
| 24    | KRED-P3-G09    | 48                         | >99 ( <i>anti</i> )           | <i>n.d.</i>                   | >99 (2 <i>R</i> ,3 <i>R</i> ) |
| 25    | KRED-P3-H12    | 30                         | >99 ( <i>anti</i> )           | <i>n.d.</i>                   | >99 (2 <i>R</i> ,3 <i>R</i> ) |

<sup>a</sup> Procedures already applied to ketone **2a** were used for the bioreduction of *rac*-**2i** considering the mmol substrate/weight enzyme ratio.

<sup>b</sup> Product percentages were determined by GC analysis.

<sup>c</sup> Enantio- and diastereomeric excess values were determined by GC analysis using a chiral column after acetylation of the halohydrin obtained in the reaction crude with acetic anhydride and DMAP. The configuration of the major enantiomer of each isomer appears in parentheses. Change in the CIP priority.

**Table S12.** Screening of different ADHs for the asymmetric bioreduction of (*R*)-**2i**.<sup>a</sup>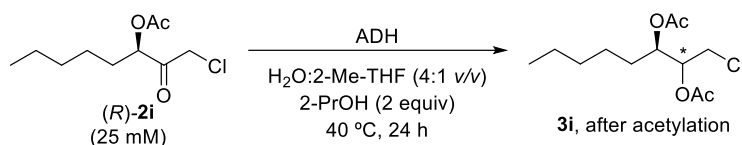

| Entry | ADH         | <b>3i</b> (%) <sup>b</sup> | <b>3i de</b> (%) <sup>c</sup> | <b>3i ee</b> (%) <sup>c</sup> |
|-------|-------------|----------------------------|-------------------------------|-------------------------------|
| 1     | ADH-A       | >99                        | >99 ( <i>anti</i> )           | >99 ( <i>2R,3R</i> )          |
| 2     | evo.1.1.200 | >99                        | >99 ( <i>syn</i> )            | >99 ( <i>2S,3R</i> )          |
| 3     | KRED-P1-A04 | >99                        | >99 ( <i>syn</i> )            | >99 ( <i>2S,3R</i> )          |
| 4     | KRED-P1-B02 | >99                        | >99 ( <i>syn</i> )            | >99 ( <i>2S,3R</i> )          |
| 5     | KRED-P2-B02 | >99                        | 96 ( <i>anti</i> )            | >99 ( <i>2R,3R</i> )          |
| 6     | KRED-P2-C02 | >99                        | 82 ( <i>anti</i> )            | >99 ( <i>2R,3R</i> )          |
| 7     | KRED-P2-G03 | >99                        | 38 ( <i>syn</i> )             | >99 ( <i>2S,3R</i> )          |

<sup>a</sup> Procedures already applied to ketone **2a** were used for the bioreduction of (*R*)-**2i** considering the mmol substrate/weight enzyme ratio.

<sup>b</sup> Product percentages were determined by GC analysis.

<sup>c</sup> Enantio- and diastereomeric excess values were determined by GC analysis using a chiral column after acetylation of the halohydrin obtained in the reaction crude with acetic anhydride and DMAP. The configuration of the major enantiomer of each isomer appears in parentheses. Change in the CIP priority.

**Table S13.** Screening of different ADHs for the asymmetric bioreduction of (*S*)-**2i**.<sup>a</sup>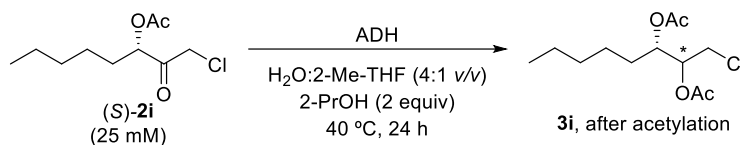

| Entry | ADH         | <b>3i</b> (%) <sup>b</sup> | <b>3i de</b> (%) <sup>c</sup> | <b>3i ee</b> (%) <sup>c</sup> |
|-------|-------------|----------------------------|-------------------------------|-------------------------------|
| 1     | ADH-A       | >99                        | >99 ( <i>syn</i> )            | >99 ( <i>2R,3S</i> )          |
| 2     | evo.1.1.200 | >99                        | >99 ( <i>anti</i> )           | >99 ( <i>2S,3S</i> )          |
| 3     | KRED-P1-A04 | >99                        | >99 ( <i>anti</i> )           | >99 ( <i>2S,3S</i> )          |
| 4     | KRED-P1-B02 | >99                        | >99 ( <i>anti</i> )           | >99 ( <i>2S,3S</i> )          |
| 5     | KRED-P2-B02 | >99                        | 94 ( <i>syn</i> )             | >99 ( <i>2R,3S</i> )          |
| 6     | KRED-P2-C02 | >99                        | 62 ( <i>syn</i> )             | >99 ( <i>2R,3S</i> )          |
| 7     | KRED-P2-G03 | >99                        | 94 ( <i>anti</i> )            | >99 ( <i>2S,3S</i> )          |

<sup>a</sup> Procedures already applied to ketone **2a** were used for the bioreduction of (*S*)-**2i** considering the mmol substrate/weight enzyme ratio.

<sup>b</sup> Product percentages were determined by GC analysis.

<sup>c</sup> Enantio- and diastereomeric excess values were determined by GC analysis using a chiral column after acetylation of the halohydrin obtained in the reaction crude with acetic anhydride and DMAP. The configuration of the major enantiomer of each isomer appears in parentheses. Change in the CIP priority.

## VII. Optimization of the one-pot hydration-bioreduction cascade starting from alkyne **1a**

**Table S14.** Optimization of the hydration-bioreduction cascade starting from **1a**.

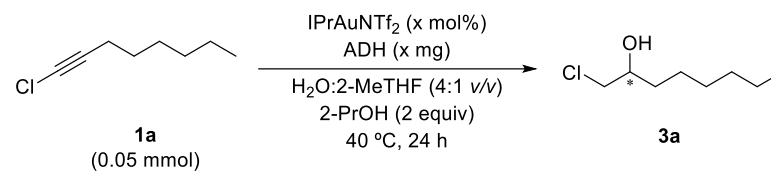

| Entry | Enzyme (mg)            | IPrAuNTf <sub>2</sub> (mol%) | Vessel <sup>a</sup> | Concentration (mM) | Stirring             | <b>1a</b> (%) <sup>a</sup> | <b>2a</b> (%) <sup>b</sup> | By-products (%) <sup>b</sup> | <b>3a</b> (%) <sup>b</sup> | <b>3a ee</b> (%) <sup>c</sup> |
|-------|------------------------|------------------------------|---------------------|--------------------|----------------------|----------------------------|----------------------------|------------------------------|----------------------------|-------------------------------|
| 1     | ADH-A <sup>d</sup> (2) | 2                            | Vial                | 100                | Magnetic             | 69                         | <1                         | 3                            | 28                         | >99 ( <i>R</i> )              |
| 2     | ADH-A <sup>d</sup> (2) | 2                            | Vial                | 100                | 220 rpm <sup>e</sup> | 58                         | <1                         | 4                            | 38                         | >99 ( <i>R</i> )              |
| 3     | ADH-A <sup>d</sup> (2) | 2                            | Eppendorf           | 100                | 220 rpm <sup>e</sup> | 48                         | 1                          | 11                           | 40                         | >99 ( <i>R</i> )              |
| 4     | ADH-A <sup>d</sup> (2) | 5                            | Vial                | 100                | Magnetic             | 9                          | <1                         | 13                           | 78                         | >99 ( <i>R</i> )              |
| 5     | ADH-A <sup>d</sup> (2) | 6                            | Vial                | 100                | Magnetic             | <1                         | <1                         | 4                            | 96                         | >99 ( <i>R</i> )              |
| 6     | <i>Lb</i> ADH (10)     | 2                            | Vial                | 100                | Magnetic             | <1                         | <1                         | 10                           | 90                         | >99 ( <i>S</i> )              |
| 7     | <i>Lb</i> ADH (10)     | 2                            | Vial                | 100                | 220 rpm <sup>e</sup> | <1                         | <1                         | 7                            | 93                         | >99 ( <i>S</i> )              |
| 8     | <i>Lb</i> ADH (10)     | 6                            | Vial                | 100                | 220 rpm <sup>e</sup> | <1                         | <1                         | 2                            | 98                         | >99 ( <i>S</i> )              |
| 9     | KRED-P2-D11 (2)        | 2                            | Vial                | 100                | Magnetic             | 34                         | <1                         | 9                            | 57                         | >99 ( <i>S</i> )              |
| 10    | KRED-P2-D11 (2)        | 2                            | Vial                | 100                | 220 rpm <sup>e</sup> | 3                          | 30                         | 2                            | 65                         | >99 ( <i>S</i> )              |
| 11    | KRED-P2-D11 (2)        | 3                            | Vial                | 100                | 220 rpm <sup>e</sup> | 14                         | 1                          | 5                            | 80                         | >99 ( <i>S</i> )              |



**Table S14 continuation.**

| Entry | Enzyme (mg)      | IPrAuNTf <sub>2</sub><br>(mol%) | Vessel <sup>a</sup> | Concentration (mM) | Stirring             | <b>1a</b><br>(%) <sup>b</sup> | <b>2a</b><br>(%) <sup>b</sup> | By-products<br>(%) <sup>a</sup> | <b>3a</b><br>(%) <sup>b</sup> | <b>3a ee</b><br>(%) <sup>c</sup> |
|-------|------------------|---------------------------------|---------------------|--------------------|----------------------|-------------------------------|-------------------------------|---------------------------------|-------------------------------|----------------------------------|
| 12    | KRED-P2-D11 (2)  | 4                               | Vial                | 100                | 220 rpm <sup>e</sup> | <1                            | <1                            | 7                               | 93                            | >99 ( <i>S</i> )                 |
| 13    | KRED-P2-D11 (2)  | 5                               | Vial                | 100                | 220 rpm <sup>e</sup> | <1                            | <1                            | 8                               | 92                            | >99 ( <i>S</i> )                 |
| 14    | KRED-P2-D11 (2)  | 6                               | Vial                | 100                | 220 rpm <sup>e</sup> | <1                            | <1                            | 9                               | 91                            | >99 ( <i>S</i> )                 |
| 15    | KRED-P2-D11 (3)  | 4                               | Vial                | 100                | 220 rpm <sup>e</sup> | <1                            | 75                            | 9                               | 16                            | >99 ( <i>S</i> )                 |
| 16    | KRED-P2-D11 (5)  | 4                               | Vial                | 100                | 220 rpm <sup>e</sup> | <1                            | 16                            | 19                              | 65                            | >99 ( <i>S</i> )                 |
| 17    | KRED-P2-D11 (7)  | 4                               | Vial                | 100                | 220 rpm <sup>e</sup> | <1                            | <1                            | 7                               | 93                            | >99 ( <i>S</i> )                 |
| 18    | KRED-P2-D11 (7)  | 4                               | Vial                | 150                | 220 rpm <sup>c</sup> | <1                            | <1                            | 10                              | 90                            | >99 ( <i>S</i> )                 |
| 19    | KRED-P2-D11 (7)  | 4                               | Vial                | 200                | 220 rpm <sup>e</sup> | <1                            | <1                            | 13                              | 87                            | >99 ( <i>S</i> )                 |
| 20    | KRED-P2-D11 (10) | 4                               | Vial                | 100                | 220 rpm <sup>e</sup> | <1                            | <1                            | 7                               | 93                            | >99 ( <i>S</i> )                 |

<sup>a</sup> Vial: glass vial (19 x 130 x 3 mm). Eppendorf (1.5 mL).

<sup>b</sup> Product percentages were determined by GC analysis.

<sup>c</sup> Enantiomeric excess values were determined by GC analysis using a chiral column after acetylation of the halohydrin obtained in the reaction crude with acetic anhydride and DMAP. The configuration of the major enantiomer appears in parentheses.

<sup>d</sup> ADH-A semi-purified by heat treatment.

<sup>e</sup> Orbital shaking.

### VIII. Scope of the one-pot cascade process

**Table S15.** Scope of the concurrent cascade via gold-catalyzed hydration and stereoselective bioreduction of alkynes **1a-i**.

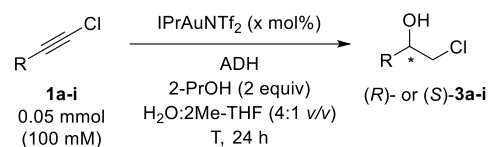

| Entry | Compound  | R                                                 | Enzyme        | Stirring             | T (°C) | IPrAuNTf <sub>2</sub> (mol%) | <b>1</b> (%) <sup>a</sup> | <b>2</b> (%) <sup>a</sup> | By-products (%) <sup>a</sup> | <b>3</b> (%) <sup>a</sup> | <b>3 ee</b> (%) <sup>b</sup> |
|-------|-----------|---------------------------------------------------|---------------|----------------------|--------|------------------------------|---------------------------|---------------------------|------------------------------|---------------------------|------------------------------|
| 1     | <b>1a</b> | C <sub>6</sub> H <sub>13</sub>                    | ADH-A         | Magnetic             | 40     | 6                            | <1                        | <1                        | 4                            | 96                        | >99 ( <i>R</i> )             |
| 2     | <b>1a</b> | C <sub>6</sub> H <sub>13</sub>                    | <i>Lb</i> ADH | 220 rpm <sup>c</sup> | 40     | 6                            | <1                        | <1                        | 2                            | 98                        | >99 ( <i>S</i> )             |
| 3     | <b>1b</b> | C <sub>8</sub> H <sub>17</sub>                    | ADH-A         | Magnetic             | 40     | 5                            | <1                        | 9                         | 10                           | 81                        | >99 ( <i>R</i> )             |
| 4     | <b>1b</b> | C <sub>8</sub> H <sub>17</sub>                    | <i>Lb</i> ADH | 220 rpm <sup>c</sup> | 40     | 5                            | <1                        | <1                        | 7                            | 93                        | >99 ( <i>S</i> )             |
| 5     | <b>1c</b> | Cy                                                | <i>Lb</i> ADH | 220 rpm <sup>c</sup> | 40     | 5                            | <1                        | <1                        | 18                           | 82                        | >99 ( <i>S</i> )             |
| 6     | <b>1d</b> | PhCH <sub>2</sub> CH <sub>2</sub>                 | ADH-T         | Magnetic             | 40     | 5                            | <1                        | <1                        | <1                           | >99                       | >99 ( <i>R</i> )             |
| 7     | <b>1d</b> | PhCH <sub>2</sub> CH <sub>2</sub>                 | <i>Lb</i> ADH | 220 rpm <sup>c</sup> | 40     | 5                            | <1                        | <1                        | <1                           | >99                       | >99 ( <i>S</i> )             |
| 8     | <b>1e</b> | EtO <sub>2</sub> C(CH <sub>2</sub> ) <sub>4</sub> | ADH-A         | Magnetic             | 40     | 5                            | <1                        | 2                         | <1                           | 98                        | >99 ( <i>R</i> )             |
| 9     | <b>1e</b> | EtO <sub>2</sub> C(CH <sub>2</sub> ) <sub>4</sub> | <i>Lb</i> ADH | 220 rpm <sup>c</sup> | 40     | 5                            | <1                        | 9                         | <1                           | 91                        | >99 ( <i>S</i> )             |
| 10    | <b>1f</b> | BnOCH <sub>2</sub>                                | ADH-A         | Magnetic             | 45     | 7.5                          | <1                        | <1                        | 40                           | 60                        | >99 ( <i>R</i> )             |
| 11    | <b>1f</b> | BnOCH <sub>2</sub>                                | <i>Lb</i> ADH | 220 rpm <sup>c</sup> | 45     | 7.5                          | 19                        | 5                         | <1                           | 76                        | >99 ( <i>S</i> )             |

**Table S15 continuation.**

| Entry | Compound                | R                                                                                          | Enzyme        | Stirring             | T (°C) | IPrAuNTf <sub>2</sub><br>(mol%) | <b>1</b><br>(%) <sup>a</sup> | <b>2</b><br>(%) <sup>a</sup> | By-<br>products<br>(%) <sup>a</sup> | <b>3</b><br>(%) <sup>a</sup> | <b>3 ee (%)</b> <sup>b</sup>                                   |
|-------|-------------------------|--------------------------------------------------------------------------------------------|---------------|----------------------|--------|---------------------------------|------------------------------|------------------------------|-------------------------------------|------------------------------|----------------------------------------------------------------|
| 12    | <b>1g</b>               | TsO(CH <sub>2</sub> ) <sub>4</sub>                                                         | ADH-A         | Magnetic             | 40     | 5                               | <1                           | 40                           | <1                                  | 60                           | >99 ( <i>R</i> )                                               |
| 13    | <b>1g</b>               | TsO(CH <sub>2</sub> ) <sub>4</sub>                                                         | <i>Lb</i> ADH | 220 rpm <sup>c</sup> | 40     | 5                               | <1                           | <1                           | <1                                  | >99                          | >99 ( <i>S</i> )                                               |
| 14    | <b>1h<sup>d</sup></b>   | (CH <sub>3</sub> ) <sub>2</sub> C=CH(CH <sub>2</sub> ) <sub>2</sub> (CH <sub>3</sub> )C=CH | <i>Lb</i> ADH | 220 rpm <sup>c</sup> | 40     | 5                               | <1                           | 6                            | <1                                  | 94                           | >99 ( <i>S</i> )                                               |
| 15    | ( <i>R</i> )- <b>1i</b> | H <sub>3</sub> C(CH <sub>2</sub> ) <sub>4</sub> CH(OAc)                                    | KRED-P2-B02   | 220 rpm <sup>c</sup> | 40     | 5                               | <1                           | <1                           | <1                                  | >99                          | 96% <i>de</i> ,<br>>99 <i>ee</i><br>(2 <i>R</i> ,3 <i>R</i> )  |
| 16    | ( <i>R</i> )- <b>1i</b> | H <sub>3</sub> C(CH <sub>2</sub> ) <sub>4</sub> CH(OAc)                                    | evo.1.1.200   | Magnetic             | 40     | 5                               | <1                           | <1                           | <1                                  | >99                          | >99% <i>de</i> ,<br>>99 <i>ee</i><br>(2 <i>S</i> ,3 <i>R</i> ) |
| 17    | ( <i>S</i> )- <b>1i</b> | H <sub>3</sub> C(CH <sub>2</sub> ) <sub>4</sub> CH(OAc)                                    | KRED-P2-B02   | 220 rpm <sup>c</sup> | 40     | 5                               | <1                           | 2                            | <1                                  | 98                           | >99% <i>de</i> ,<br>>99 <i>ee</i><br>(2 <i>R</i> ,3 <i>S</i> ) |
| 18    | ( <i>S</i> )- <b>1i</b> | H <sub>3</sub> C(CH <sub>2</sub> ) <sub>4</sub> CH(OAc)                                    | evo.1.1.200   | Magnetic             | 40     | 5                               | <1                           | <1                           | <1                                  | >99                          | >99% <i>de</i> ,<br>>99 <i>ee</i><br>(2 <i>S</i> ,3 <i>S</i> ) |

<sup>a</sup> Product percentages were determined by GC analysis.

<sup>b</sup> Enantiomeric excess values were determined by GC analysis using a chiral column after acetylation of the halohydrin obtained in the reaction crude with acetic anhydride and DMAP, except for alcohol **3d**, **3f** and **3g** where HPLC analyses were required.

<sup>c</sup> Orbital shaking.

<sup>d</sup> 10% *v/v* of 2-PrOH was employed.

## IX. Scale-up of the one-pot cascade hydration-bioreduction processes

**Table S16.** Scale-up of the one-pot cascade hydration-bioreduction processes.

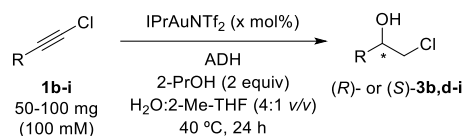

| Entry | Compound                | R                                                                                          | Amount of alkyne (mg) | Enzyme        | Stirring             | T (°C) | IPrAuNTf <sub>2</sub> (mol%) | <b>3</b> (%) <sup>a</sup> | <b>3 ee</b> (%) <sup>b</sup>                             |
|-------|-------------------------|--------------------------------------------------------------------------------------------|-----------------------|---------------|----------------------|--------|------------------------------|---------------------------|----------------------------------------------------------|
| 1     | <b>1b</b>               | C <sub>8</sub> H <sub>17</sub>                                                             | 100                   | ADH-A         | Magnetic             | 40     | 5                            | 72                        | >99 ( <i>R</i> )                                         |
| 2     | <b>1b</b>               | C <sub>8</sub> H <sub>17</sub>                                                             | 100                   | <i>Lb</i> ADH | 220 rpm <sup>c</sup> | 40     | 5                            | 86                        | >99 ( <i>S</i> )                                         |
| 3     | <b>1c</b>               | Cy                                                                                         | 50                    | <i>Lb</i> ADH | 220 rpm <sup>c</sup> | 40     | 5                            | 73                        | >99 ( <i>S</i> )                                         |
| 4     | <b>1d</b>               | PhCH <sub>2</sub> CH <sub>2</sub>                                                          | 50                    | <i>Lb</i> ADH | 220 rpm <sup>c</sup> | 40     | 5                            | 88                        | >99 ( <i>S</i> )                                         |
| 5     | <b>1e</b>               | EtO <sub>2</sub> C(CH <sub>2</sub> ) <sub>4</sub>                                          | 50                    | ADH-A         | Magnetic             | 40     | 5                            | 81                        | >99 ( <i>R</i> )                                         |
| 6     | <b>1f</b>               | BnOCH <sub>2</sub>                                                                         | 100                   | <i>Lb</i> ADH | 220 rpm <sup>c</sup> | 45     | 7.5                          | 63                        | >99 ( <i>S</i> )                                         |
| 7     | <b>1g</b>               | TsO(CH <sub>2</sub> ) <sub>4</sub>                                                         | 50                    | <i>Lb</i> ADH | 220 rpm <sup>c</sup> | 40     | 5                            | 87                        | >99 ( <i>S</i> )                                         |
| 8     | <b>1h</b> <sup>d</sup>  | (CH <sub>3</sub> ) <sub>2</sub> C=CH(CH <sub>2</sub> ) <sub>2</sub> (CH <sub>3</sub> )C=CH | 50                    | <i>Lb</i> ADH | 220 rpm <sup>c</sup> | 40     | 5                            | 75                        | >99 ( <i>S</i> )                                         |
| 9     | ( <i>R</i> )- <b>1i</b> | H <sub>3</sub> C(CH <sub>2</sub> ) <sub>4</sub> CH(OAc)                                    | 50                    | KRED-P2-B02   | 220 rpm <sup>c</sup> | 40     | 5                            | 83                        | 96% <i>de</i> , >99 <i>ee</i> (2 <i>R</i> ,3 <i>R</i> )  |
| 10    | ( <i>R</i> )- <b>1i</b> | H <sub>3</sub> C(CH <sub>2</sub> ) <sub>4</sub> CH(OAc)                                    | 50                    | evo.1.1.200   | Magnetic             | 40     | 5                            | 85                        | >99% <i>de</i> , >99 <i>ee</i> (2 <i>S</i> ,3 <i>R</i> ) |

<sup>a</sup> Isolated yields after chromatographic column.

<sup>b</sup> Enantio- and diastereomeric excess values were determined by GC analysis using a chiral column after acetylation of the halohydrin obtained in the reaction crude with acetic anhydride and DMAP, except for alcohol **3d**, **3f** and **3g** where HPLC analyses were required.

<sup>c</sup> Orbital stirring.

<sup>d</sup> 10% v/v of 2-PrOH was employed.

## X. Analytical data

### X.1. GC analyses for the determination of product percentages

An Agilent HP-1 (30 m x 0.32 mm x 0.25  $\mu$ m, 12.2 psi N<sub>2</sub>) or a DB-1701 column (30 m x 0.25 mm x 0.25  $\mu$ m, 12.2 psi N<sub>2</sub>) were used for the determination of the conversion values in the cascade and sequential protocols. The experimental conditions are indicated in Table S17.

**Table S17.** GC analytical conditions and retention times for the determination of conversion values.

| Entry | Substrate | Column  | Program <sup>a</sup>          | Retention time (min)                      |
|-------|-----------|---------|-------------------------------|-------------------------------------------|
| 1     | <b>1a</b> | HP-1    | 70/0/2/94/0/15/200/5          | 4.1                                       |
| 2     | <b>2a</b> | HP-1    | 70/0/2/94/0/15/200/5          | 8.4                                       |
| 3     | <b>3a</b> | HP-1    | 70/0/2/94/0/15/200/5          | 9.4                                       |
| 4     | <b>1b</b> | HP-1    | 70/0/2/94/0/15/200/5          | 10.8                                      |
| 5     | <b>2b</b> | HP-1    | 70/0/2/94/0/15/200/5          | 14.9                                      |
| 6     | <b>3b</b> | HP-1    | 70/0/2/94/0/15/200/5          | 15.6                                      |
| 7     | <b>1c</b> | HP-1    | 70/0/2/94/0/15/200/5          | 4.9                                       |
| 8     | <b>2c</b> | HP-1    | 70/0/2/94/0/15/200/5          | 9.9                                       |
| 9     | <b>3c</b> | HP-1    | 70/0/2/94/0/15/200/5          | 11.2                                      |
| 10    | <b>1e</b> | HP-1    | 70/0/2/94/0/15/200/5          | 12.4                                      |
| 11    | <b>2e</b> | HP-1    | 70/0/2/94/0/15/200/5          | 15.7                                      |
| 12    | <b>3e</b> | HP-1    | 70/0/2/94/0/15/200/5          | 16.2                                      |
| 13    | <b>1h</b> | DB-1701 | 70/0/5/100/2/1/130/2/20/200/1 | 18.4                                      |
| 14    | <b>2h</b> | DB-1701 | 70/0/5/100/2/1/130/2/20/200/1 | 37.5                                      |
| 15    | <b>3h</b> | DB-1701 | 70/0/5/100/2/1/130/2/20/200/1 | 38.8                                      |
| 16    | <b>1i</b> | HP-1    | 90/0/1/120/2/20/200/0         | 9.0                                       |
| 17    | <b>2i</b> | HP-1    | 90/0/1/120/2/20/200/0         | 16.1                                      |
| 18    | <b>3i</b> | HP-1    | 90/0/1/120/2/20/200/0         | 26.1 ( <i>anti</i> ); 27.3 ( <i>syn</i> ) |

<sup>a</sup> GC program: initial temp. (°C) / time (min) / ramp (°C/min) / temp. (°C) / time (min) / ramp (°C/min) / temp. (°C) / time (min) / ramp (°C/min) / final temp. (°C) / time (min).

## X.2. GC analyses for the determination of *ee* values of **1i**, **2i** and **3a-c,e,h,i**

Chiralsil Dex CB (30 m x 0.32 mm x 0.25  $\mu\text{m}$ , 12.2 psi N<sub>2</sub>) or Chirasil RtbDEXse (30 m x 0.25 mm x 0.25  $\mu\text{m}$ , 12.2 psi N<sub>2</sub>) was employed for the determination of the enantiomeric excess values of ester **1i**, keto ester **2i** and alcohols **3a-c,e,h,i** (Table S18).

**Table S18.** GC analyses for the determination of the *ee* values of keto ester **2i** and alcohols **3a-c,e,h,i**.

| Entry | Compound  | Column                | Program <sup>a</sup>      | Retention time (min) <sup>b</sup>               |                                                 |
|-------|-----------|-----------------------|---------------------------|-------------------------------------------------|-------------------------------------------------|
| 1     | <b>3a</b> | Chiralsil Dex CB      | 70/3/5/180/1              | 21.4 ( <i>R</i> )                               | 21.8 ( <i>S</i> )                               |
| 2     | <b>3b</b> | Chiralsil Dex CB      | 70/3/5/180/1              | 28.2 ( <i>R</i> )                               | 28.9 ( <i>S</i> )                               |
| 3     | <b>3c</b> | Chiralsil<br>RtbDEXse | 70/3/5/180/1              | 39.6 ( <i>R</i> )                               | 40.0 ( <i>S</i> )                               |
| 4     | <b>3e</b> | Chiralsil Dex CB      | 70/3/5/160/10/2/<br>180/5 | 30.2 ( <i>R</i> )                               | 30.9 ( <i>S</i> )                               |
| 5     | <b>3h</b> | Chiralsil Dex CB      | 70/3/5/180/1              | 24.6 ( <i>R</i> )                               | 24.7 ( <i>S</i> )                               |
| 6     | <b>1i</b> | Chiralsil Dex CB      | 70/3/5/180/1              | 35.0 ( <i>R</i> )                               | 35.2 ( <i>S</i> )                               |
| 7     | <b>2i</b> | Chiralsil Dex CB      | 70/3/5/180/1              | 22.0 ( <i>R</i> )                               | 22.2 ( <i>S</i> )                               |
| 8     | <b>3i</b> | Chiralsil Dex CB      | 70/3/5/180/1              | 24.2 ( <i>2R,3R</i> ),<br>24.3 ( <i>2S,3S</i> ) | 24.6 ( <i>2R,3S</i> ),<br>24.7 ( <i>2S,3R</i> ) |

<sup>a</sup> GC program: initial temp. (°C) / time (min) / ramp (°C/min) / temp. (°C) / time (min) / ramp (°C/min) / final temp. (°C) / time (min).

<sup>b</sup> Alcohols were *in situ* acetylated employing DMAP and acetic anhydride.

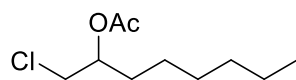

**3a**

Acetylated racemic alcohol **3a**

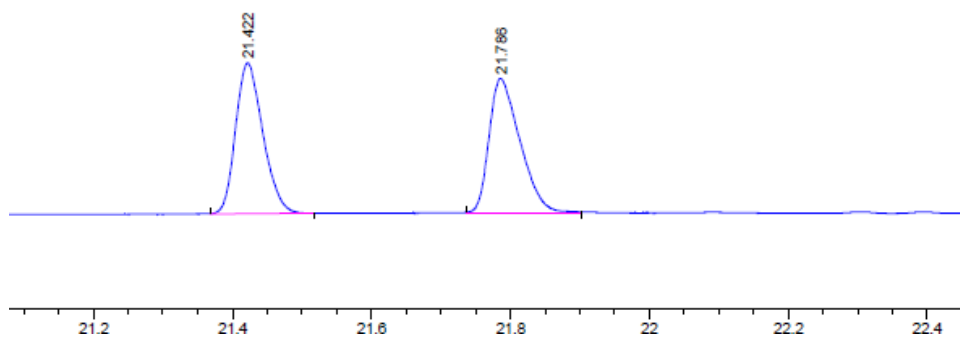

Acetylated alcohol (*S*)-**3a** in >99% *ee* (after bioreduction with *Lb*ADH)

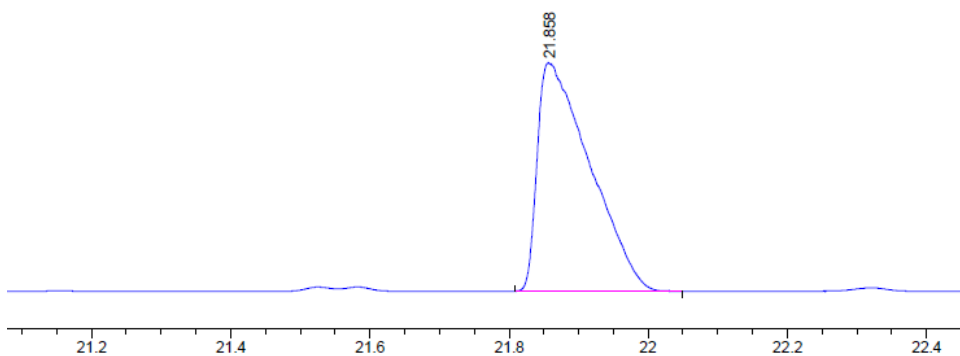

Acetylated alcohol (*R*)-**3a** in >99% *ee* (after bioreduction with ADH-A)

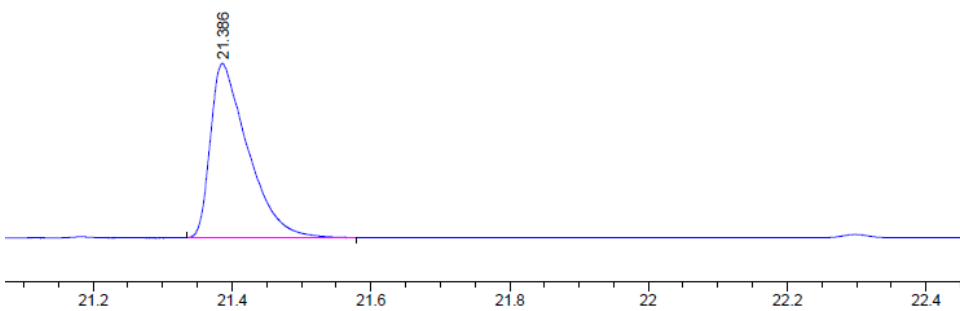

**Figure S4.** GC chromatograms of acetylated racemic halohydrin and optically active **3a** obtained using selective ADHs.

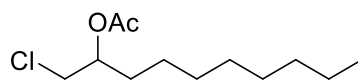

**3b**

Acetylated racemic alcohol **3b**

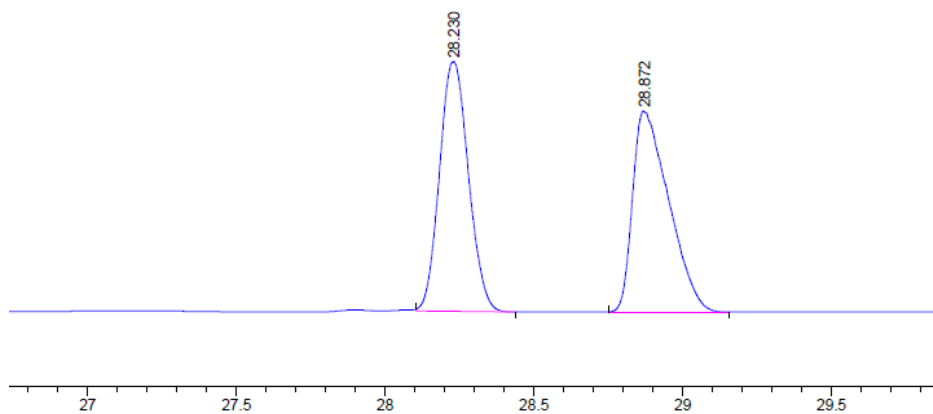

Acetylated alcohol (*S*)-**3b** in >99% *ee* (after bioreduction with *Lb*ADH)

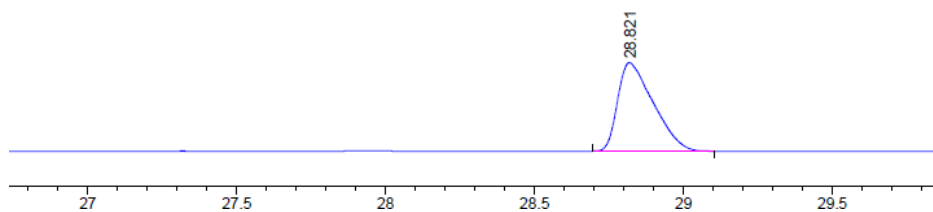

Acetylated alcohol (*R*)-**3b** in >99% *ee* (after bioreduction with ADH-A)

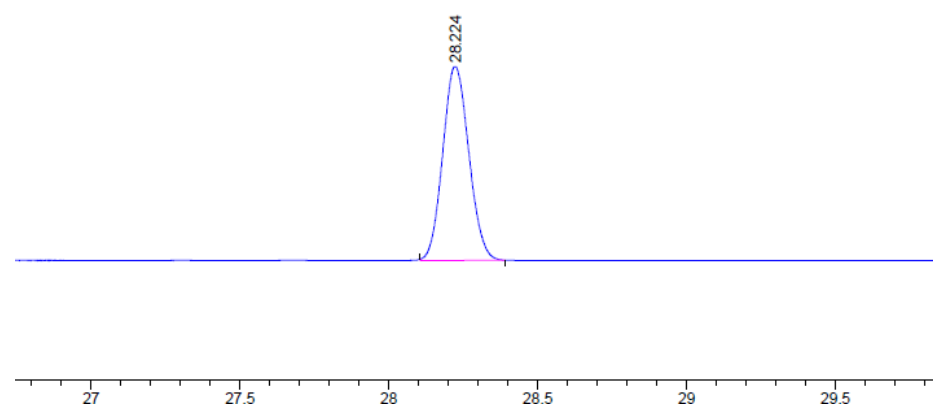

**Figure S5.** GC chromatograms of acetylated racemic halohydrin and optically active **3b** obtained using selective ADHs.



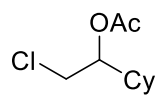

**3c**

Acetylated racemic alcohol **3c**

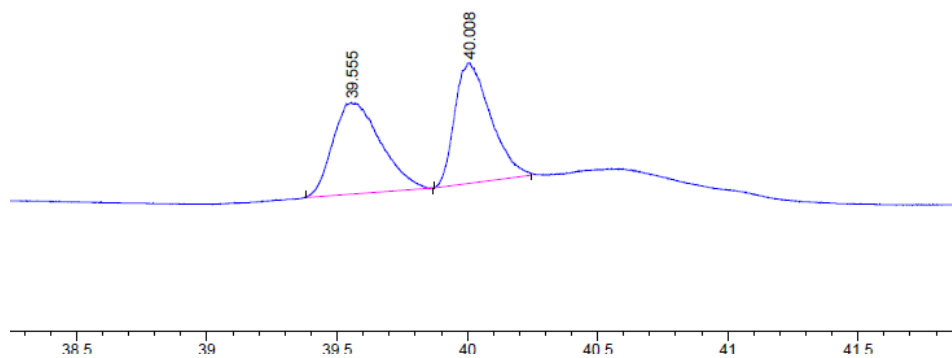

Acetylated alcohol (*S*)-**3c** in >99% *ee* (after bioreduction with *Lb*ADH)

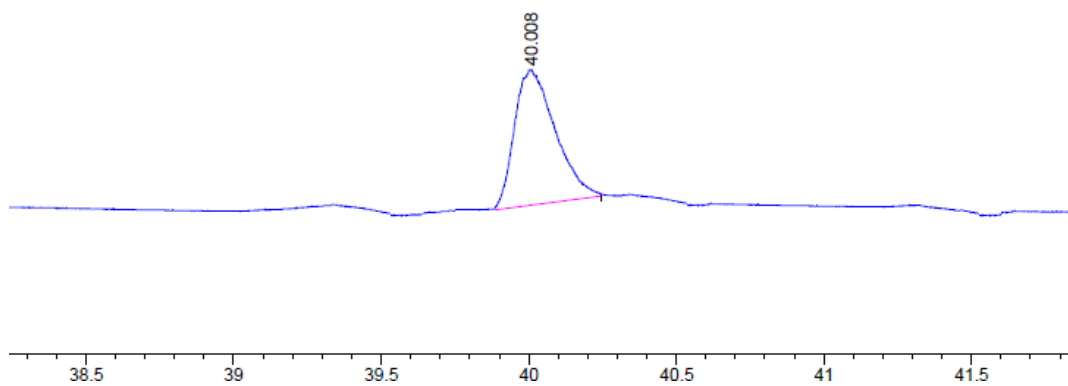

**Figure S6.** GC chromatograms of acetylated racemic halohydrin and optically active **3c** obtained using *Lb*ADH.

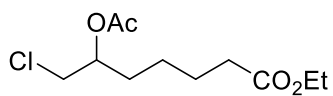

**3e**

Acetylated racemic alcohol **3e**

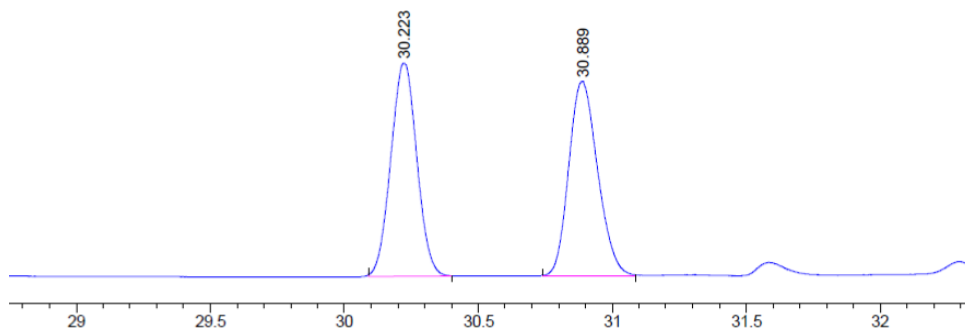

Acetylated alcohol (*S*)-**3e** in >99% *ee* (after bioreduction with *LbADH*)

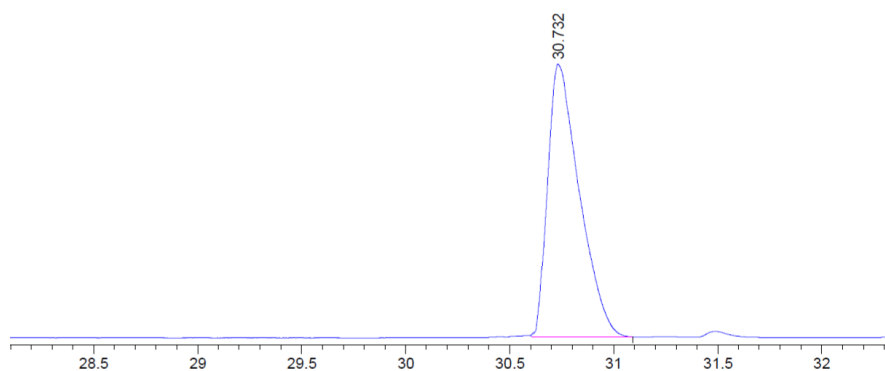

Acetylated alcohol (*R*)-**3e** in >99% *ee* (after bioreduction with ADH-A)

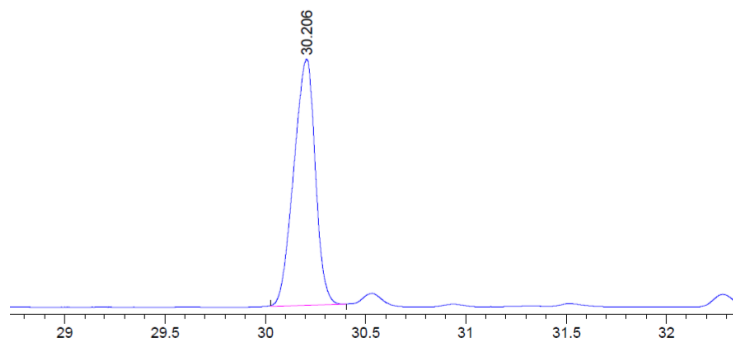

**Figure S7.** GC chromatograms of acetylated racemic halohydrin and optically active **3e** obtained using selective ADHs.

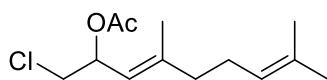

**3h**

Acetylated racemic alcohol **3h**

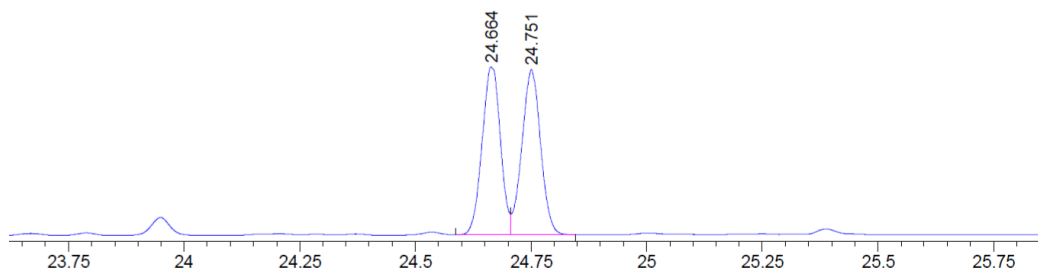

Acetylated alcohol (*S*)-**3h** in >99% *ee* (after bioreduction with *LbADH*)

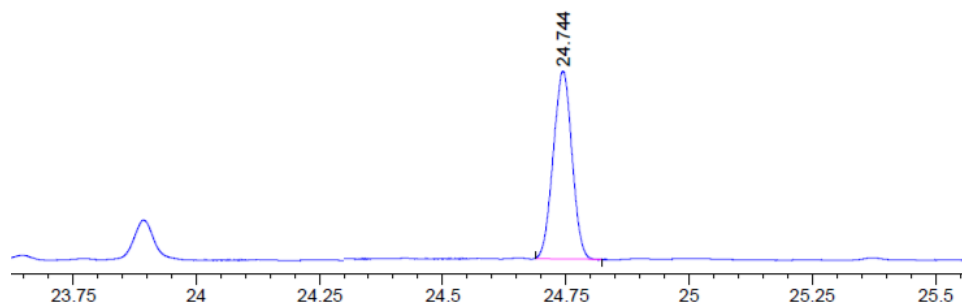

Acetylated alcohol (*R*)-**3h** in >99% *ee* (after bioreduction with ADH-A)

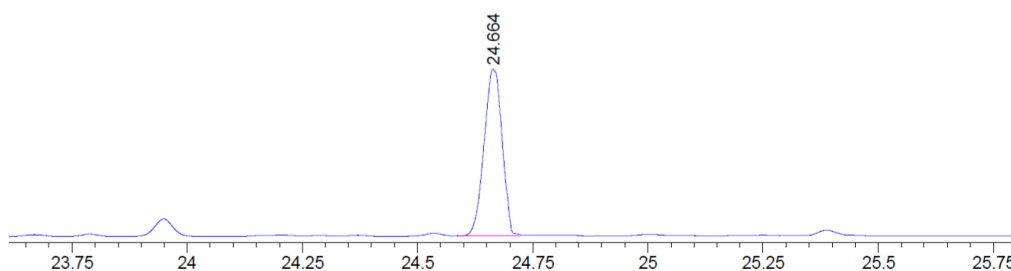

**Figure S8.** GC chromatograms of acetylated racemic halohydrin and optically active **3h** obtained using selective ADHs.

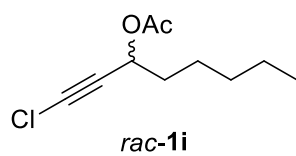

Acetylated racemic alcohol **1i**

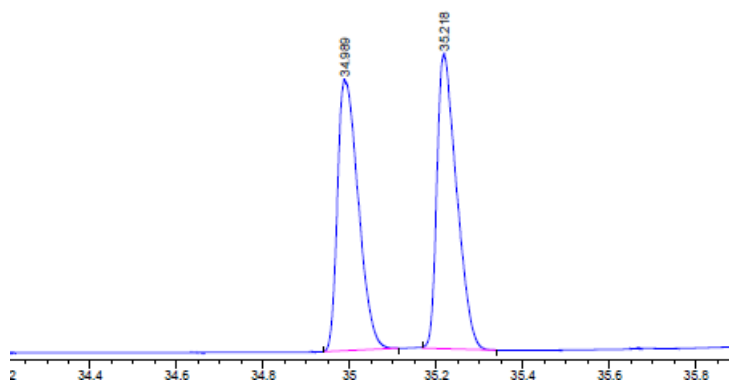

Acetylated alcohol (*S*)-**1i** in >99% *ee* (after kinetic resolution with CAL-B)

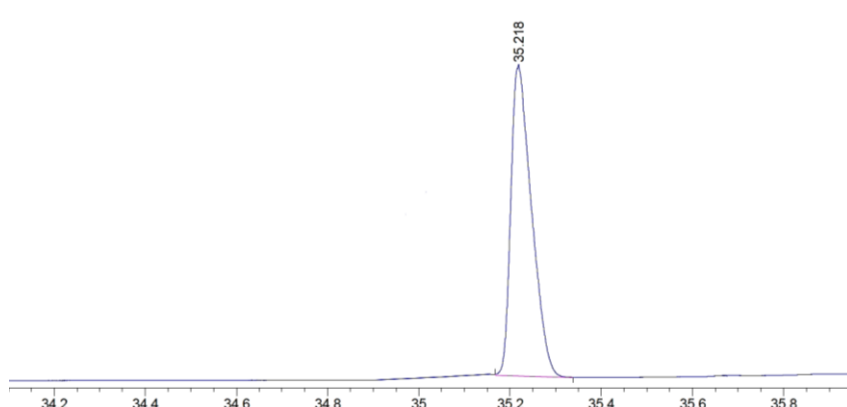

Acetylated alcohol (*R*)-**1i** in >99% *ee* (after kinetic resolution with CAL-B)

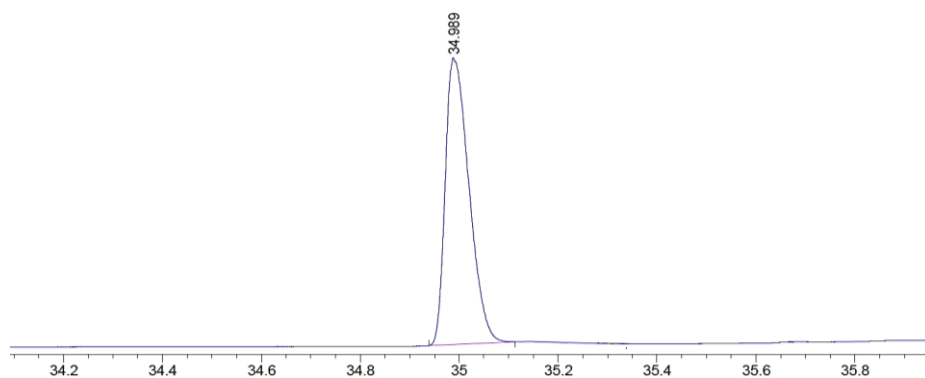

**Figure S9.** GC chromatograms of acetylated racemic alcohol and optically active **1i** obtained using selective CAL-B.

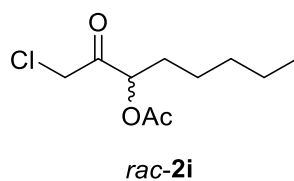

Acetylated racemic alcohol **2i**

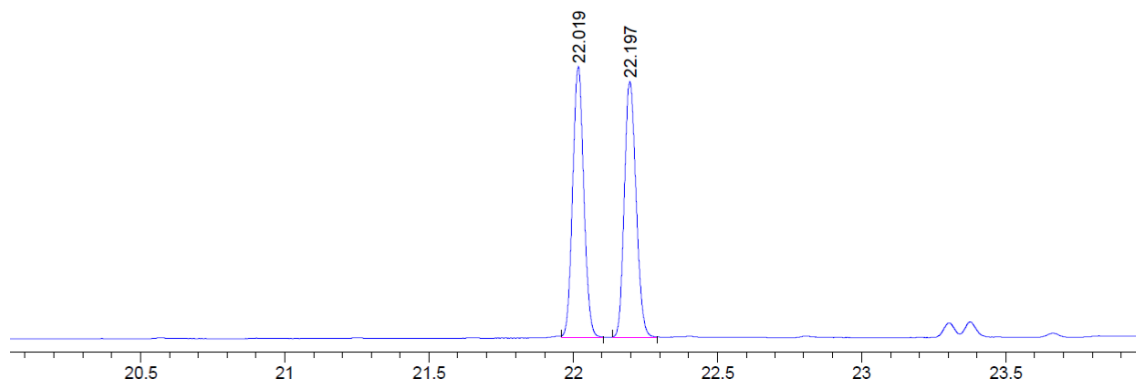

Acetylated alcohol (*S*)-**2i** in >99% *ee* (after kinetic resolution with CAL-B)

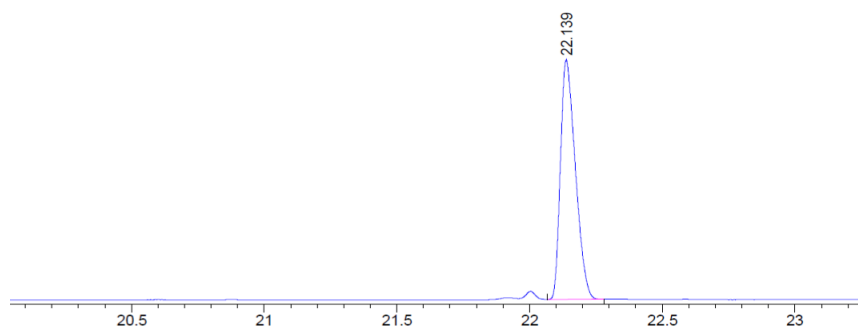

Acetylated alcohol (*R*)-**2i** in >99% *ee* (after kinetic resolution with CAL-B)

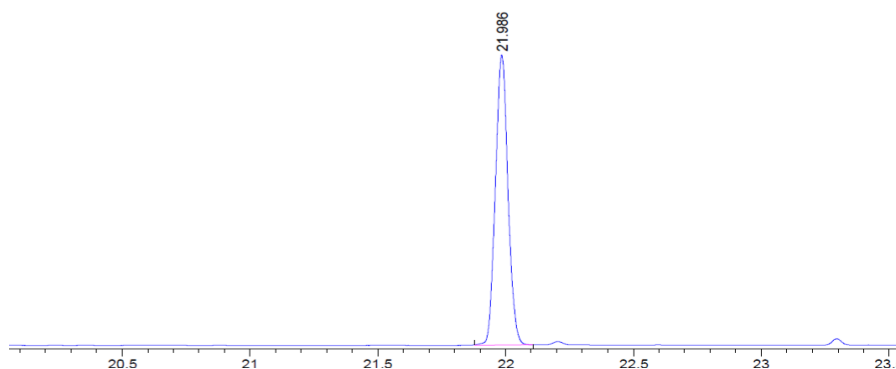

**Figure S10.** GC chromatograms of acetylated racemic halohydrin and optically active **2i** obtained using CAL-B.

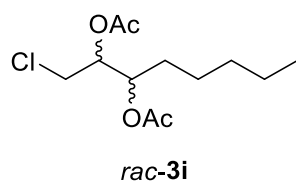

Diacetylated racemic diol **3i**

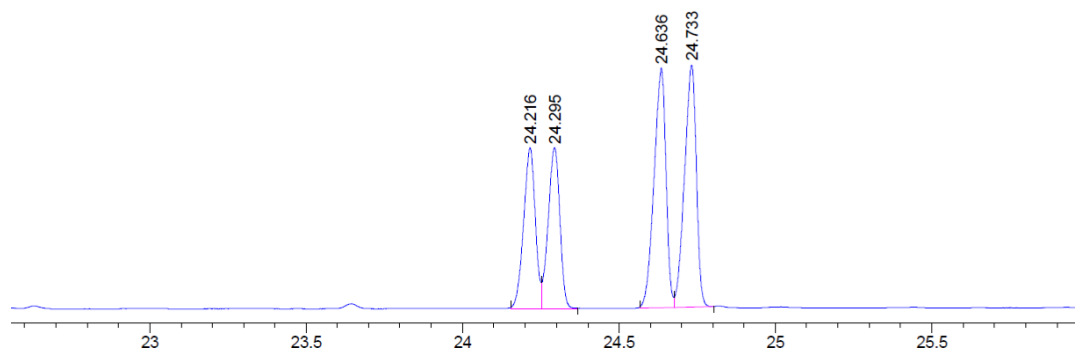

Diacetylated diol (*2R,3S*)-**3i** in >99% *de*, >99% *ee* (after bioreduction of (*S*)-**2i** with KRED-P2-B02)

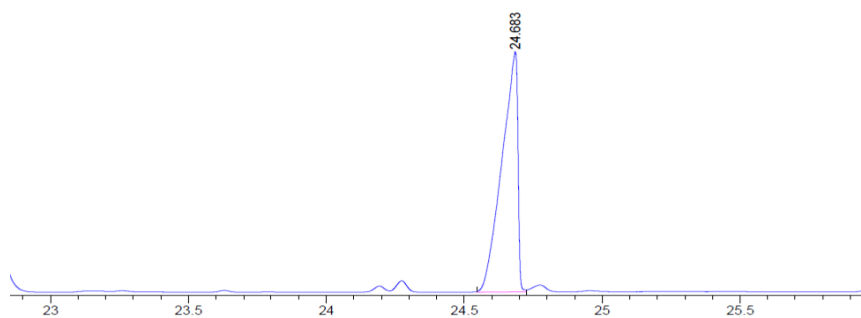

Diacetylated diol (*2R,3R*)-**3i** in >99% *de*, >99% *ee* (after bioreduction of (*R*)-**2i** with KRED-P2-B02)

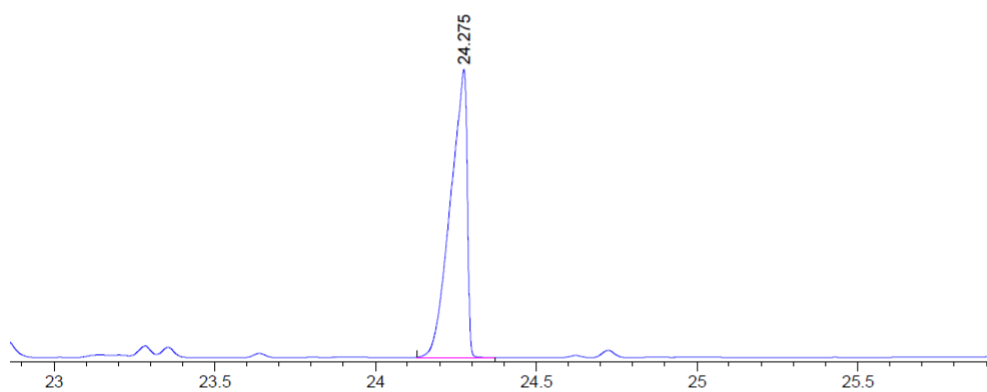

Diacetylated diol (2*S*,3*S*)-**3i** in >99% *de*, >99% *ee* (after bioreduction of (*S*)-**2i** with evo.1.1.200)

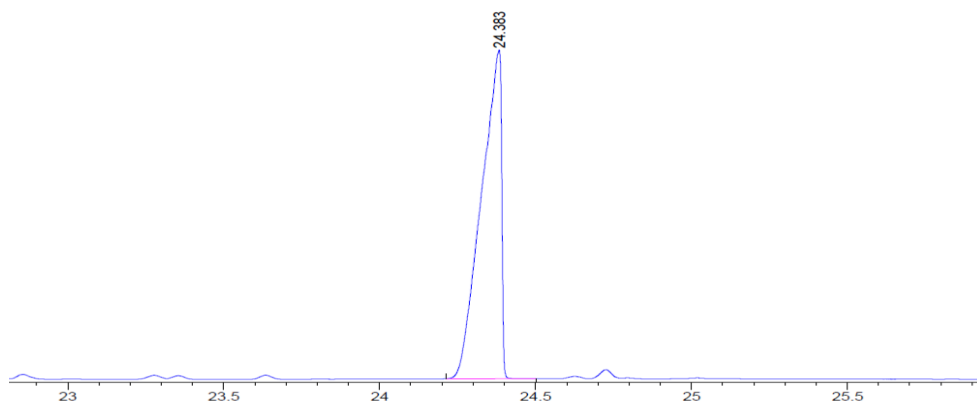

Diacetylated diol (2*S*,3*R*)-**3i** in 96% *de*, >99% *ee* (after bioreduction of (*R*)-**2i** with evo.1.1.200)

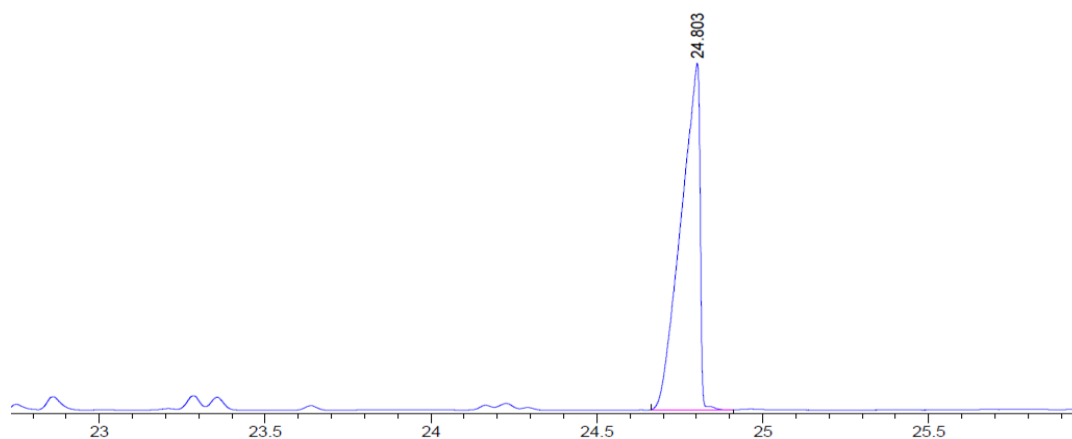

**Figure S11.** GC chromatograms of racemic and optically active diacetylated **3i** obtained using selective ADHs.

### ***X.3. HPLC analyses for the determination of product percentages and enantiomeric excess values in reactions towards 3d,f,g***

For the cascade and sequential approaches towards the synthesis of halohydrins **3d,f,g**, the determination of the conversion values and the enantiomeric excess values were performed through HPLC analyses using different columns and conditions as specified in the Experimental Section of the manuscript and in Table S19.

**Table S19.** HPLC analytical conditions and retention times of alcohols **3d,f-g** (temperature column: 30 °C).

| Entry | Compound  | Column         | Flow (mL/min) | <i>n</i> -Hexane/propan-2-ol (v/v) | Retention time (min)                 |
|-------|-----------|----------------|---------------|------------------------------------|--------------------------------------|
| 1     | <b>1d</b> | Chiralcel OD-H | 0.8           | 90:10                              | 11.0                                 |
| 2     | <b>2d</b> | Chiralcel OD-H | 0.8           | 90:10                              | 13.6                                 |
| 3     | <b>3d</b> | Chiralcel OD-H | 0.8           | 90:10                              | 8.8 ( <i>R</i> ), 11.4 ( <i>S</i> )  |
| 4     | <b>1f</b> | Chiralcel OD-H | 0.8           | 95:5                               | 16.3                                 |
| 5     | <b>2f</b> | Chiralcel OD-H | 0.8           | 95:5                               | 22.8                                 |
| 6     | <b>3f</b> | Chiralcel OD-H | 0.8           | 95:5                               | 14.5 ( <i>S</i> ), 17.3 ( <i>R</i> ) |
| 7     | <b>1g</b> | Chiralpak AD-H | 1.0           | 85:15                              | 6.4                                  |
| 8     | <b>2g</b> | Chiralpak AD-H | 1.0           | 85:15                              | 17.5                                 |
| 9     | <b>3g</b> | Chiralpak AD-H | 1.0           | 85:15                              | 21.8 ( <i>R</i> ), 22.5 ( <i>S</i> ) |



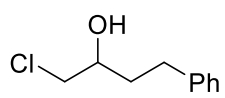

**3d**

HPLC separation for both enantiomers of racemic alcohol **3d**

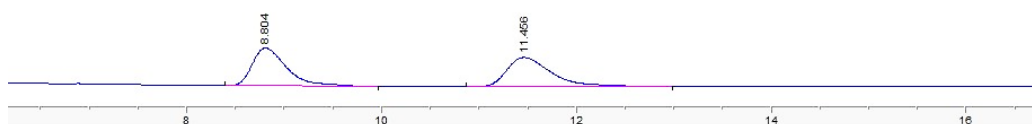

Alcohol (*S*)-**3d** in >99% *ee* (after bioreduction with *Lb*ADH)

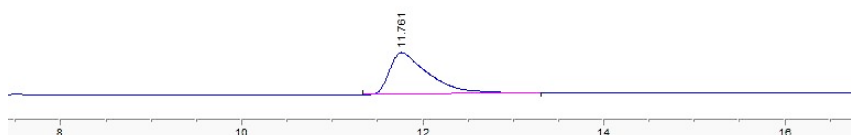

Alcohol (*R*)-**3d** in >99% *ee* (after bioreduction with ADH-T)

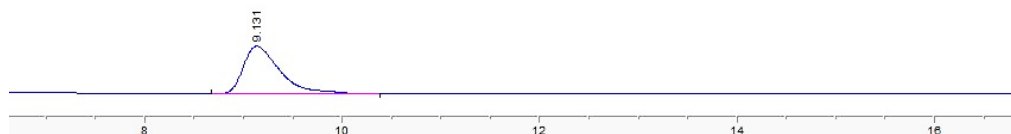

**Figure S12.** HPLC chromatograms of racemic halohydrin and optically active **3d** obtained using selective ADHs.

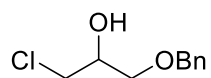

**3f**

HPLC separation for both enantiomers of racemic alcohol **3f**

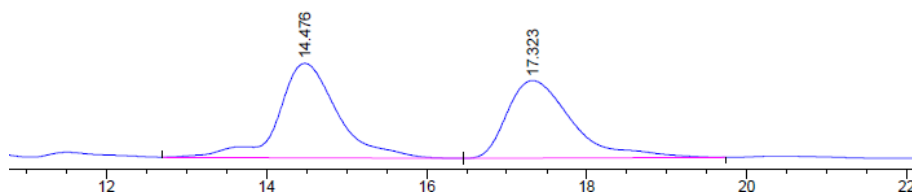

Alcohol (*S*)-**3f** in >99% *ee* (after bioreduction with *Lb*ADH)

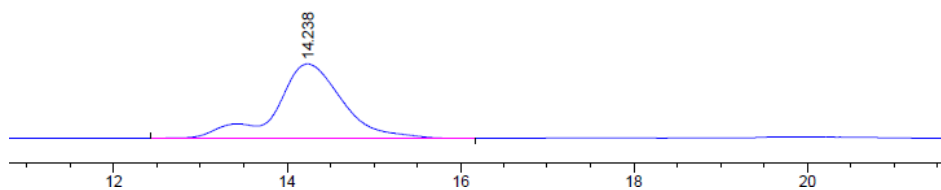

Alcohol (*R*)-**3f** in >99% *ee* (after bioreduction with ADH-A)

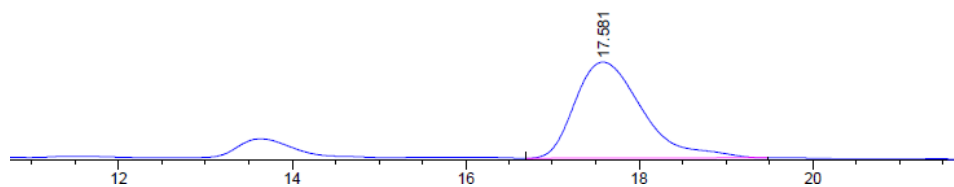

**Figure S13.** HPLC chromatograms of racemic halohydrin and optically active **3f** obtained using selective ADHs.

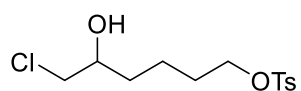

**3g**

HPLC separation for both enantiomers of racemic alcohol **3g**

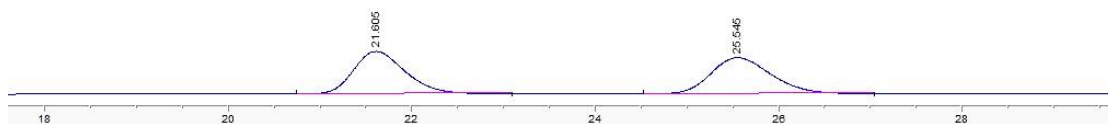

Alcohol (*S*)-**3g** in >99% *ee* (after bioreduction with *LbADH*)

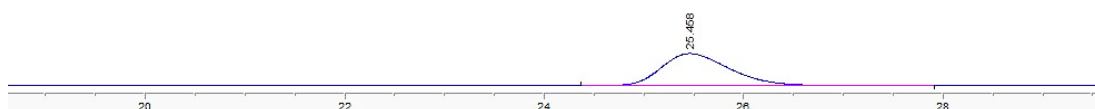

Alcohol (*R*)-**3g** in >99% *ee* (after bioreduction with ADH-A)

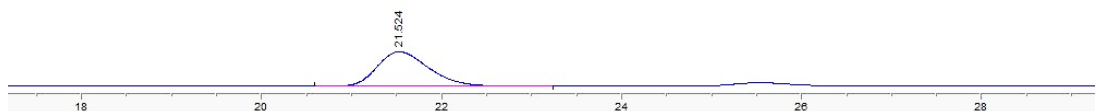

**Figure S14.** HPLC chromatograms of racemic halohydrin and optically active **3g** obtained using selective ADHs.

## XI. Optical rotation values of derivatives 3a-i obtained through the concurrent cascade approach

**Table S20.** Specific rotation of chiral halohydrins obtained through the gold(I)/ADH cascade.

| Entry | Enzyme        | Compound  | <i>ee</i> (%) <sup>a</sup>                                 | Experimental [ $\alpha$ ] <sub>D</sub> <sup>20</sup>  |
|-------|---------------|-----------|------------------------------------------------------------|-------------------------------------------------------|
| 1     | <i>Lb</i> ADH | <b>3a</b> | >99 ( <i>S</i> ) <sup>b</sup>                              | +2.4 ( <i>c</i> 1.0, CHCl <sub>3</sub> ) <sup>d</sup> |
| 2     | ADH-A         | <b>3a</b> | >99 ( <i>R</i> ) <sup>b</sup>                              | -3.5 ( <i>c</i> 1.0, CHCl <sub>3</sub> ) <sup>d</sup> |
| 3     | <i>Lb</i> ADH | <b>3b</b> | >99 ( <i>S</i> ) <sup>b</sup>                              | +27.0 ( <i>c</i> 1.0, CHCl <sub>3</sub> )             |
| 4     | ADH-A         | <b>3b</b> | >99 ( <i>R</i> ) <sup>b</sup>                              | -32.9 ( <i>c</i> 1.0, CHCl <sub>3</sub> )             |
| 5     | ADH-A         | <b>3c</b> | >99 ( <i>R</i> ) <sup>b</sup>                              | -6.5 ( <i>c</i> 1.0, CHCl <sub>3</sub> ) <sup>e</sup> |
| 6     | <i>Lb</i> ADH | <b>3d</b> | >99 ( <i>S</i> ) <sup>c</sup>                              | -8.7 ( <i>c</i> 1.0, CHCl <sub>3</sub> )              |
| 7     | ADH-A         | <b>3e</b> | >99 ( <i>R</i> ) <sup>b</sup>                              | +0.7 ( <i>c</i> 1.0, CHCl <sub>3</sub> )              |
| 8     | <i>Lb</i> ADH | <b>3f</b> | >99 ( <i>S</i> ) <sup>c</sup>                              | -1.6 ( <i>c</i> 1.0, CHCl <sub>3</sub> ) <sup>f</sup> |
| 9     | ADH-A         | <b>3f</b> | >99 ( <i>R</i> ) <sup>c</sup>                              | +1.4 ( <i>c</i> 1.0, CHCl <sub>3</sub> ) <sup>g</sup> |
| 10    | <i>Lb</i> ADH | <b>3g</b> | >99 ( <i>S</i> ) <sup>c</sup>                              | -78.2 ( <i>c</i> 1.0, CHCl <sub>3</sub> )             |
| 11    | <i>Lb</i> ADH | <b>3h</b> | >99 ( <i>S</i> ) <sup>b</sup>                              | -3.5 ( <i>c</i> 1.0, CHCl <sub>3</sub> )              |
| 12    | CAL-B         | <b>1i</b> | >99 ( <i>S</i> ) <sup>b</sup>                              | -91.1 ( <i>c</i> 1.0, CHCl <sub>3</sub> )             |
| 13    | CAL-B         | <b>2i</b> | >99 ( <i>R</i> ) <sup>b</sup>                              | +8.5 ( <i>c</i> 1.0, CHCl <sub>3</sub> )              |
| 14    | evo.1.1.200   | <b>3i</b> | <i>de</i> >99, <i>ee</i> >99 ( <i>2S,3R</i> ) <sup>b</sup> | +1.2 ( <i>c</i> 1.0, CHCl <sub>3</sub> )              |
| 15    | KRED-P2-B02   | <b>3i</b> | <i>de</i> 96, <i>ee</i> >99 ( <i>2R,3R</i> ) <sup>b</sup>  | +8.9 ( <i>c</i> 1.0, CHCl <sub>3</sub> )              |

<sup>a</sup> Absolute configuration of the compounds **3a-i** in parentheses.

<sup>b</sup> Enantiomeric excess values were measured by GC analysis.

<sup>c</sup> Enantiomeric excess values were measured by HPLC analysis.

<sup>d</sup> Optical rotation values were compared with those already described in the literature.<sup>14</sup>

<sup>e</sup> Optical rotation values were compared with those already described in the literature.<sup>16</sup>

<sup>f</sup> Optical rotation values were compared with those already described in the literature.<sup>20</sup>

<sup>g</sup> Optical rotation values were compared with those already described in the literature.<sup>21</sup>

## XII. Synthesis and characterization of epoxide **6i** to determine the absolute configuration of compound **3i**

Compound **6i** was synthesized through basic hydrolysis of diester (2*R*,3*S*)-**3i** with sodium methoxide in methanol (Scheme S9).

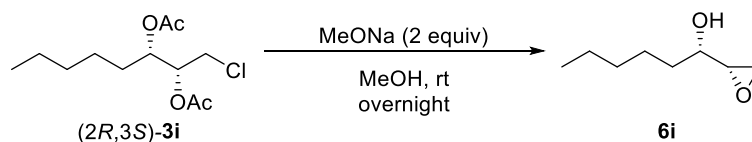

**Scheme S9.** Synthesis of epoxide **6i**.

Compound (2*R*,3*S*)-**3i** (60 mg, 0.23 mmol, 1 equiv) was dissolved in methanol (5 mL) and sodium methoxide (24.5 mg, 0.45 mmol, 2 equiv) was added and stirred overnight at rt. After this time, the reaction was quenched with H<sub>2</sub>O (5 mL) and the aqueous layer was extracted with Et<sub>2</sub>O (3 x 10 mL). The combined organic layers were dried over Na<sub>2</sub>SO<sub>4</sub>, filtered and concentrated in vacuum. Purification by column chromatography (SiO<sub>2</sub>, 80% Et<sub>2</sub>O/pentane), afforded the corresponding epoxide derivative **6i** (55 mg, 85% isolated yield). The spectroscopic data and the optical rotation of this compound matched with the ones already reported in the literature.<sup>22</sup>

**(S)-1-((S)-Oxiran-2-yl)hexan-1-ol (6i):** Colorless oil. R<sub>f</sub> (80% Et<sub>2</sub>O/pentane): 0.57. <sup>1</sup>H-NMR (300 MHz, CDCl<sub>3</sub>): δ 3.42 (*quint*, *J* = 5.6 Hz, 1H), 3.06–2.93 (*m*, 1H), 2.83 (*t*, *J* = 4.5 Hz, 1H), 2.72 (*dd*, *J* = 5.0, 2.8 Hz, 1H), 2.27 (*d*, *J* = 5.2 Hz, 1H), 1.68–1.13 (*m*, 8H), 0.90 (*t*, *J* = 6.6 Hz, 3H). <sup>13</sup>C-NMR (75 MHz, CDCl<sub>3</sub>): δ 72.2 (CH), 55.9 (CH), 45.6 (CH<sub>2</sub>), 34.7 (CH<sub>2</sub>), 32.2 (CH<sub>2</sub>), 25.4 (CH<sub>2</sub>), 22.9 (CH<sub>2</sub>), 14.4 (CH<sub>3</sub>). [α]<sub>D</sub><sup>20</sup> = +1.6 (1.0 *c*, CHCl<sub>3</sub>). Lit:<sup>20</sup> [α]<sub>D</sub><sup>26</sup> = +4.4 (0.1 *c*, CHCl<sub>3</sub>).

### XIII. Reference section

1. (a) S. Nicolai, R. Sedigh-Zadeh and J. Waser, Pd(0)-catalyzed alkene oxy- and aminoalkynylation with aliphatic bromoacetylenes, *J. Org. Chem.*, 2013, **78**, 3783; (b) J. T. Sarmiento, M. Cárcel, C. R. de Arellano, T. Varea, G. Asensio and A. Olmos, Straightforward synthesis of  $\alpha$ -chloromethylketimines catalyzed by gold(I). A clean way to building blocks, *J. Org. Chem.*, 2022, **87**, 3114.
2. Y.-B. Bai, Z. Luo, Y. Wang, J.-M. Gao and L. Zhang, Au-catalyzed intermolecular [2+2] cycloadditions between chloroalkynes and unactivated alkenes, *J. Am. Chem. Soc.*, 2018, **140**, 5860.
3. E. J. Corey and P. L. Fuchs, A synthetic method for formyl $\rightarrow$ ethynyl conversion (RCHO $\rightarrow$ RC $\equiv$ CH or RC $\equiv$ CR'), *Tetrahedron Lett.*, 1972, **13**, 3769.
4. M. Marx and T. T. Tidwell, Reactivity-selectivity in the Swern oxidation of alcohols using dimethyl sulfoxide-oxalyl chloride, *J. Org. Chem.*, 1984, **49**, 793.
5. R. Gauthier, M. Mamone and J.-F. Paquin, Gold-catalyzed hydrofluorination of internal alkynes using aqueous HF, *Org. Lett.*, 2019, **21**, 9024.
6. H. Murase, K. Senda, M. Senoo, T. Hata and H. Urabe, Rhodium-catalyzed intramolecular hydroarylation of 1-halo-1-alkynes: Regioselective synthesis of semihydrogenated aromatic heterocycles, *Chem. Eur. J.*, 2014, **20**, 317.
7. M. E. Maier and B. Schöffling, Intramolecular cycloadditions of mesoionic carbonyl ylides with alkynes. Synthesis of 5,6-dihydro-4H-cyclopenta- and 4,5,6,7-tetrahydrobenzo[b]furan derivatives, *Chem. Ber.*, 1989, **122**, 1081.
8. C. Zhu, J. L. Schwarz, S. Cembellín, S. Greßies and F. Glorius, Highly selective manganese(I)/Lewis acid cocatalyzed direct C-H propargylation using bromoallenes, *Angew. Chem. Int. Ed.*, 2018, **57**, 437.
9. S. González-Granda, L. Escot, I. Lavandera and V. Gotor-Fernández, Unmasking the hidden carbonyl group using gold(I) catalysts and alcohol dehydrogenases: Design of a thermodynamically-driven cascade toward optically active halohydrins, *ACS Catal.*, 2022, **12**, 2552.
10. L. Xie, Y. Wu, W. Yi, L. Zhu, J. Xiang and W. He, Gold-catalyzed hydration of haloalkynes to  $\alpha$ -halomethyl ketones, *J. Org. Chem.*, 2013, **78**, 9190.
11. W. He, L. Xie, Y. Xu, J. Xiang and L. Zhang, Electrophilicity of  $\alpha$ -oxo gold carbene intermediates: Halogen abstractions from halogenated solvents leading to the formation of chloro/bromomethyl ketones, *Org. Biomol. Chem.*, 2012, **10**, 3168.
12. I. M. Sakhautdinova and A. F. Mukhamet'yanova, Cycloaddition of bromo(chloro)methyl ketones and allenates of adipic acid monoesters to fullerene C<sub>60</sub>, *Russ. J. Gen. Chem.*, 2018, **88**, 2528.
13. S. Rendler, J. H. Schaezter, S. Hachisu, P. Maienfisch, T. Pitterna, O. Jacob and J. Y. Cassayre, Preparation of insecticidal triazinone derivatives, World patent, WO2013079350 A1, 2013.
14. T. M. Poessl, B. Kosjek, U. Ellmer, C. C. Gruber, K. Edegger, K. Faber, P. Hildebrandt, U. T. Bornscheuer and W. Kroutil, Non-racemic halohydrins *via* biocatalytic hydrogen-transfer reduction of halo-ketones and one-pot cascade reaction to enantiopure epoxides, *Adv. Synth. Catal.*, 2005, **347**, 1827.
15. A. Träff, K. Bogár, M. Warner and J.-E. Bäckvall. Highly efficient route for enantioselective preparation of chlorohydrins *via* dynamic kinetic resolution, *Org. Lett.*, 2008, **10**, 4807.

16. T. Ema, N. Ura, M. Yoshii, T. Korenaga and T. Sakai, Empirical method for predicting enantioselectivity in catalytic reactions: Demonstration with lipase and oxazaborolidine, *Tetrahedron*, 2009, **65**, 9583.
17. P. Kumar, M. Pandey, P. Gupta, S. V. Naidu and D. D. Dhavale, Enantio- and diastereocontrolled total synthesis of (+)-strictifolione, *Eur. J. Org. Chem.*, 2010, 6993.
18. Y. Toda, K. Tanaka, R. Matsuda, T. Sakamoto, S. Katsumi, M. Shimizu, F. Ito and H. Suga, A phosphonium ylide as a visible light organophotoredox catalyst, *Chem. Commun.*, 2021, **57**, 3591.
19. M. Lautens and M. L. Maddess, Chemoselective cross metathesis of bishomoallylic alcohols: Rapid access to fragment A of the cryptophycins, *Org. Lett.*, 2004, **6**, 1883.
20. A. R. Dar, M. A. Aga, B. Kumar, S. K. Yousuf and S. C. Taneja, Regioselective monochloro substitution in carbohydrates and non-sugar alcohols *via* Mitsunobu reaction: Applications in the synthesis of reboxetine, *Org. Biomol. Chem.*, 2013, **11**, 6195.
21. F. Sun, G. Xu, J. Wu and L. Yang, A new and facile preparation of *tert*-butyl (3*R*,5*S*)-6-hydroxy-3,5-*O*-isopropylidene-3,5-dihydroxyhexanoate, *Tetrahedron: Asymmetry*, 2007, **18**, 2454.
22. H. Jang, I. Shin, D. Lee, H. Kim and D. Kim, Stereoselective substrate-controlled asymmetric syntheses of both 2,5-*cis*- and 2,5-*trans*-tetrahydrofuranoid oxylipids: Stereodivergent intramolecular amide enolate alkylation, *Angew. Chem. Int. Ed.*, 2016, **55**, 6497.

# XIV. NMR spectra

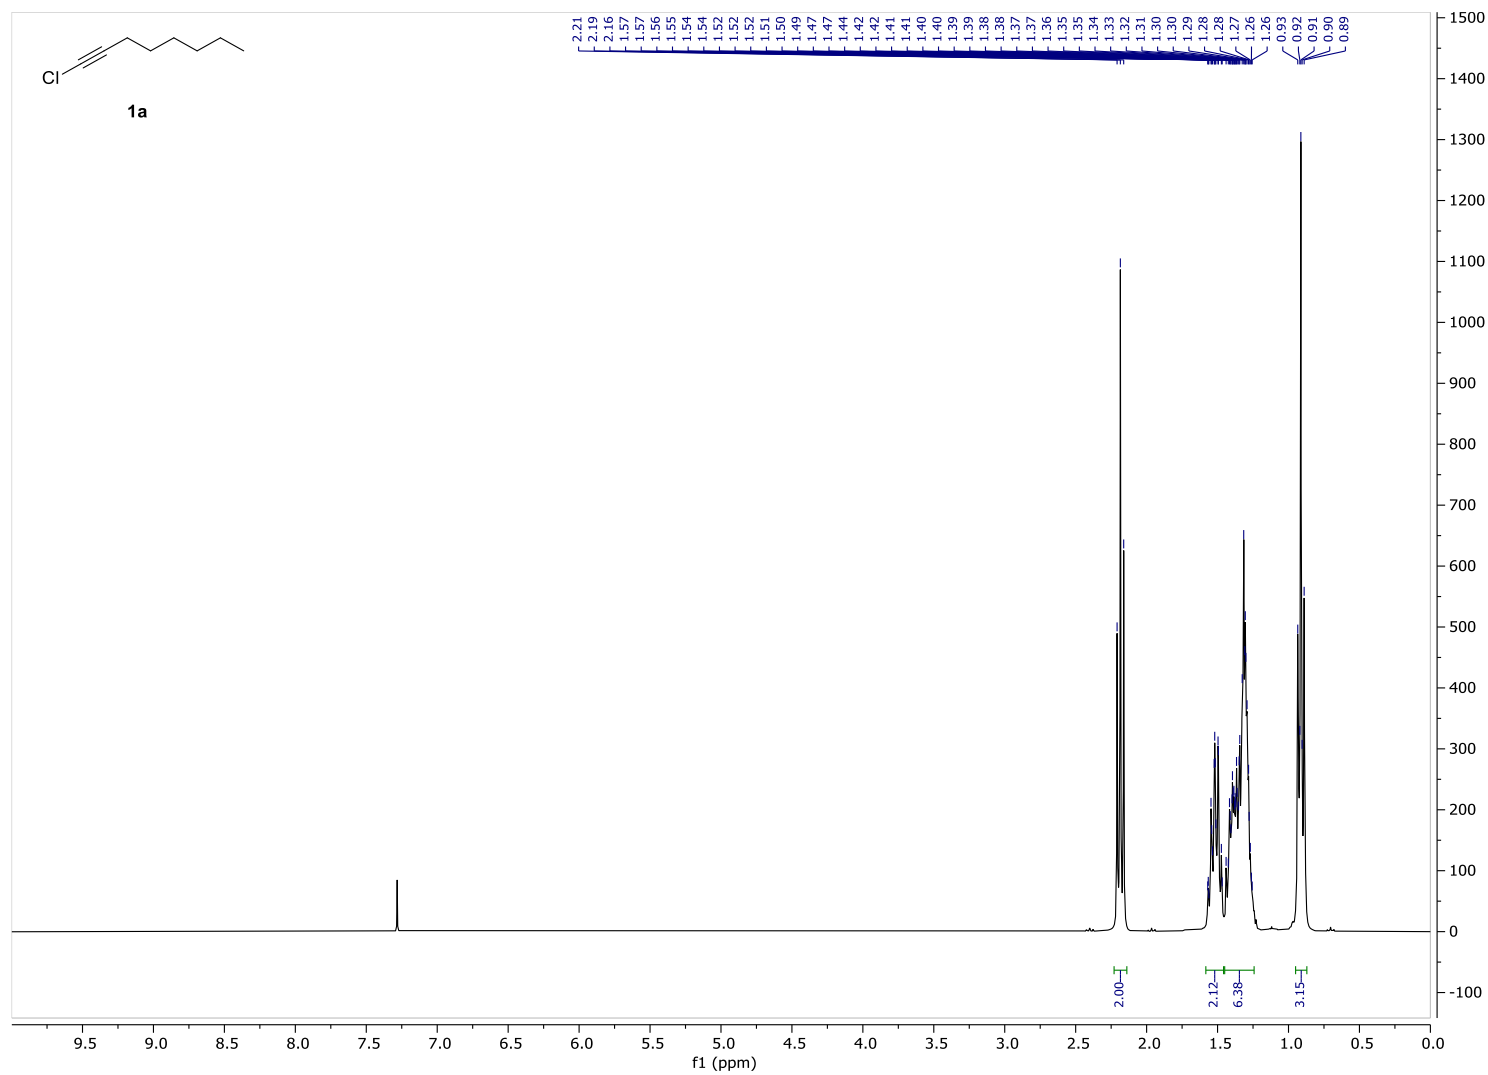

Figure S15.  $^1\text{H-NMR}$  spectrum ( $\text{CDCl}_3$ ) of compound **1a**.



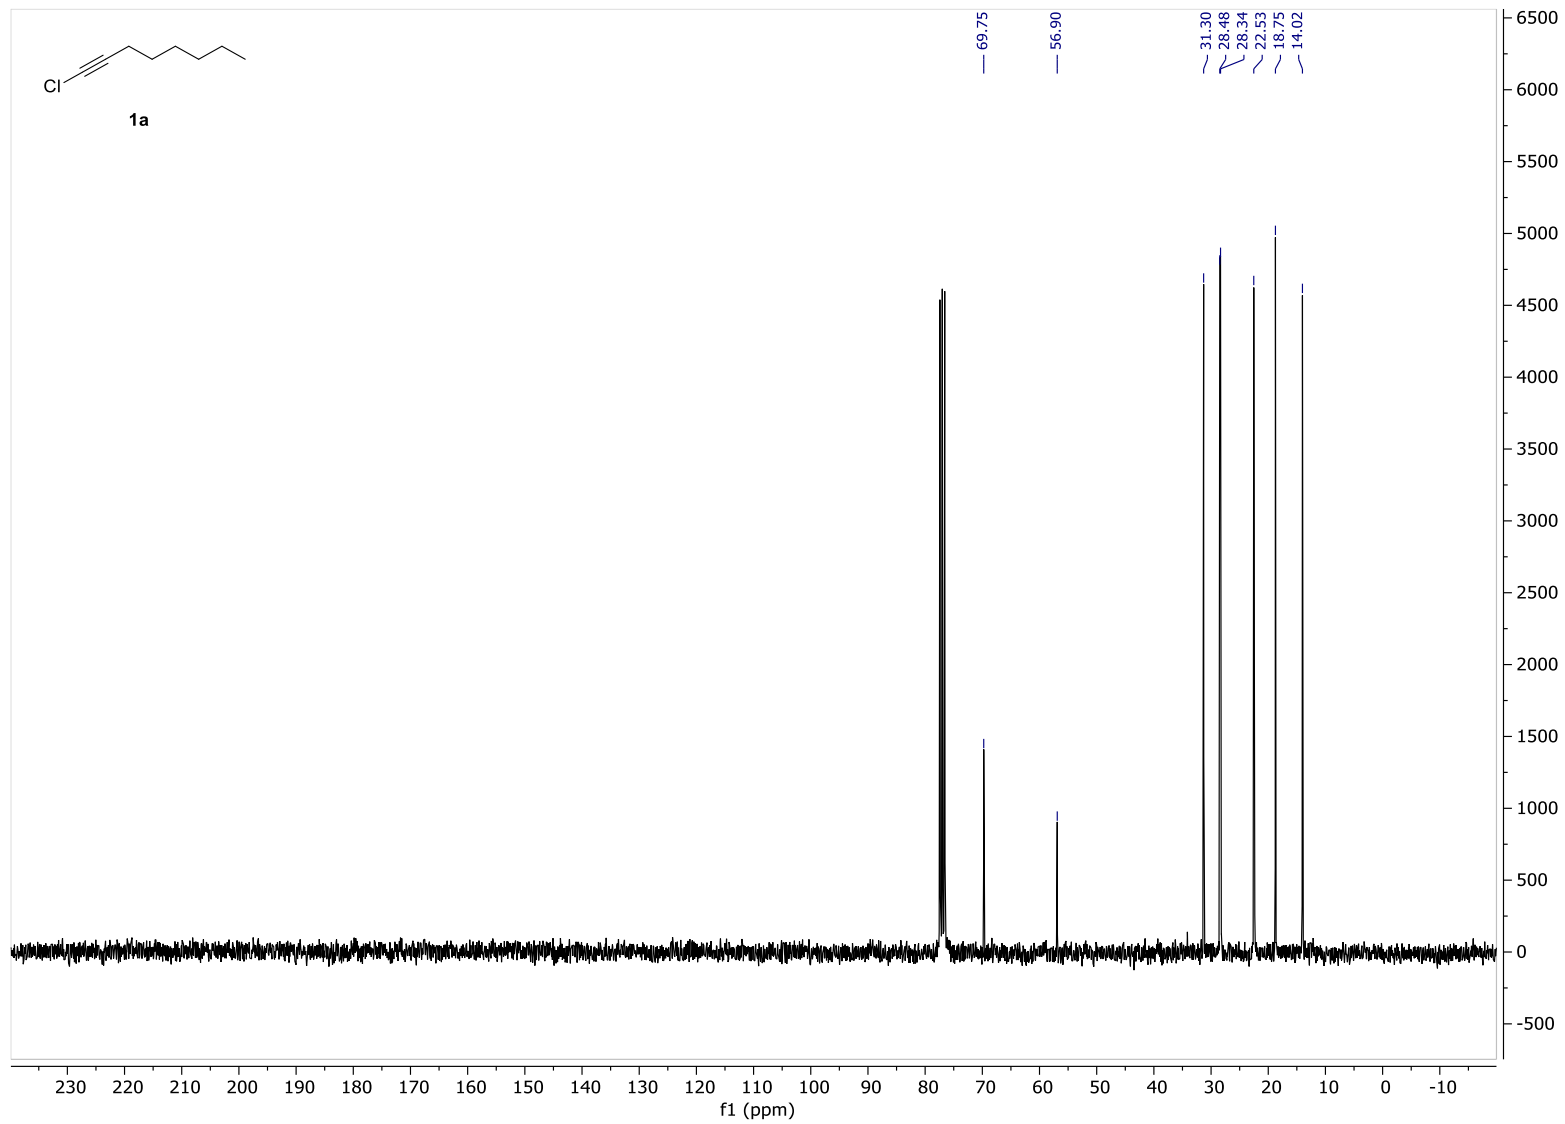

Figure S16.  $^{13}\text{C}$ -NMR spectrum ( $\text{CDCl}_3$ ) of compound **1a**.

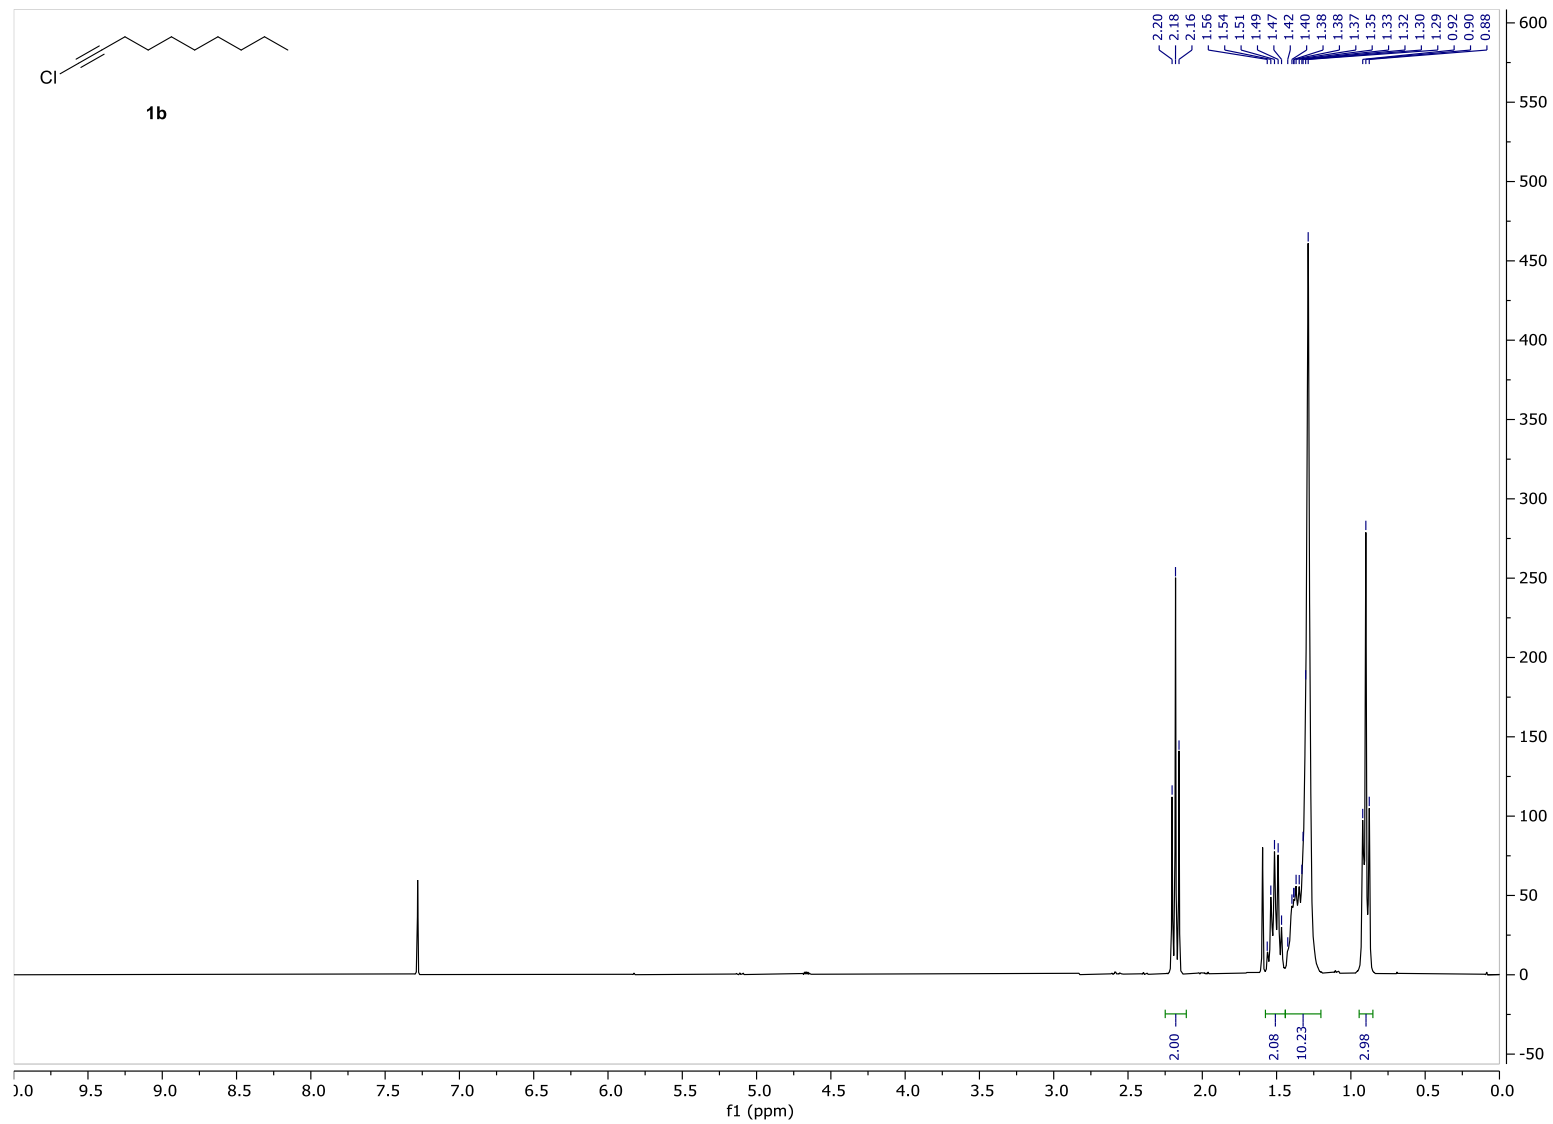

Figure S17.  $^1\text{H-NMR}$  spectrum ( $\text{CDCl}_3$ ) of compound **1b**.

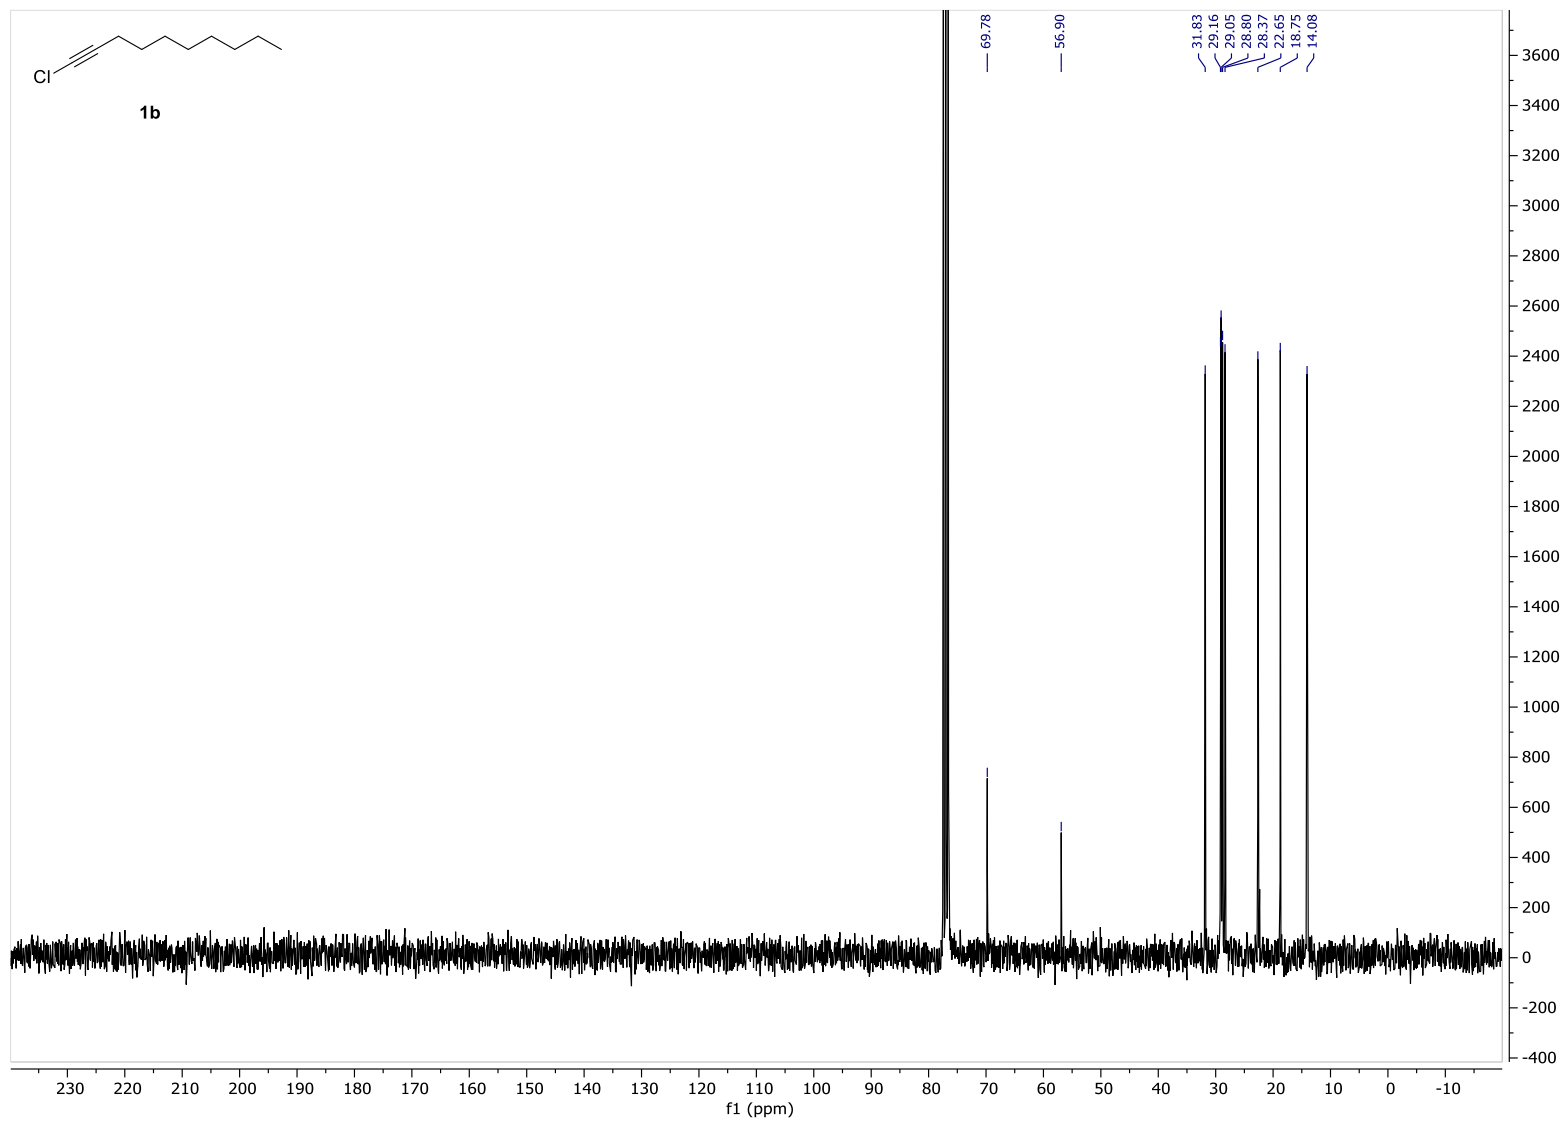

Figure S18.  $^{13}\text{C}$ -NMR spectrum ( $\text{CDCl}_3$ ) of compound **1b**.

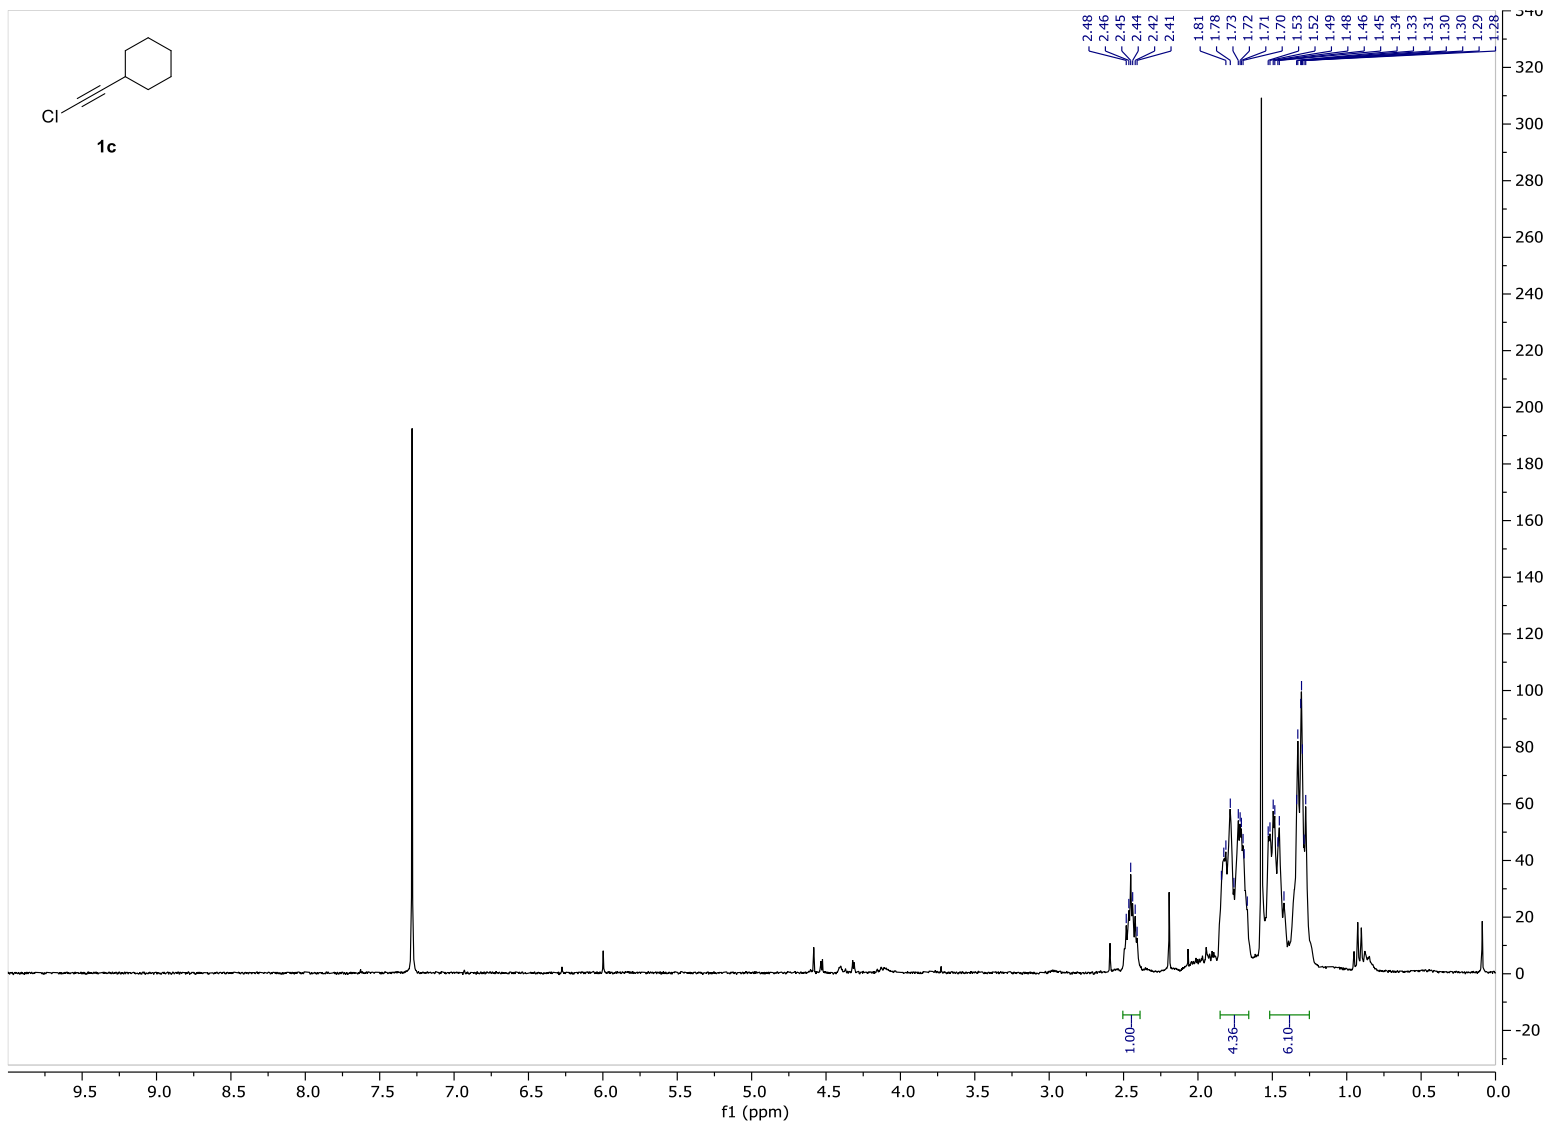

Figure S19.  $^1\text{H-NMR}$  spectrum ( $\text{CDCl}_3$ ) of compound **1c**.

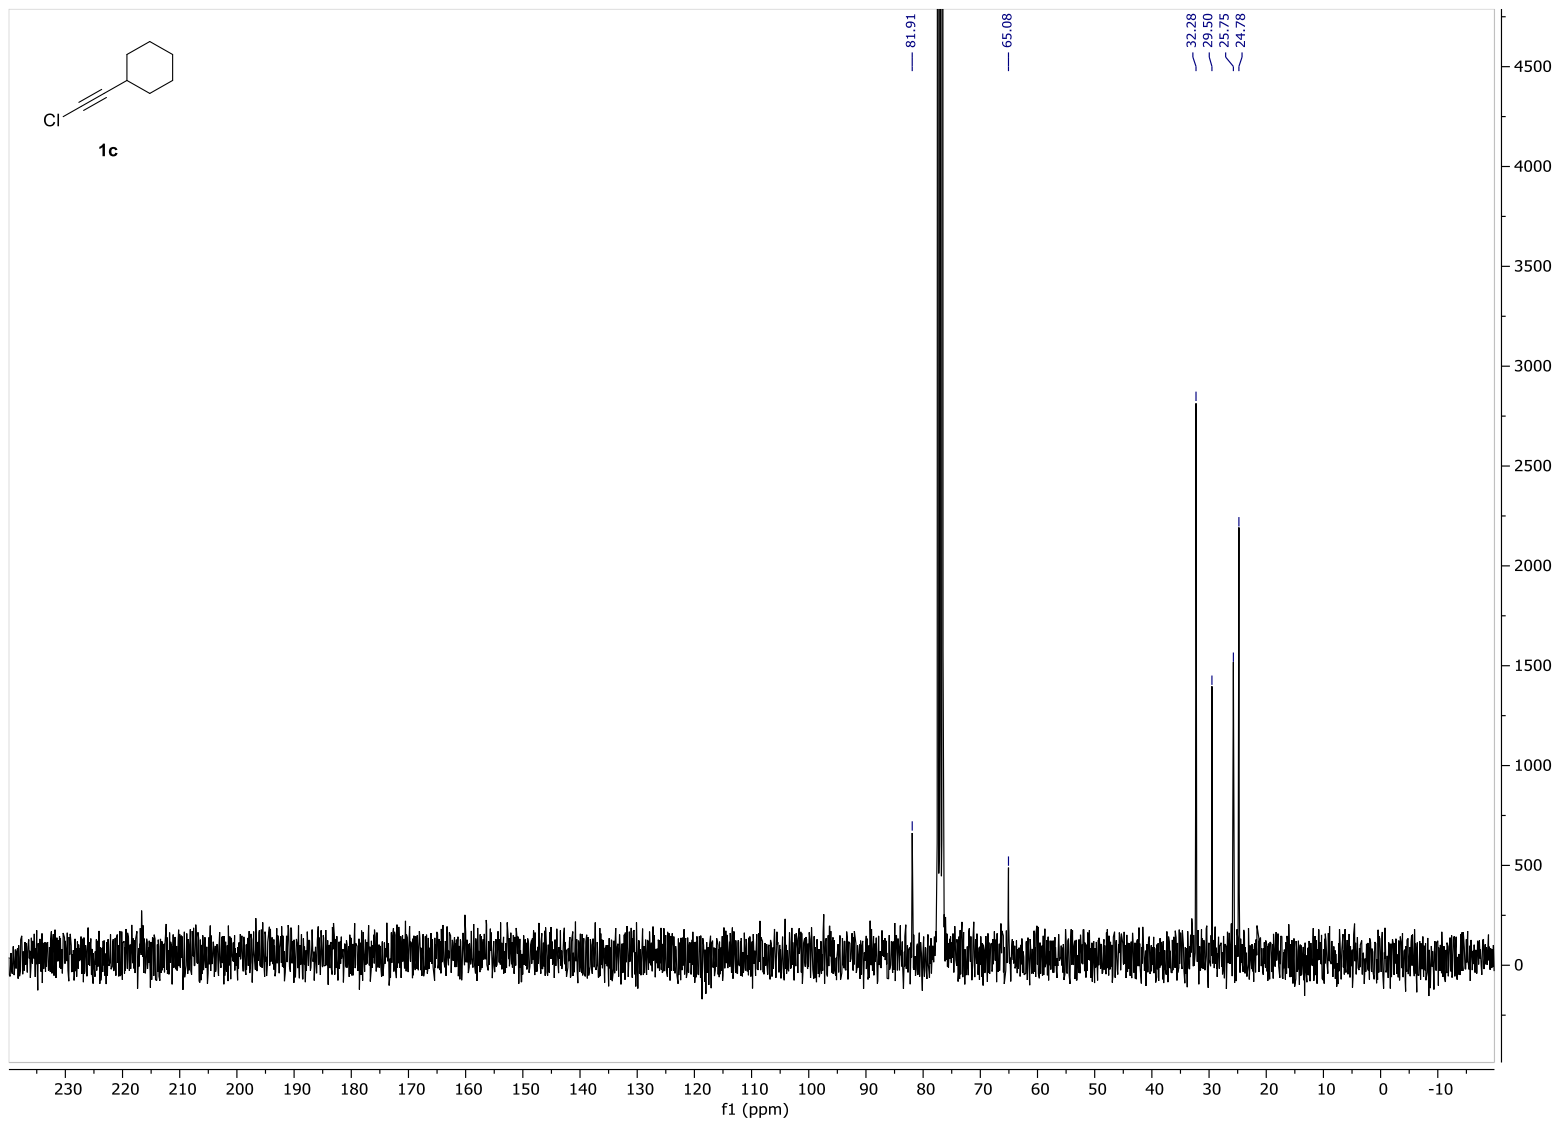

Figure S20.  $^{13}\text{C}$ -NMR spectrum ( $\text{CDCl}_3$ ) of compound **1c**.

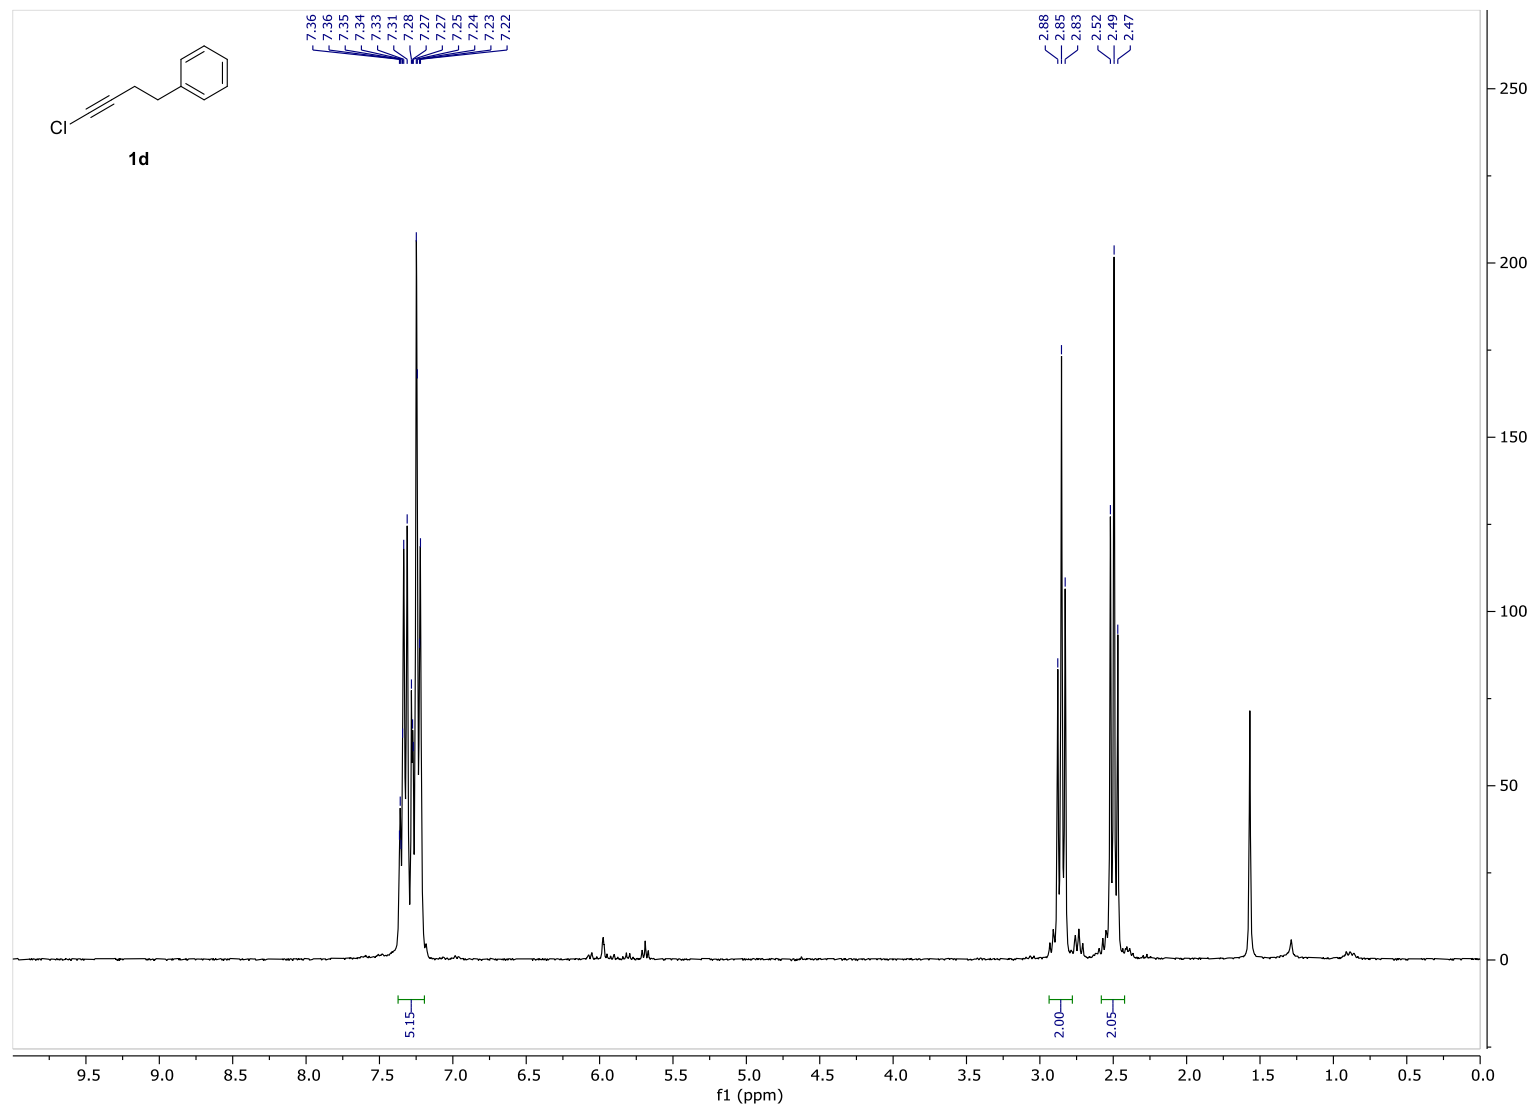

**Figure S21.** <sup>1</sup>H-NMR spectrum (CDCl<sub>3</sub>) of compound **1d**.

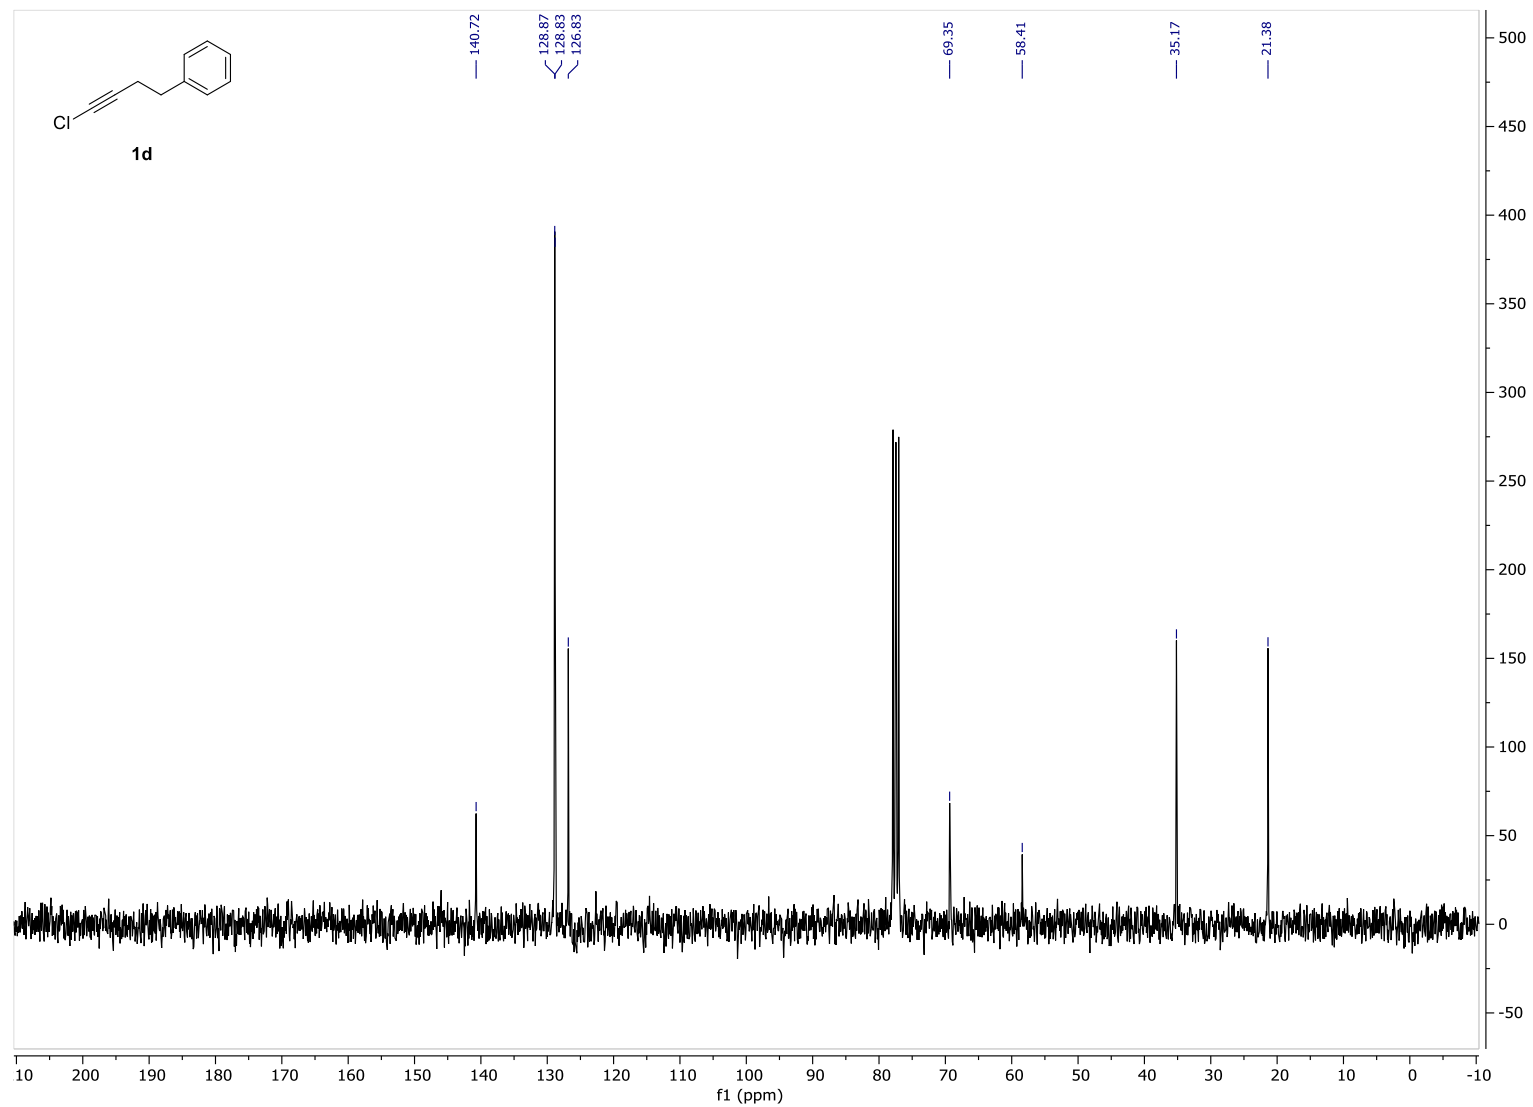

Figure S22.  $^{13}\text{C}$ -NMR spectrum (CDCl<sub>3</sub>) of compound **1d**.

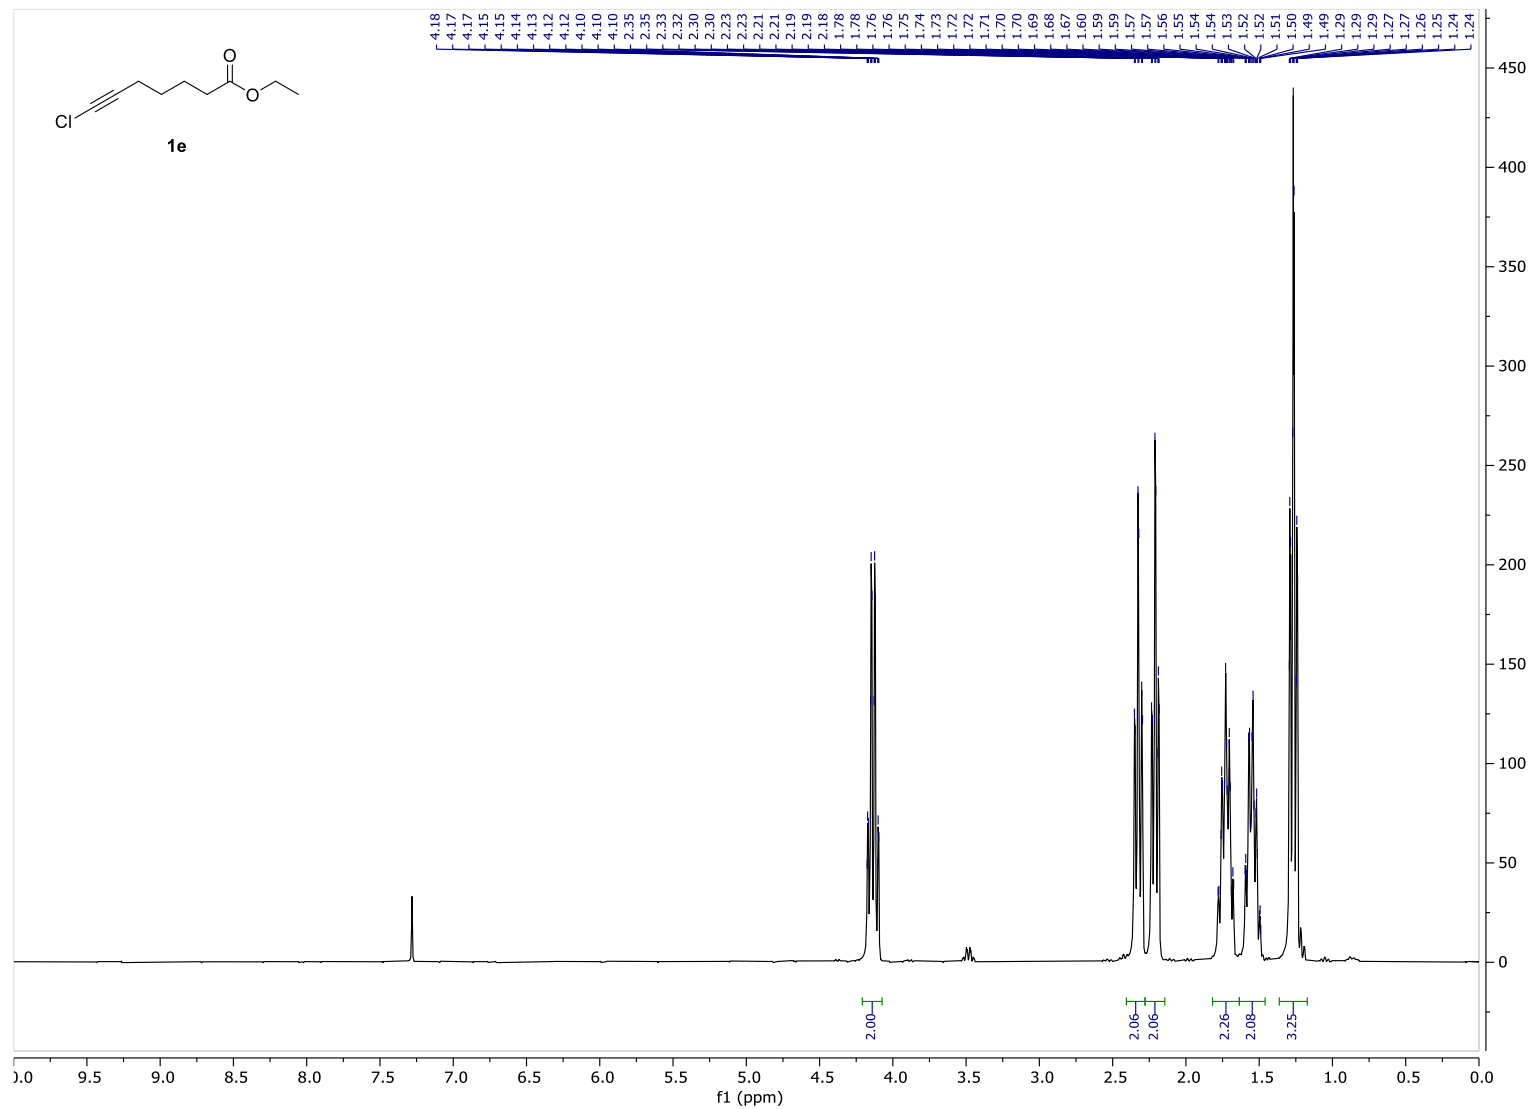

Figure S23. <sup>1</sup>H-NMR spectrum (CDCl<sub>3</sub>) of compound **1e**.



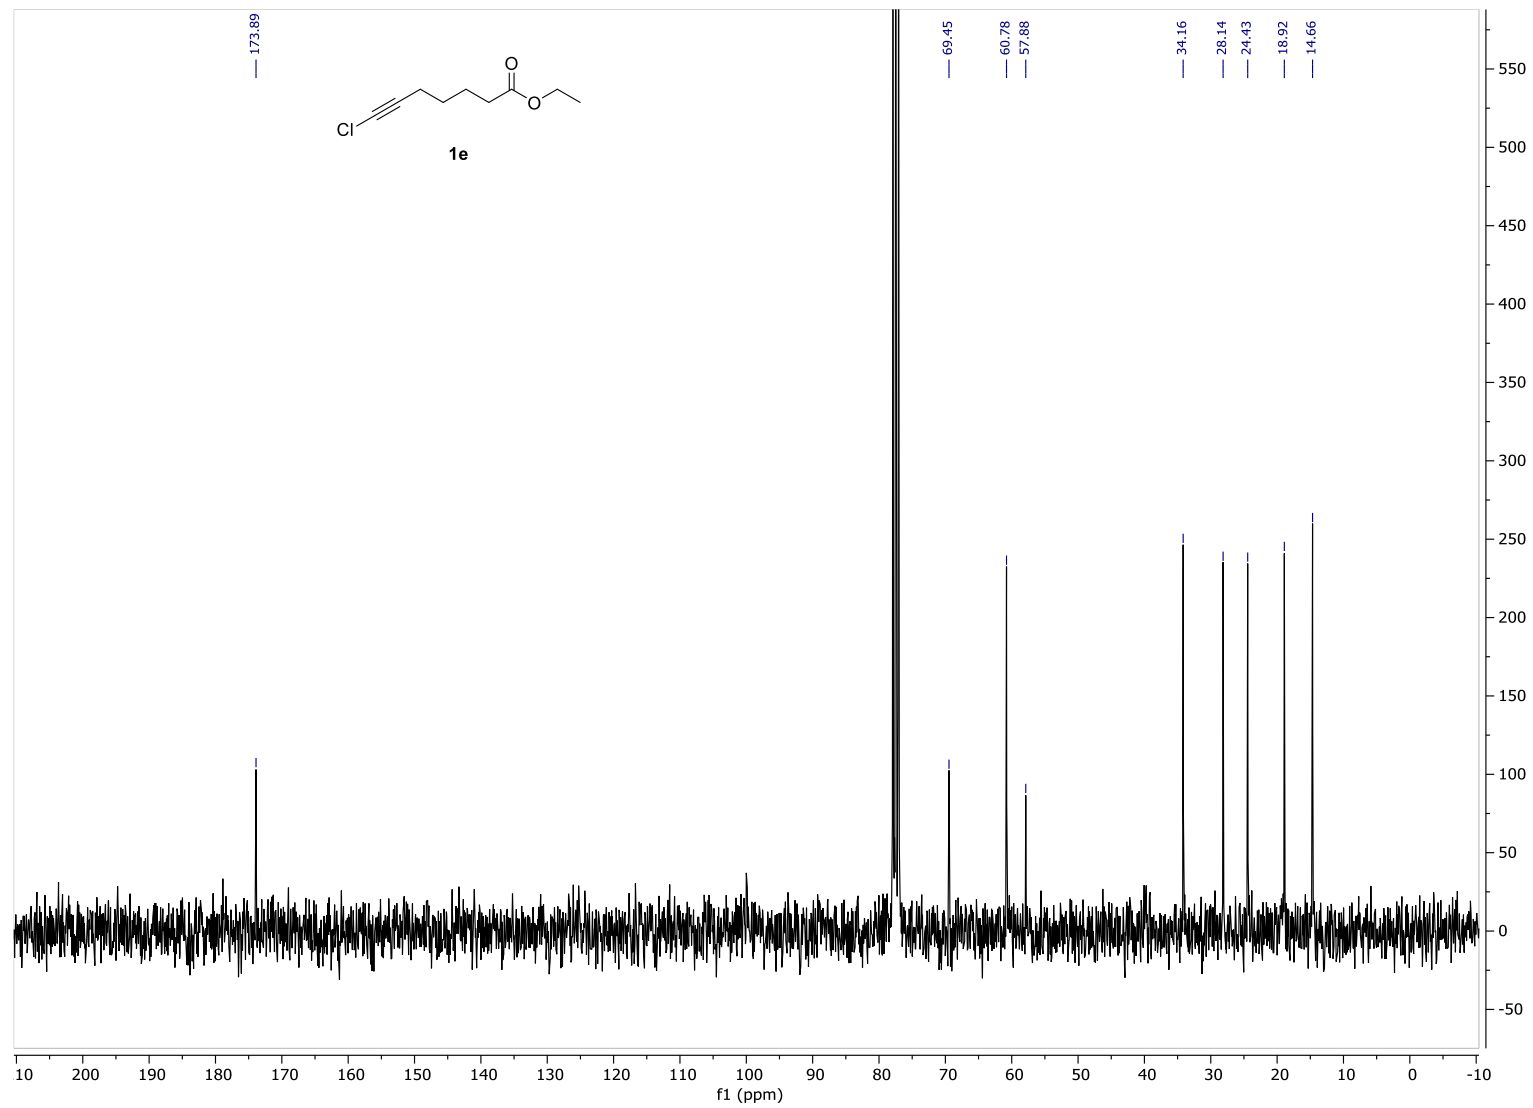

Figure S24.  $^{13}\text{C}$ -NMR spectrum (CDCl<sub>3</sub>) of compound **1e**.

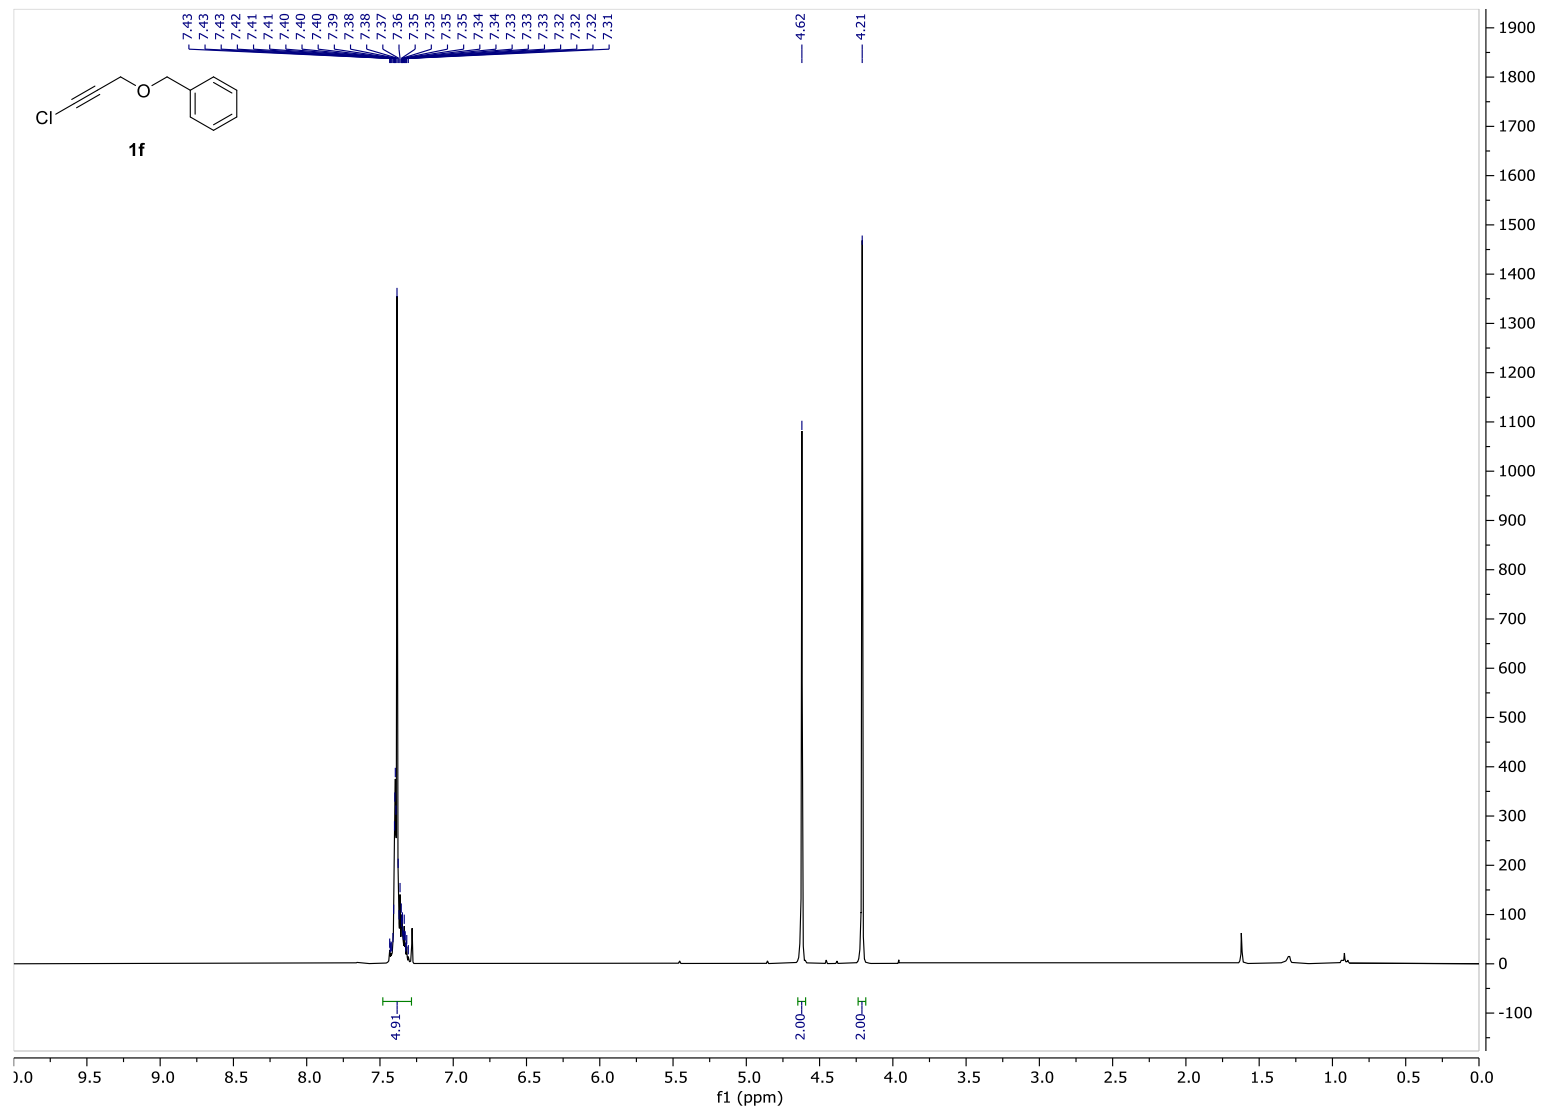

Figure S25.  $^1\text{H}$ -NMR spectrum ( $\text{CDCl}_3$ ) of compound **1f**.

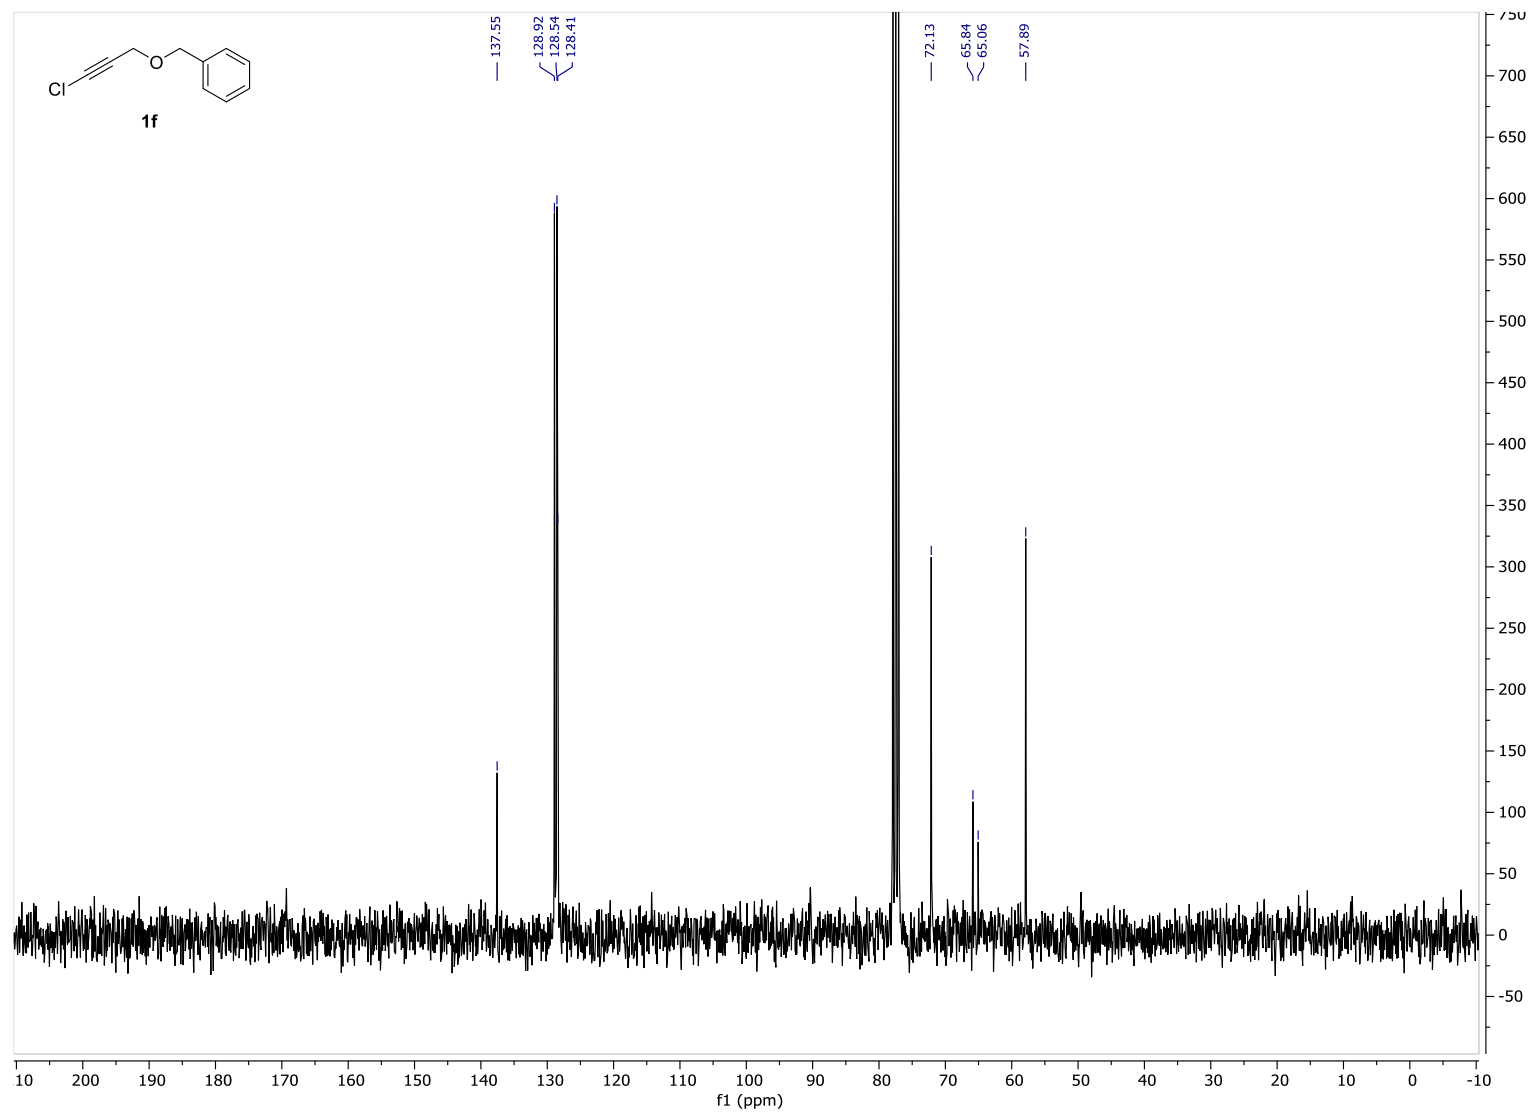

Figure S26.  $^{13}\text{C}$ -NMR spectrum (CDCl<sub>3</sub>) of compound **1f**.

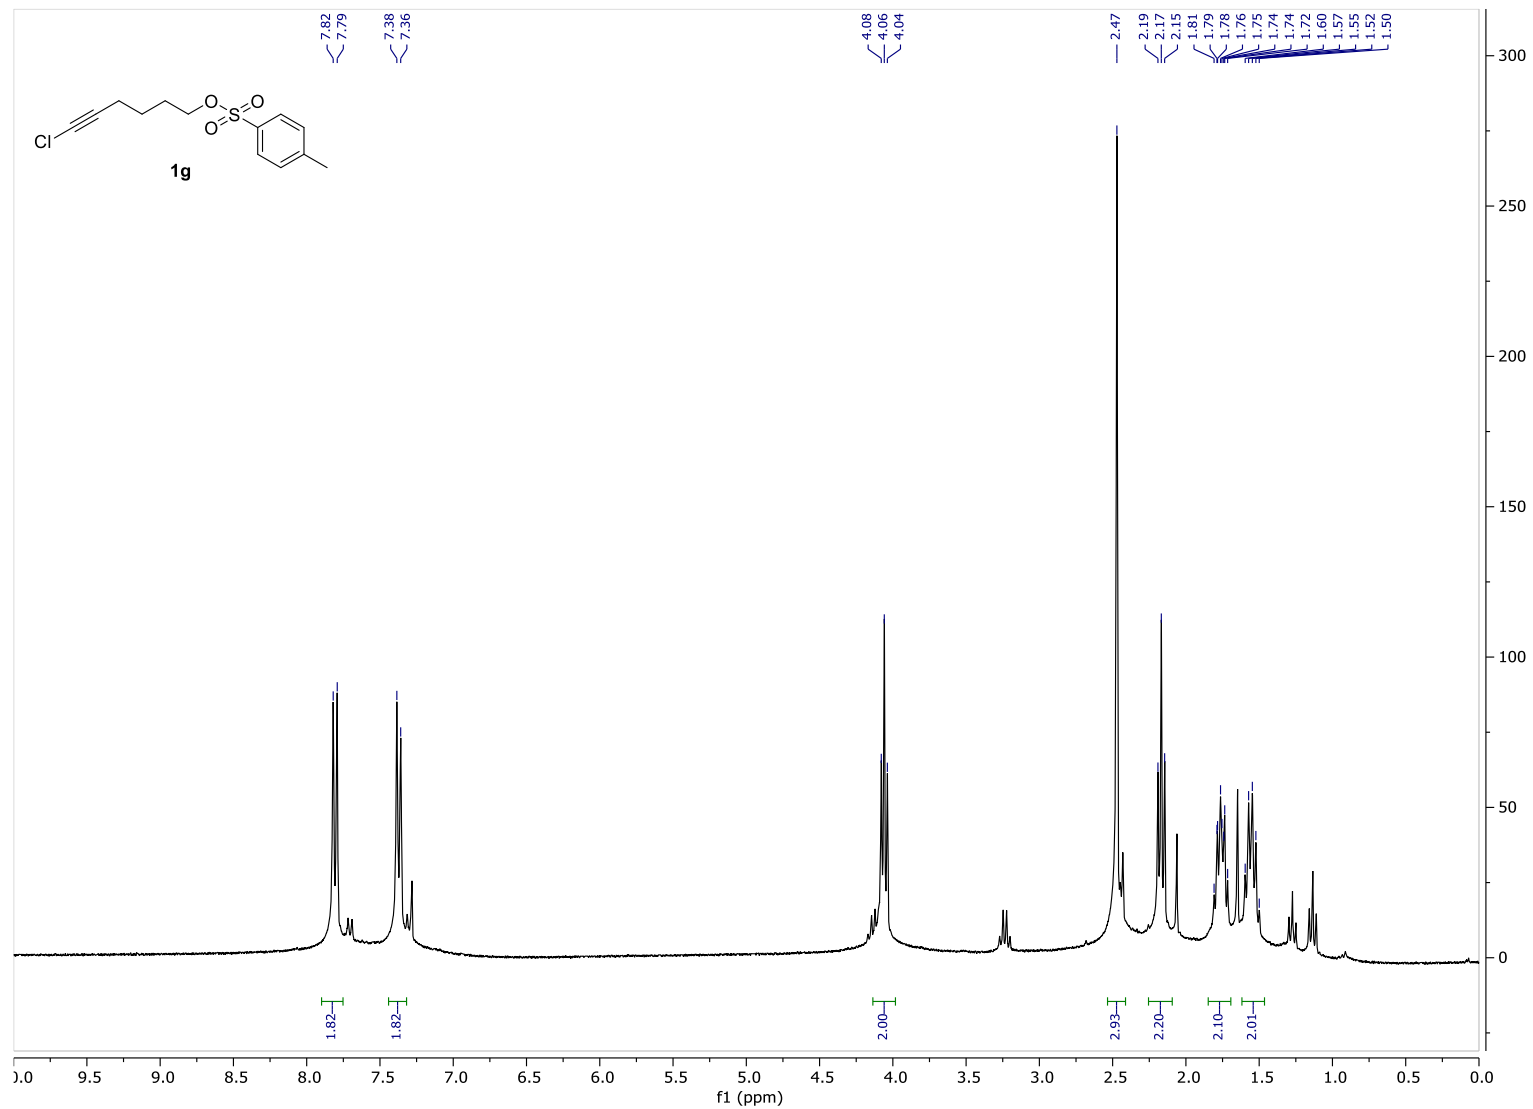

Figure S27. <sup>1</sup>H-NMR spectrum (CDCl<sub>3</sub>) of compound **1g**.

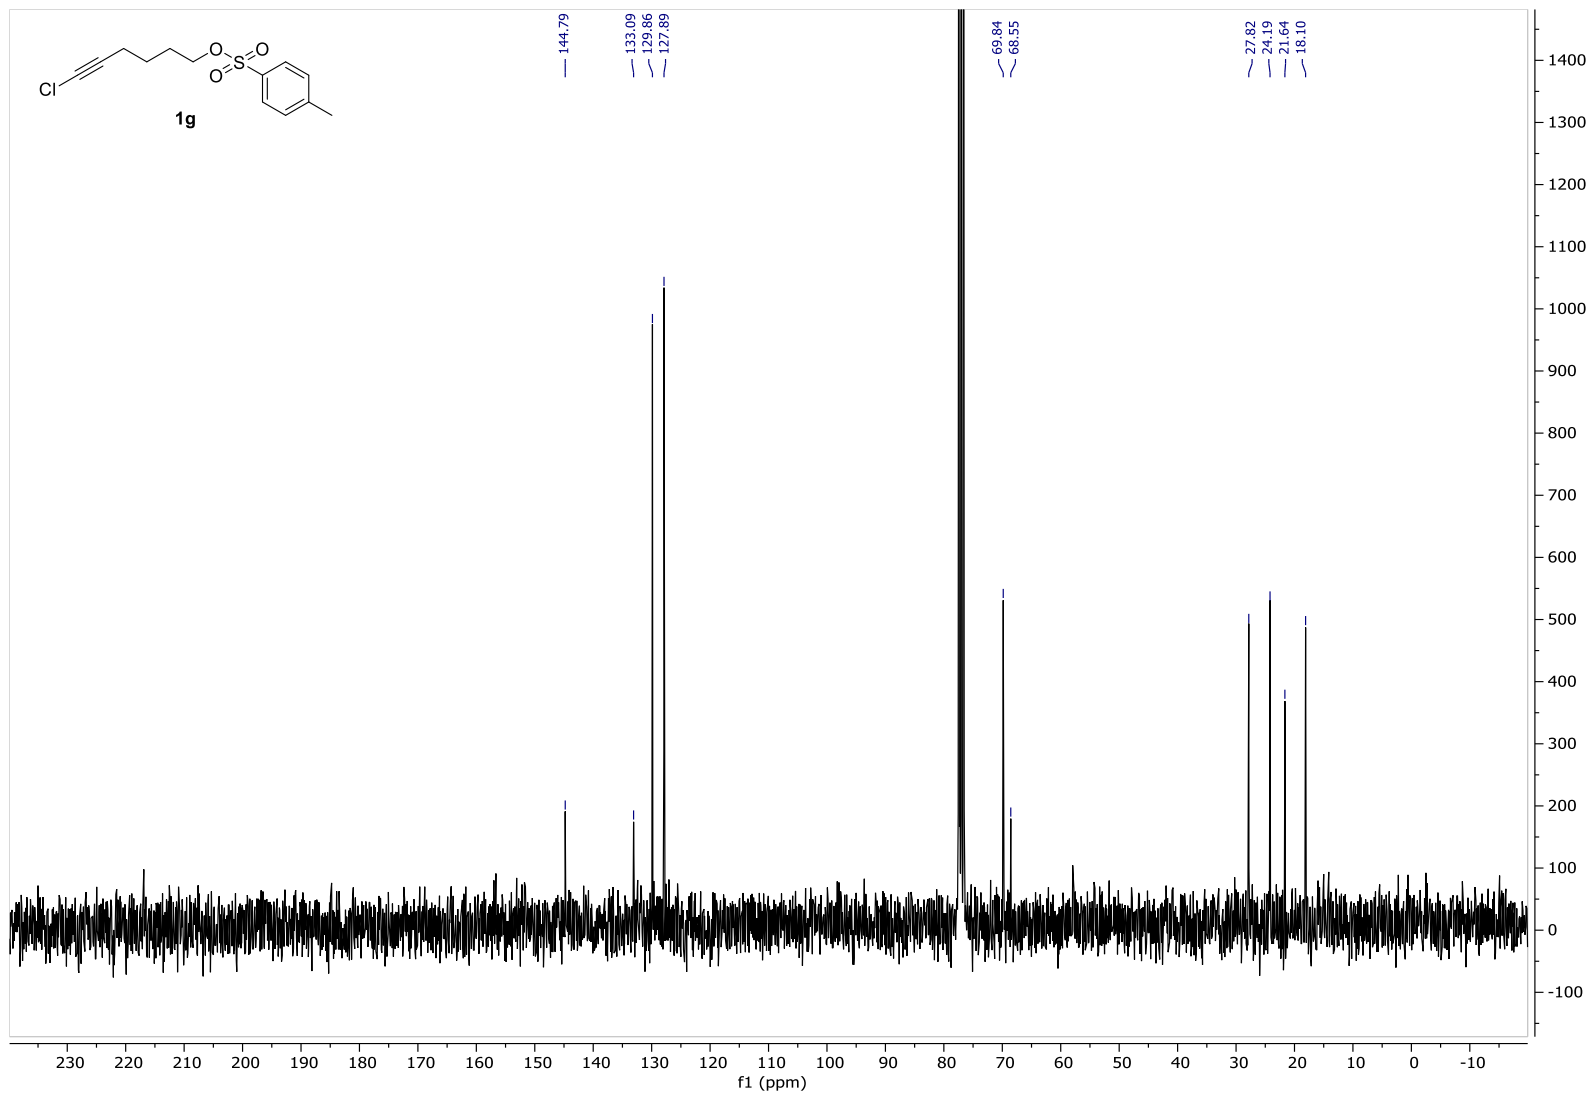

Figure S28. <sup>13</sup>C-NMR spectrum (CDCl<sub>3</sub>) of compound **1g**.

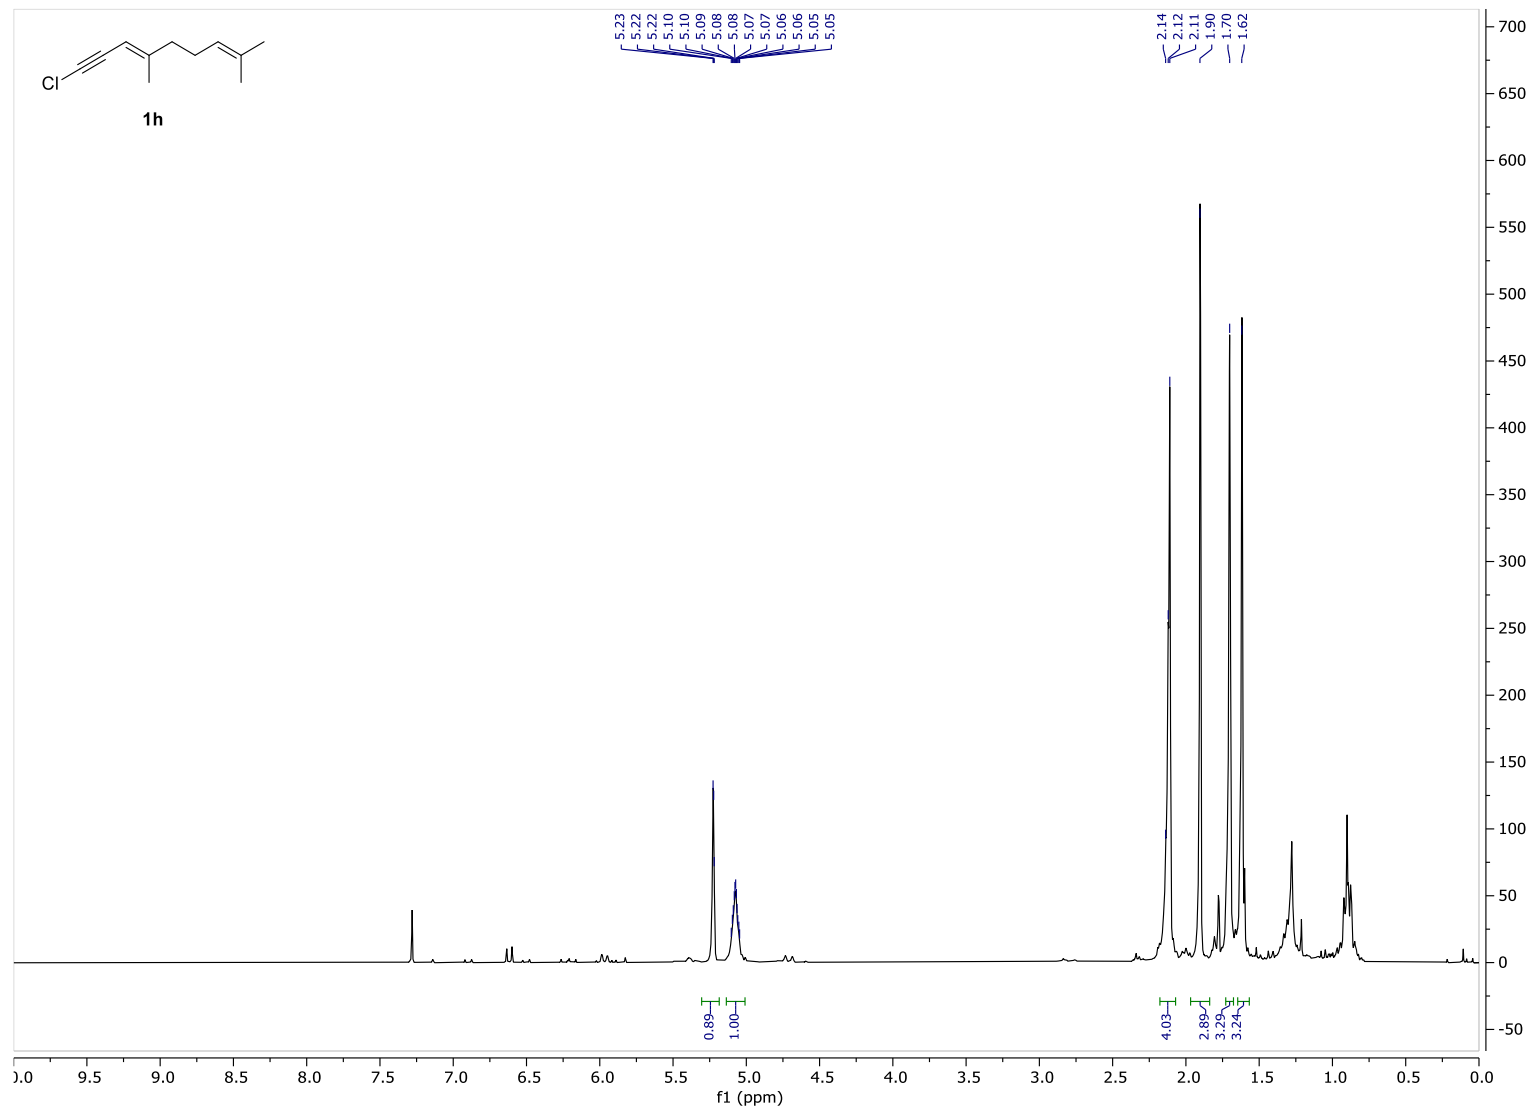

Figure S29. <sup>1</sup>H-NMR spectrum (CDCl<sub>3</sub>) of compound **1h**.

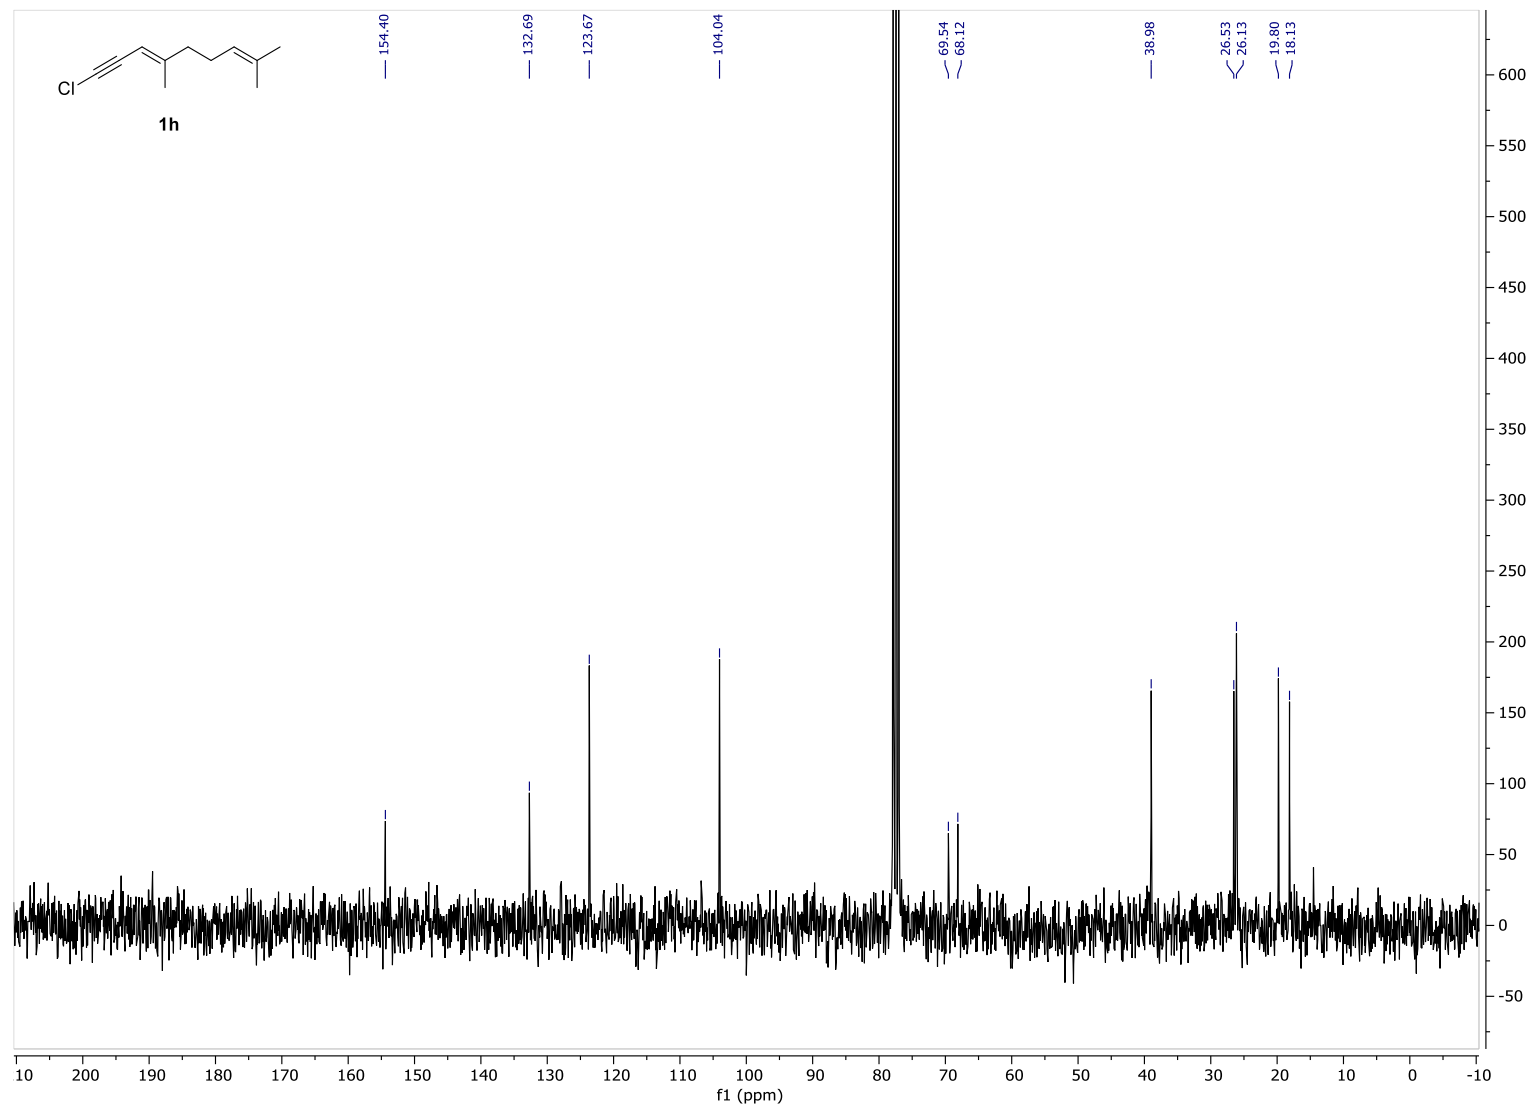

Figure S30. <sup>13</sup>C-NMR spectrum (CDCl<sub>3</sub>) of compound **1h**.

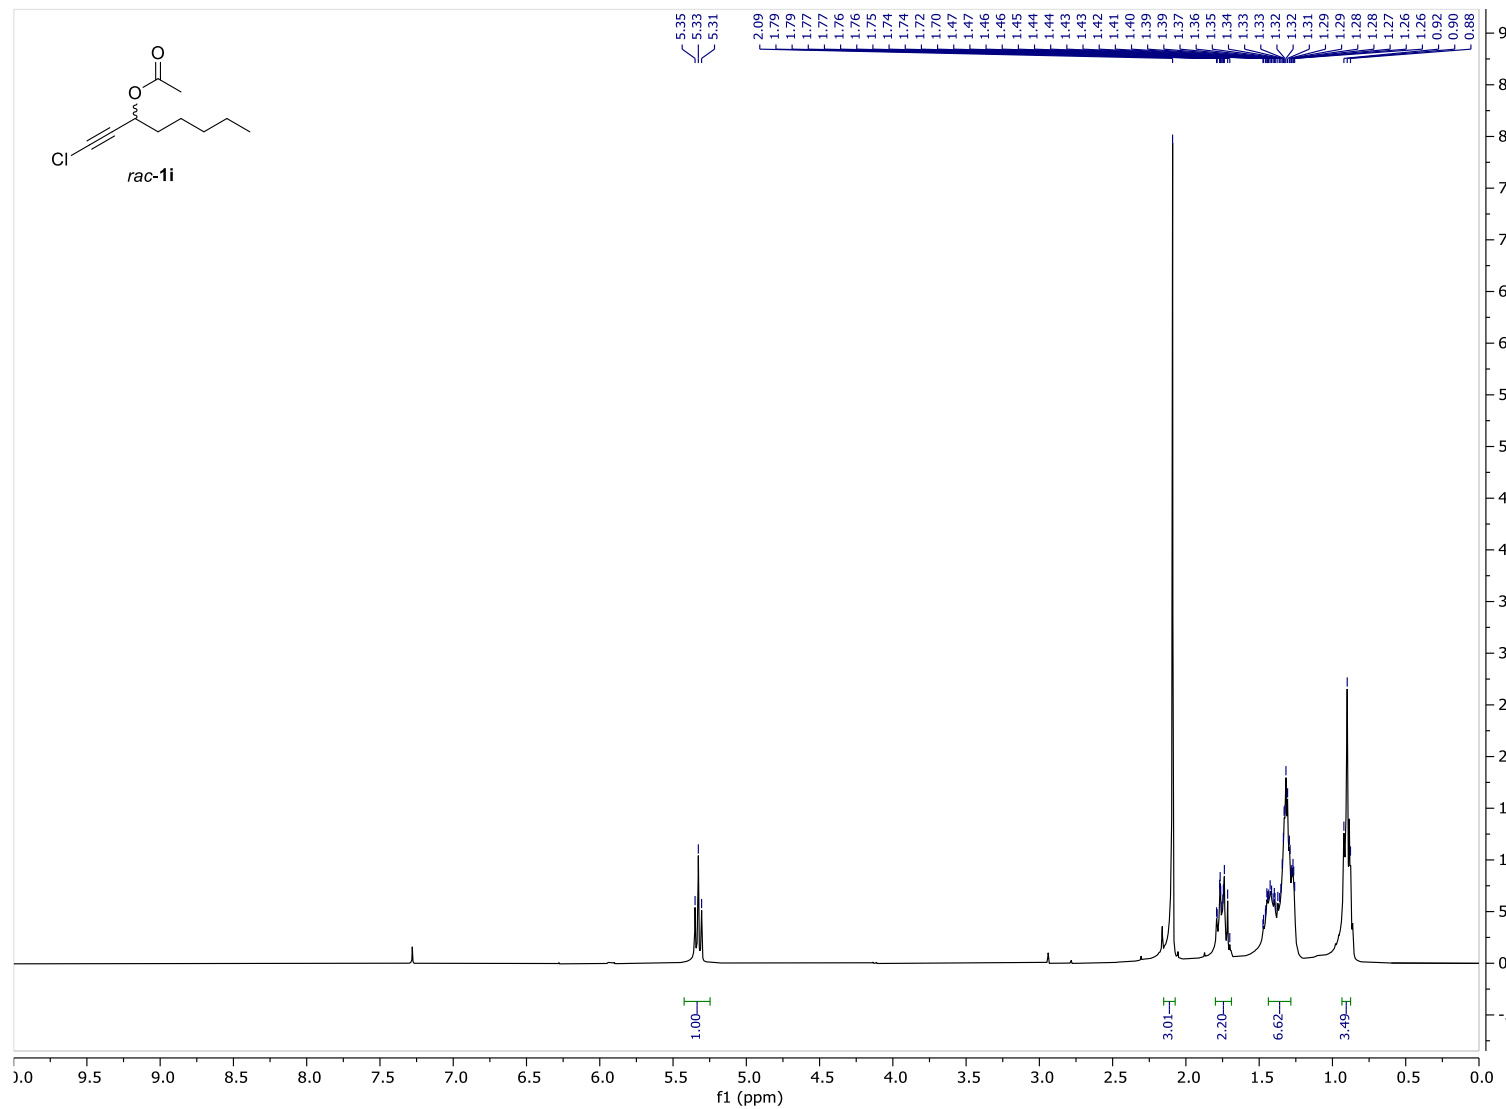

Figure S31. <sup>1</sup>H-NMR spectrum (CDCl<sub>3</sub>) of compound **1i**.



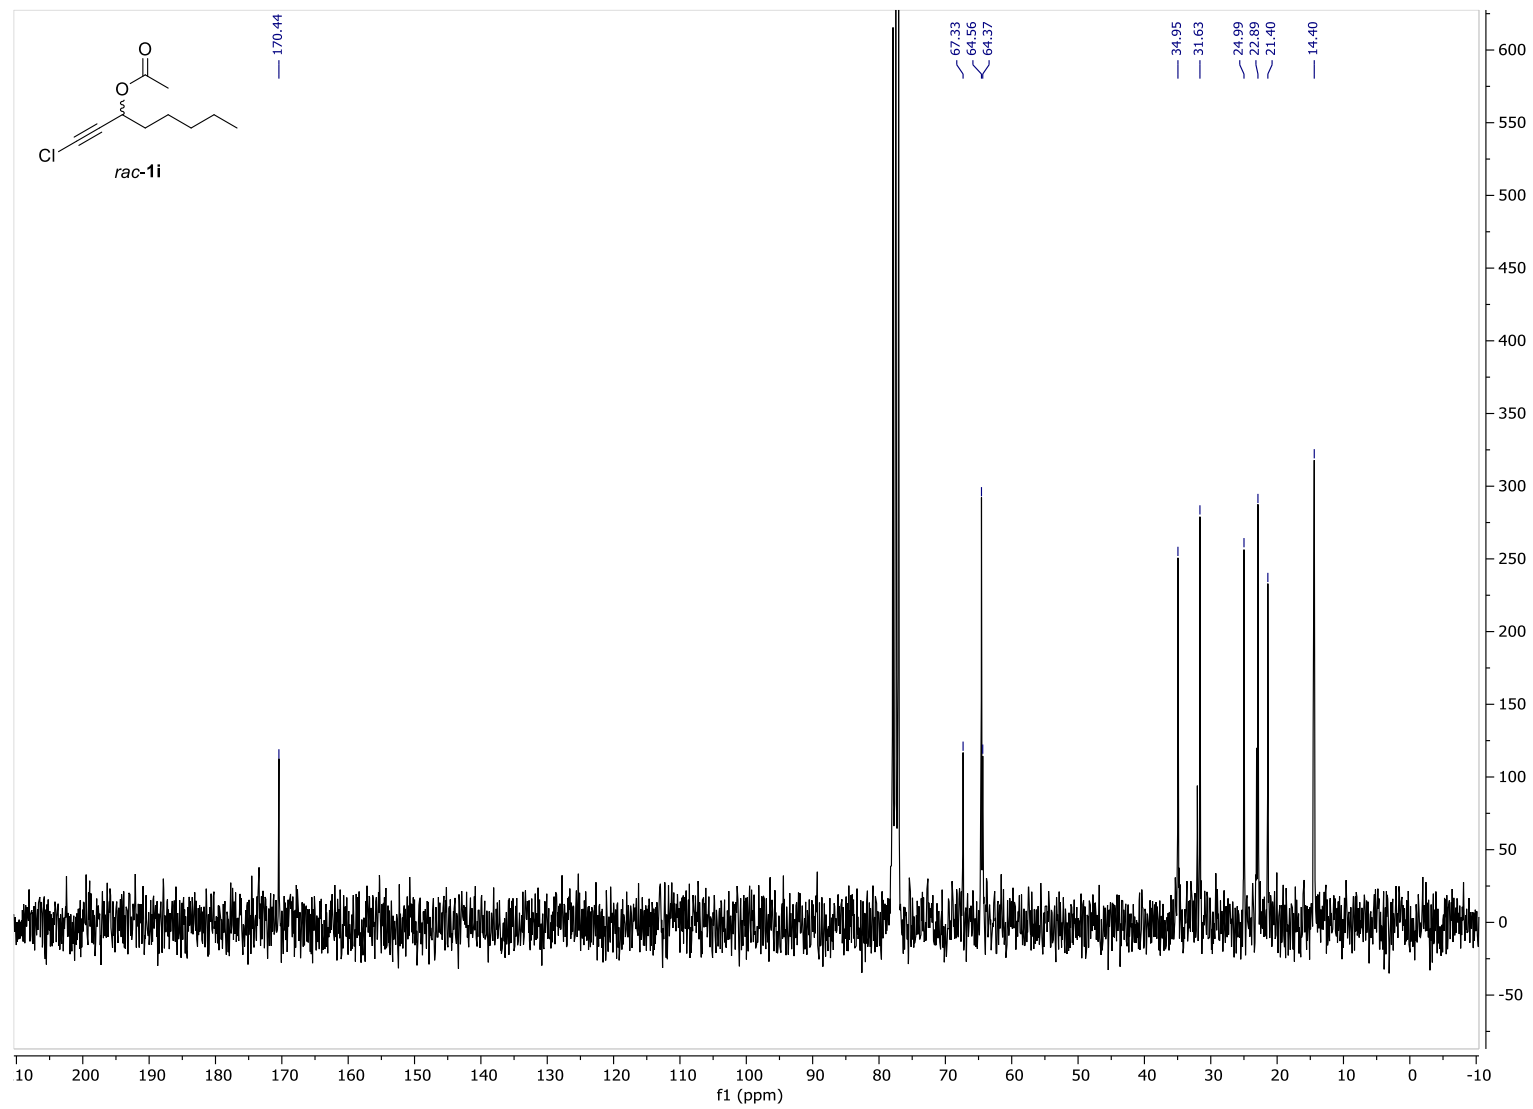

Figure S32.  $^{13}\text{C}$ -NMR spectrum ( $\text{CDCl}_3$ ) of compound **1i**.

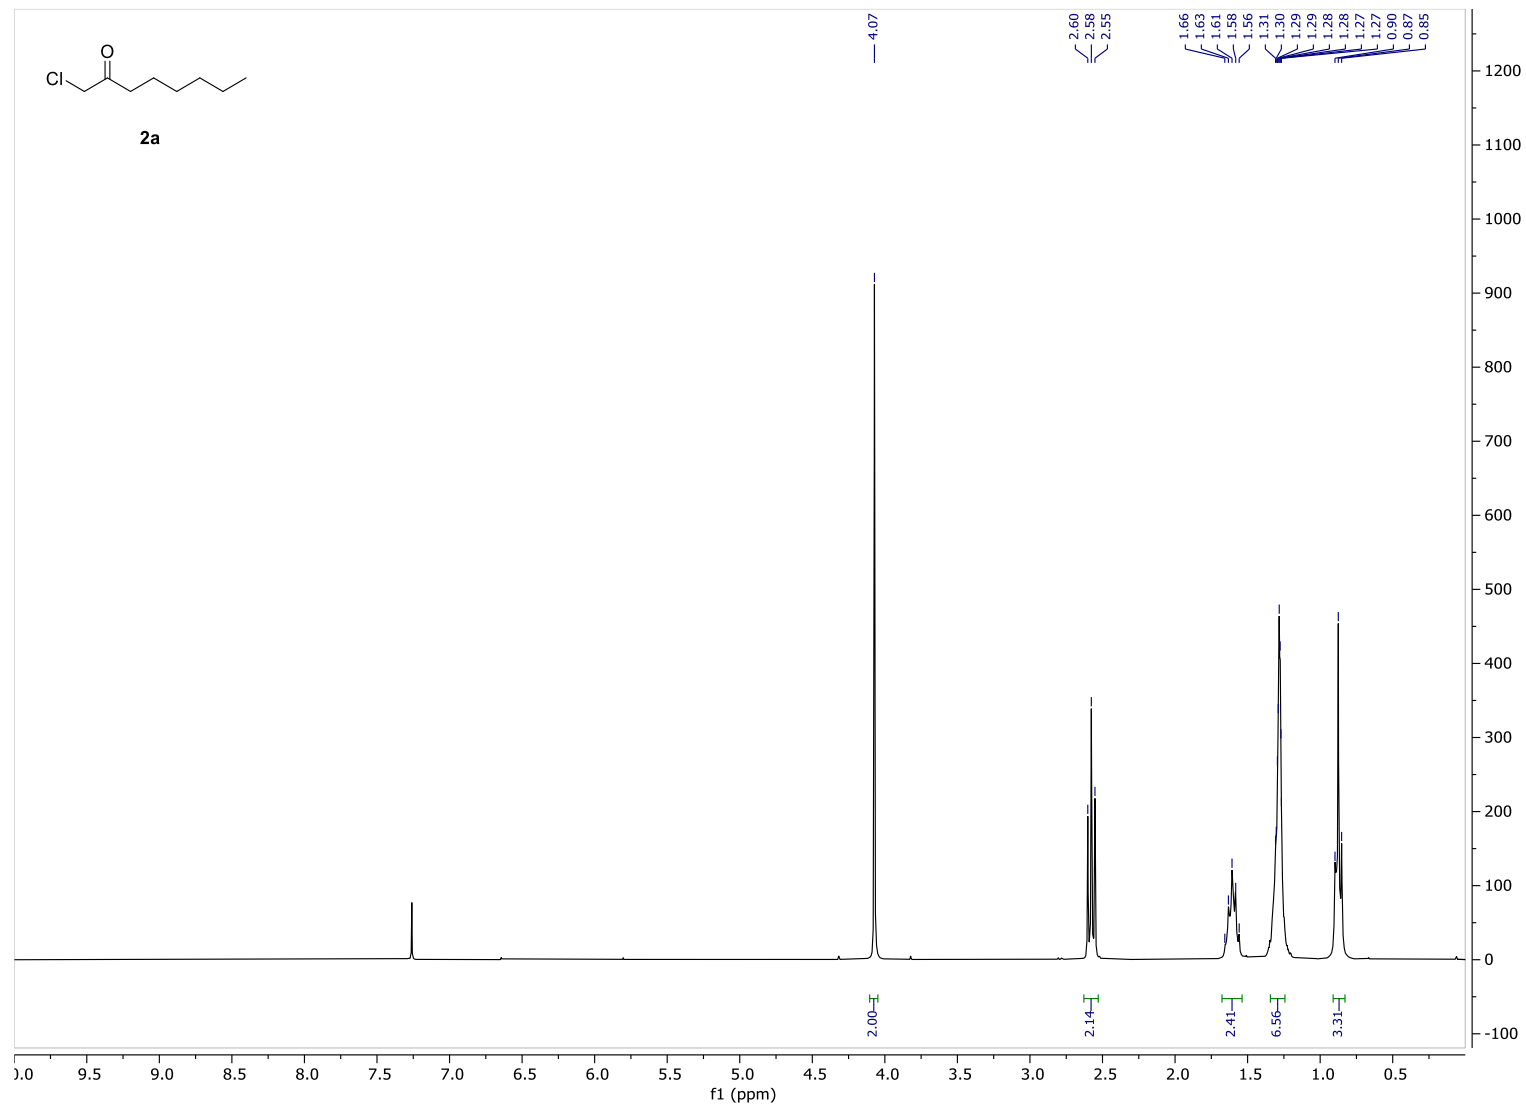

**Figure S33.**  $^1\text{H-NMR}$  spectrum ( $\text{CDCl}_3$ ) of compound **2a**.

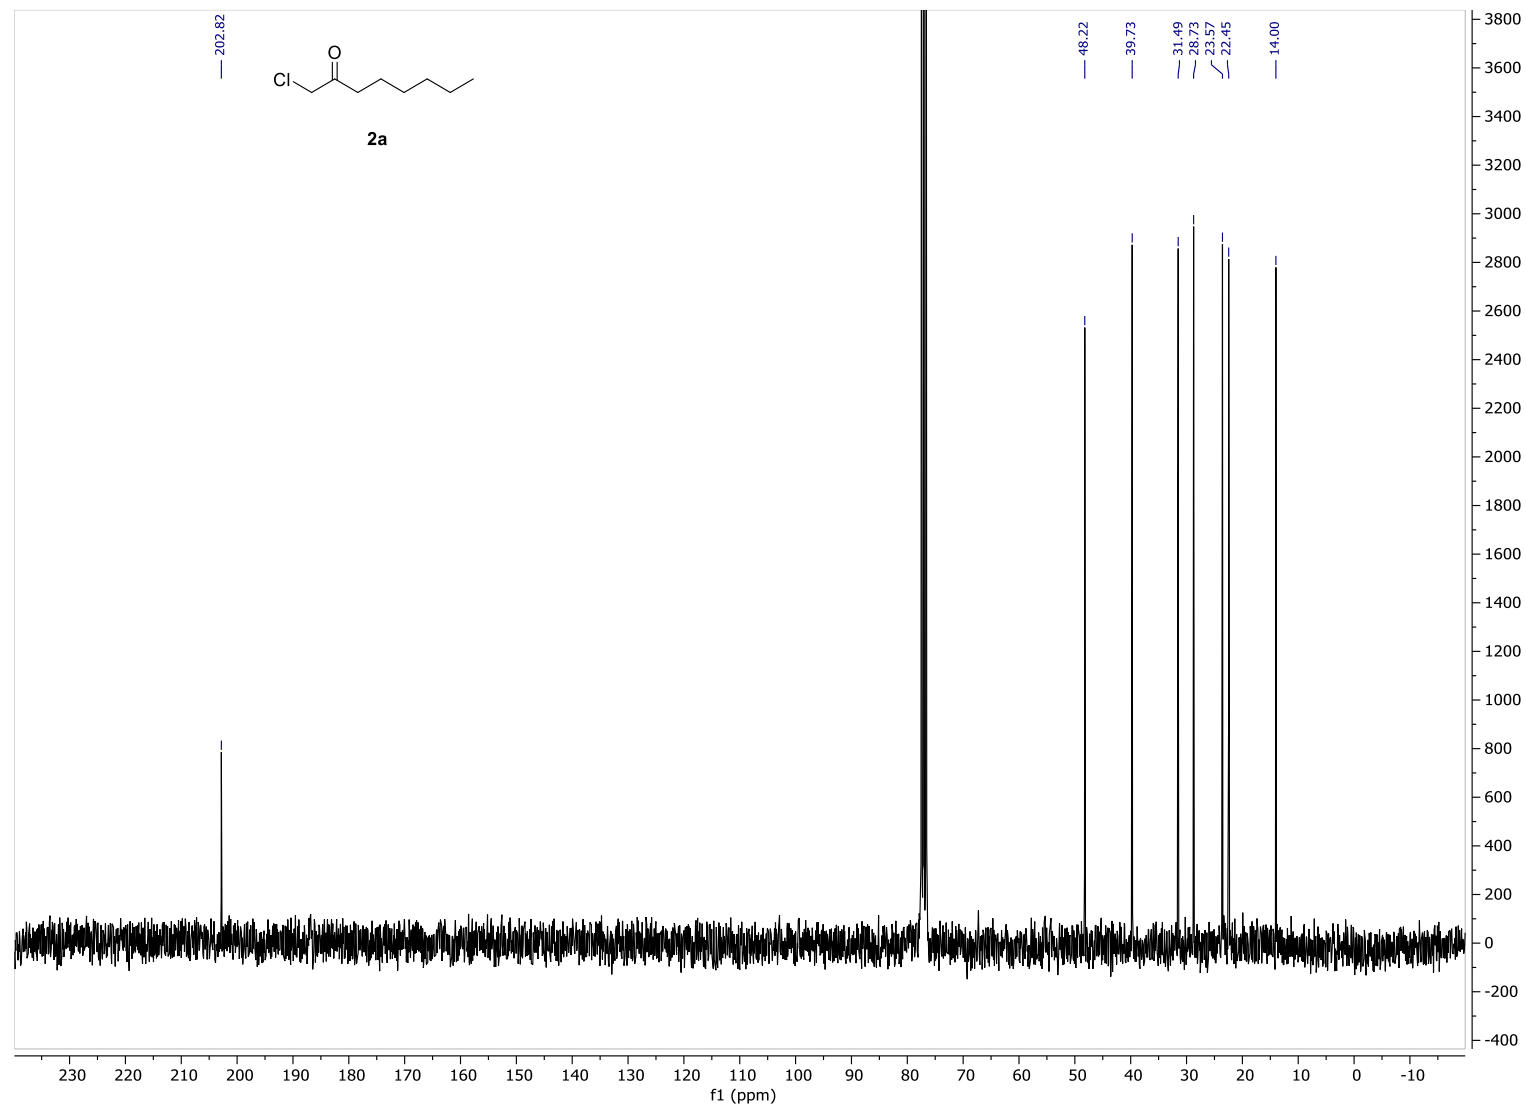

Figure S34.  $^{13}\text{C-NMR}$  spectrum (CDCl<sub>3</sub>) of compound **2a**.

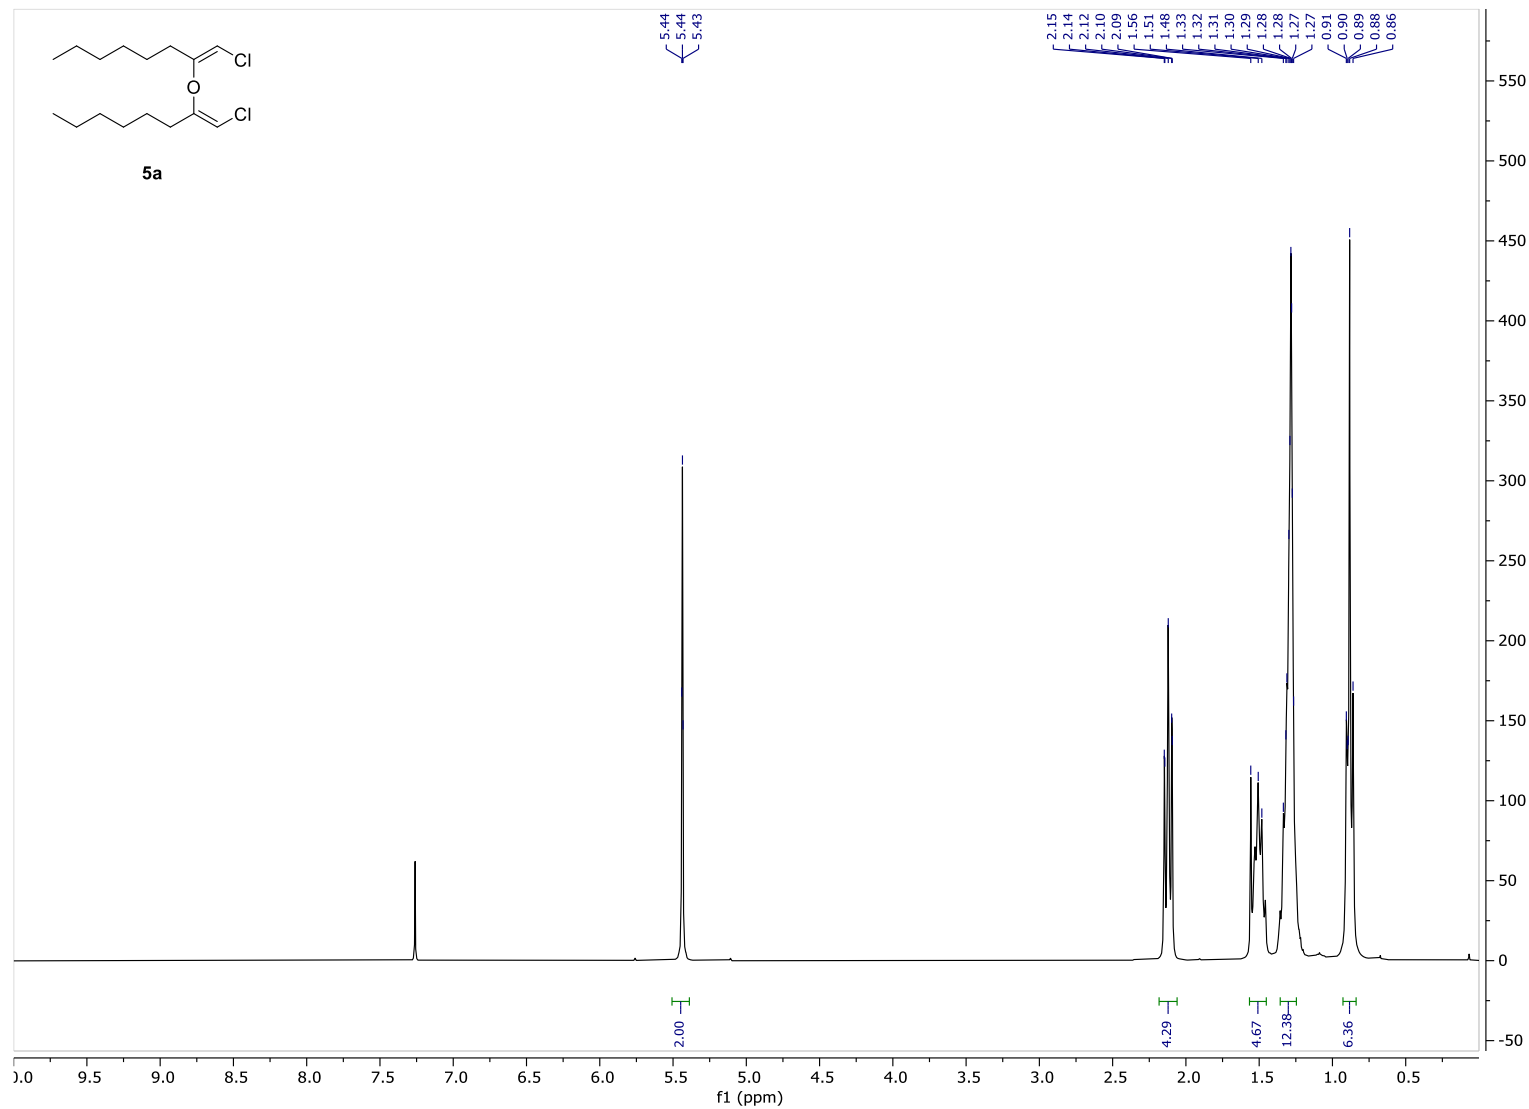

Figure S35.  $^1\text{H-NMR}$  spectrum ( $\text{CDCl}_3$ ) of by-product **5a** detected in the hydration of **1a**.

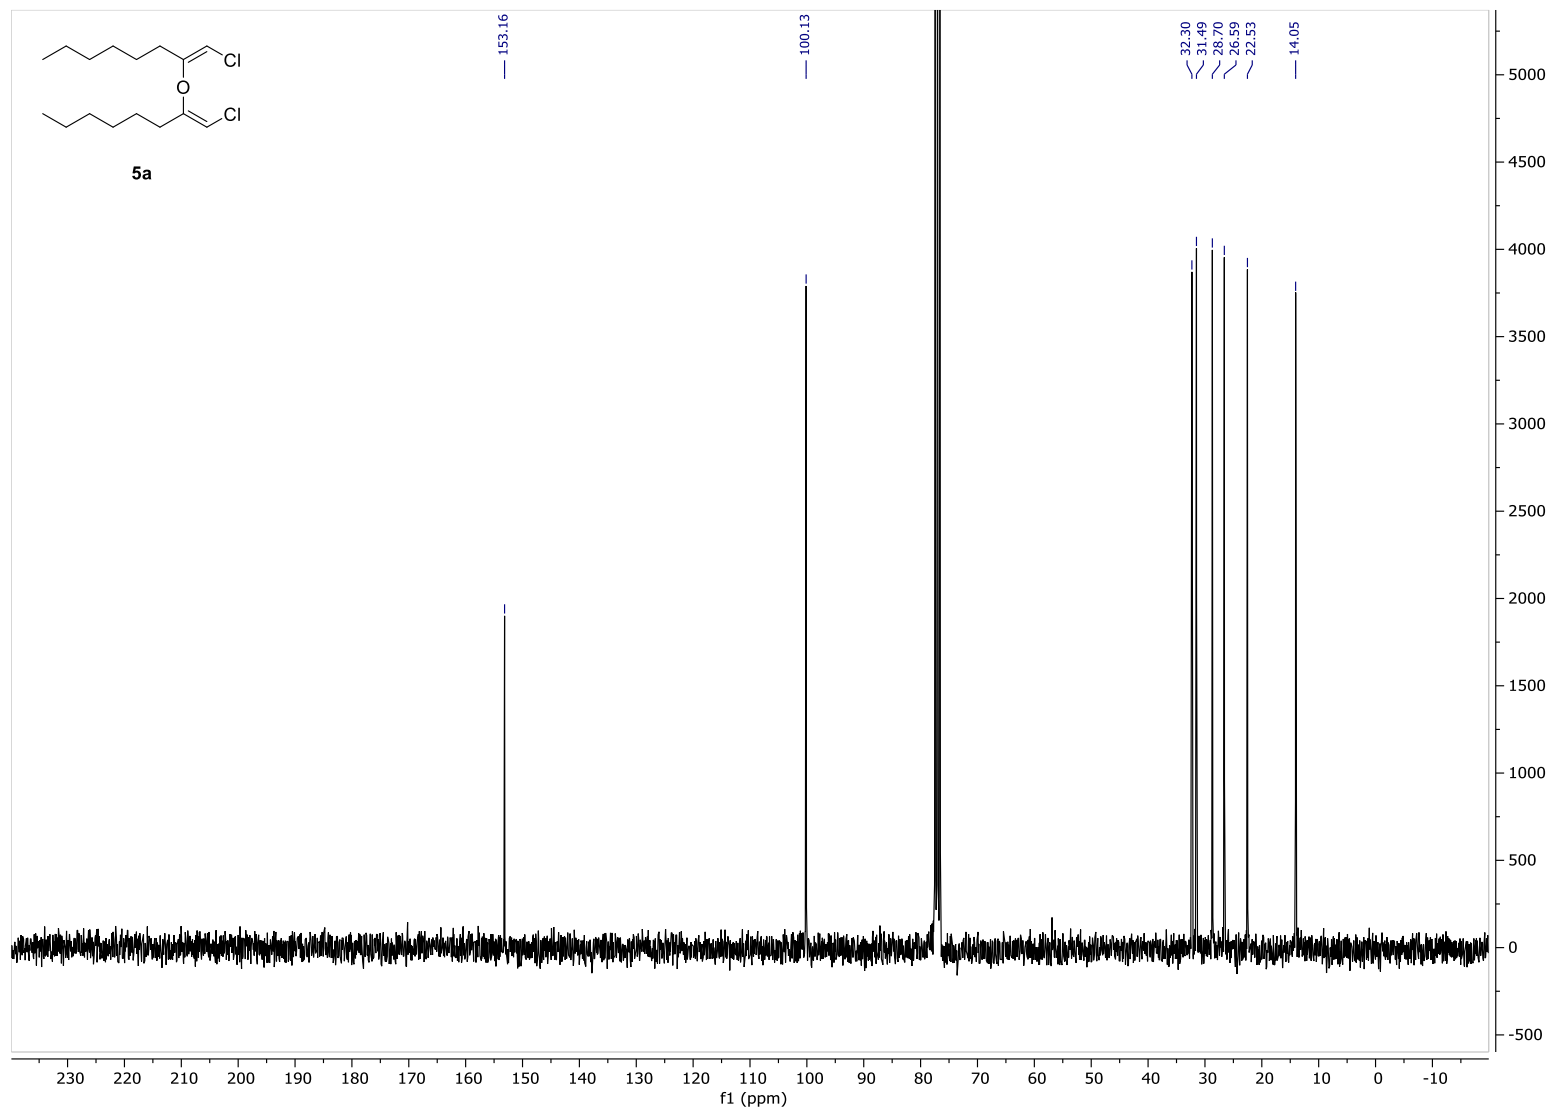

Figure S36. <sup>13</sup>C-NMR spectrum (CDCl<sub>3</sub>) of by-product **5a** detected in the hydration of **1a**.

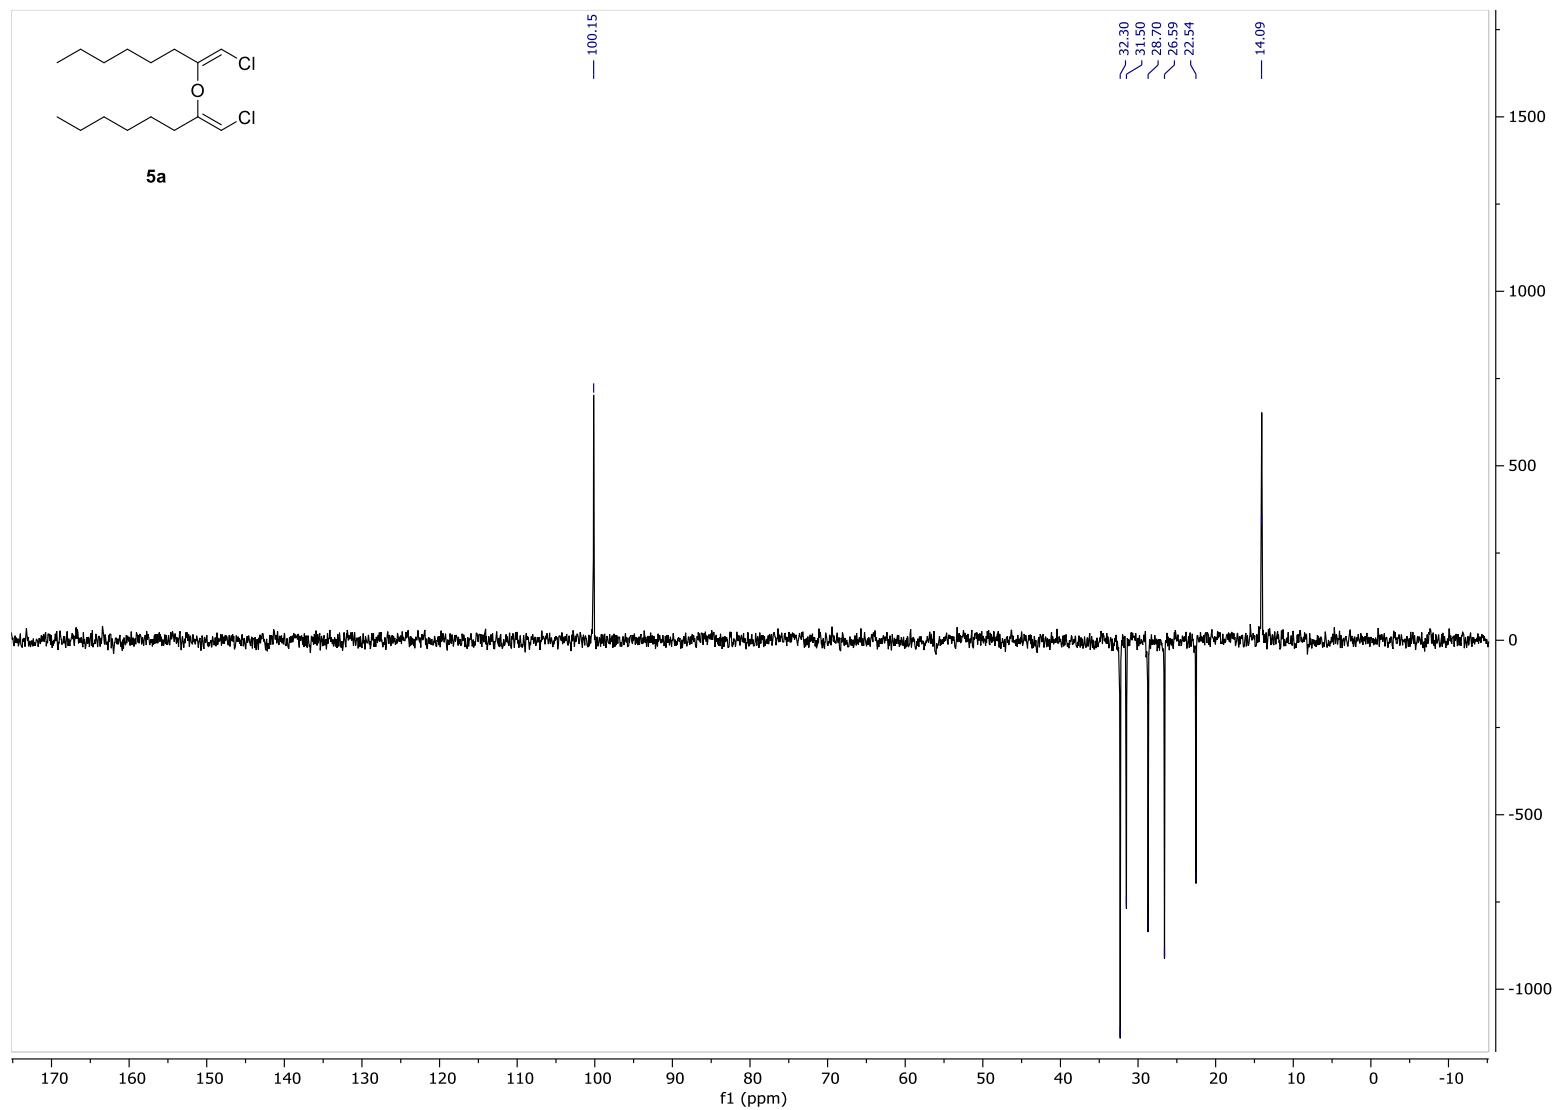

Figure S37. DEPT-NMR spectrum (CDCl<sub>3</sub>) of by-product **5a** detected in the hydration of **1a**.

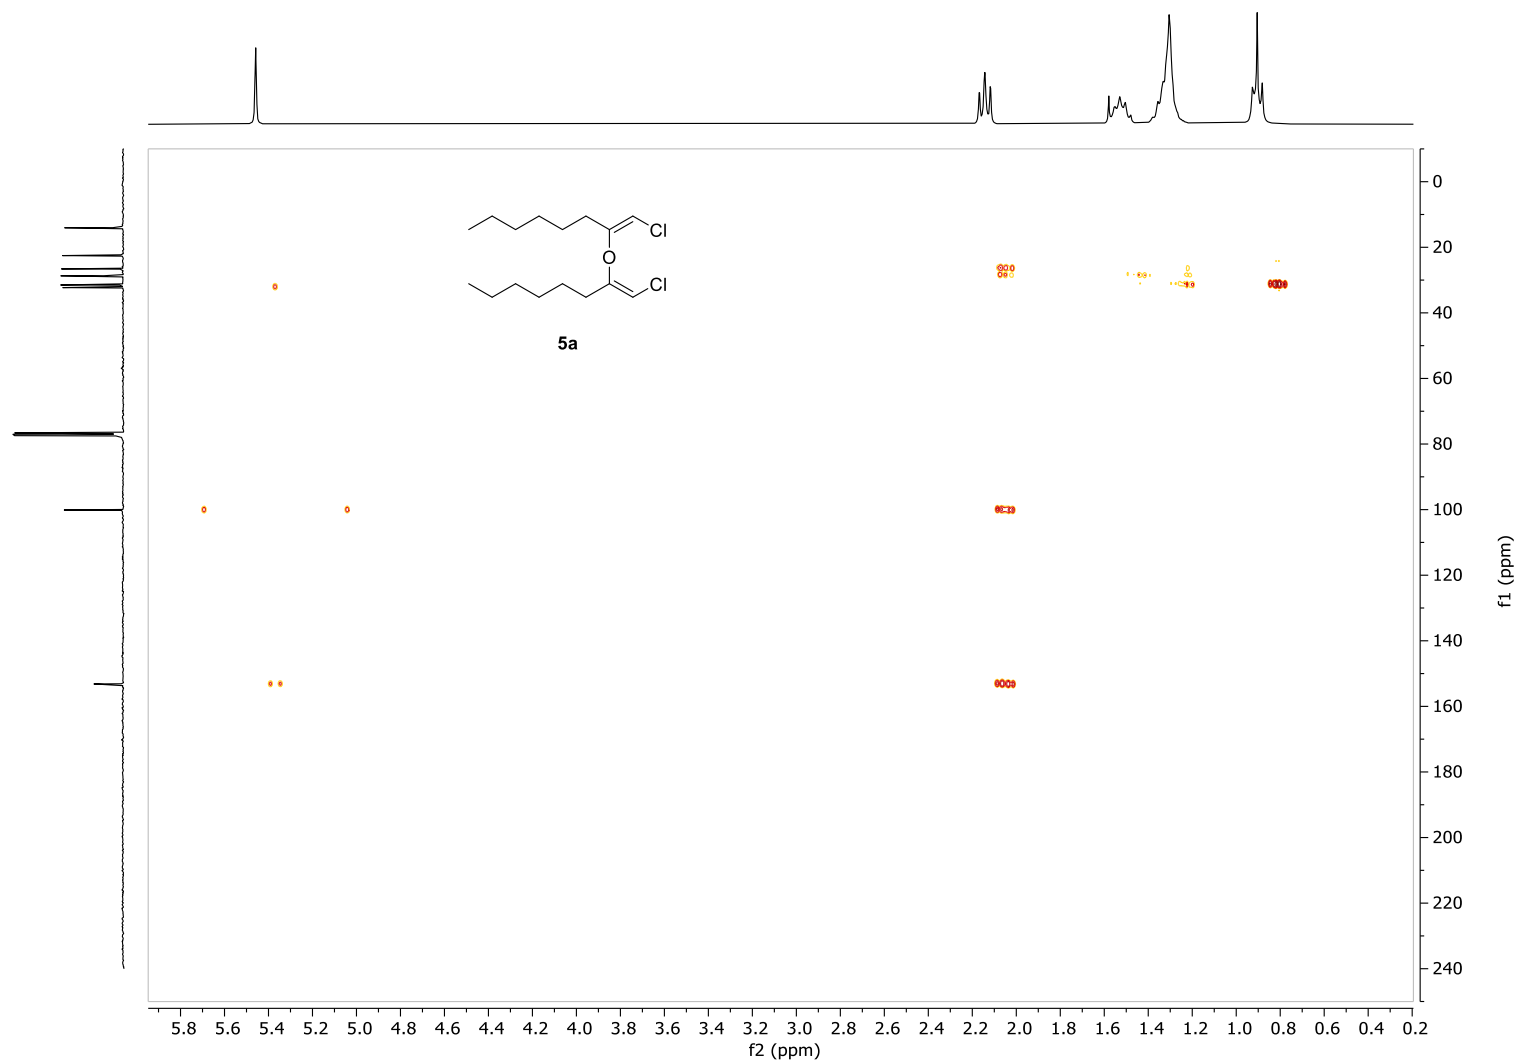

**Figure S38.** HMBC-NMR spectrum ( $\text{CDCl}_3$ ) of by-product **5a** detected in the hydration of **1a**.

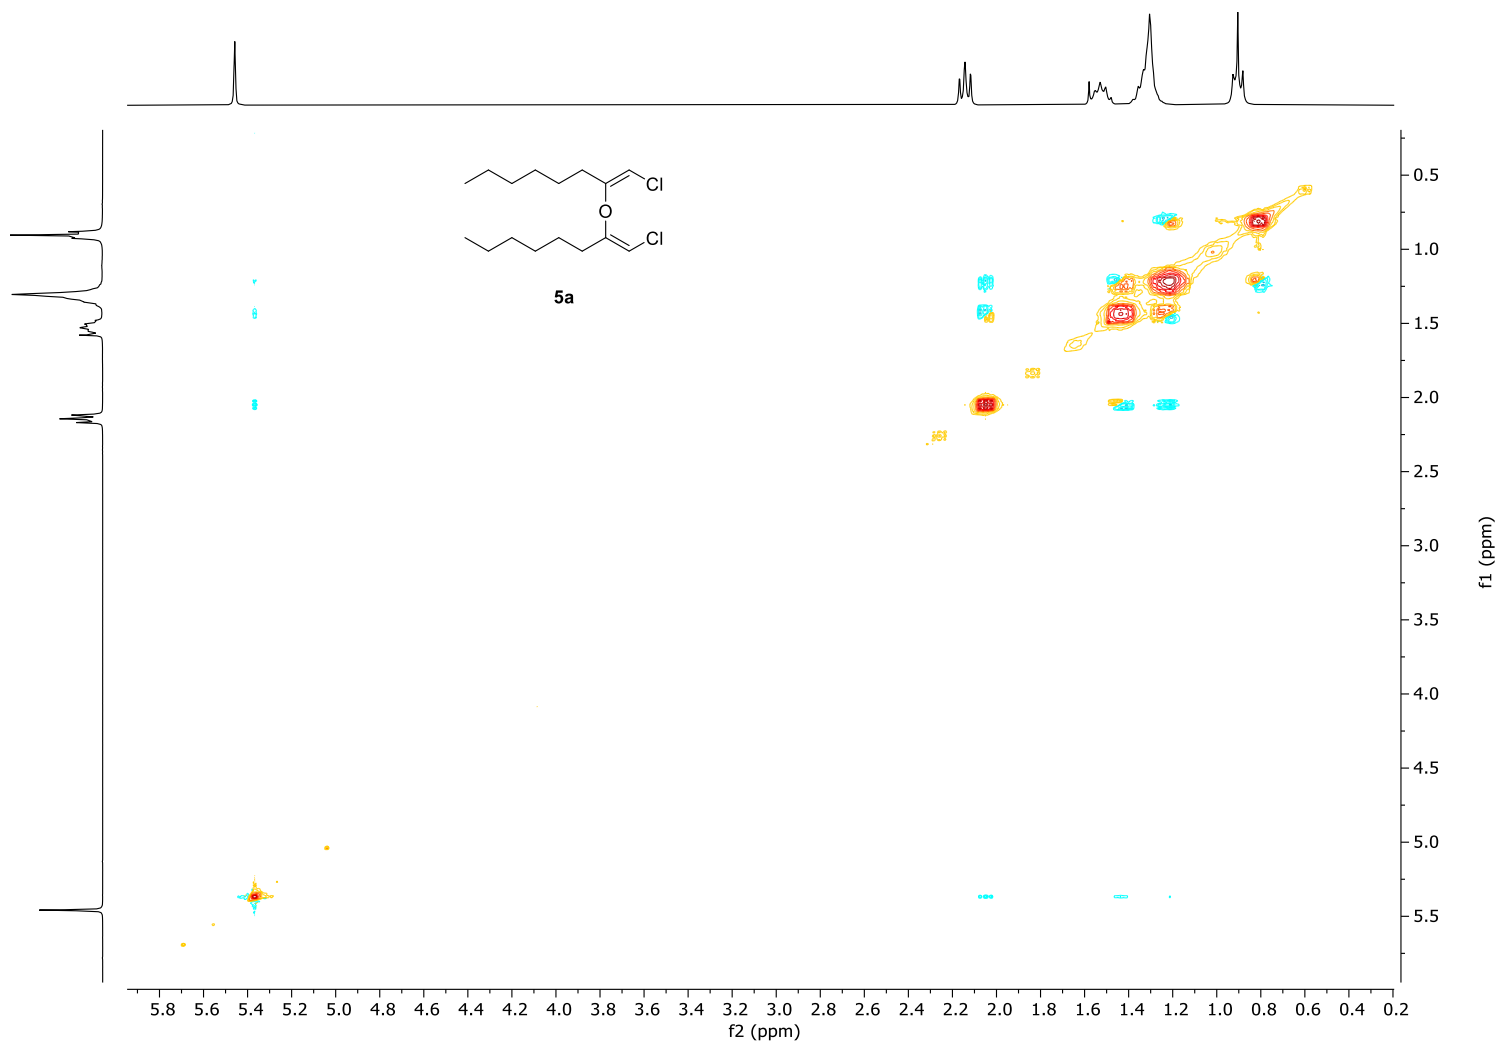

**Figure S39.** NOESY-NMR spectrum (CDCl<sub>3</sub>) of by-product **5a** detected in the hydration of **1a**.



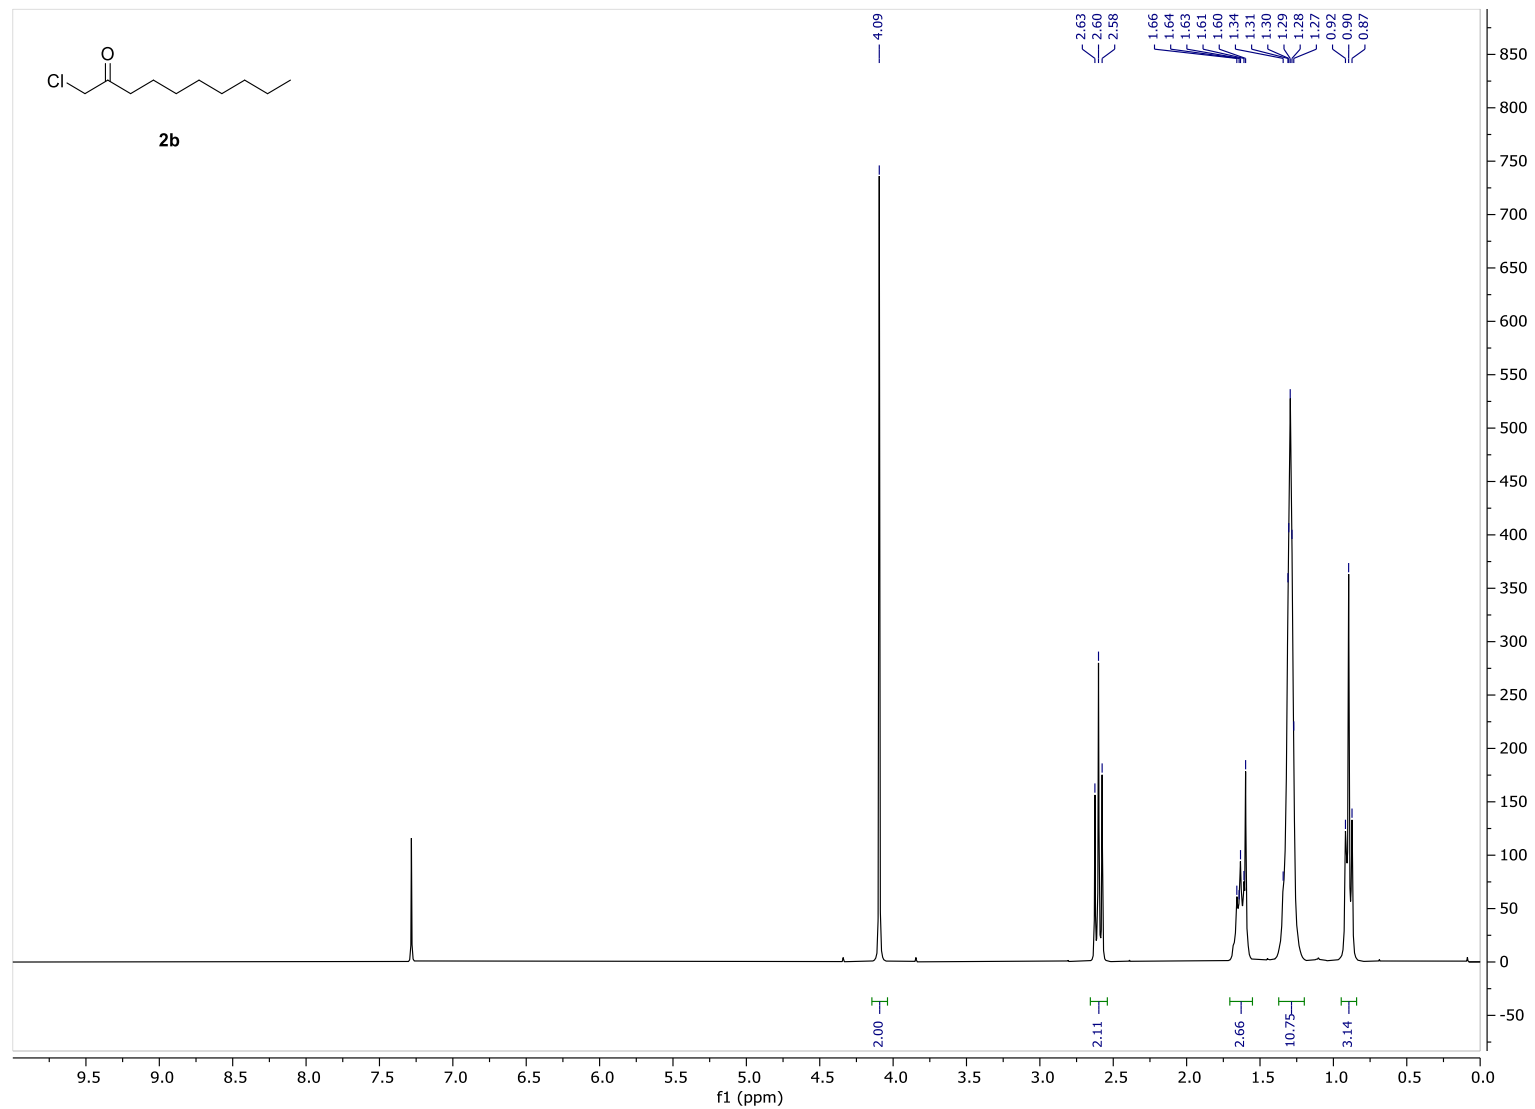

Figure S40. <sup>1</sup>H-NMR spectrum (CDCl<sub>3</sub>) of compound **2b**.

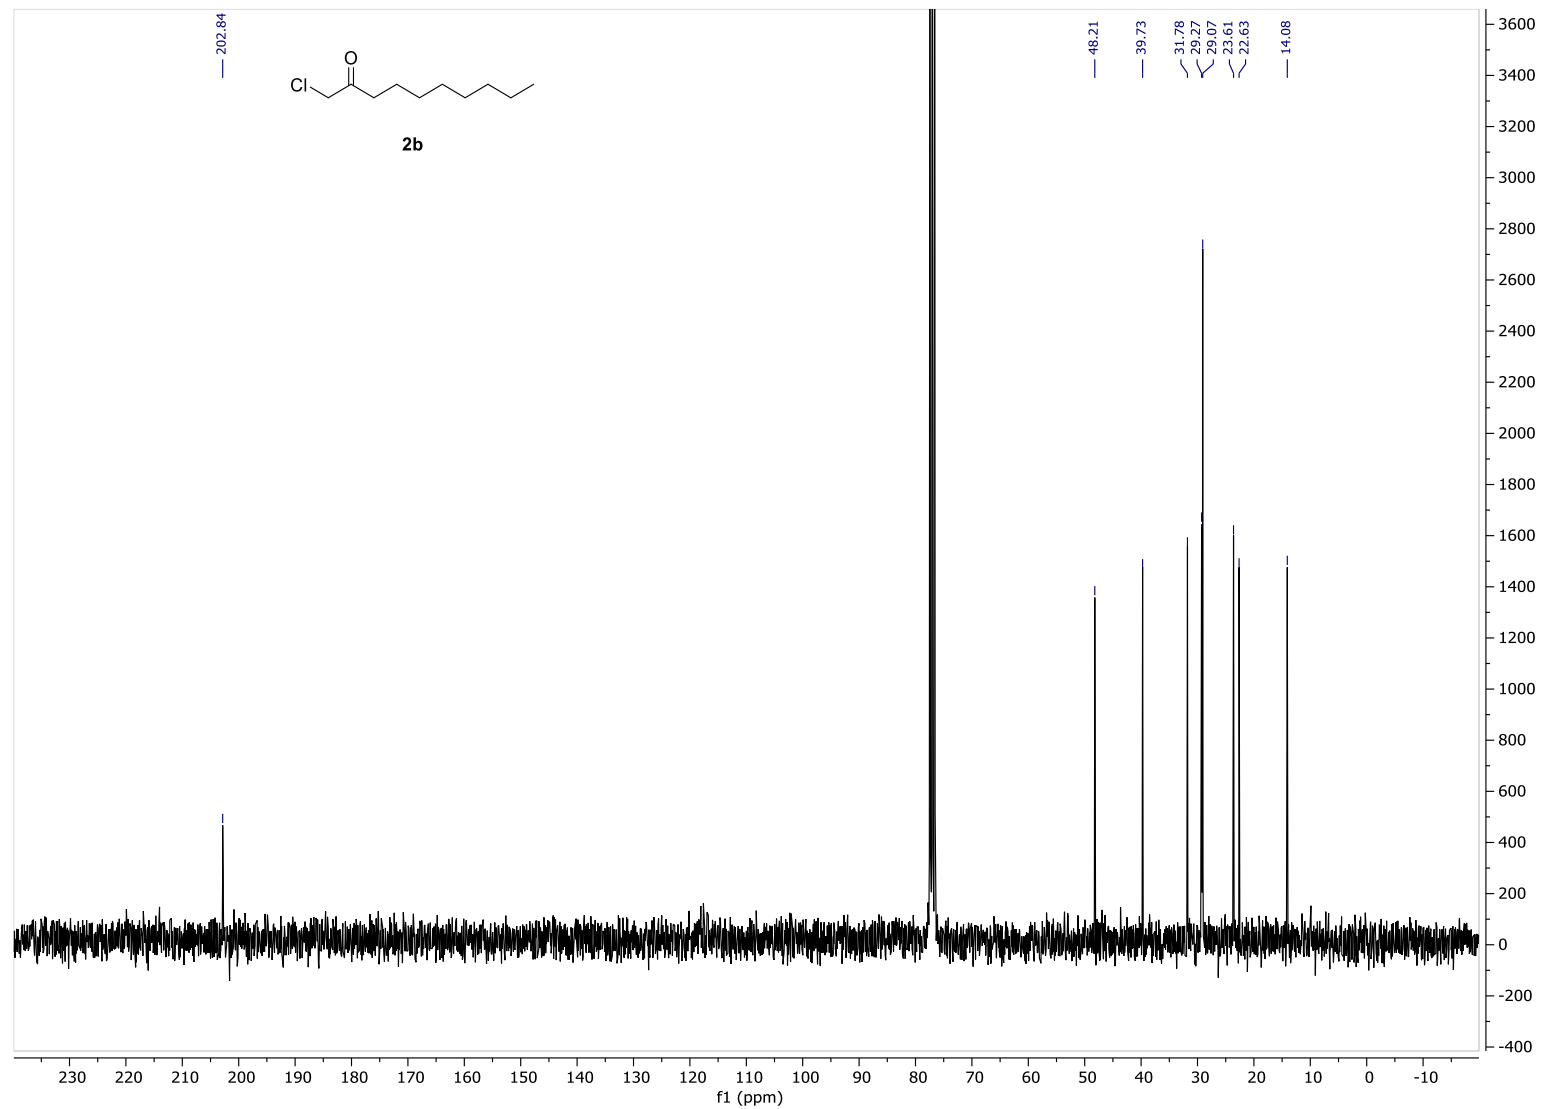

Figure S41. <sup>1</sup>H and <sup>13</sup>C-NMR spectrum (CDCl<sub>3</sub>) of compound **2b**.

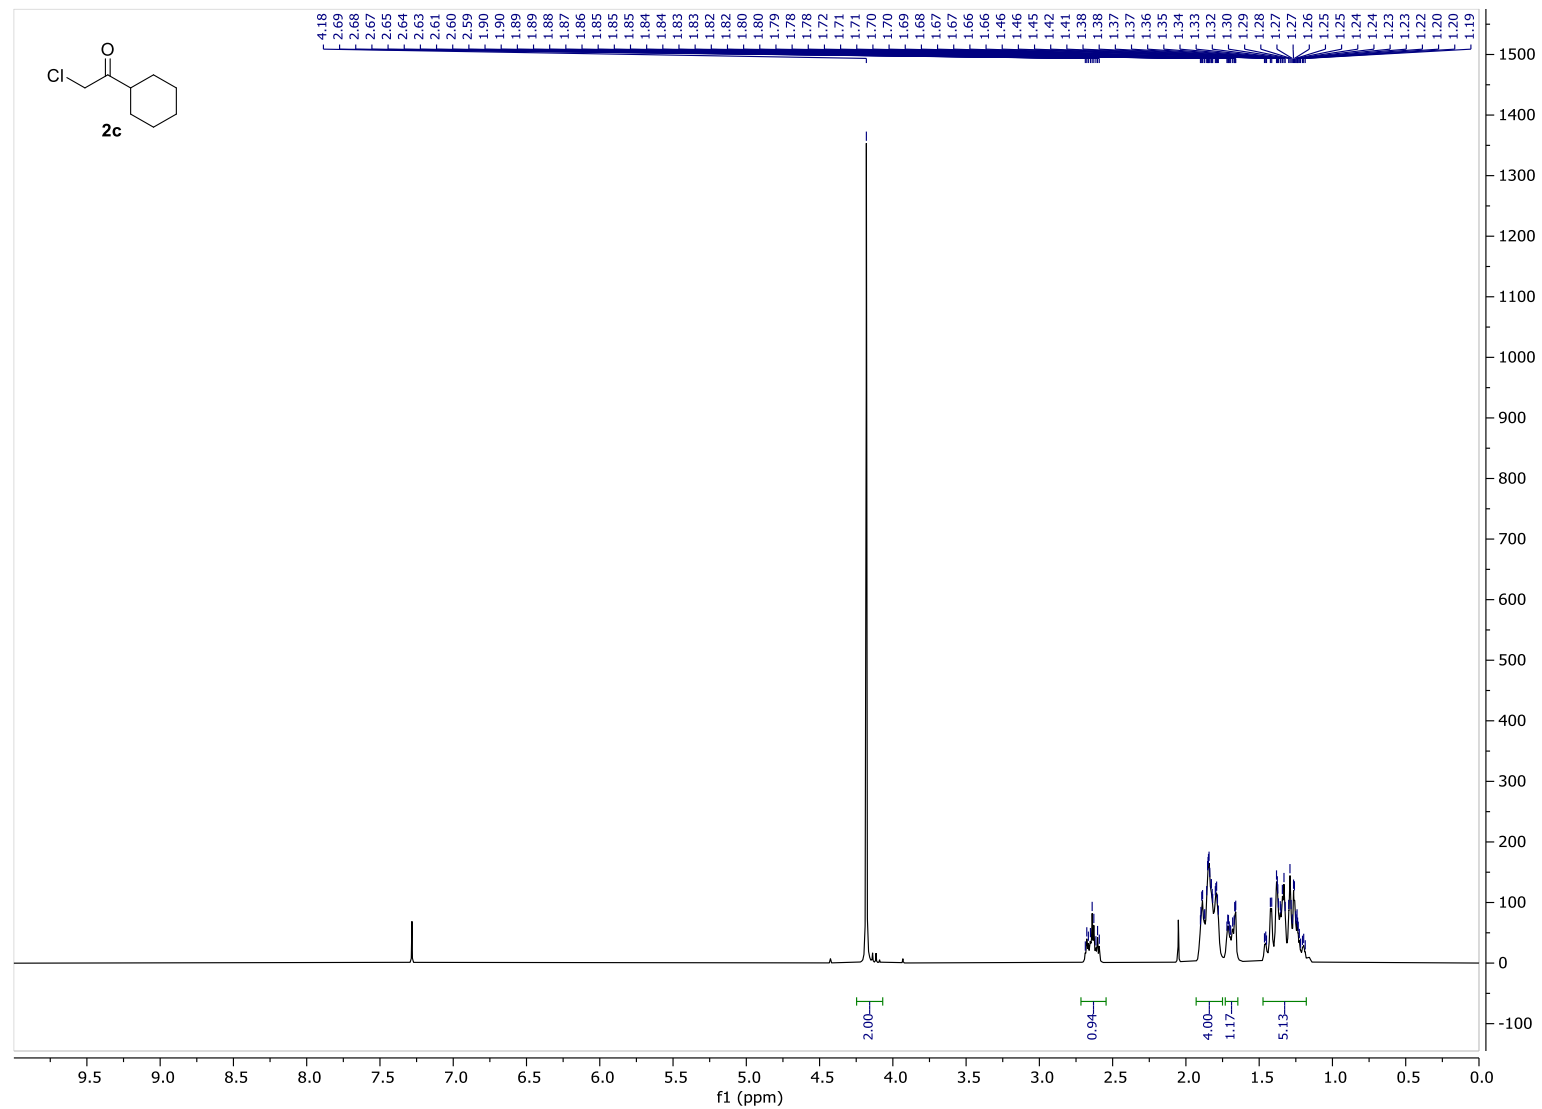

Figure S42. <sup>1</sup>H-NMR spectrum (CDCl<sub>3</sub>) of compound **2c**.

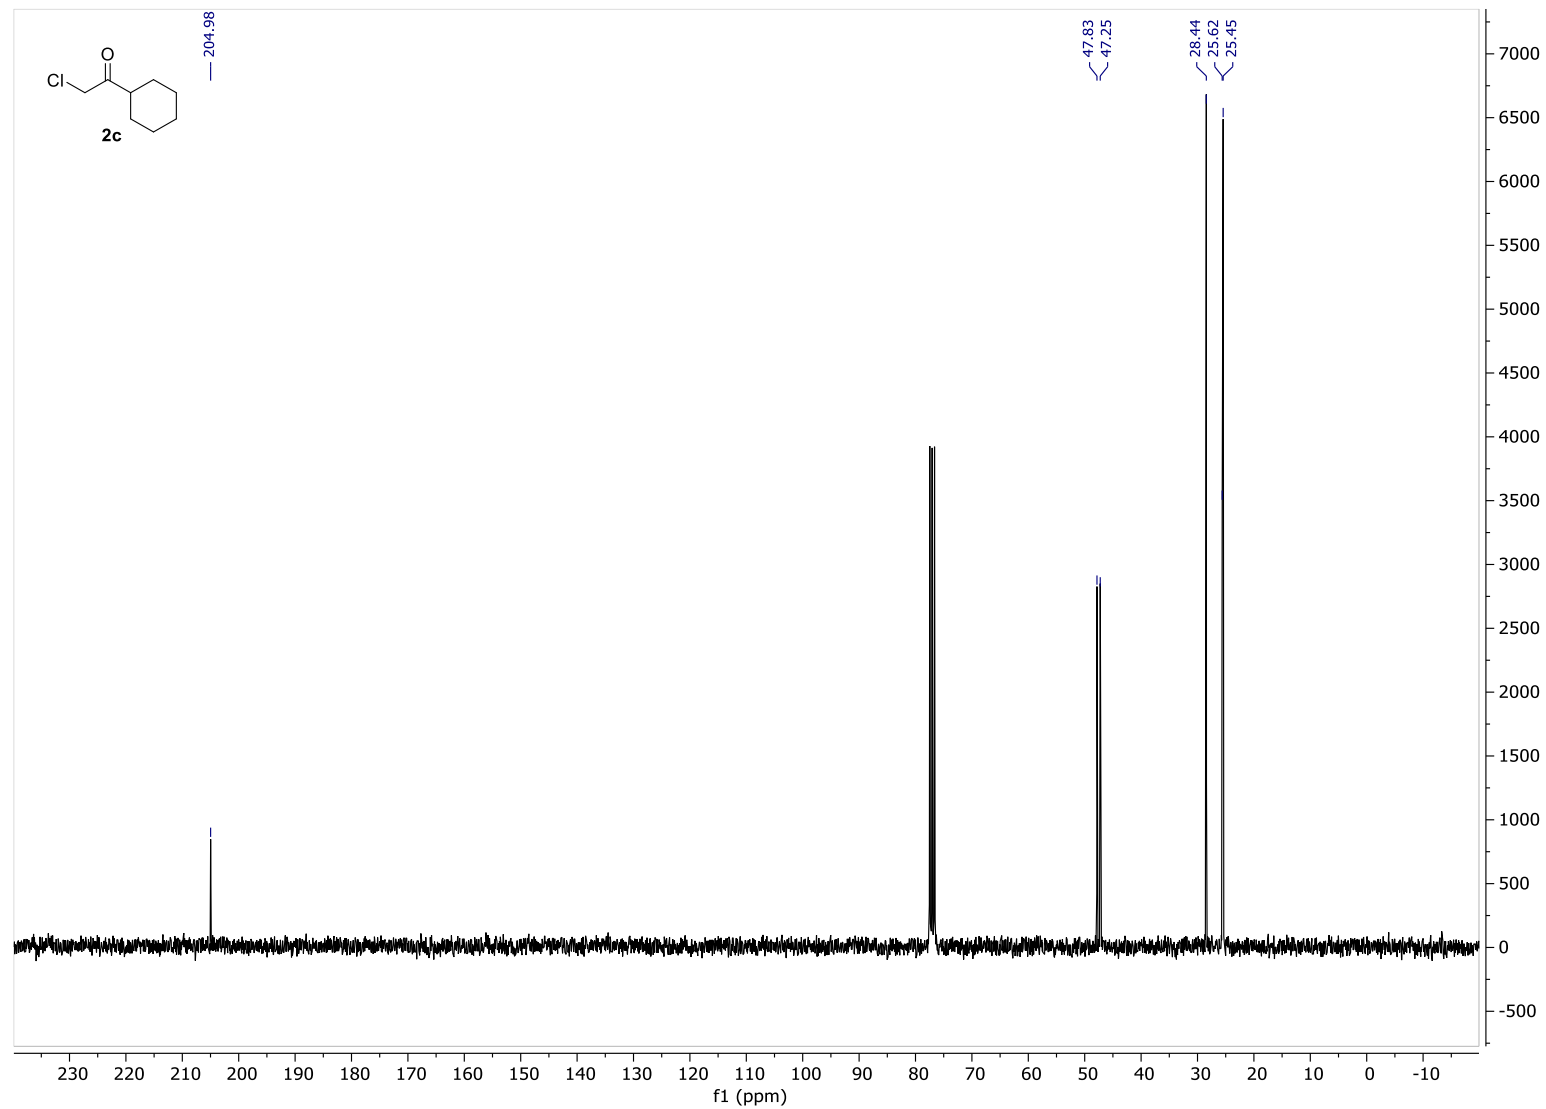

Figure S43. <sup>13</sup>C-NMR spectrum (CDCl<sub>3</sub>) of compound **2c**.

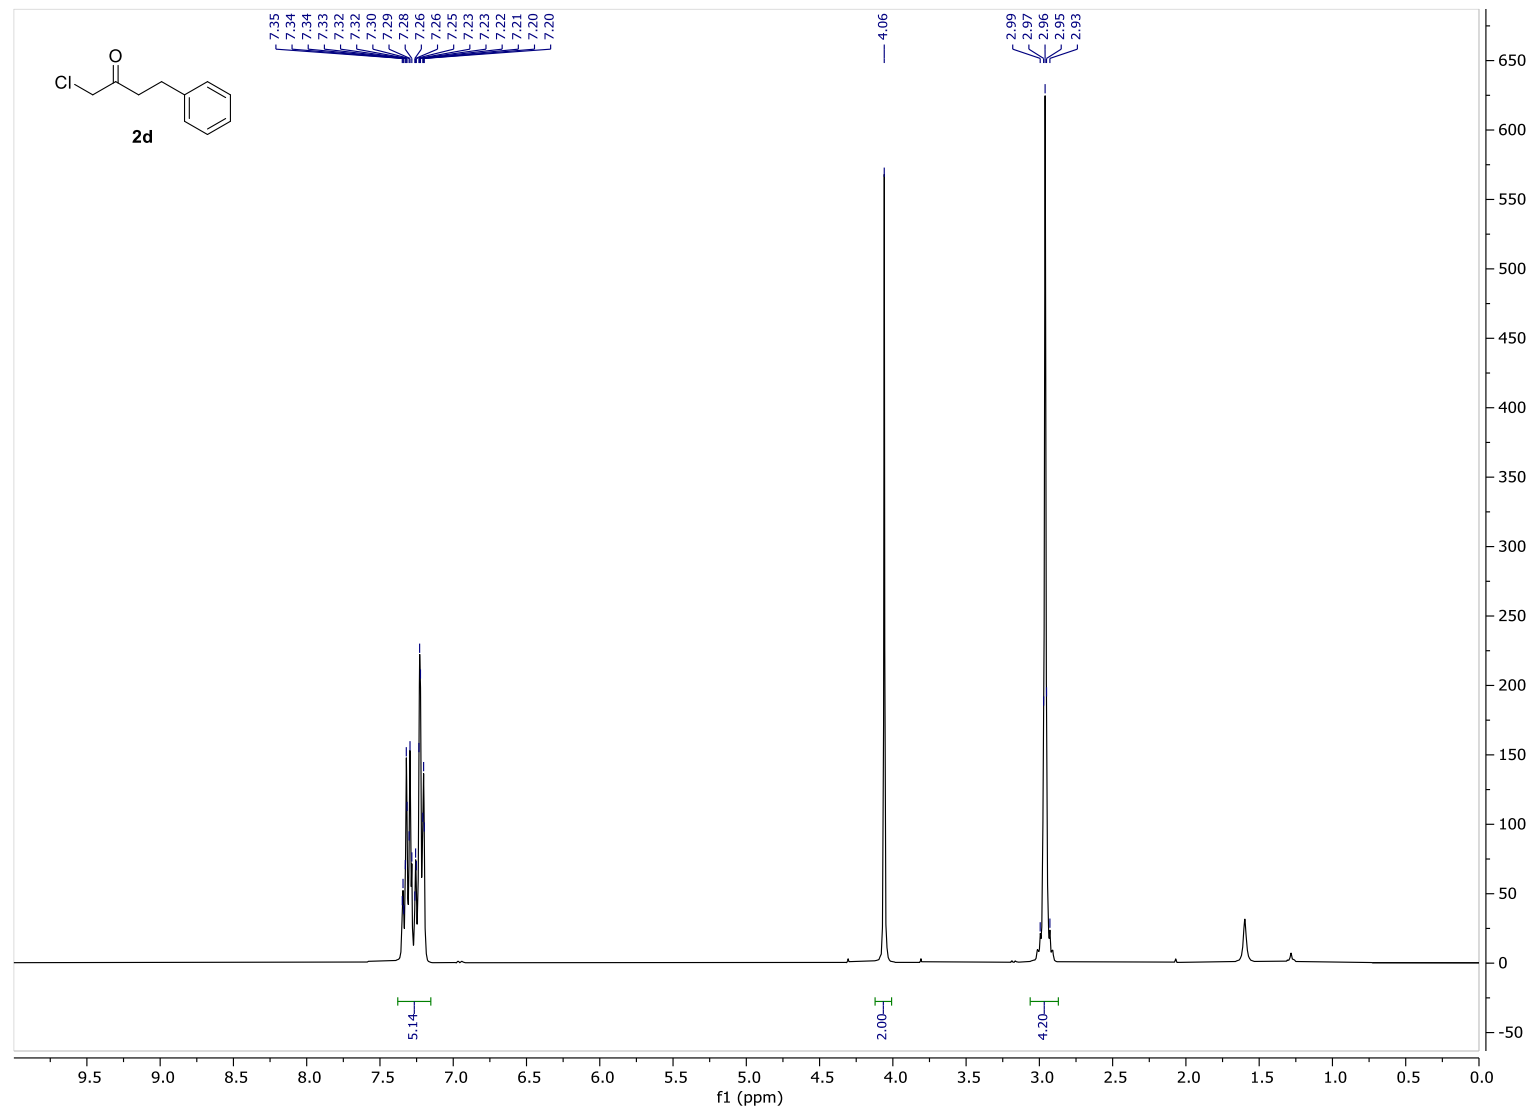

Figure S44. <sup>1</sup>H-NMR spectrum (CDCl<sub>3</sub>) of compound **2d**.

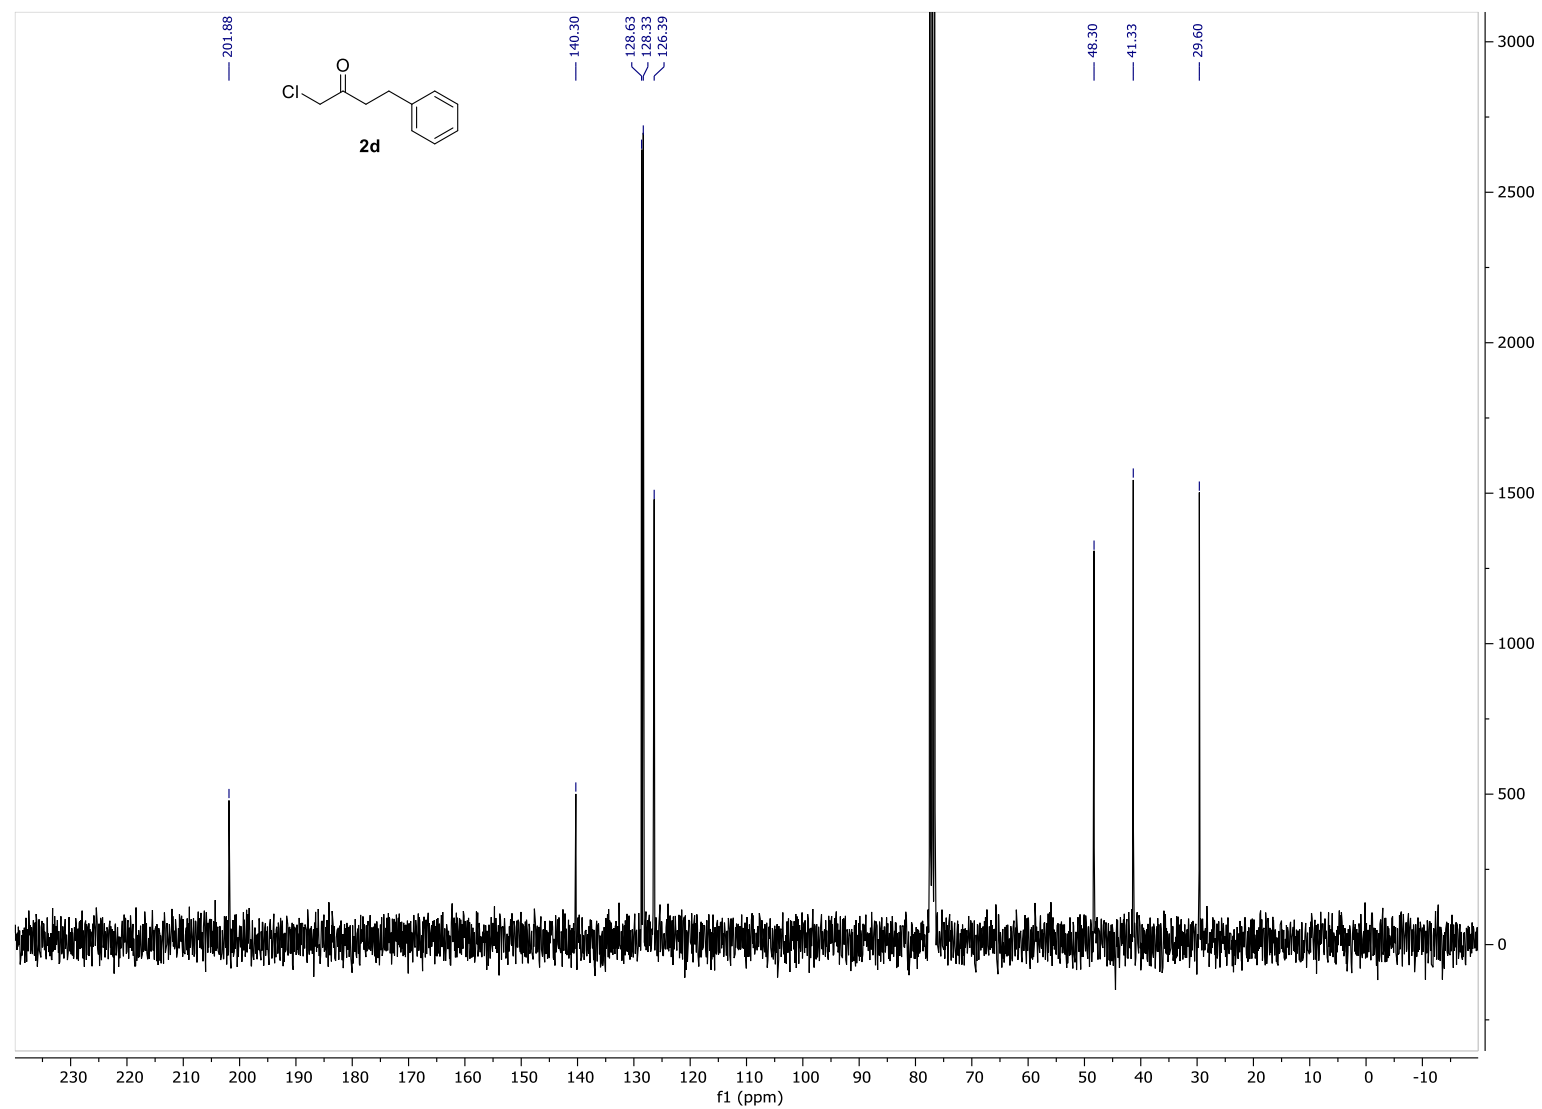

Figure S45.  $^{13}\text{C}$ -NMR spectrum ( $\text{CDCl}_3$ ) of compound **2d**.

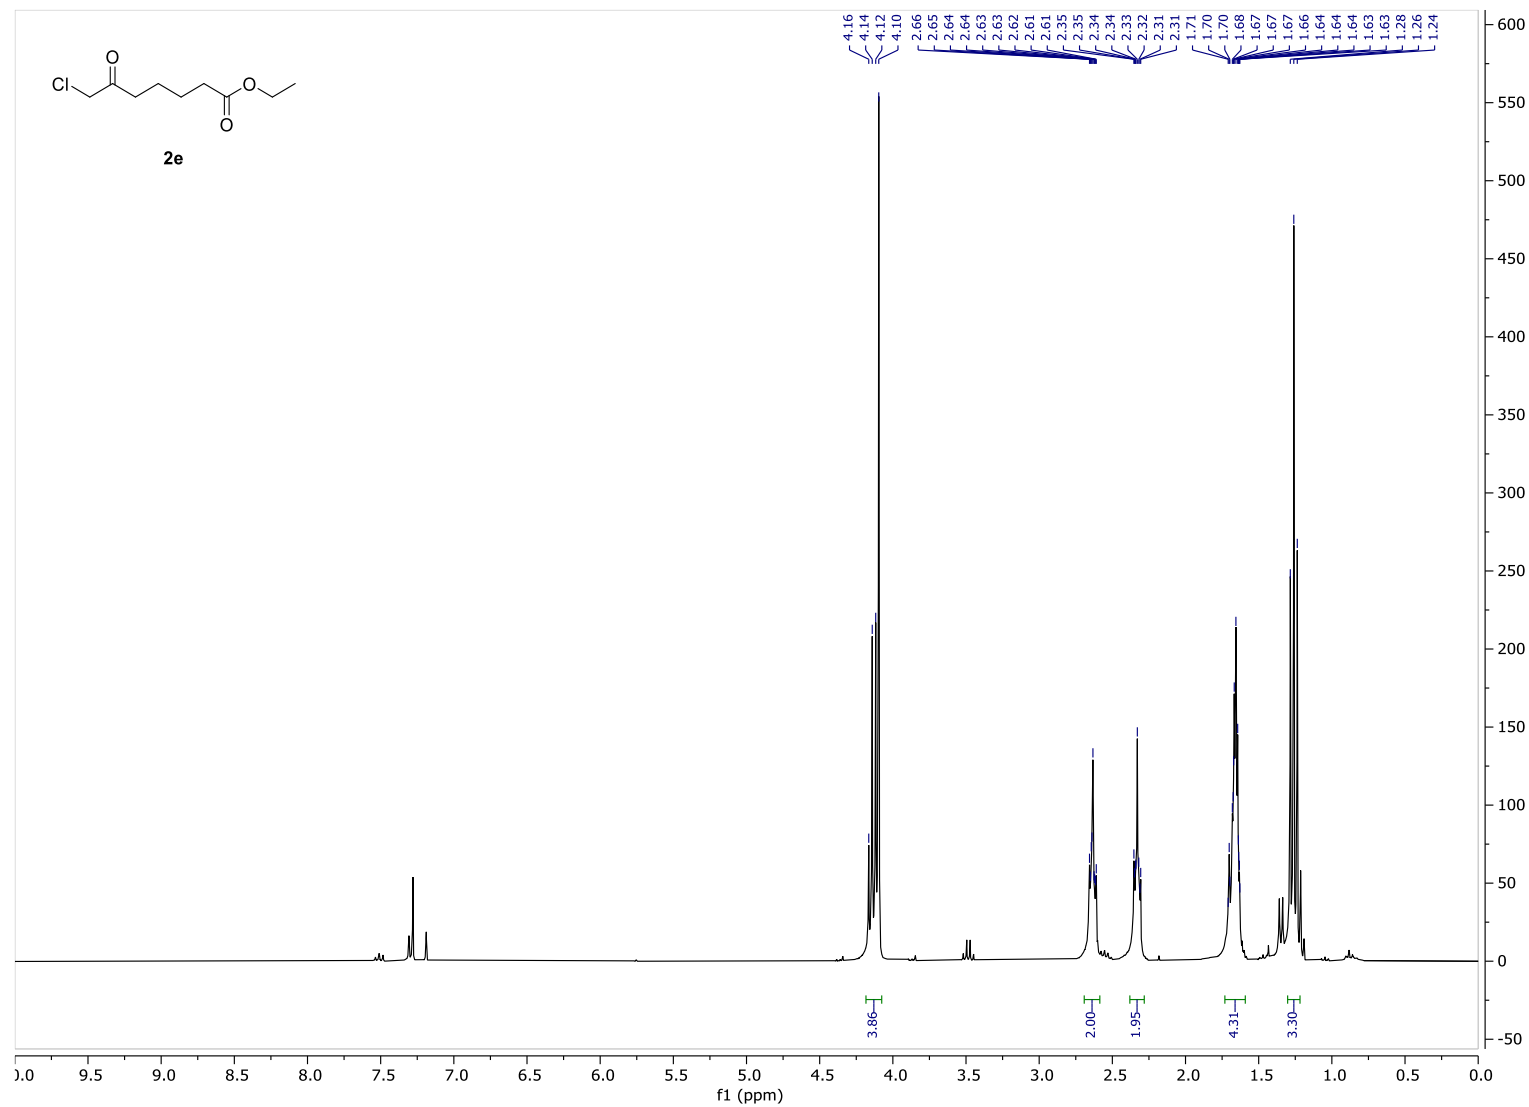

Figure S46. <sup>1</sup>H-NMR spectrum (CDCl<sub>3</sub>) of compound **2e**.

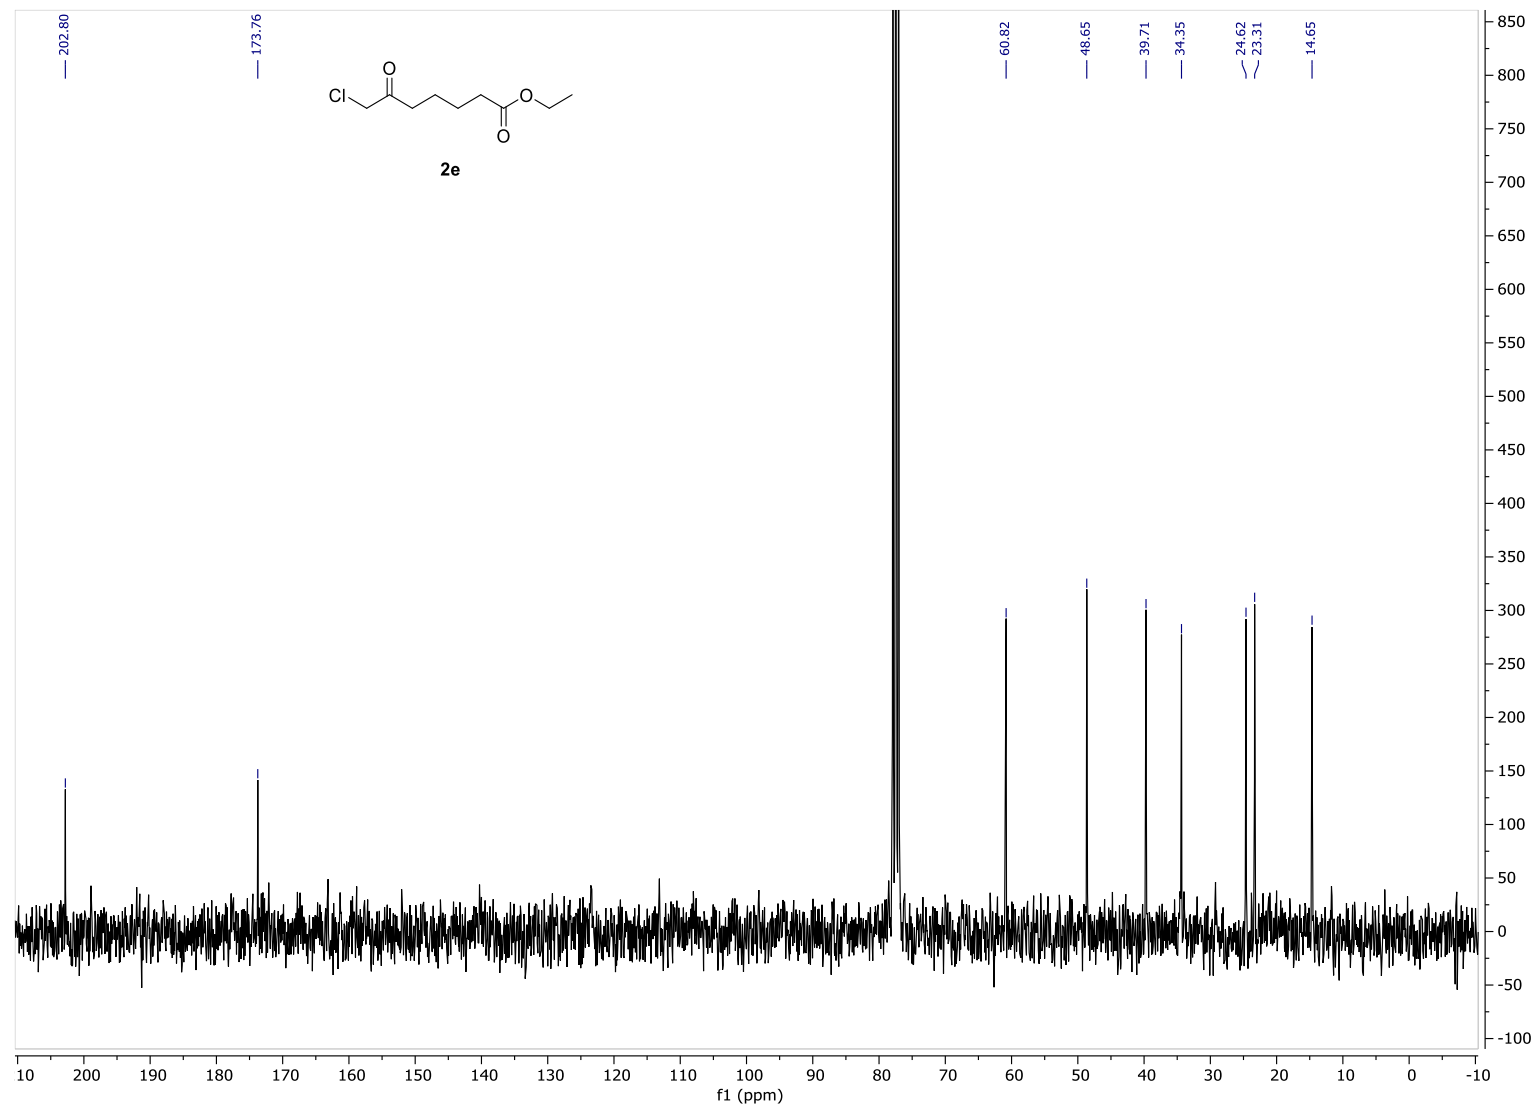

Figure S47. <sup>13</sup>C-NMR spectrum (CDCl<sub>3</sub>) of compound **2e**.



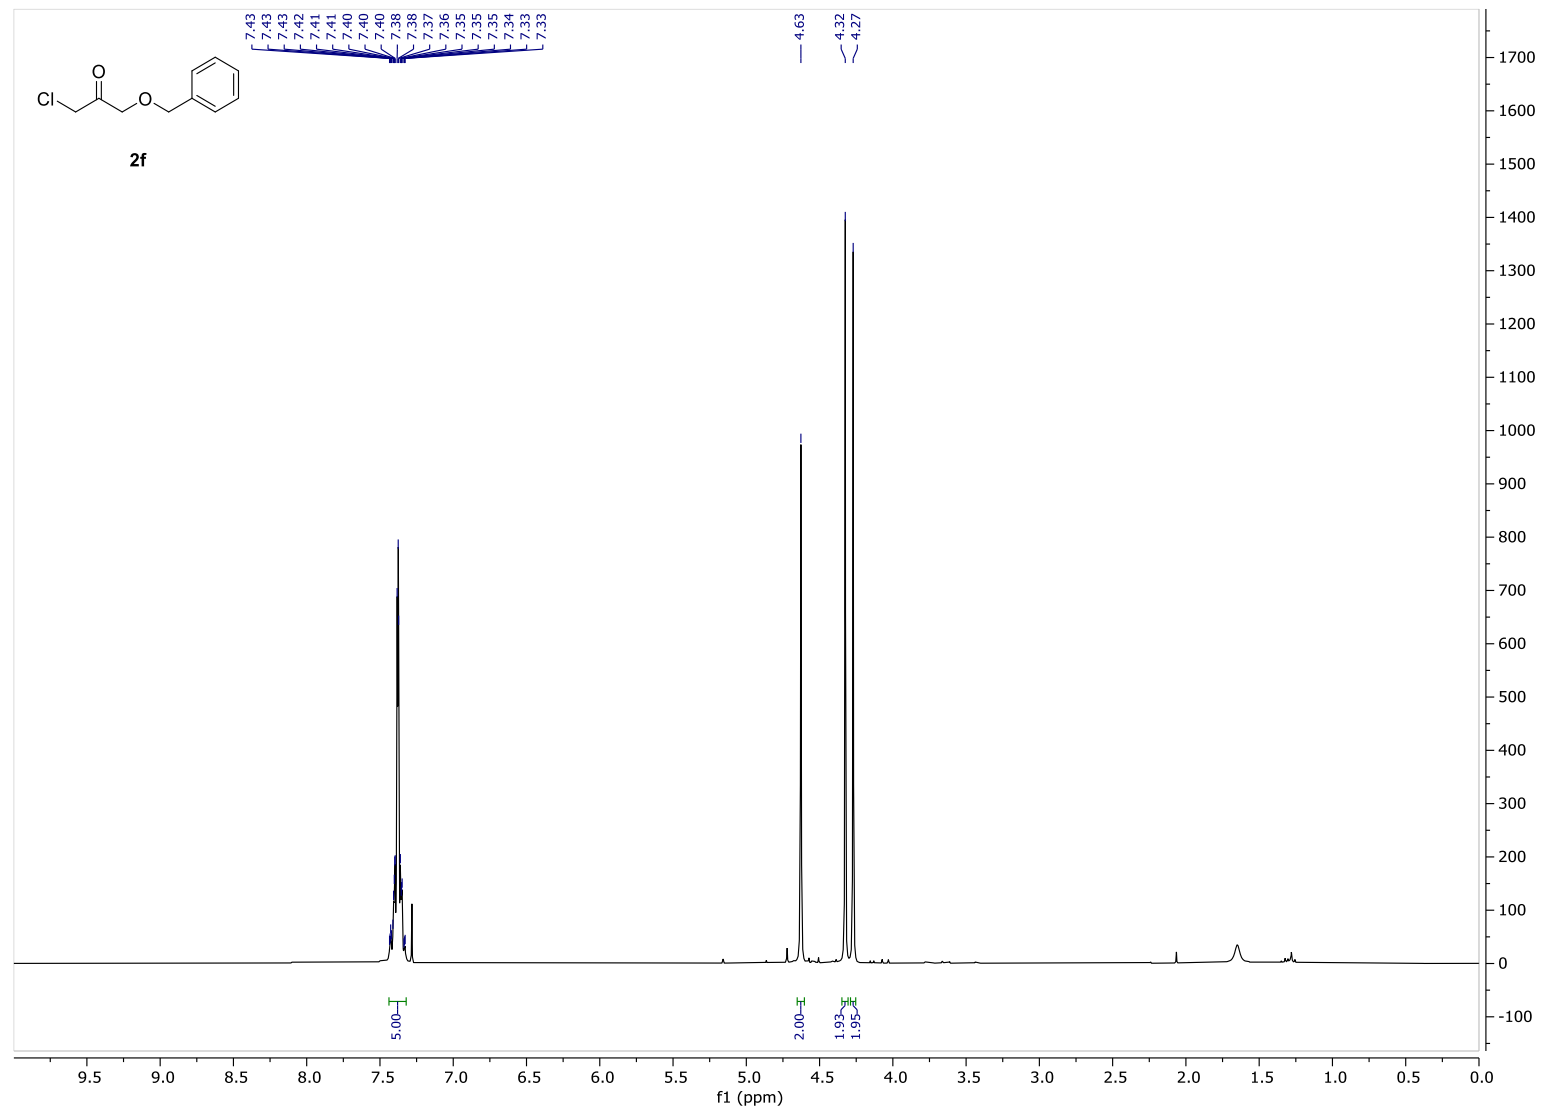

Figure S48. <sup>1</sup>H-NMR spectrum (CDCl<sub>3</sub>) of compound **2f**.

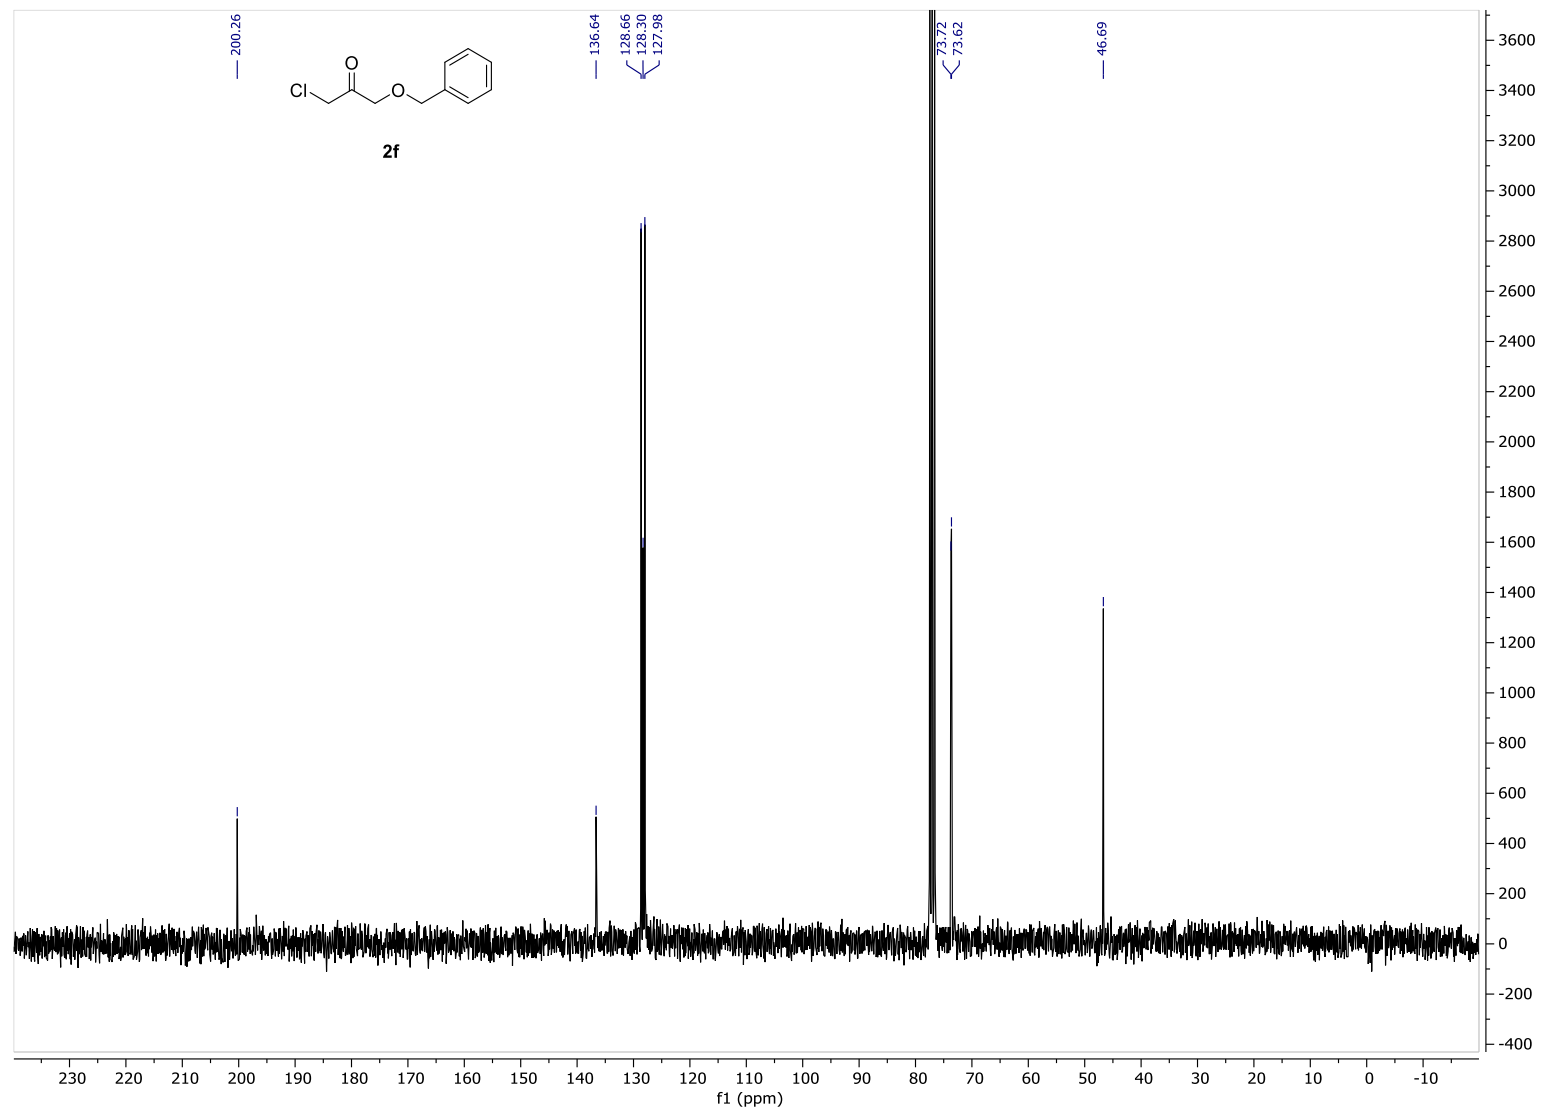

Figure S49.  $^{13}\text{C}$ -NMR spectrum ( $\text{CDCl}_3$ ) of compound **2f**.

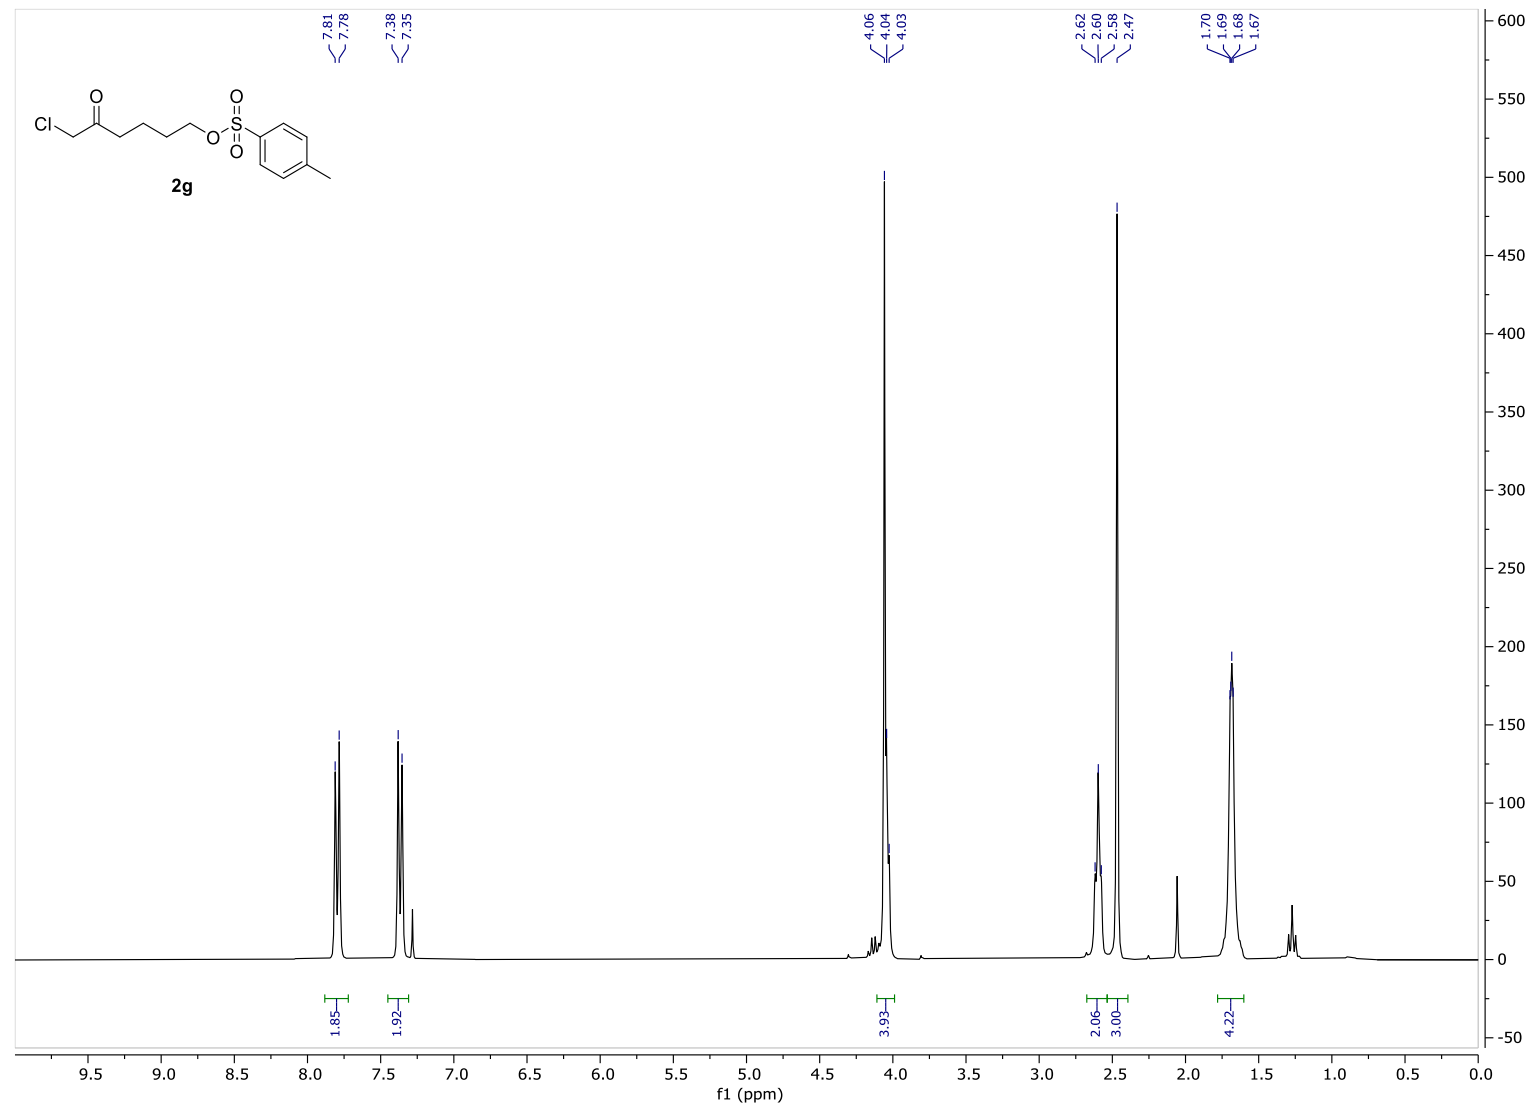

**Figure S50.** <sup>1</sup>H-NMR spectrum (CDCl<sub>3</sub>) of compound **2g**.

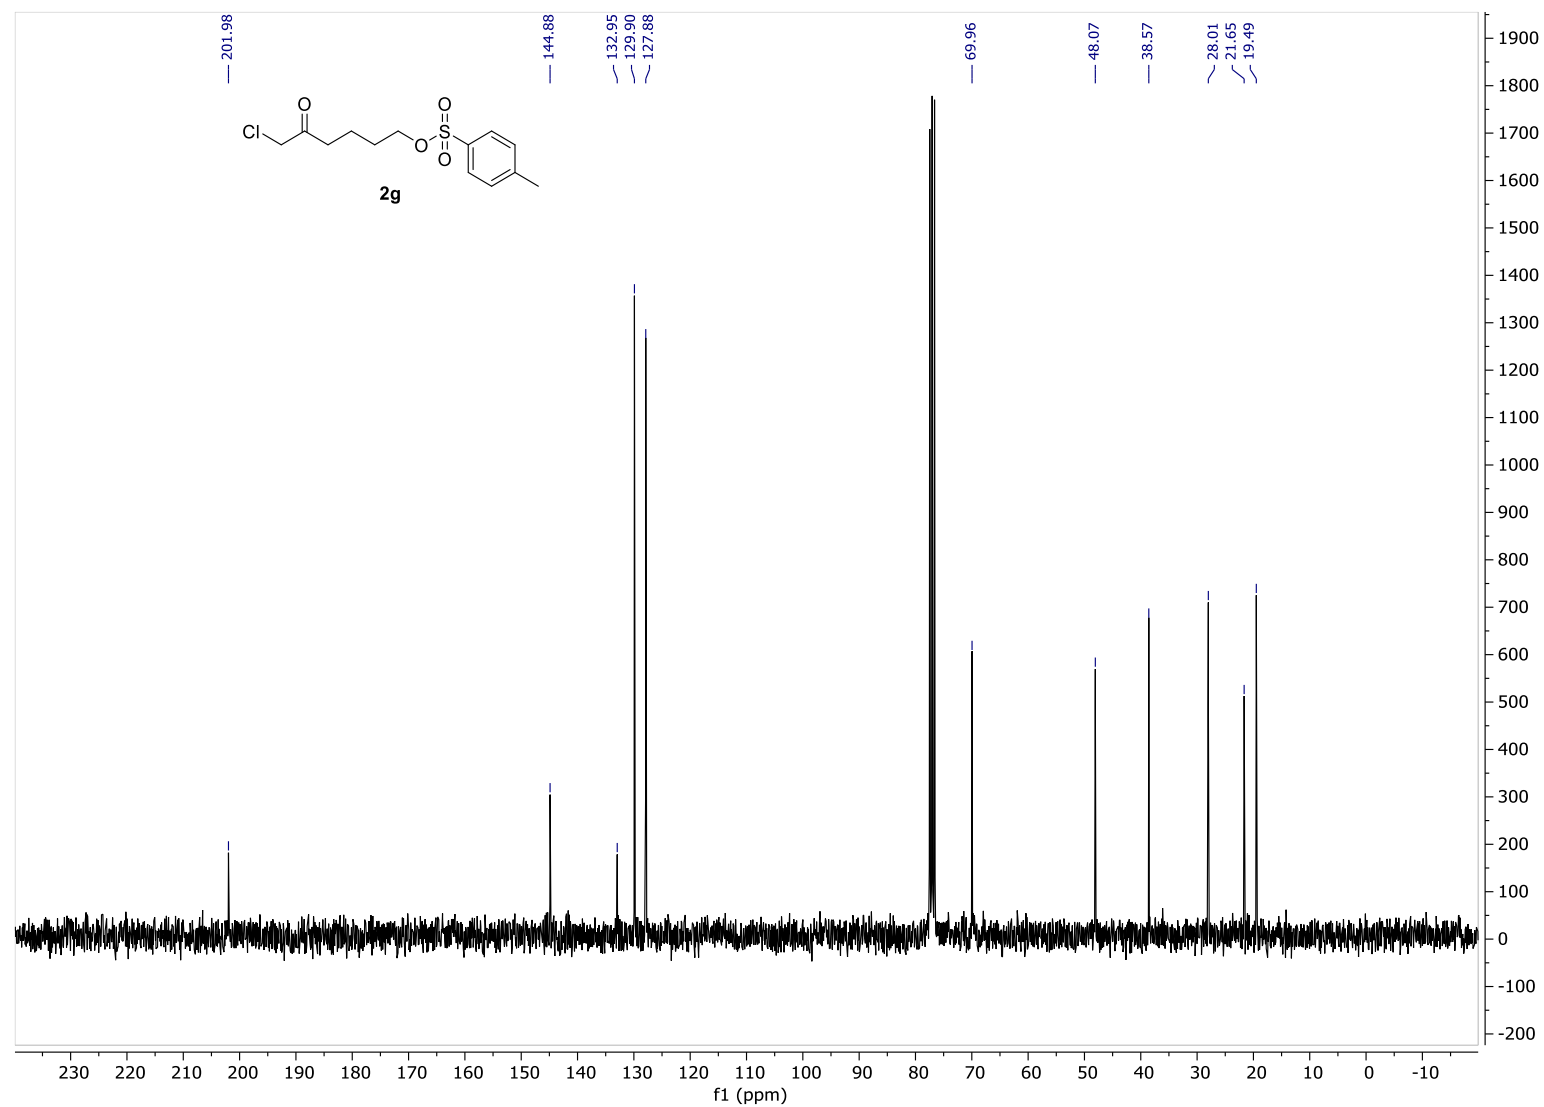

Figure S51. <sup>13</sup>C-NMR spectrum (CDCl<sub>3</sub>) of compound **2g**.

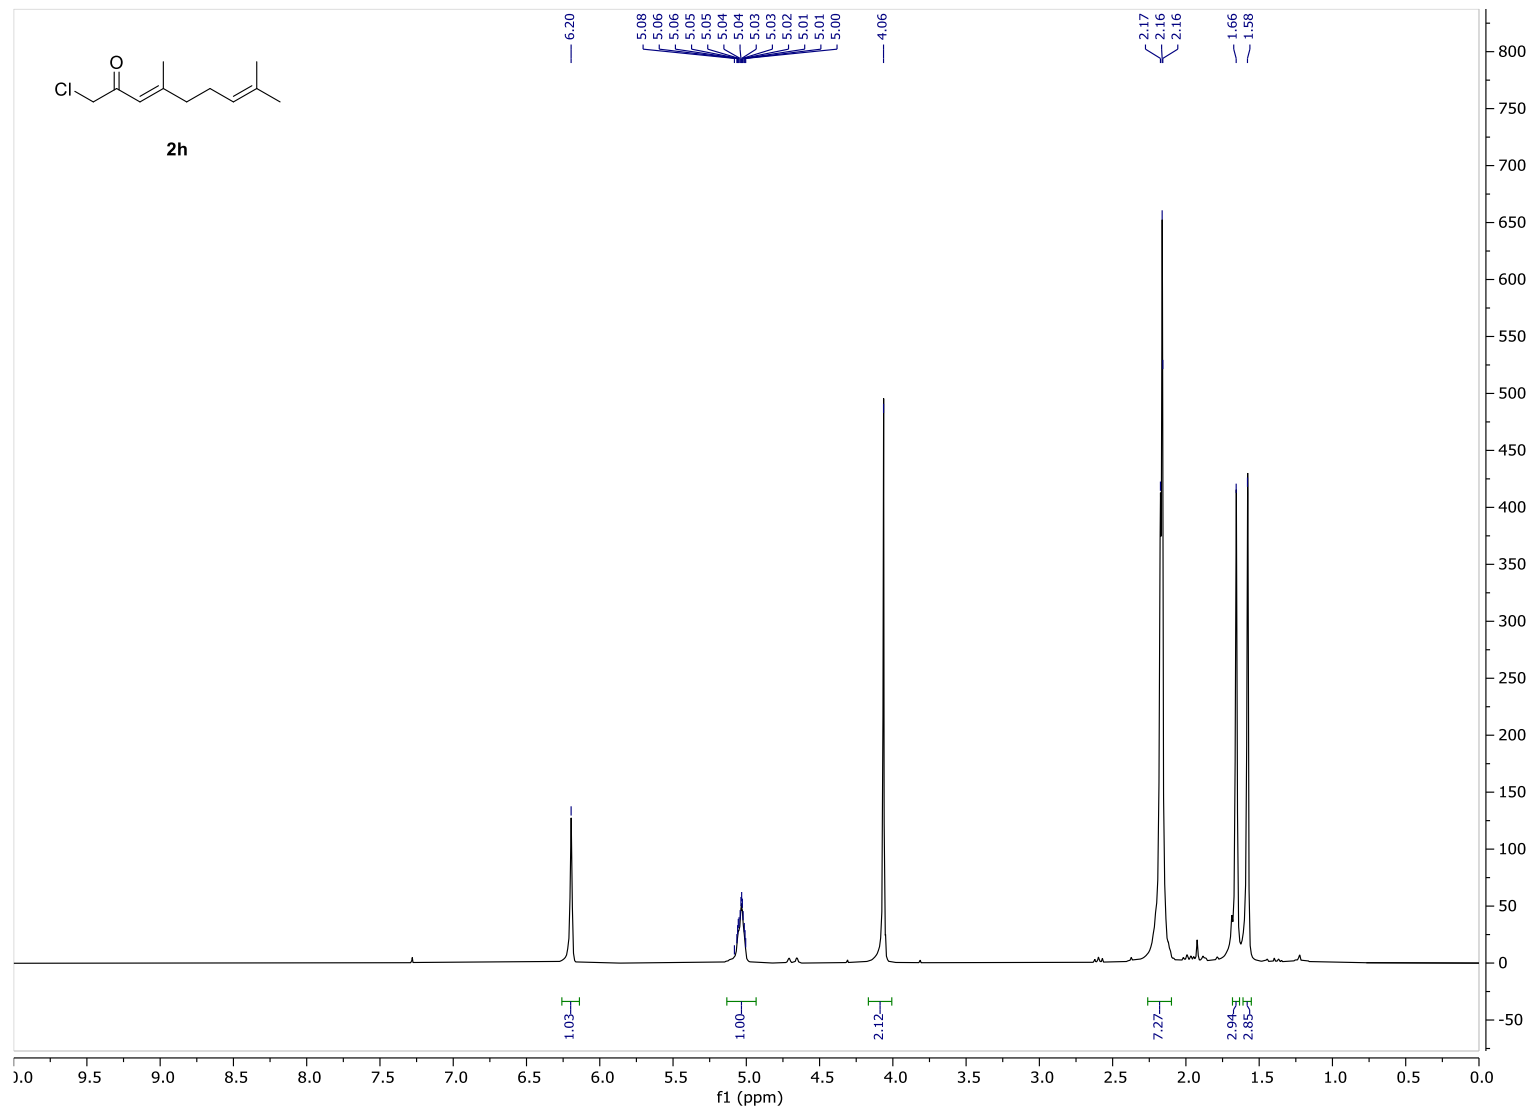

Figure S52. <sup>1</sup>H-NMR spectrum (CDCl<sub>3</sub>) of compound **2h**.

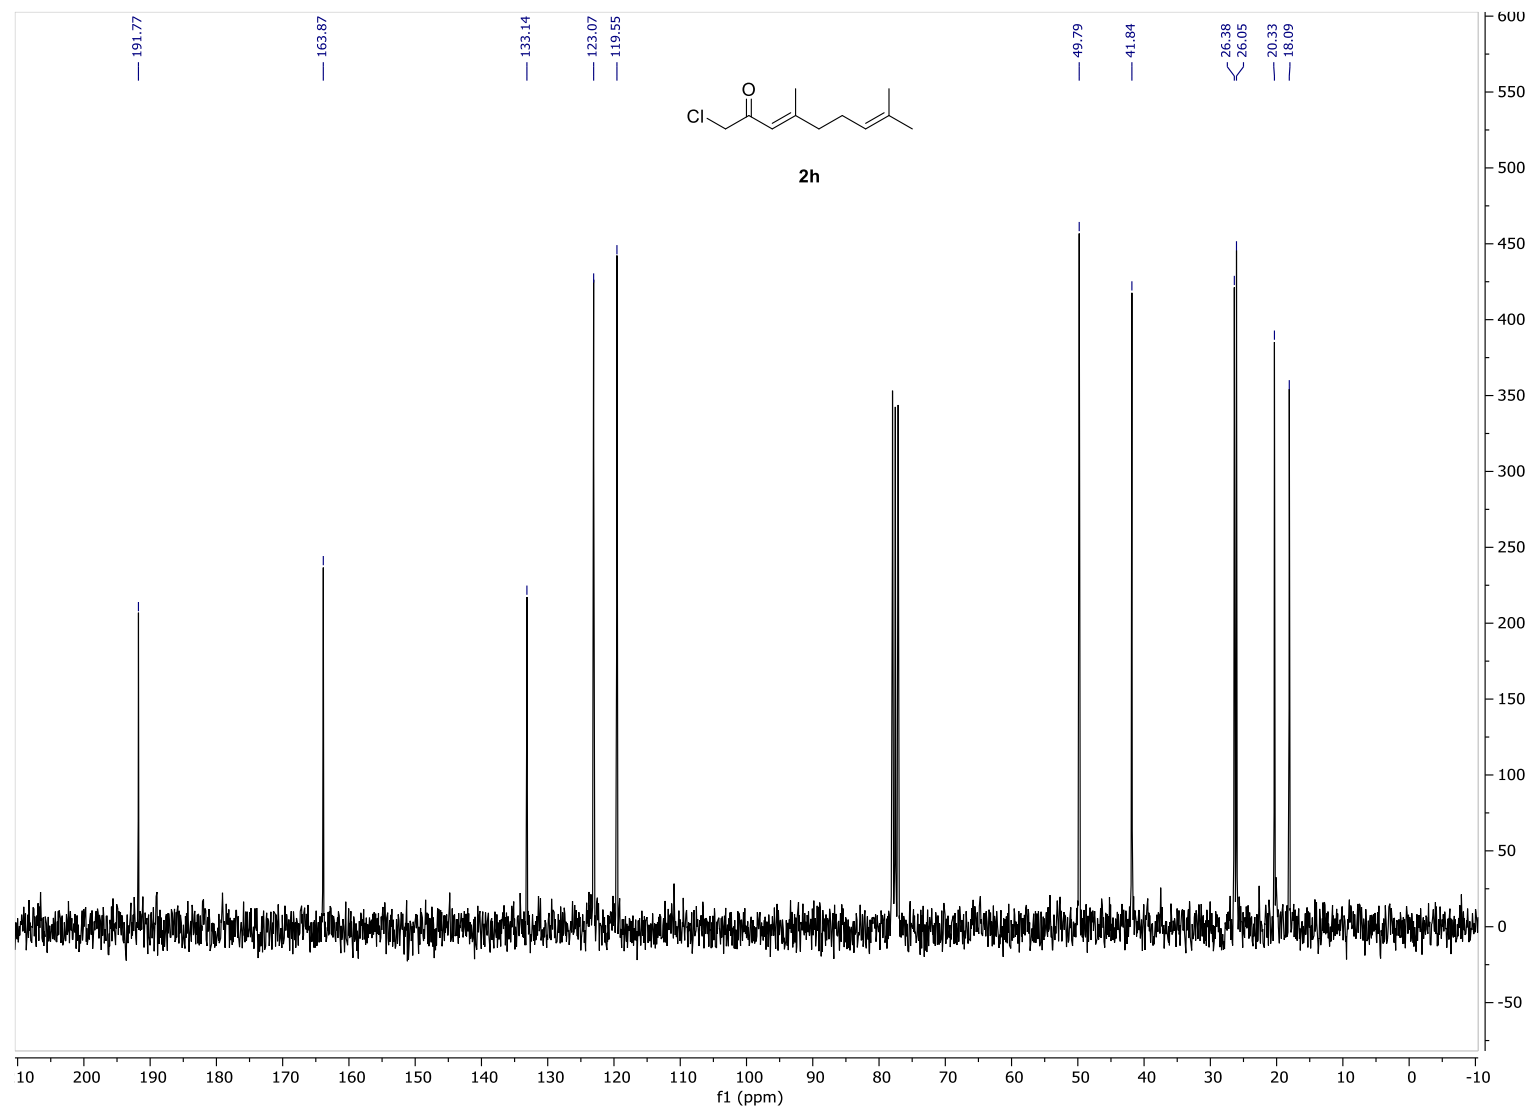

Figure S53. <sup>13</sup>C-NMR spectrum (CDCl<sub>3</sub>) of compound **2h**.

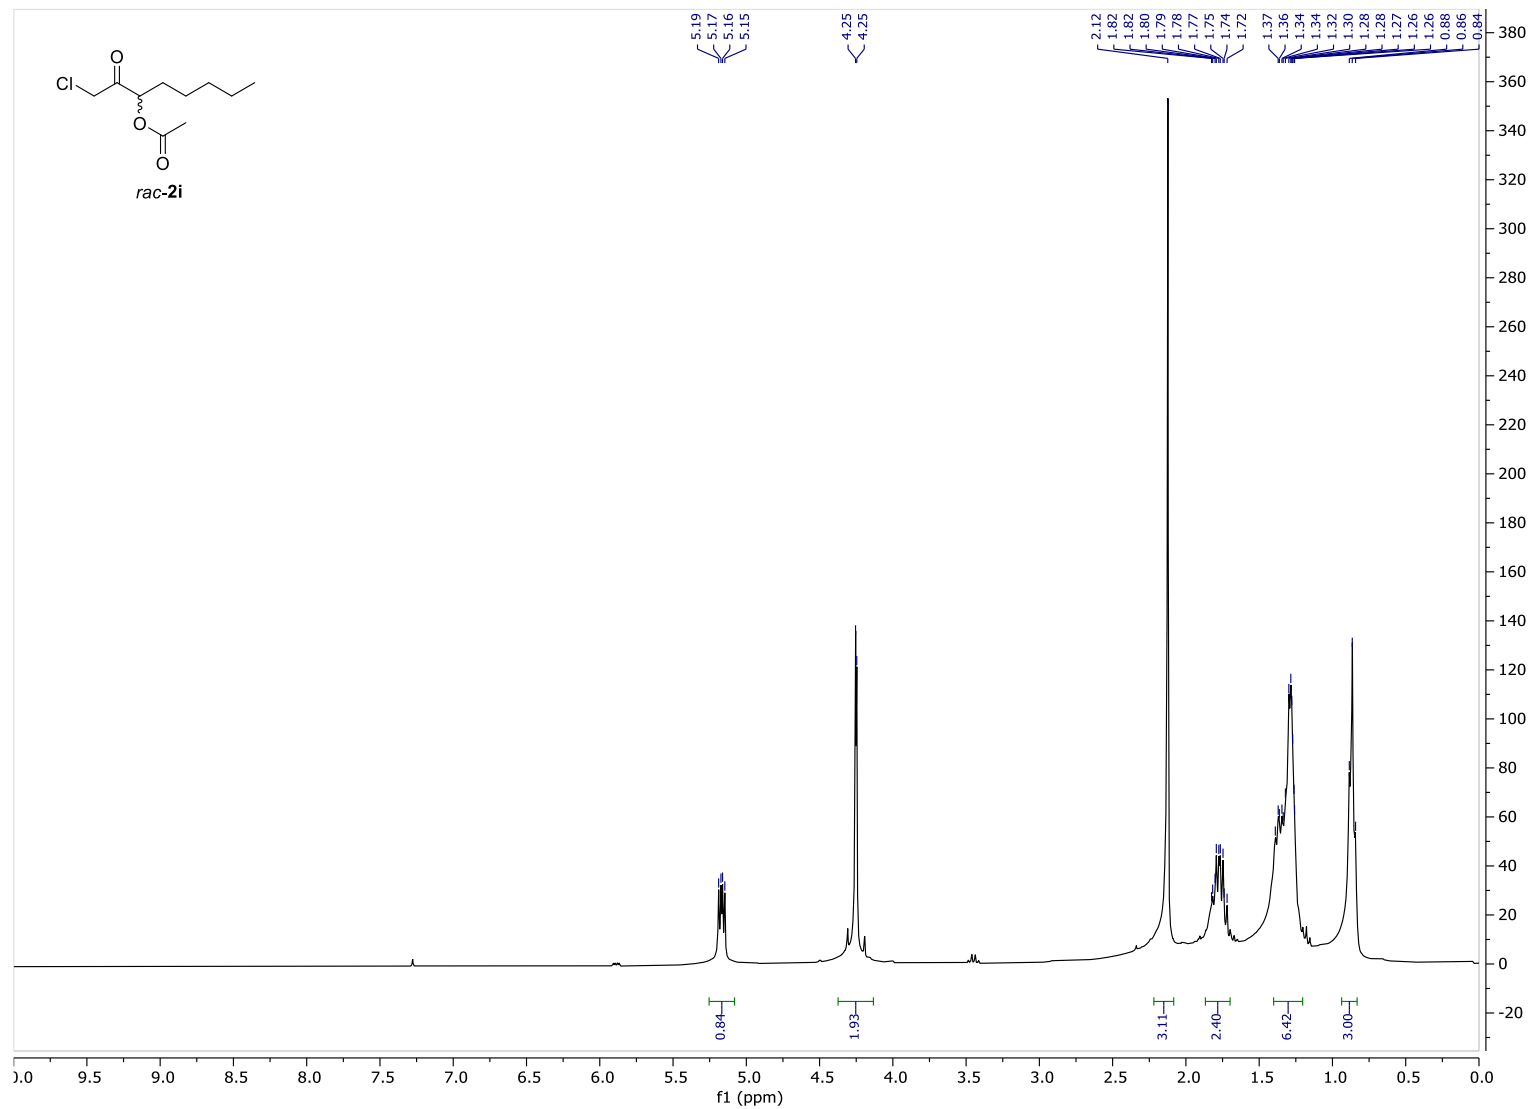

Figure S54. <sup>1</sup>H-NMR spectrum (CDCl<sub>3</sub>) of compound **2i**.

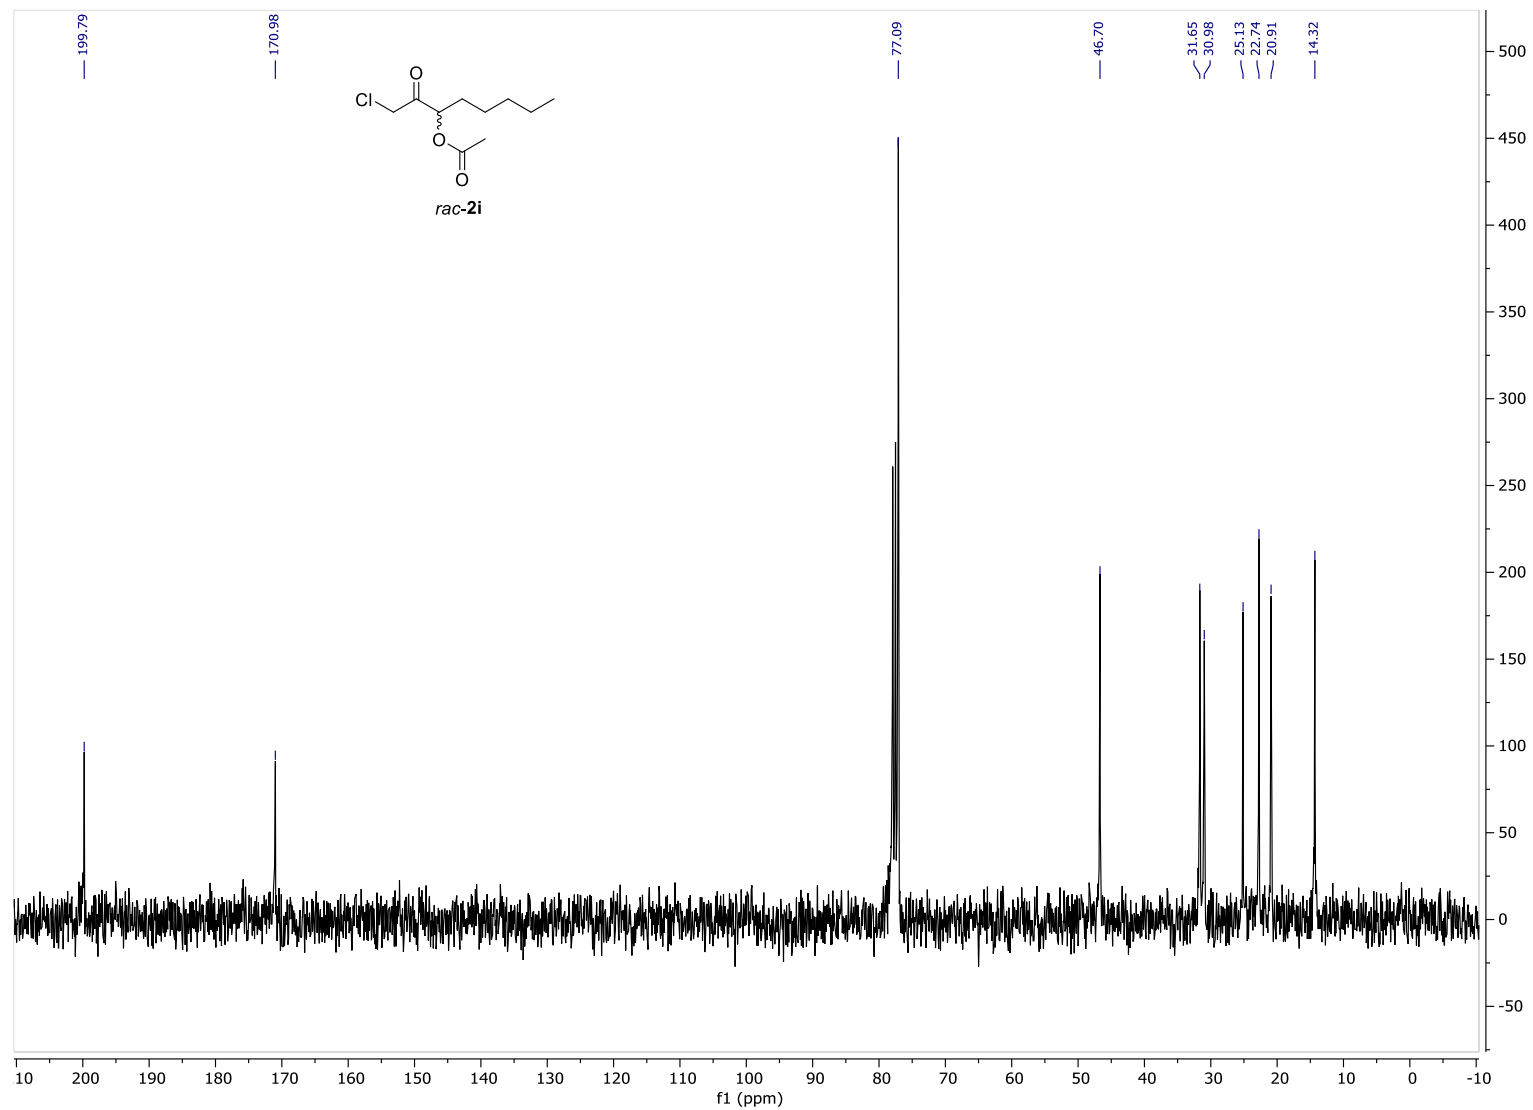

Figure S55.  $^{13}\text{C}$ -NMR spectrum ( $\text{CDCl}_3$ ) of compound **2i**.



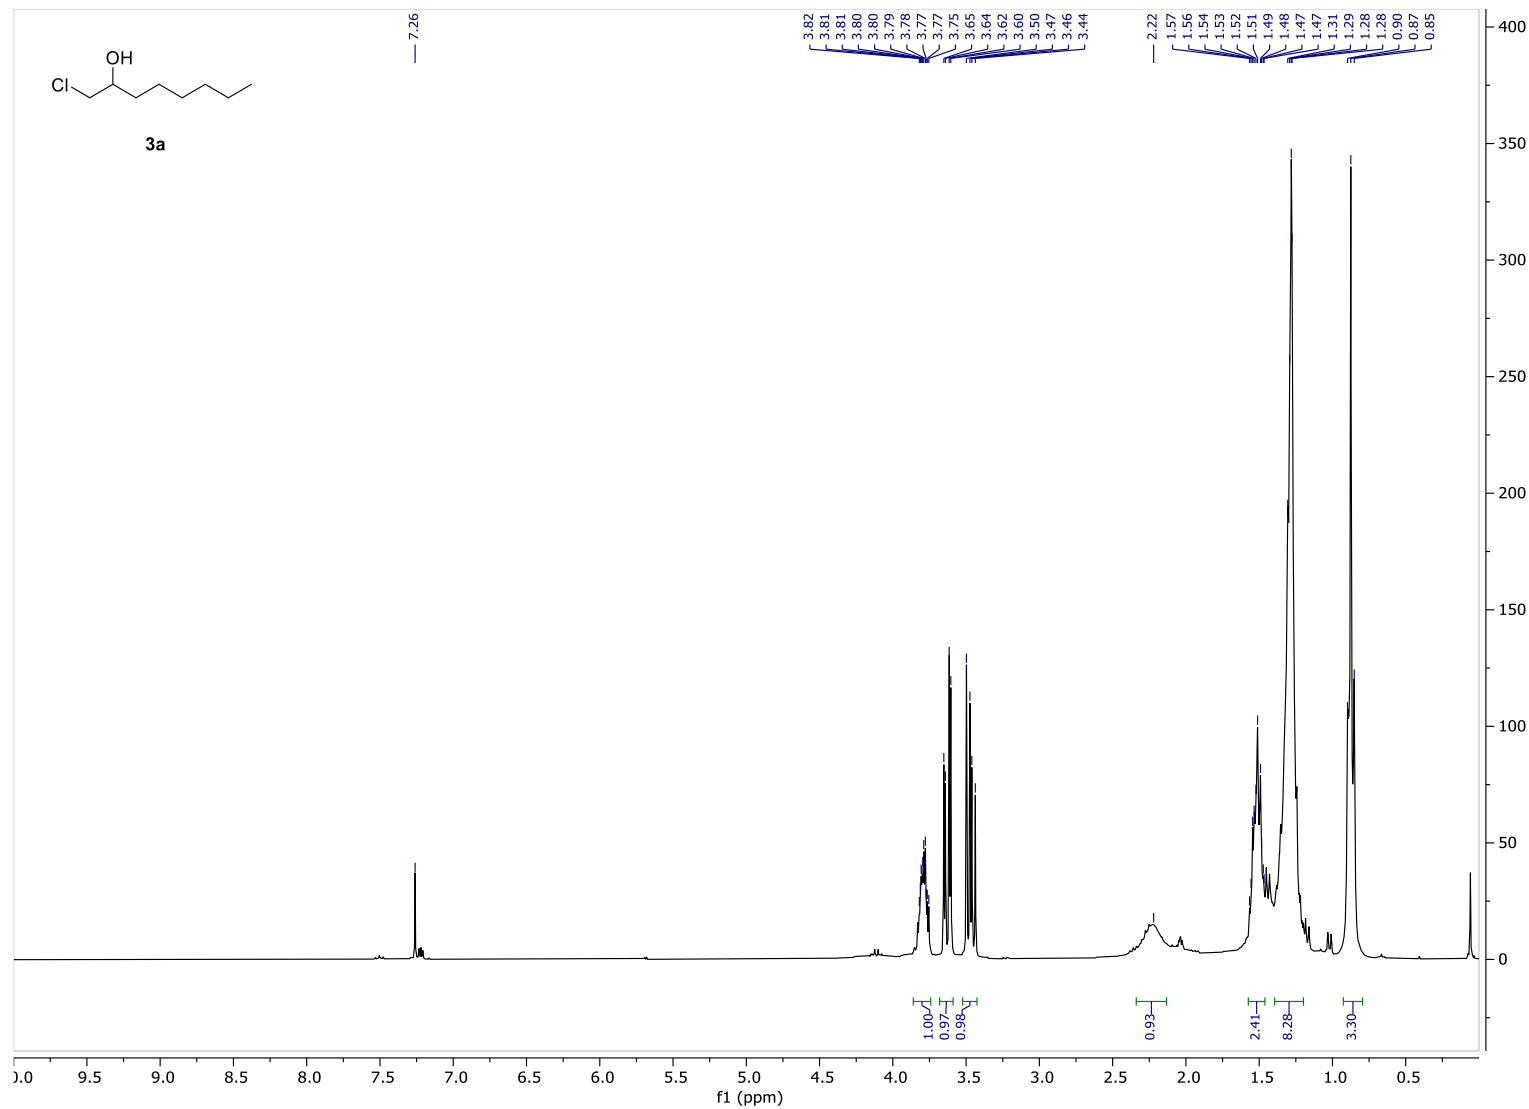

Figure S56. <sup>1</sup>H-NMR spectrum (CDCl<sub>3</sub>) of compound **3a**.

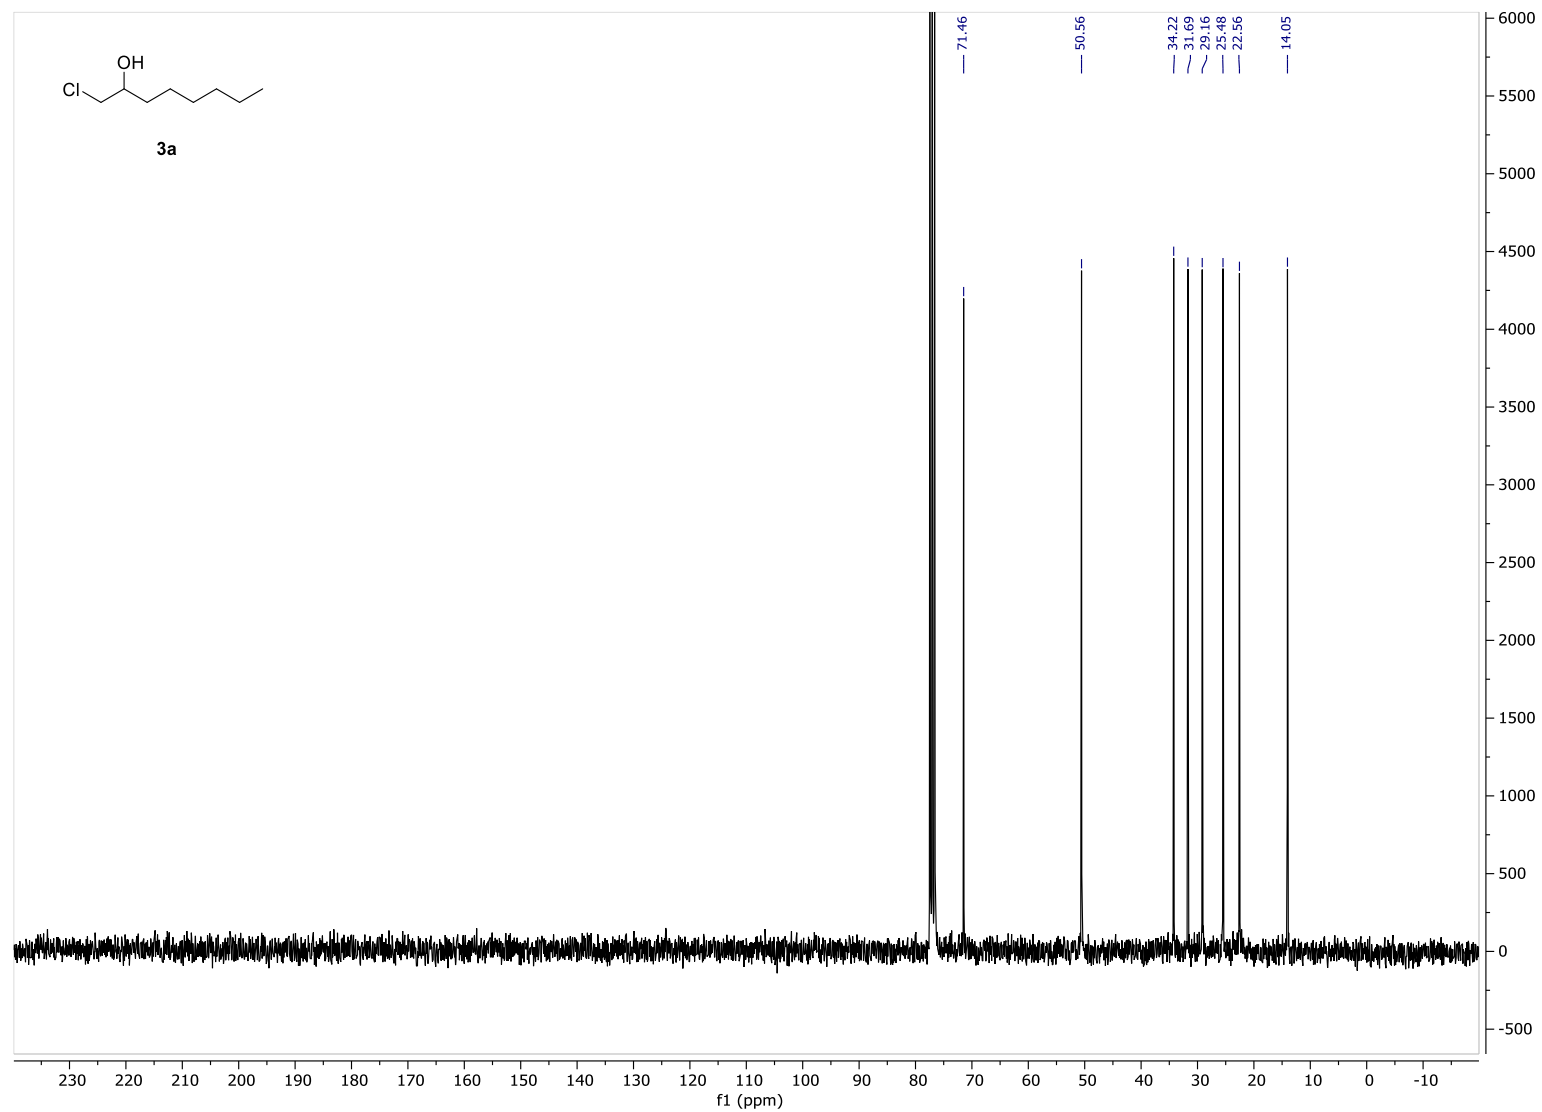

Figure S57.  $^1\text{H}$  and  $^{13}\text{C}$ -NMR spectrum ( $\text{CDCl}_3$ ) of compound **3a**.

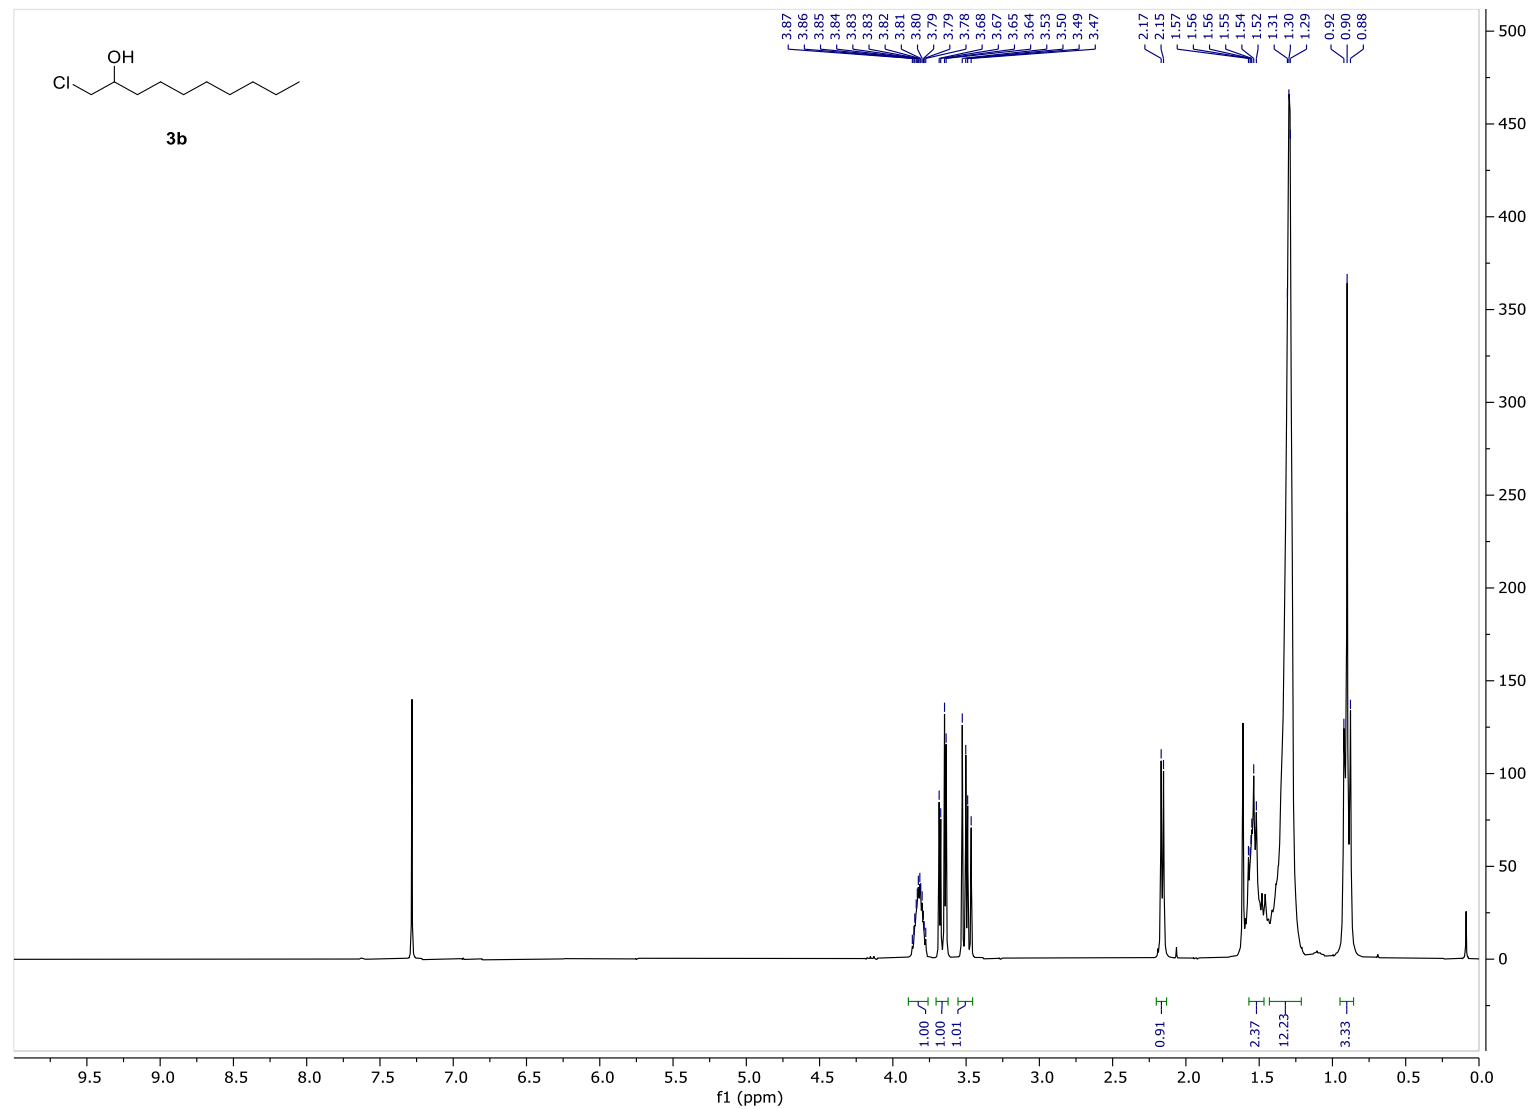

Figure S58. <sup>1</sup>H-NMR spectrum (CDCl<sub>3</sub>) of compound **3b**.

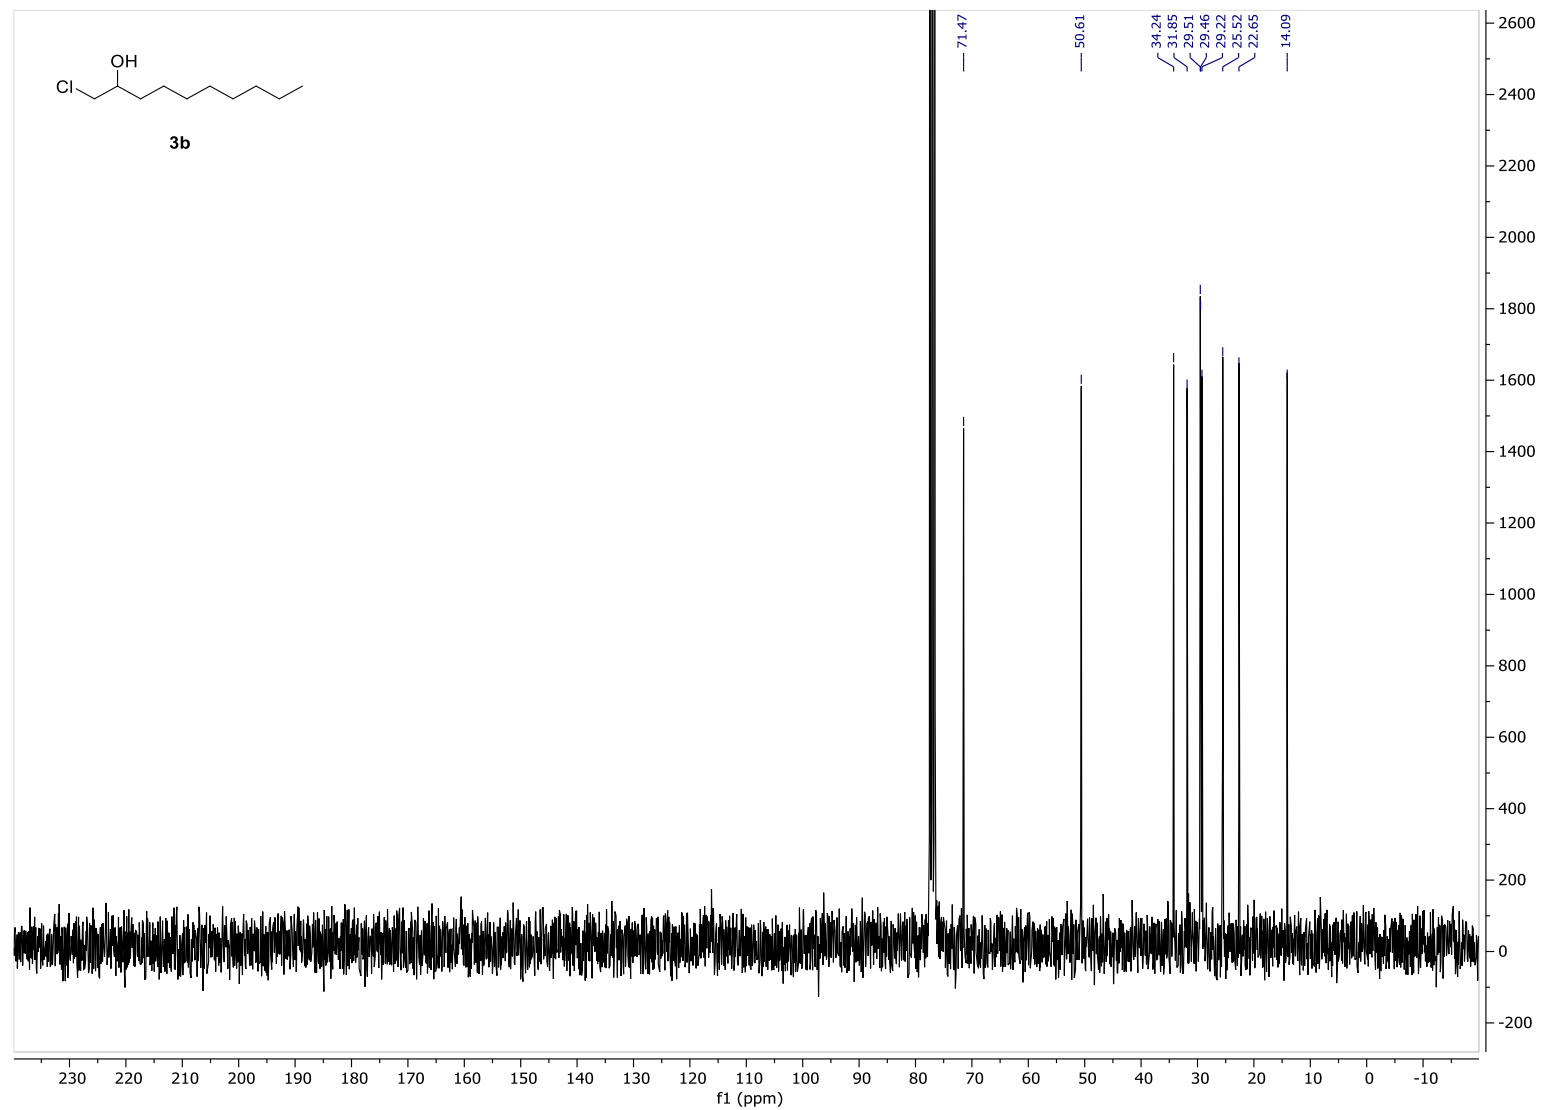

Figure S59. <sup>13</sup>C-NMR spectrum (CDCl<sub>3</sub>) of compound **3b**.

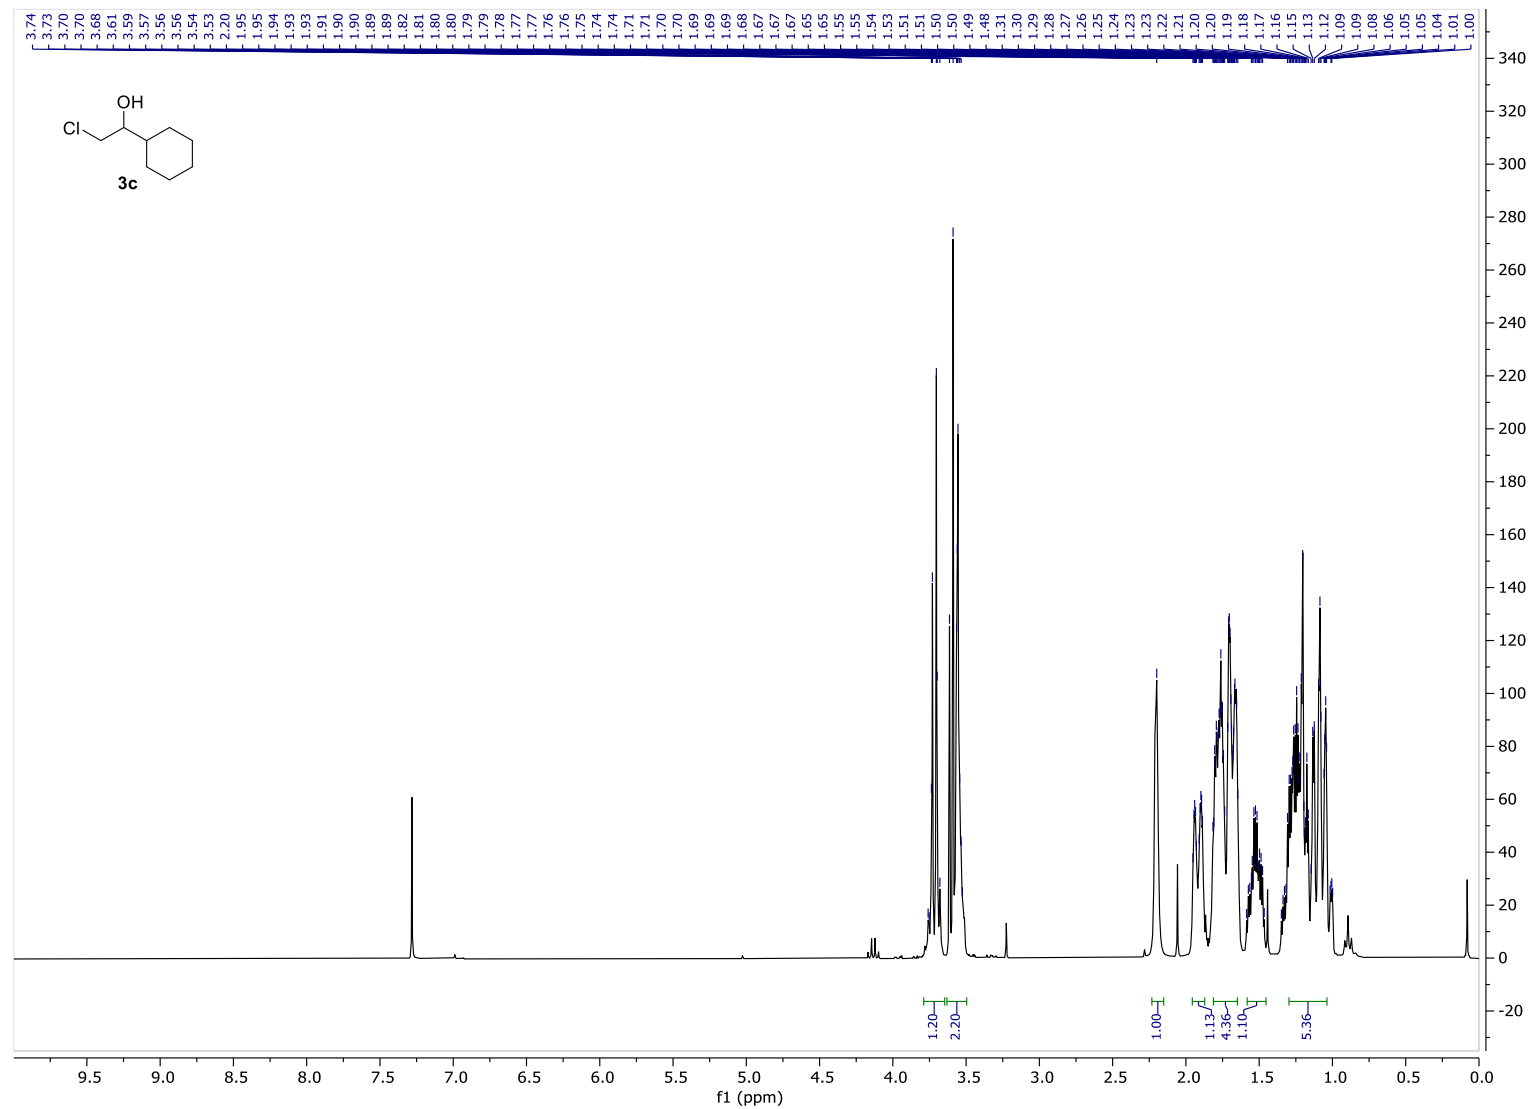

Figure S60. <sup>1</sup>H-NMR spectrum (CDCl<sub>3</sub>) of compound **3c**.

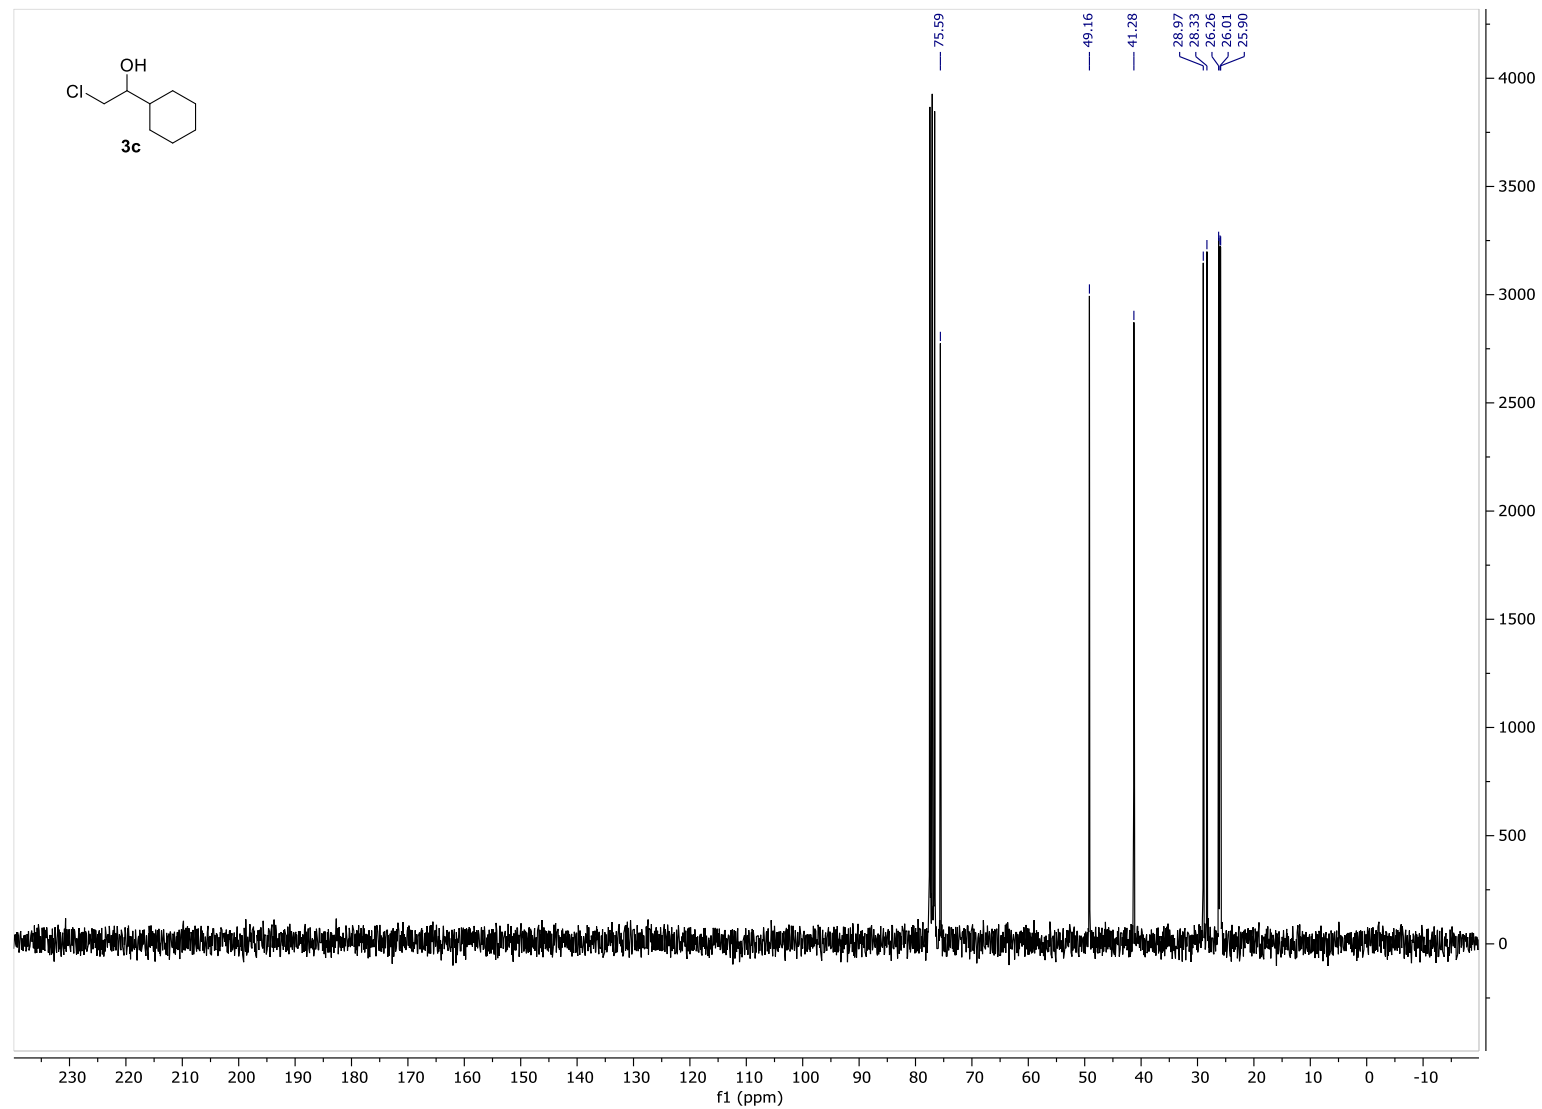

Figure S61.  $^{13}\text{C-NMR}$  spectrum (CDCl<sub>3</sub>) of compound **3c**.

S102

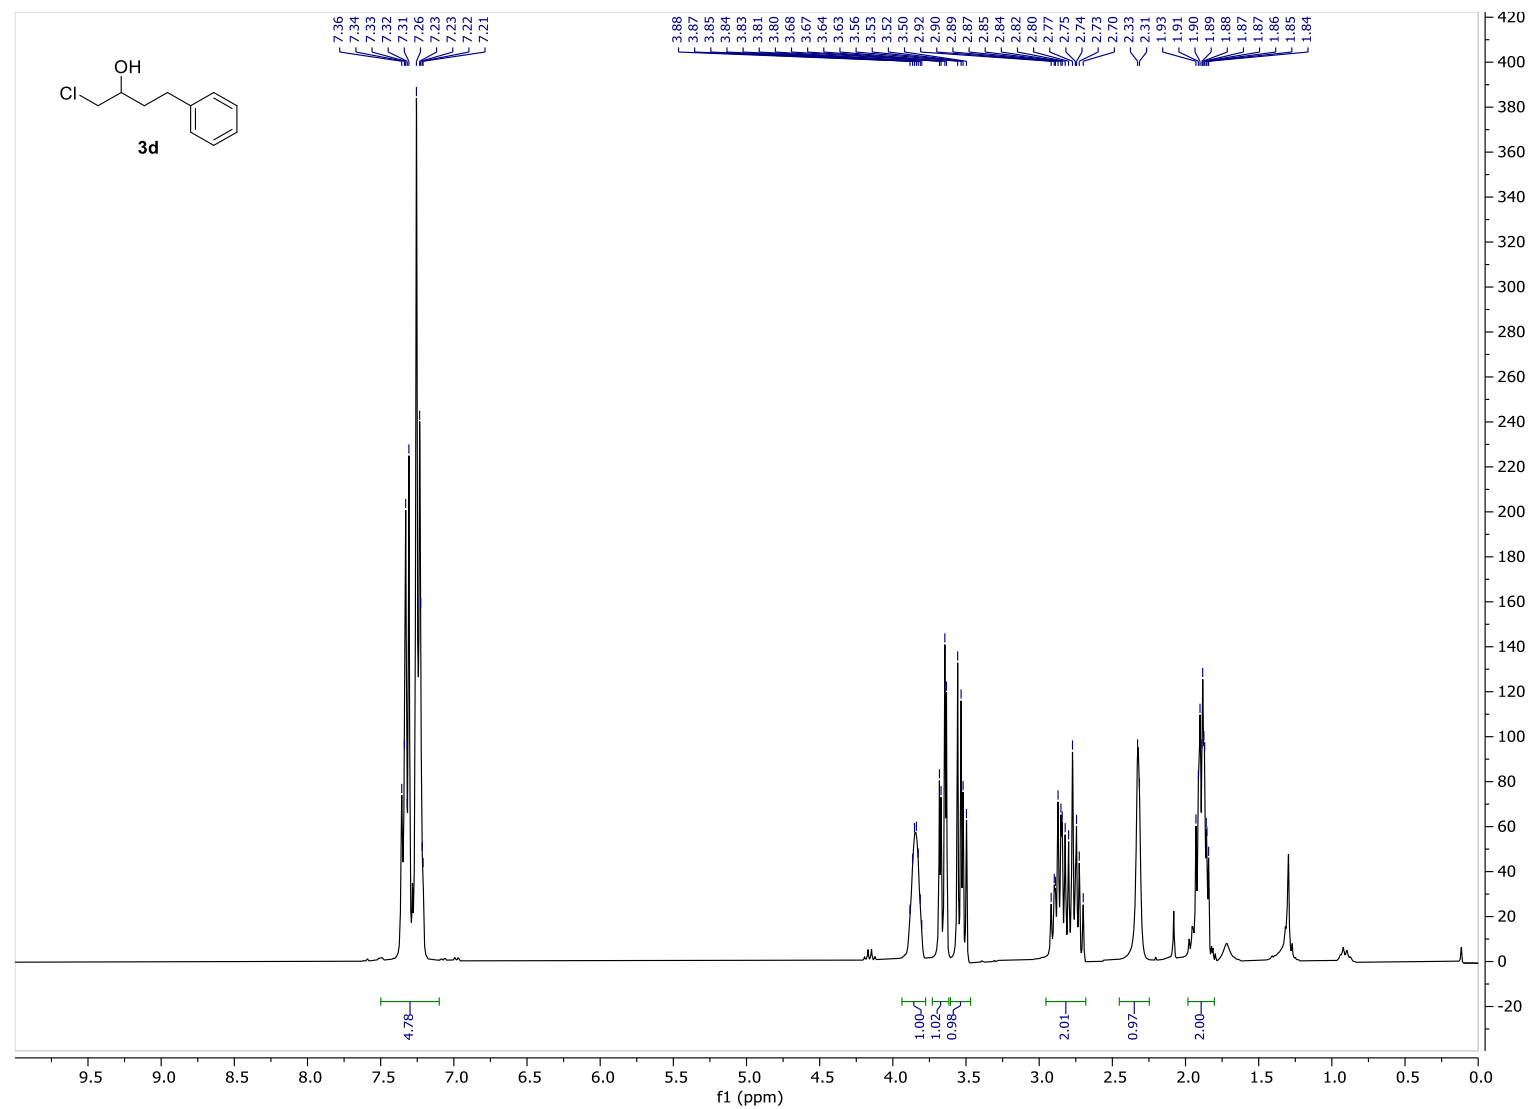

Figure S62.  $^1\text{H-NMR}$  spectrum ( $\text{CDCl}_3$ ) of compound **3d**.

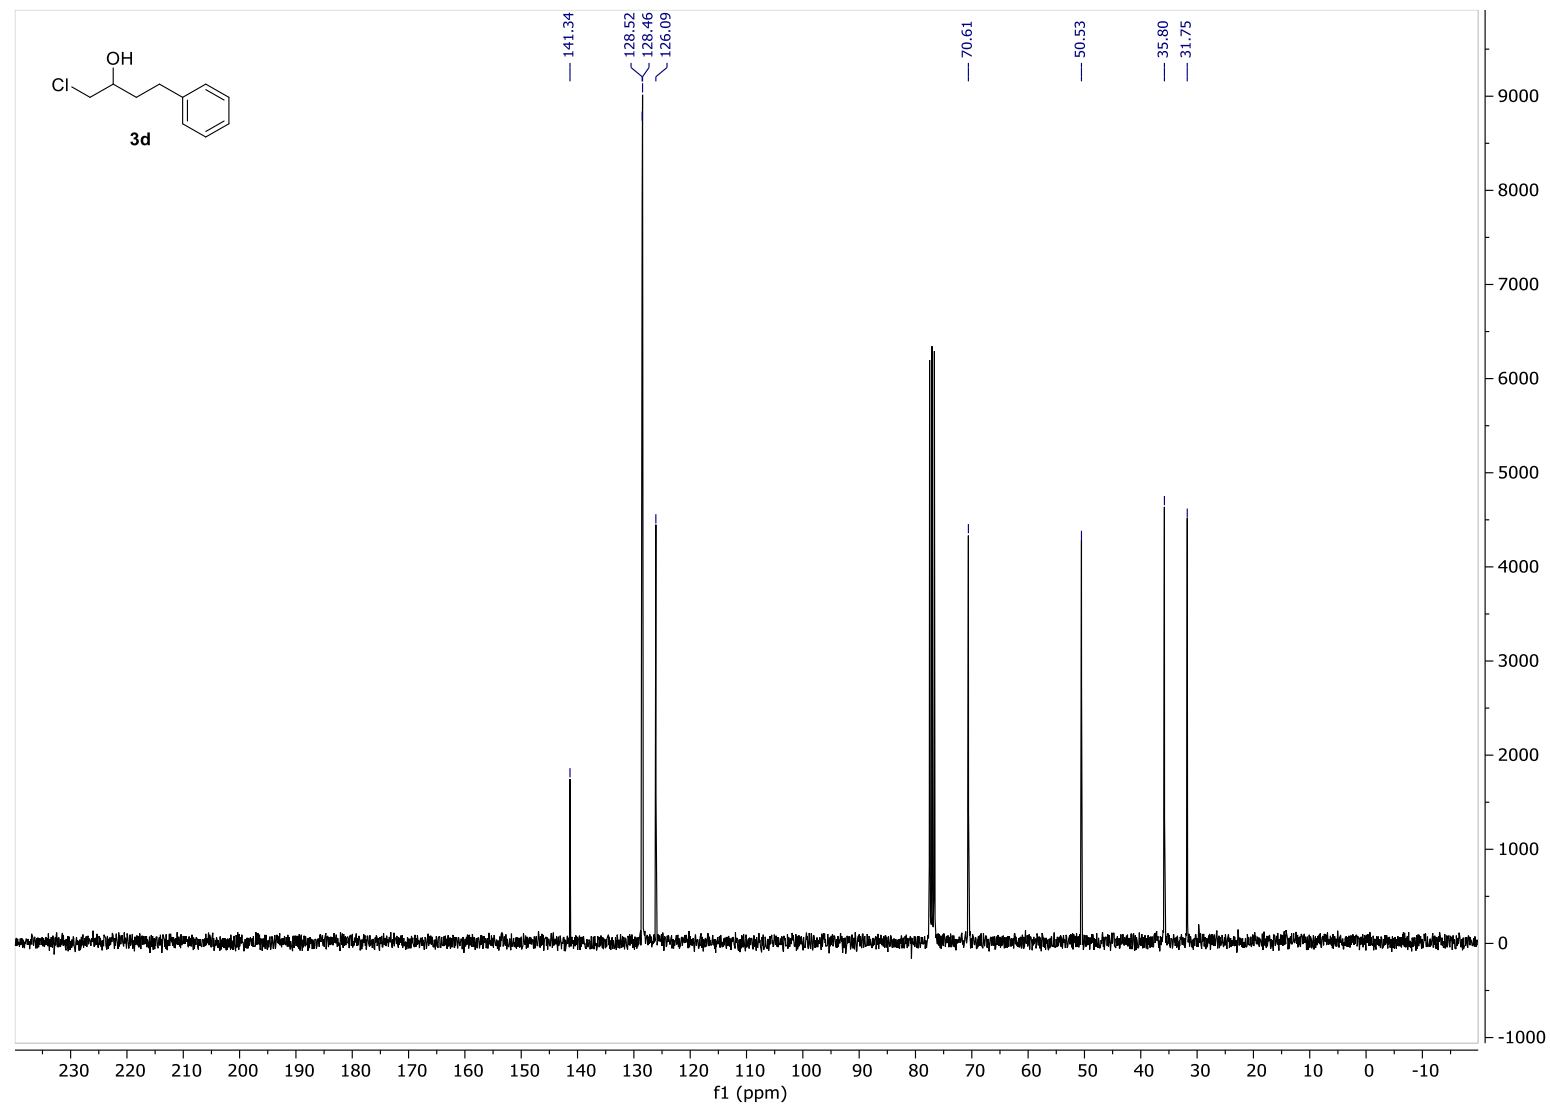

Figure S63.  $^{13}\text{C}$ -NMR spectrum (CDCl<sub>3</sub>) of compound **3d**.



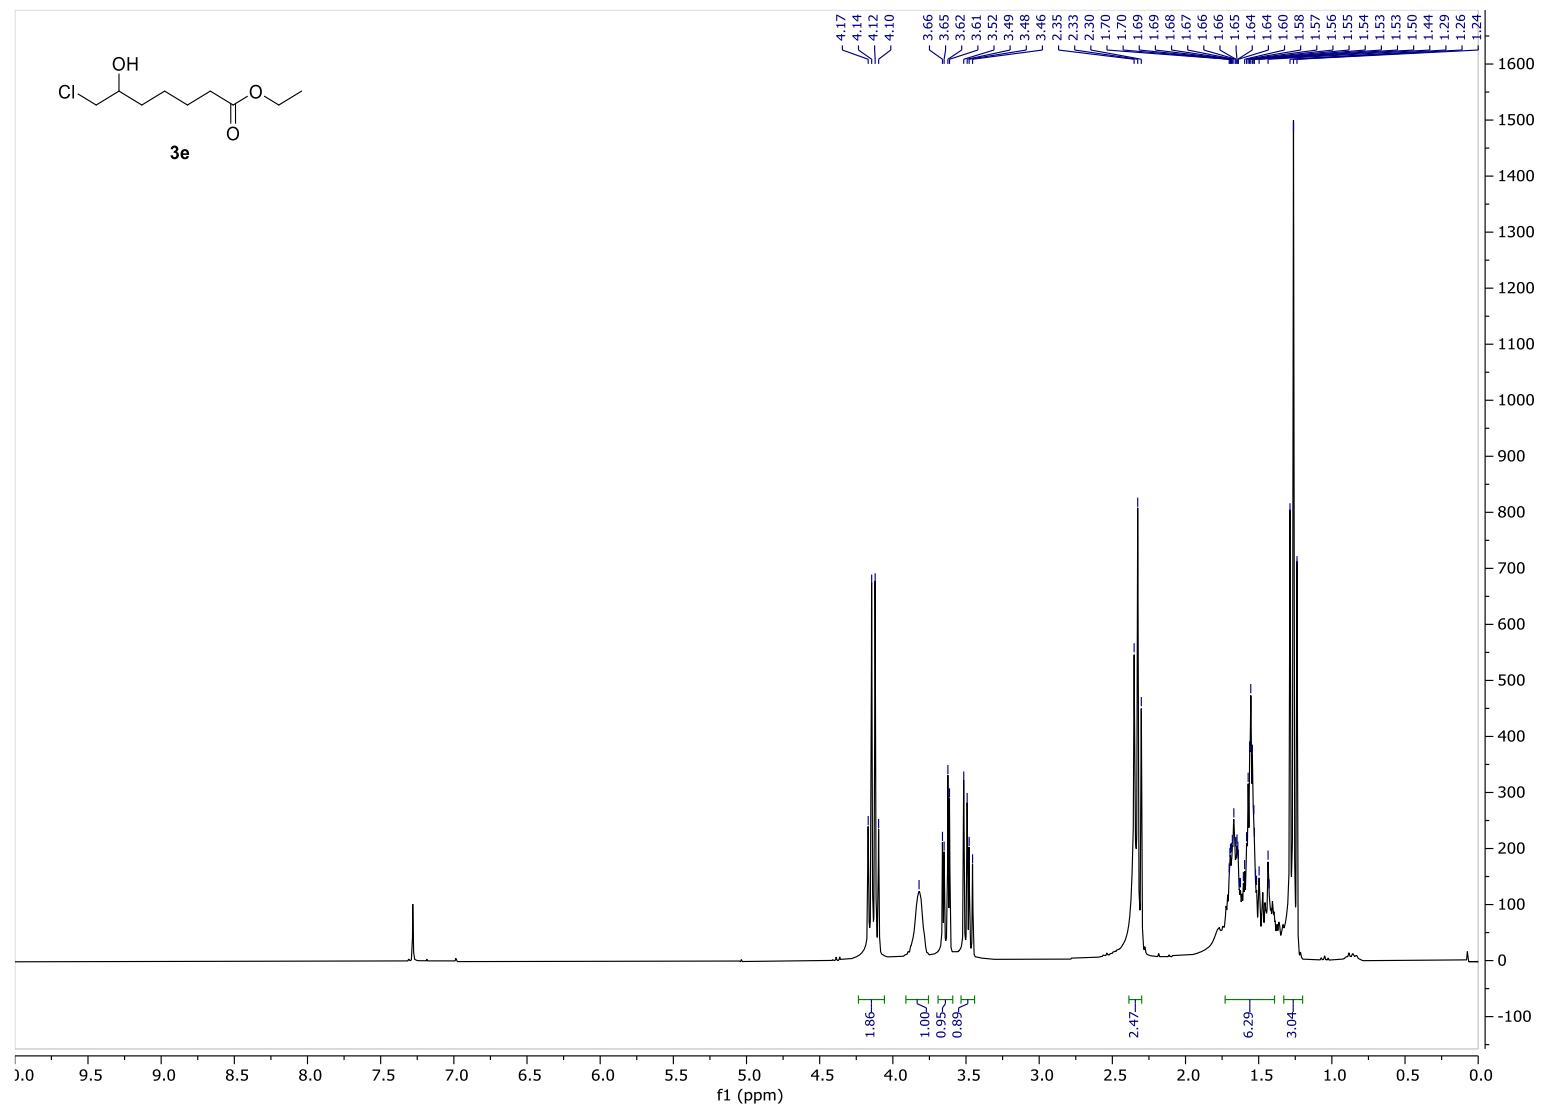

**Figure S64.** <sup>1</sup>H-NMR spectrum (CDCl<sub>3</sub>) of compound **3e**.

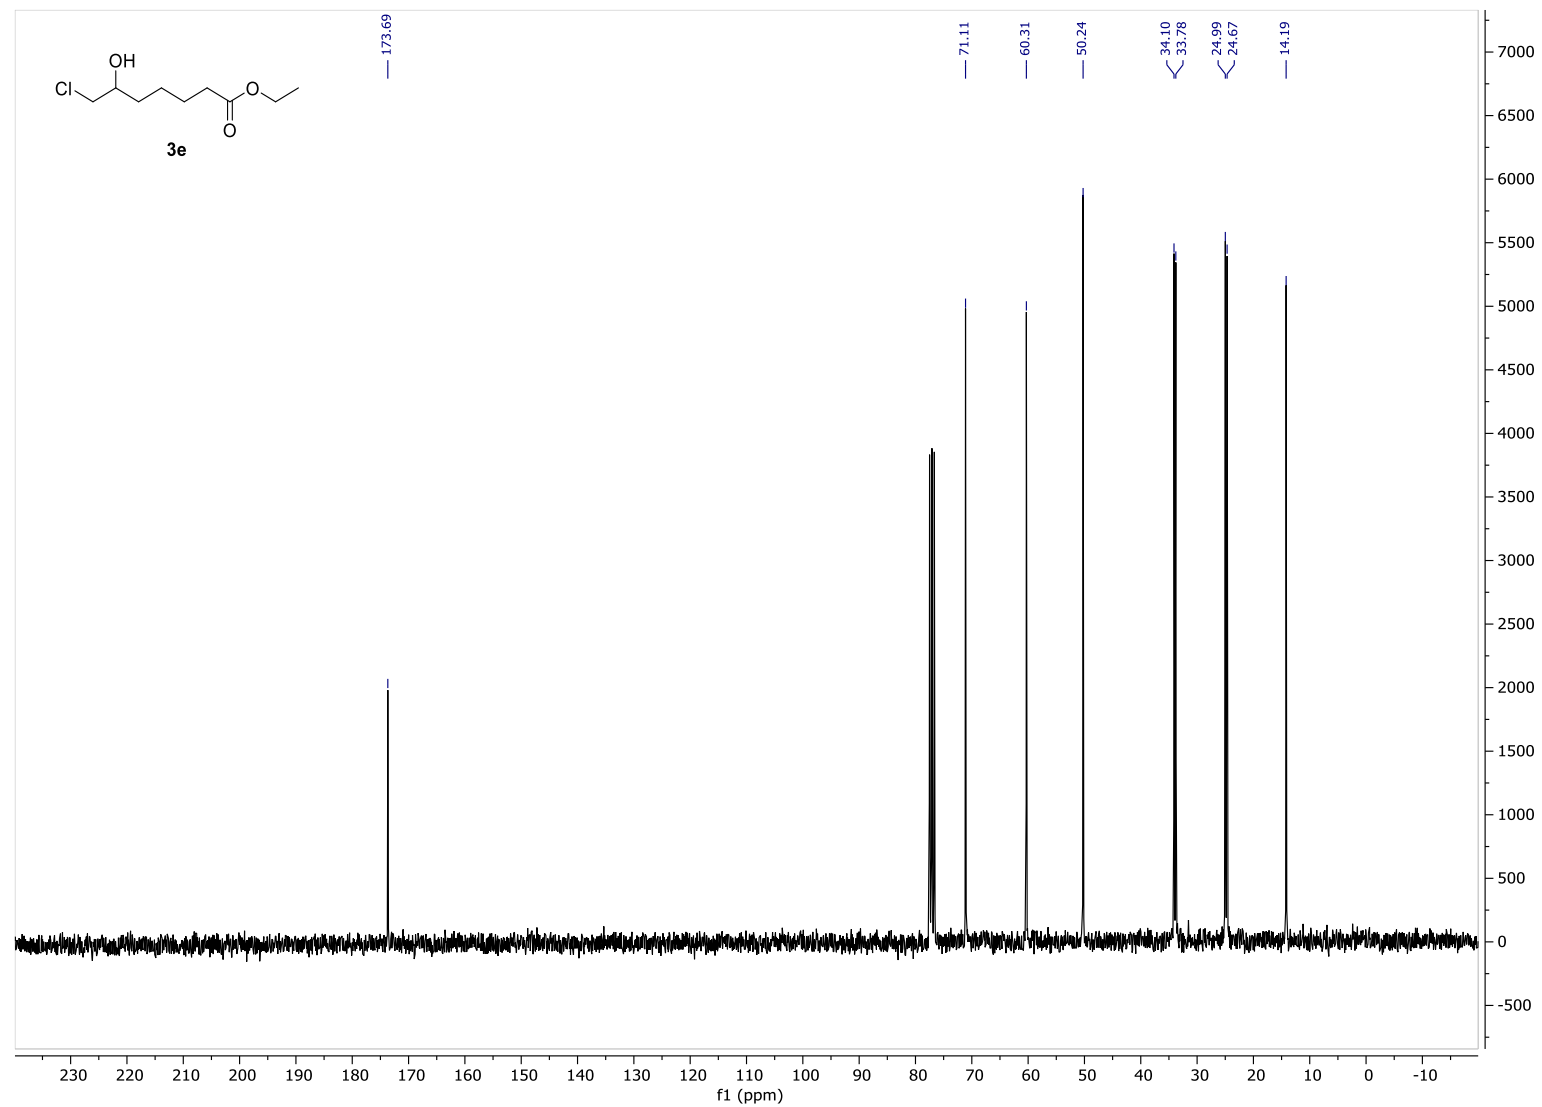

Figure S65. <sup>13</sup>C-NMR spectrum (CDCl<sub>3</sub>) of compound **3e**.

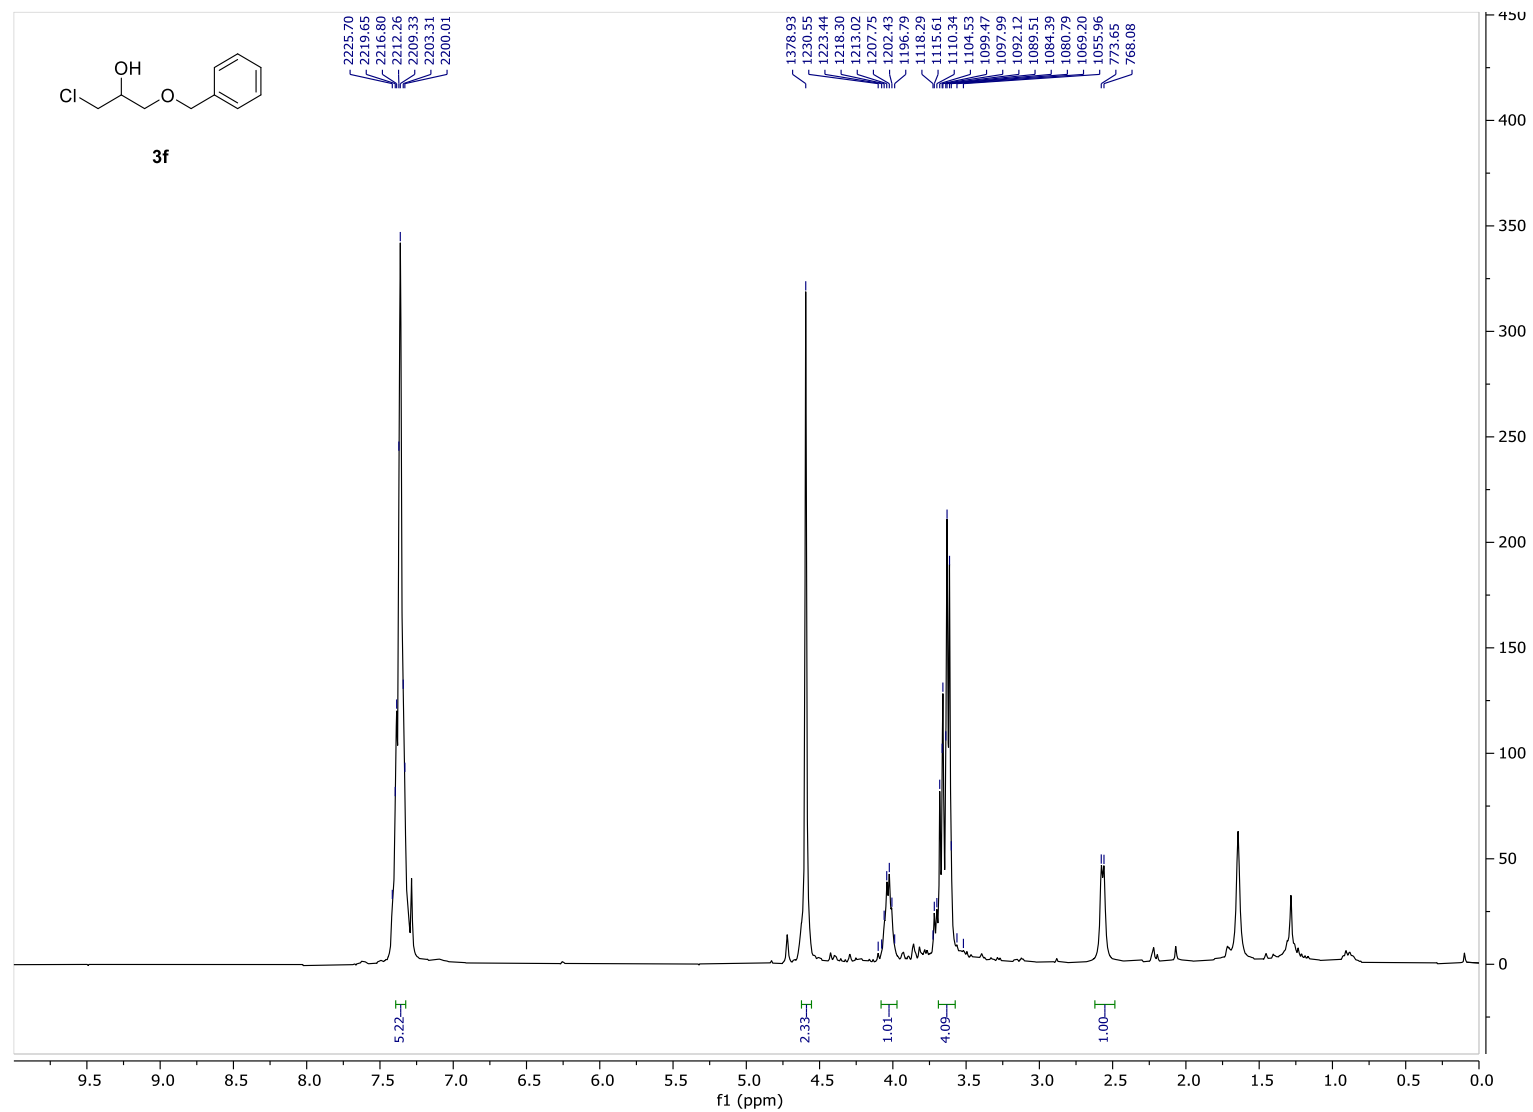

Figure S66.  $^1\text{H-NMR}$  spectrum ( $\text{CDCl}_3$ ) of compound **3f**.

S107

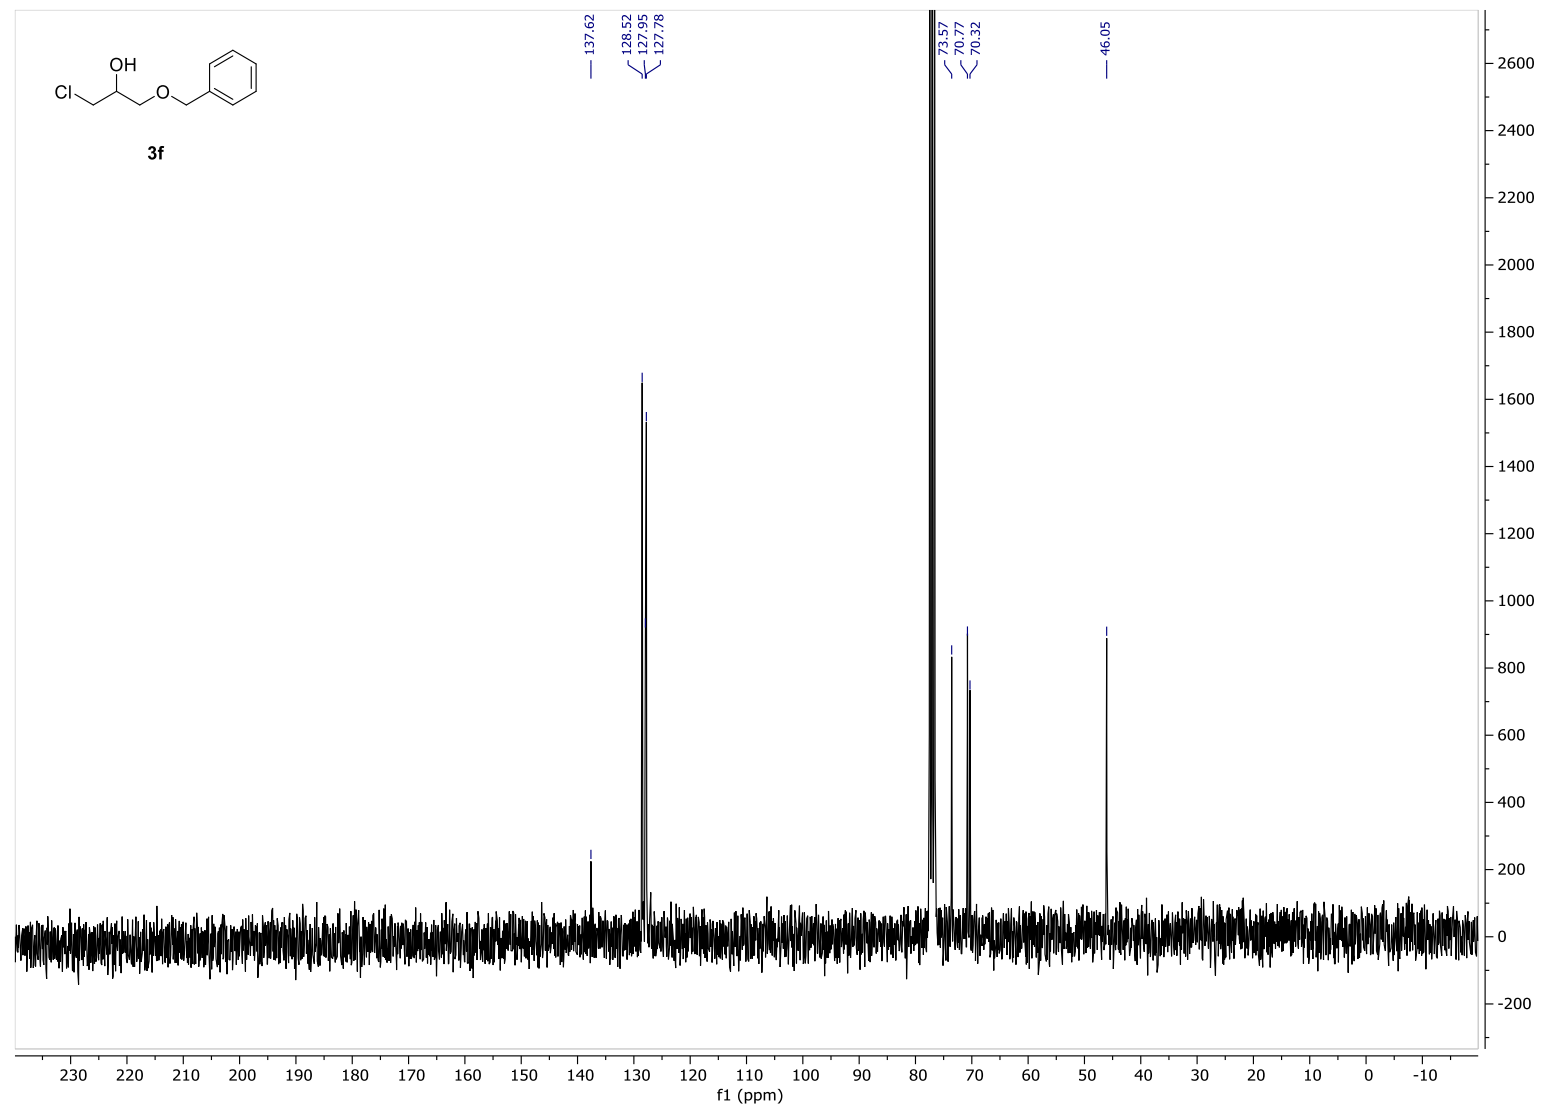

**Figure S67.**  $^{13}\text{C}$ -NMR spectrum ( $\text{CDCl}_3$ ) of compound **3f**.

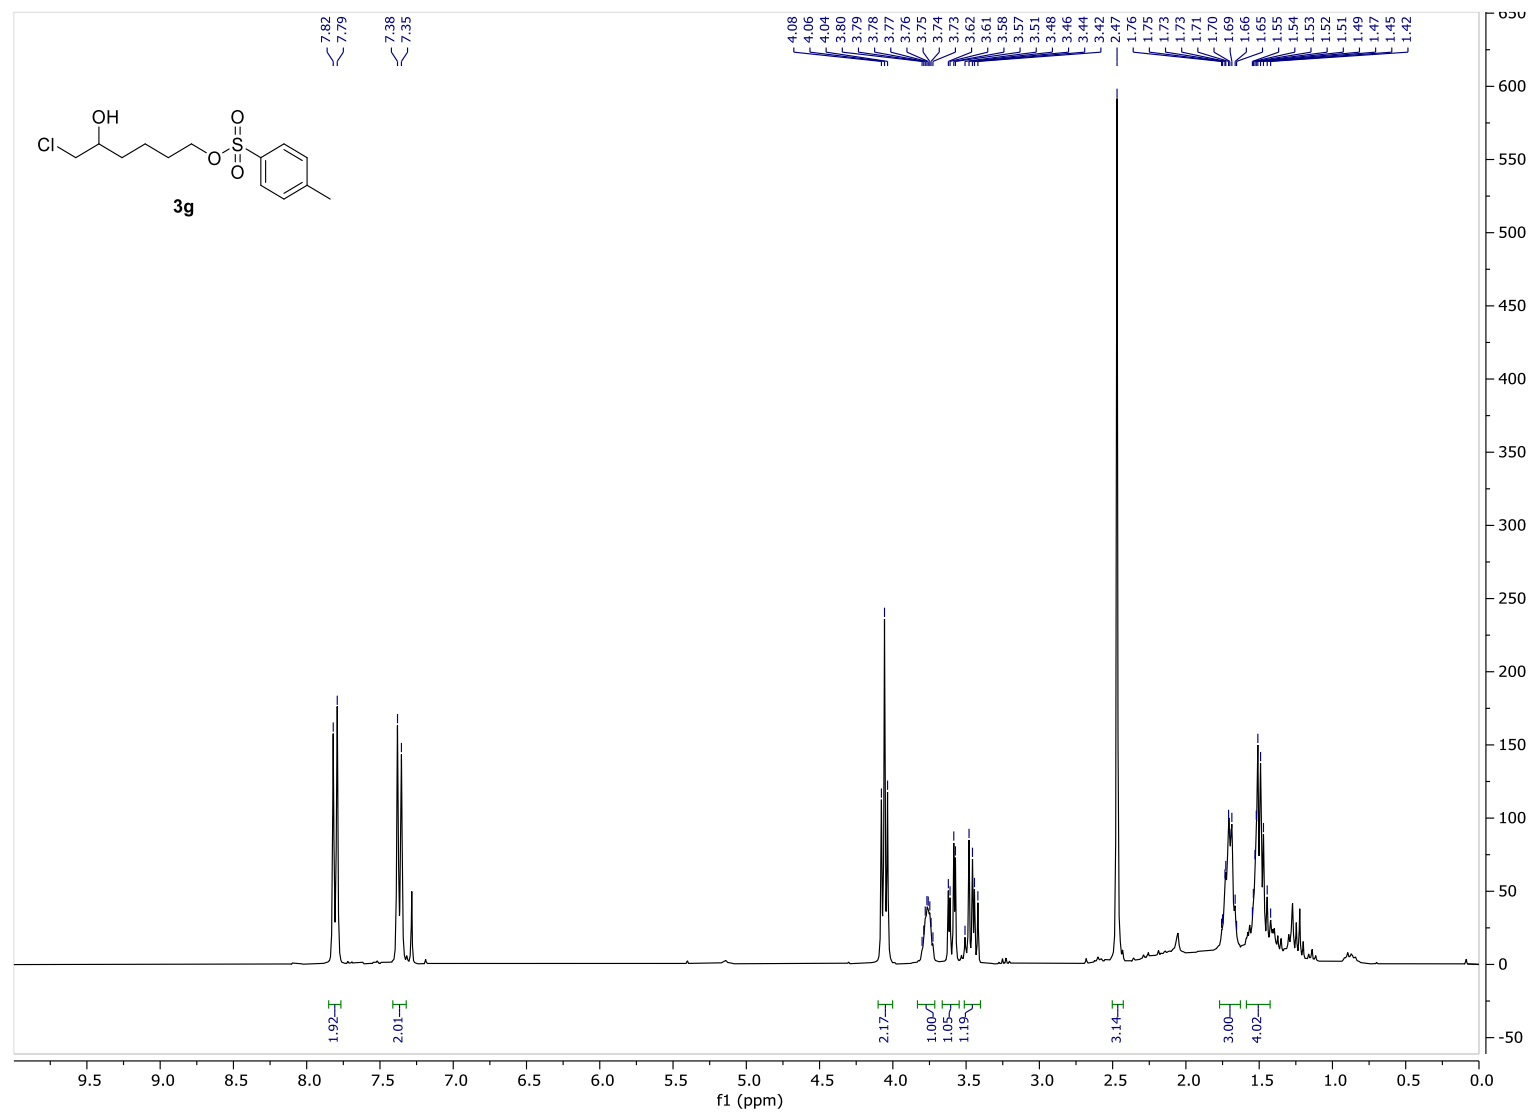

Figure S68. <sup>1</sup>H-NMR spectrum (CDCl<sub>3</sub>) of compound **3g**.

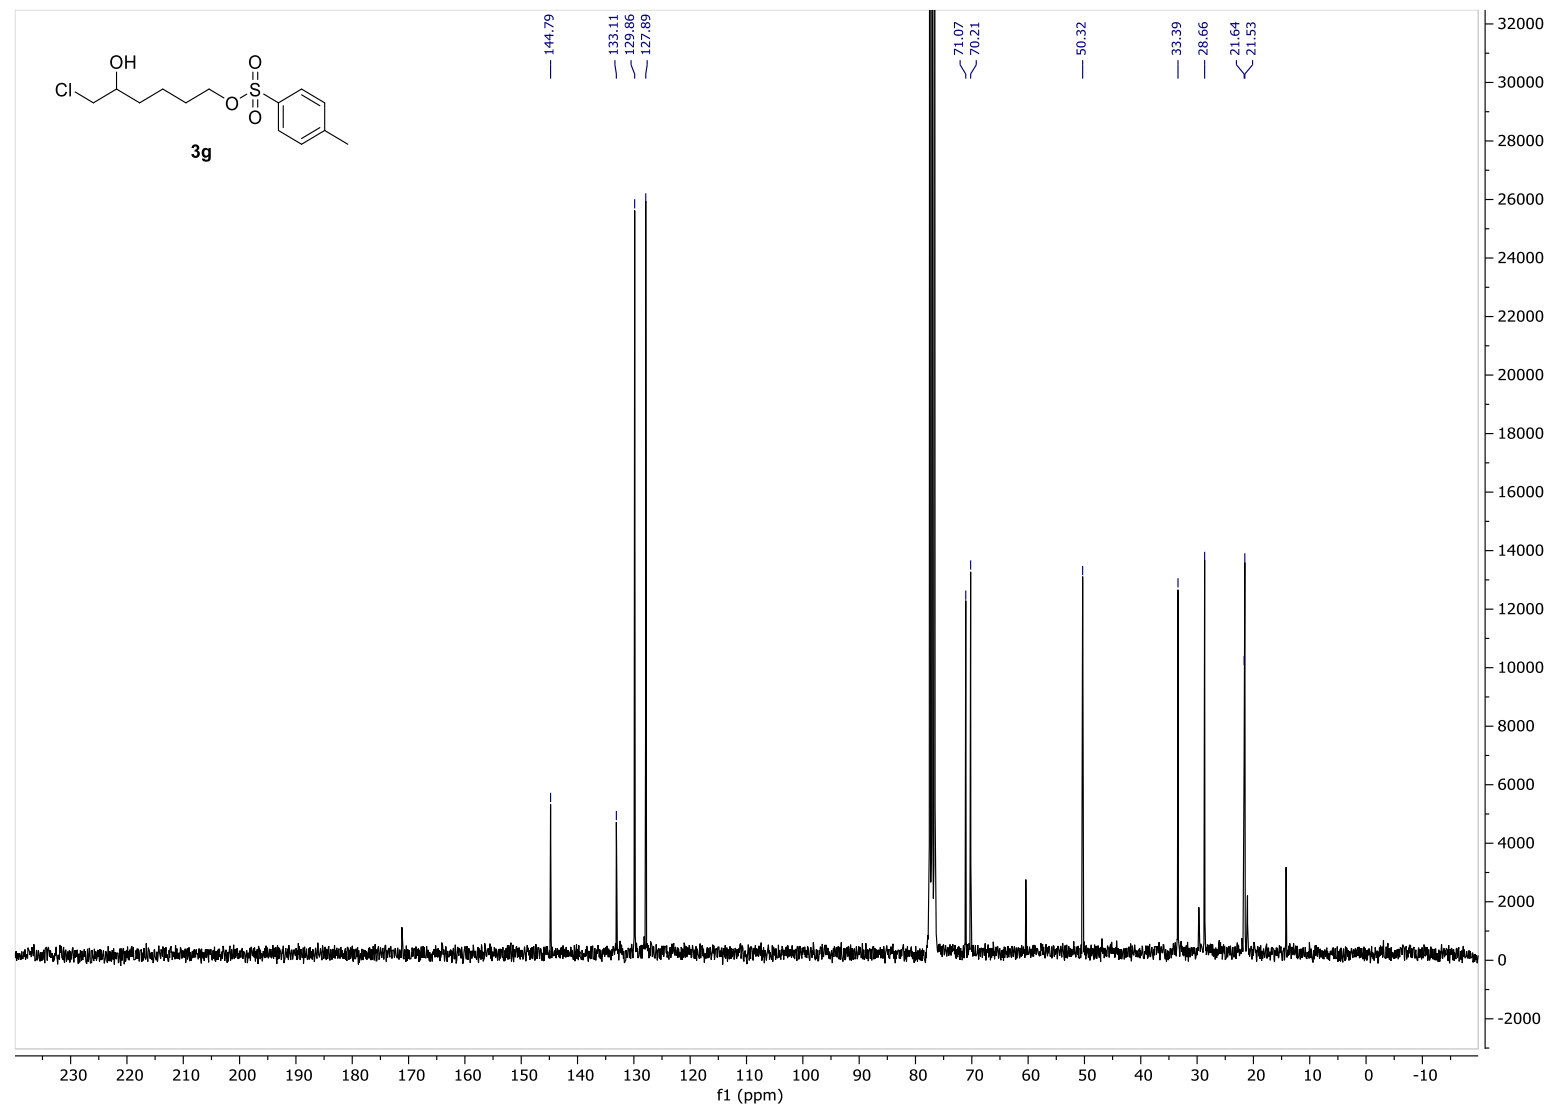

Figure S69.  $^{13}\text{C-NMR}$  spectrum (CDCl<sub>3</sub>) of compound **3g**.

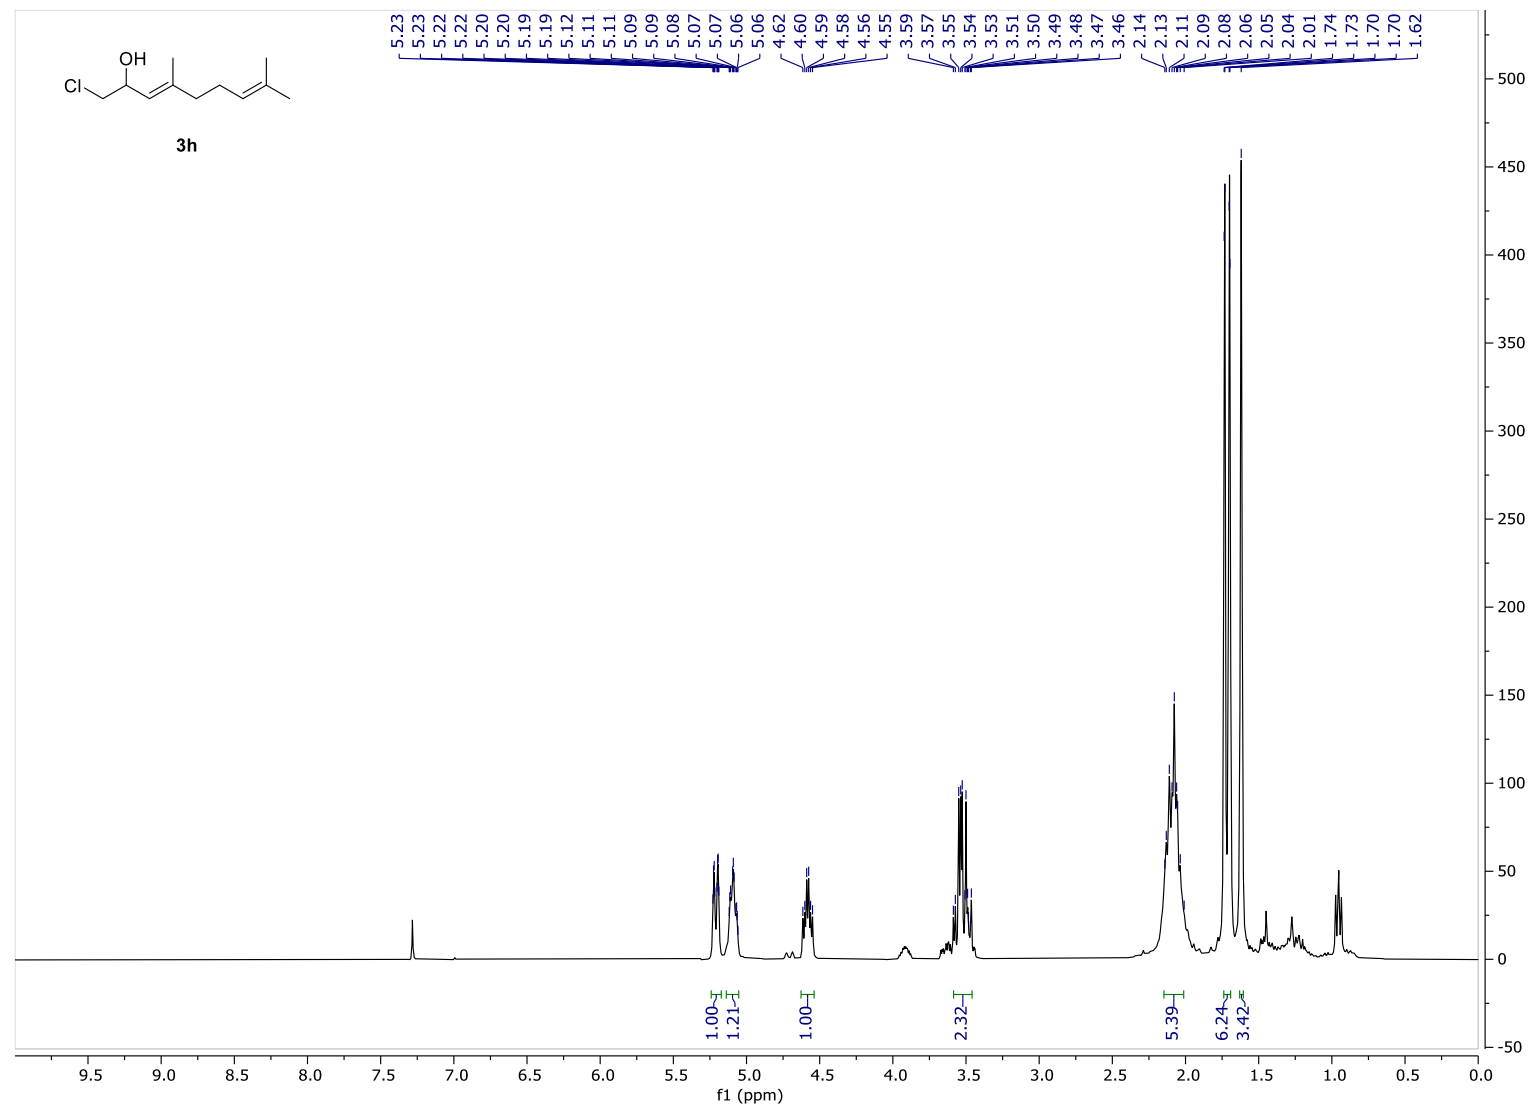

**Figure S70.** <sup>1</sup>H-NMR spectrum (CDCl<sub>3</sub>) of compound **3h**.

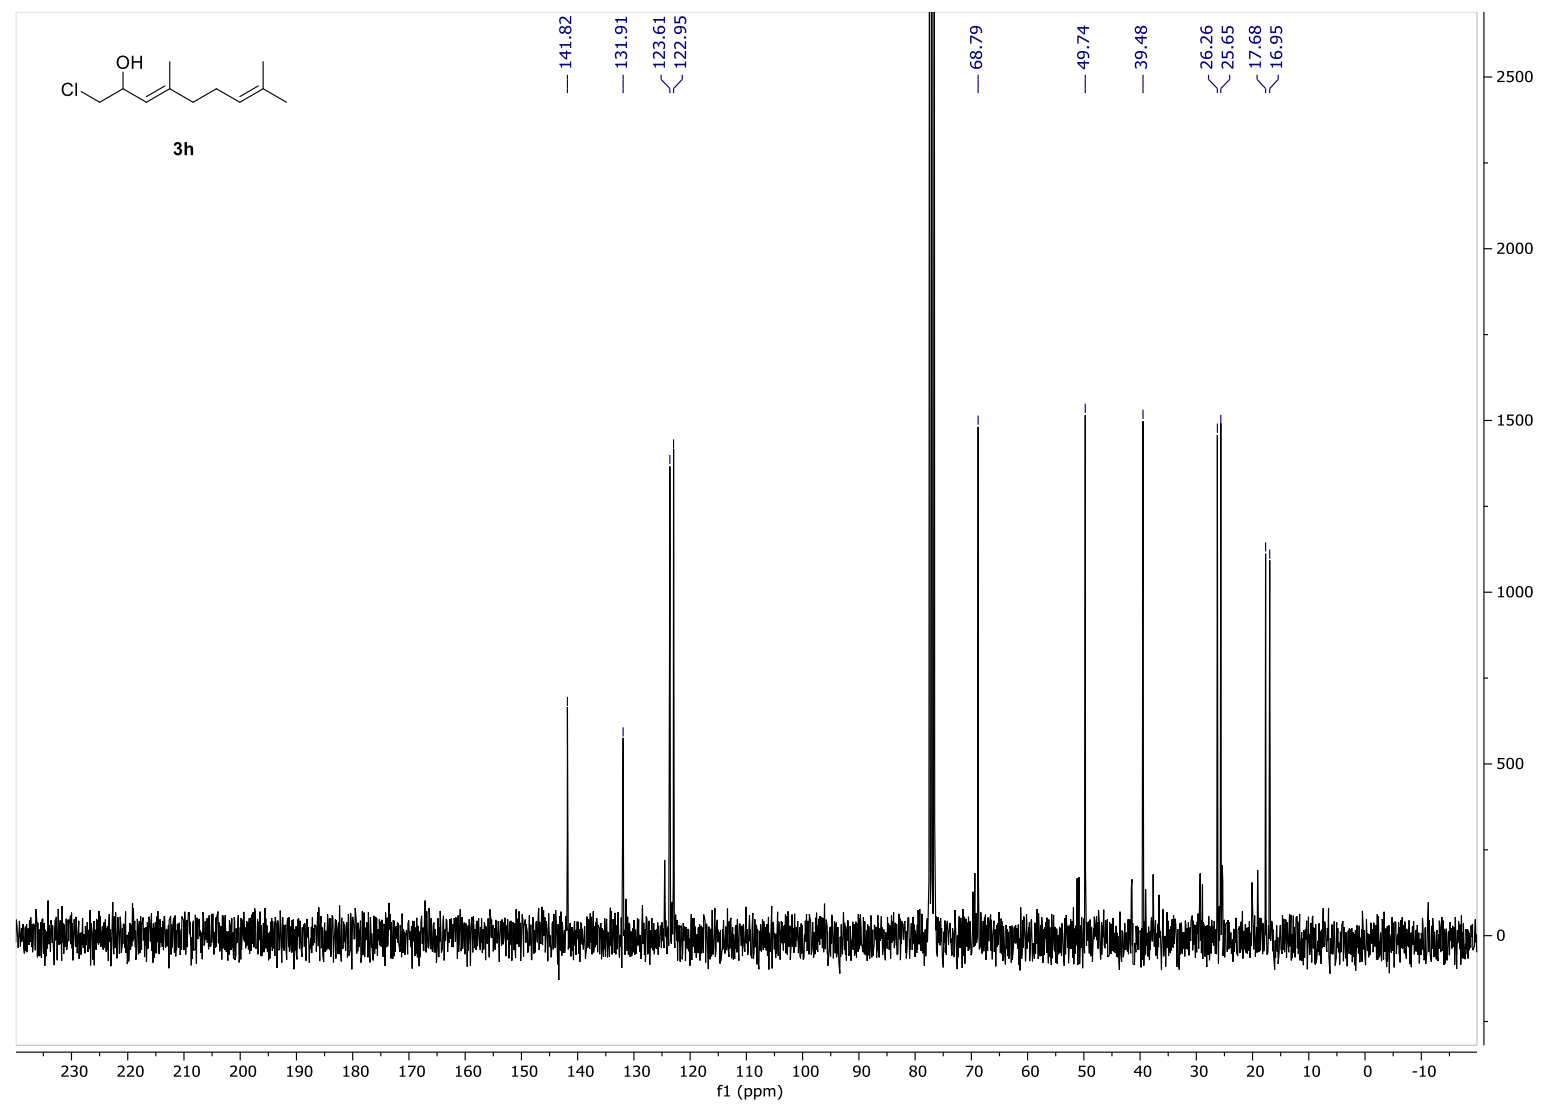

**Figure S71.** <sup>13</sup>C-NMR spectrum (CDCl<sub>3</sub>) of compound **3h**.



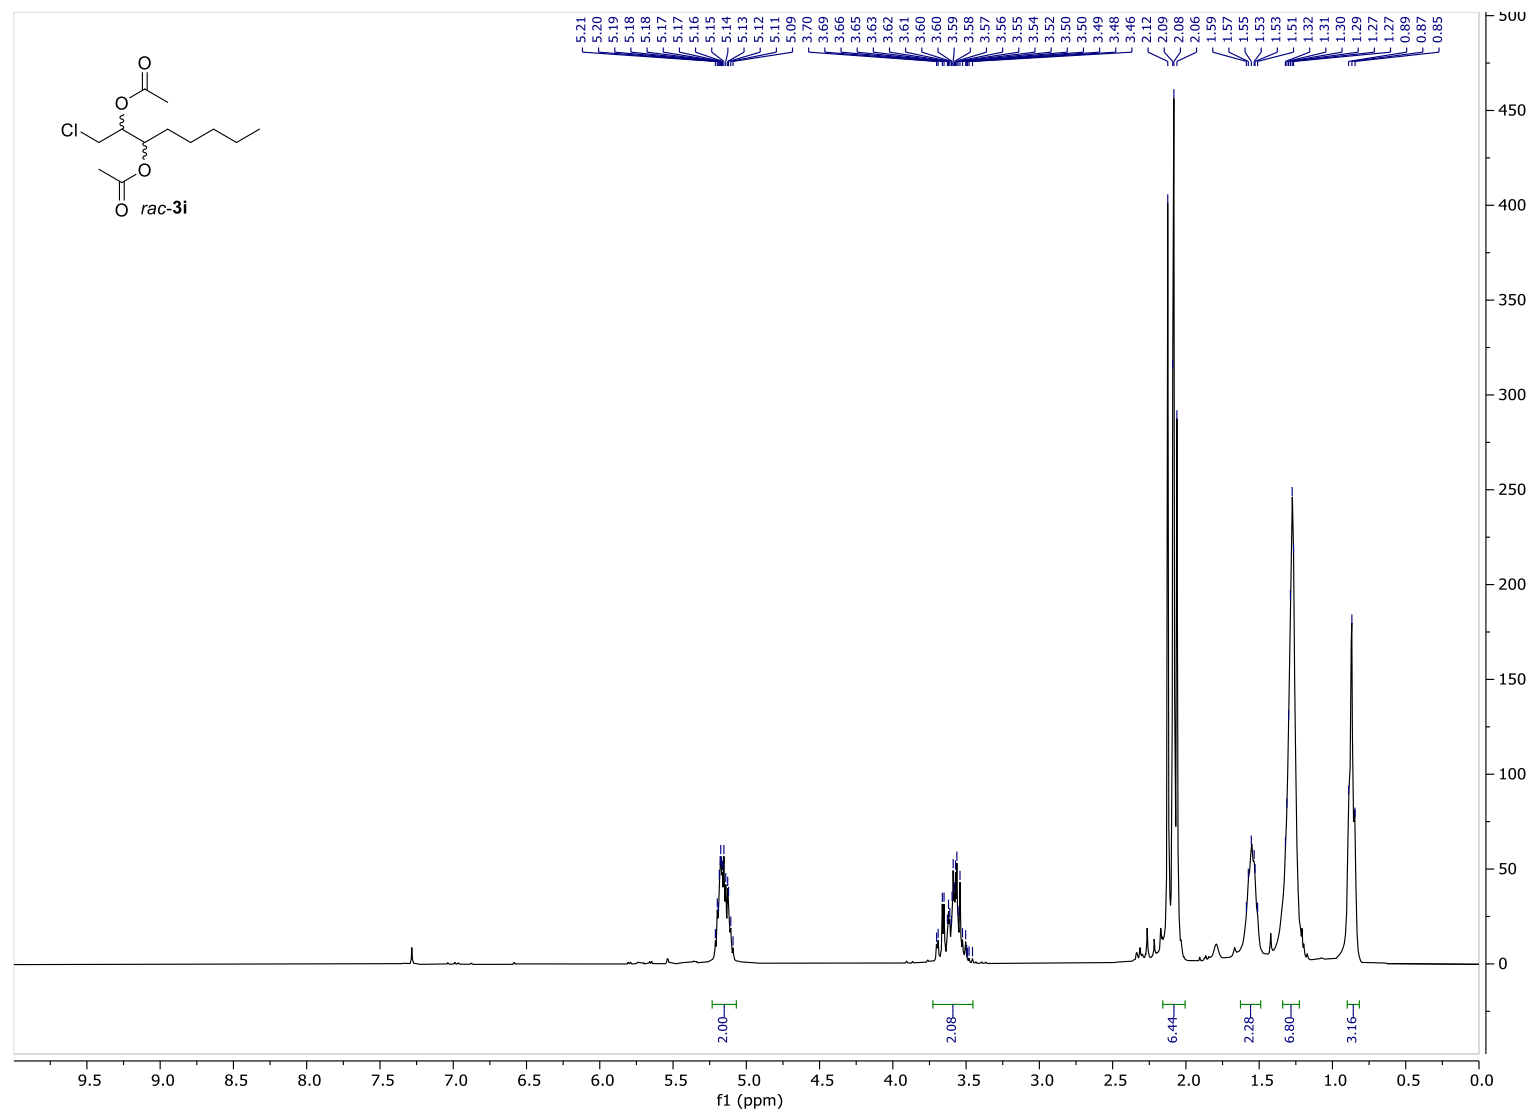

Figure S72.  $^1\text{H-NMR}$  spectrum ( $\text{CDCl}_3$ ) of compound *rac-3i*.

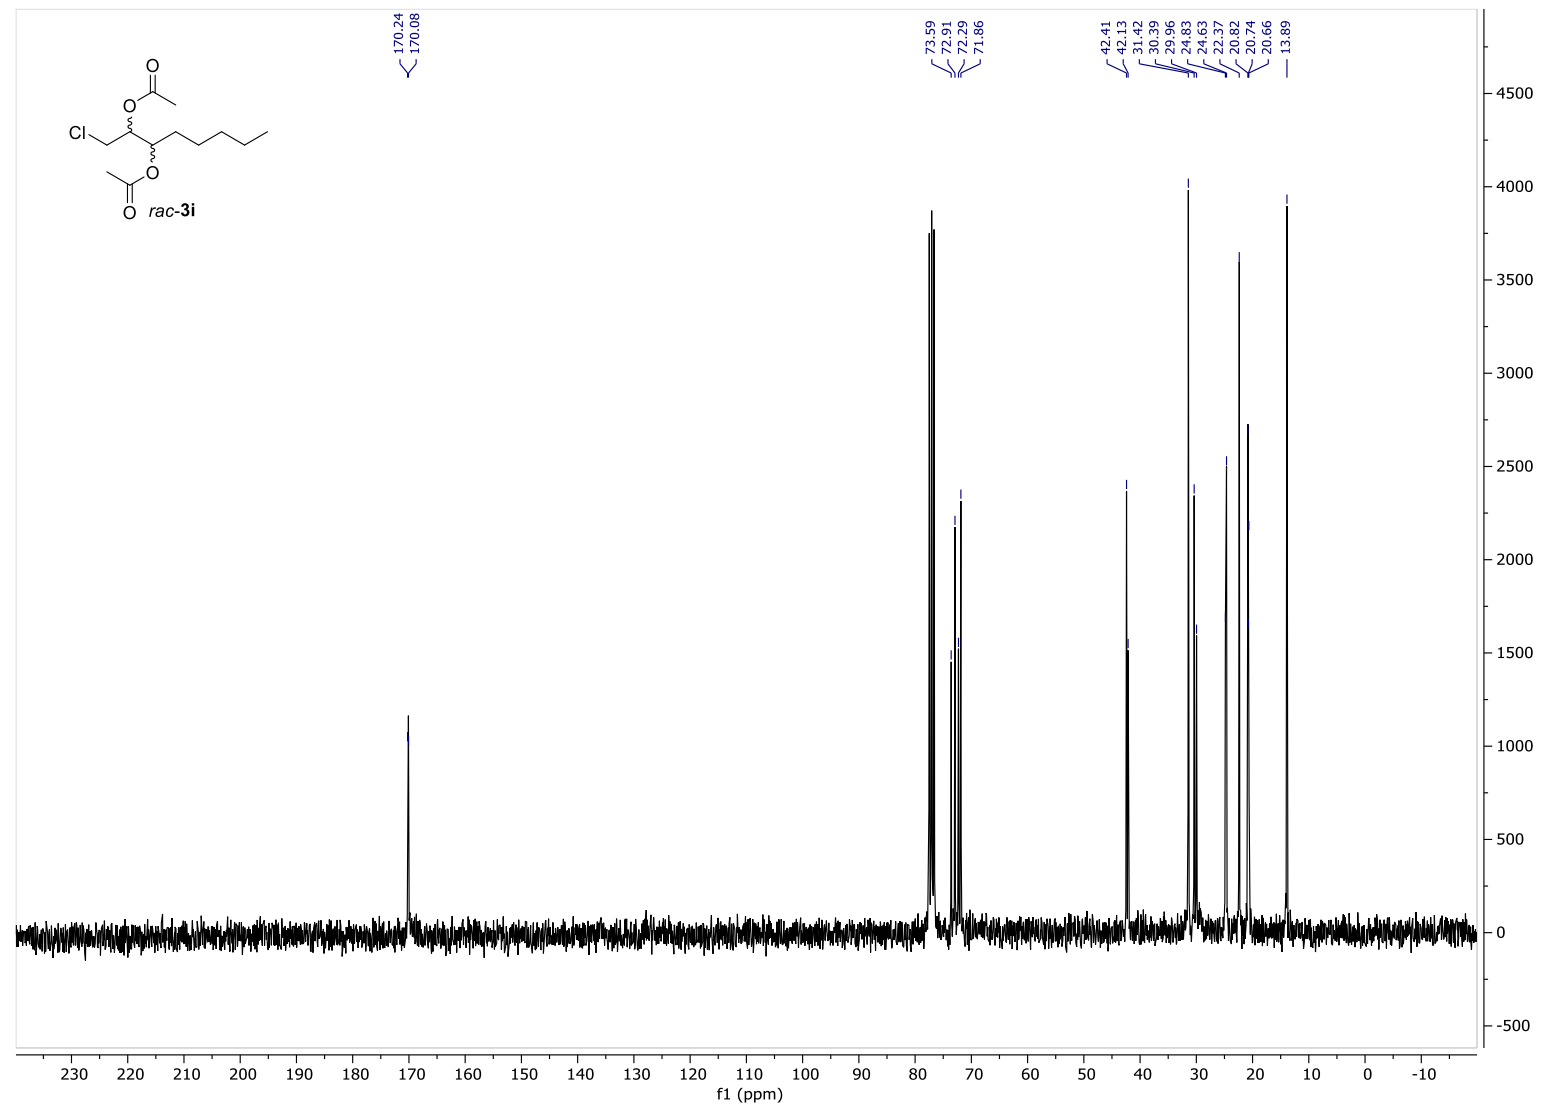

Figure S73.  $^{13}\text{C-NMR}$  spectrum (CDCl<sub>3</sub>) of compound *rac-3i*.

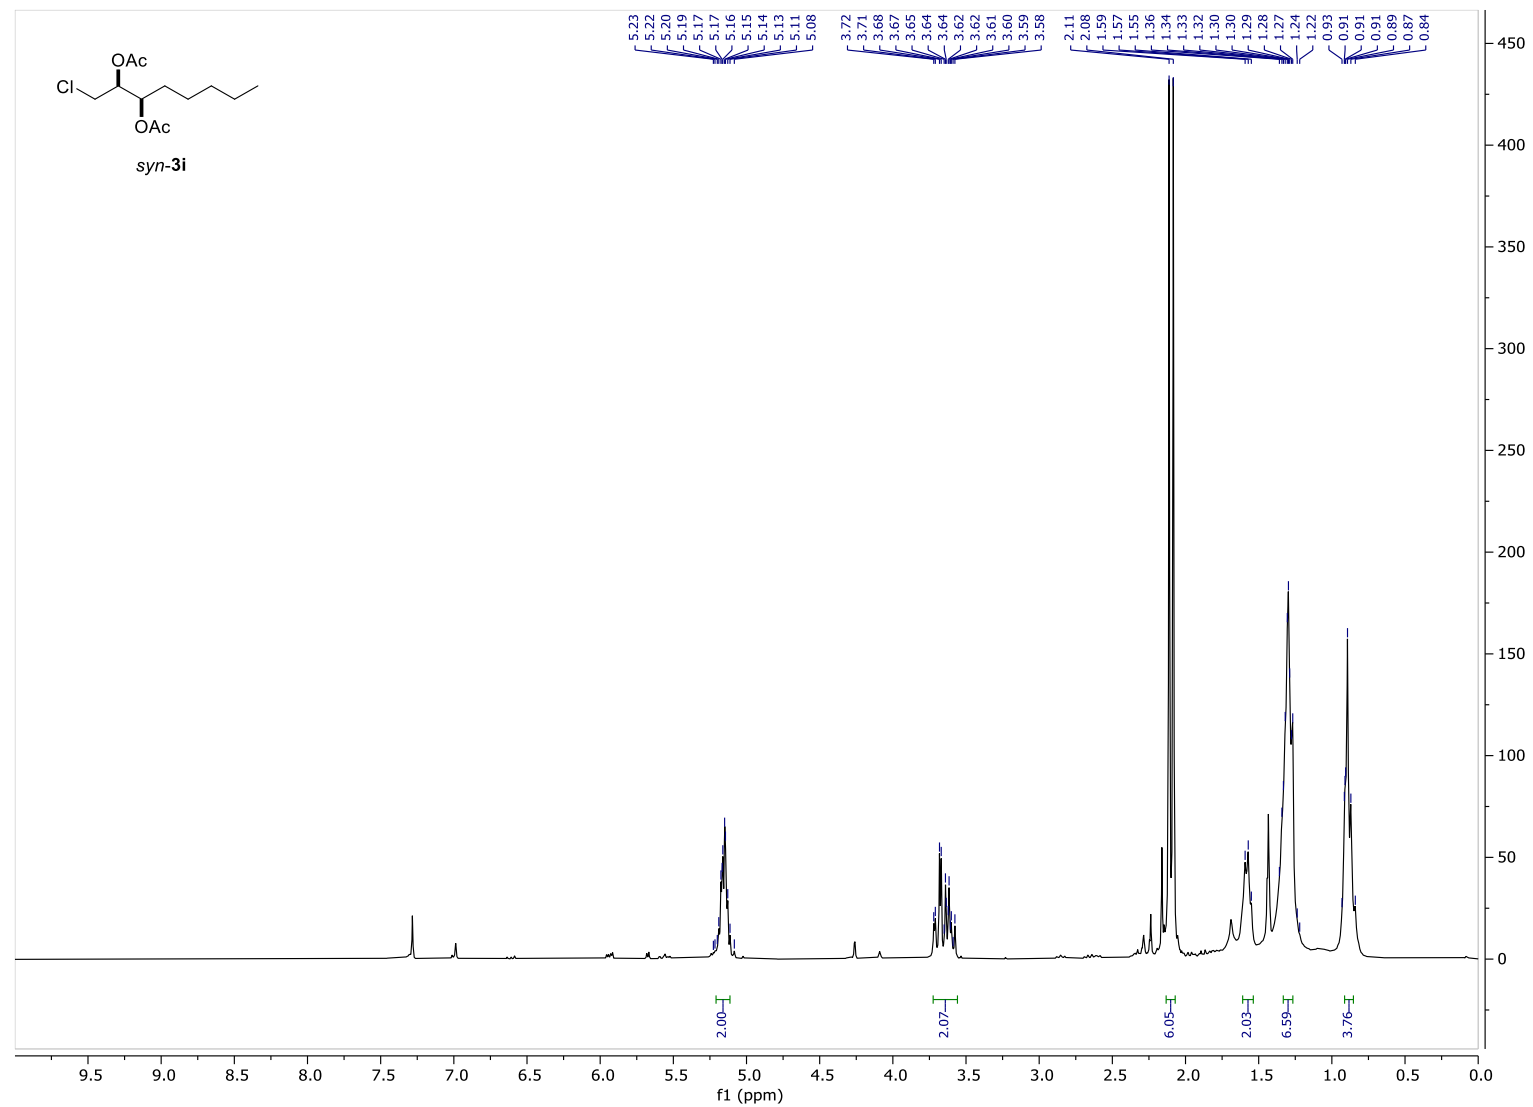

Figure S74.  $^1\text{H-NMR}$  spectrum ( $\text{CDCl}_3$ ) of compound *syn-3i*.

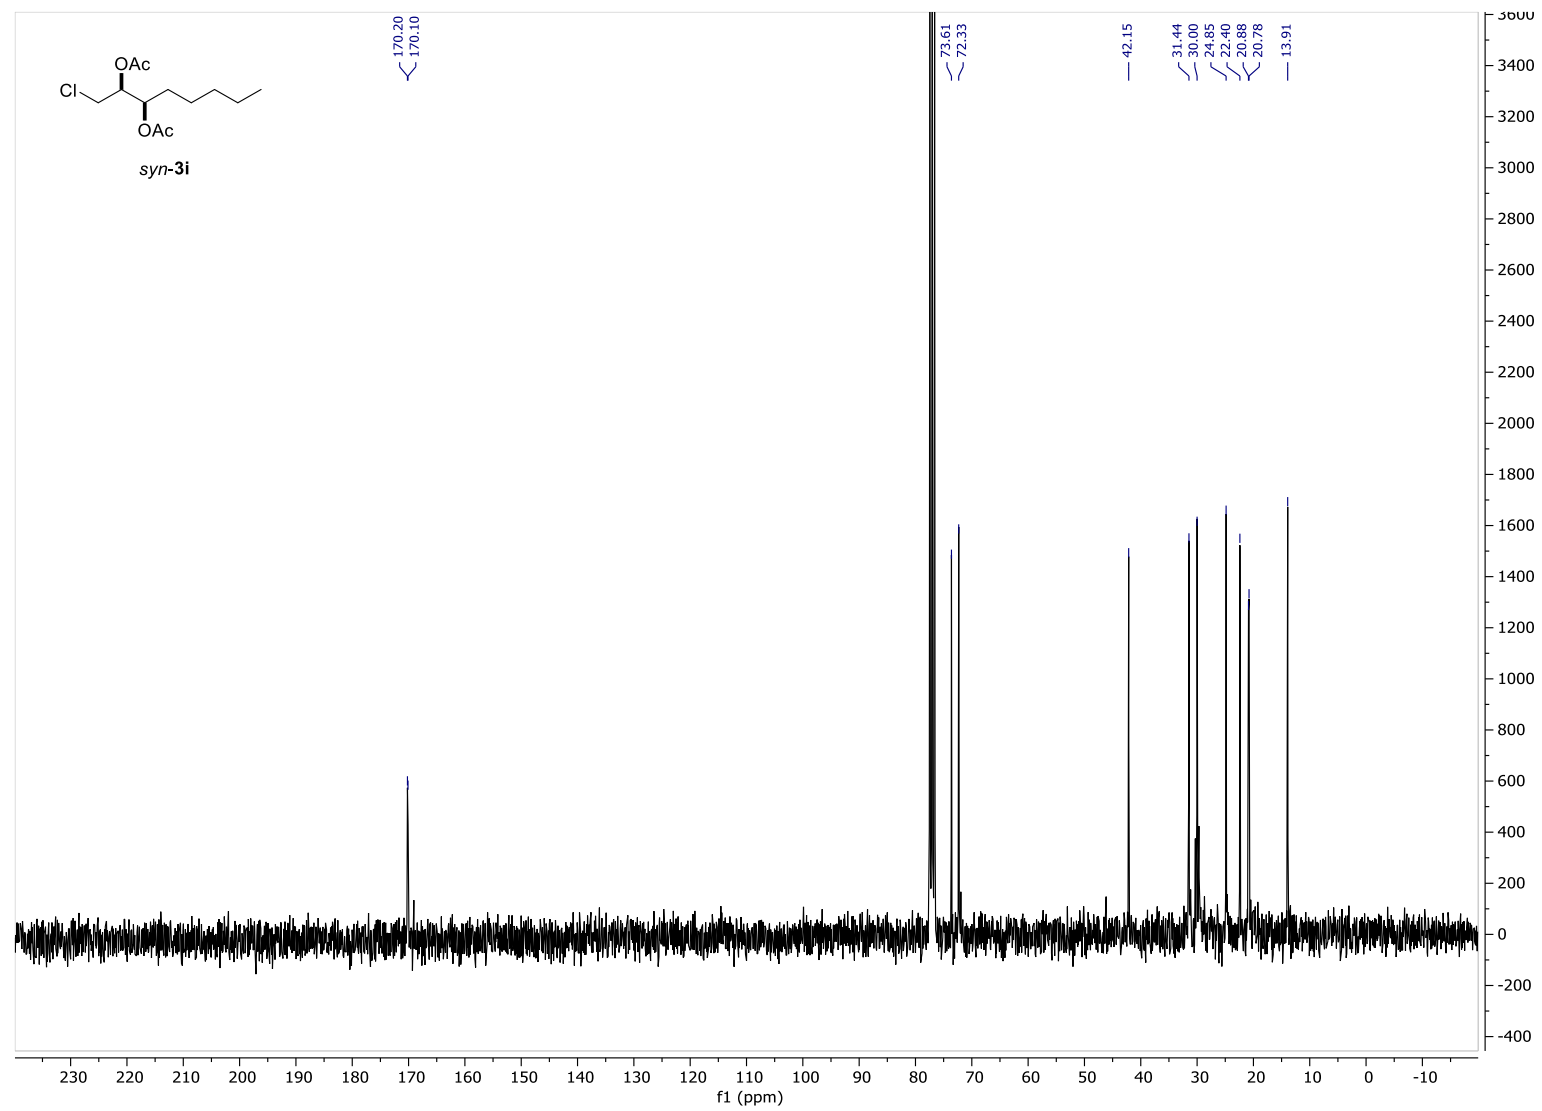

Figure S75.  $^{13}\text{C}$ -NMR spectrum ( $\text{CDCl}_3$ ) of compound *syn-3i*.

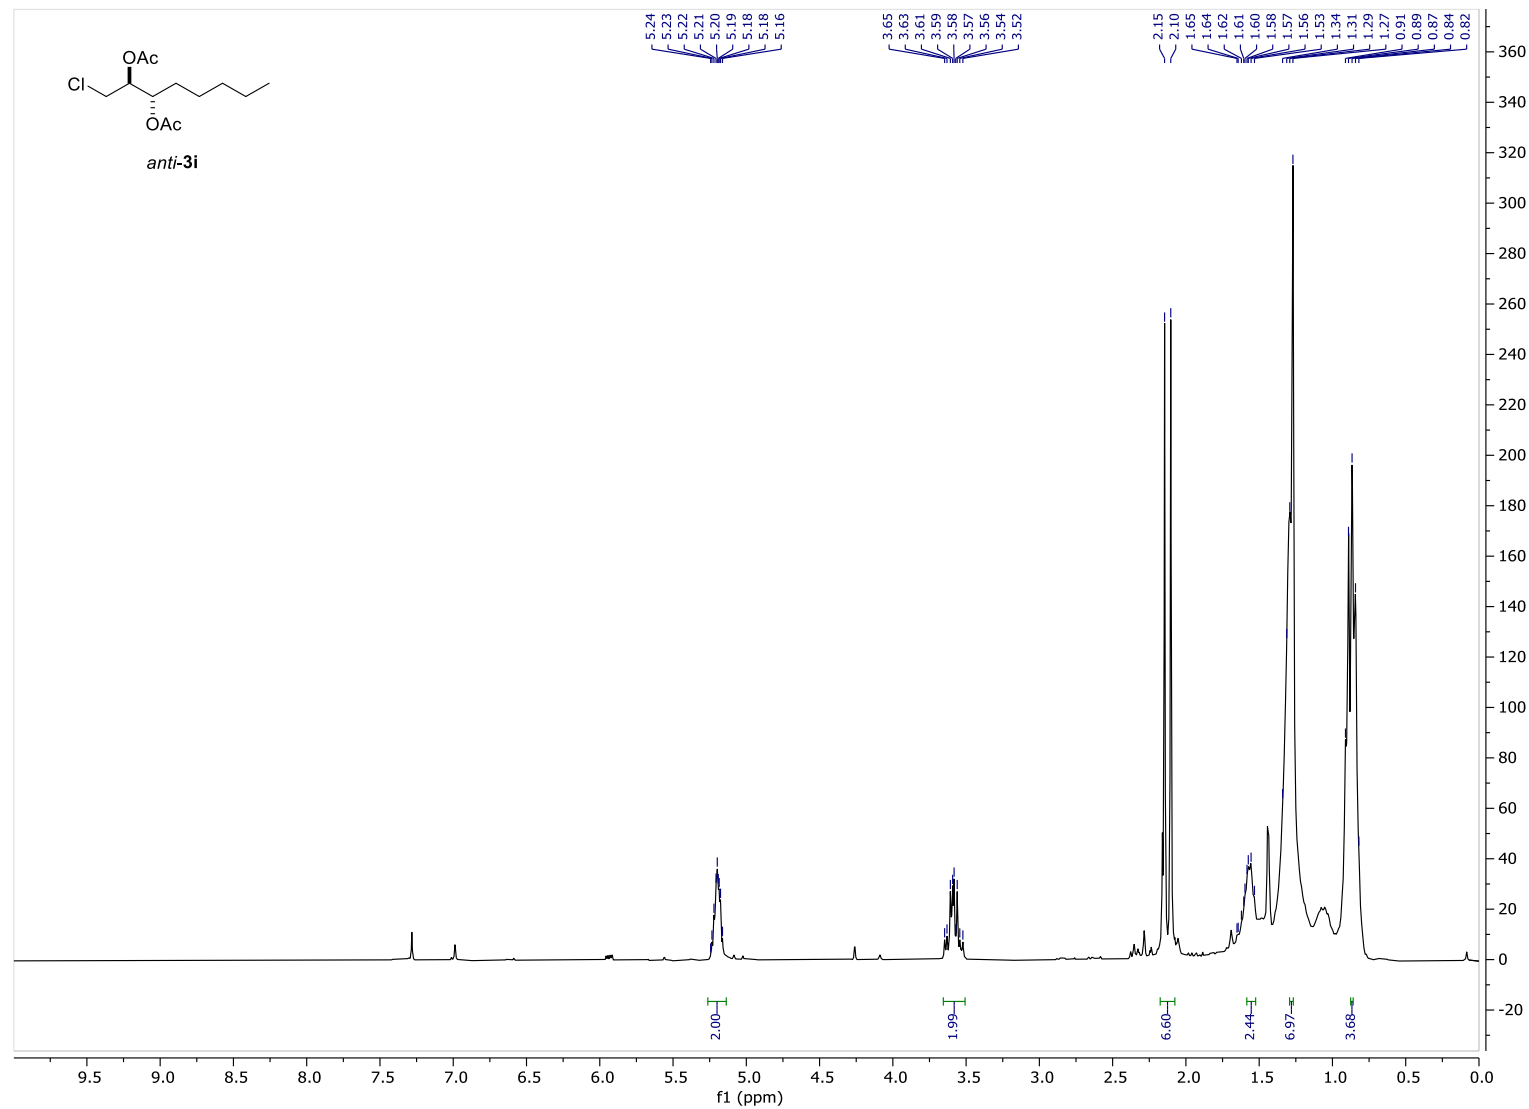

Figure S76. <sup>1</sup>H-NMR spectrum (CDCl<sub>3</sub>) of compound *anti-3i*.

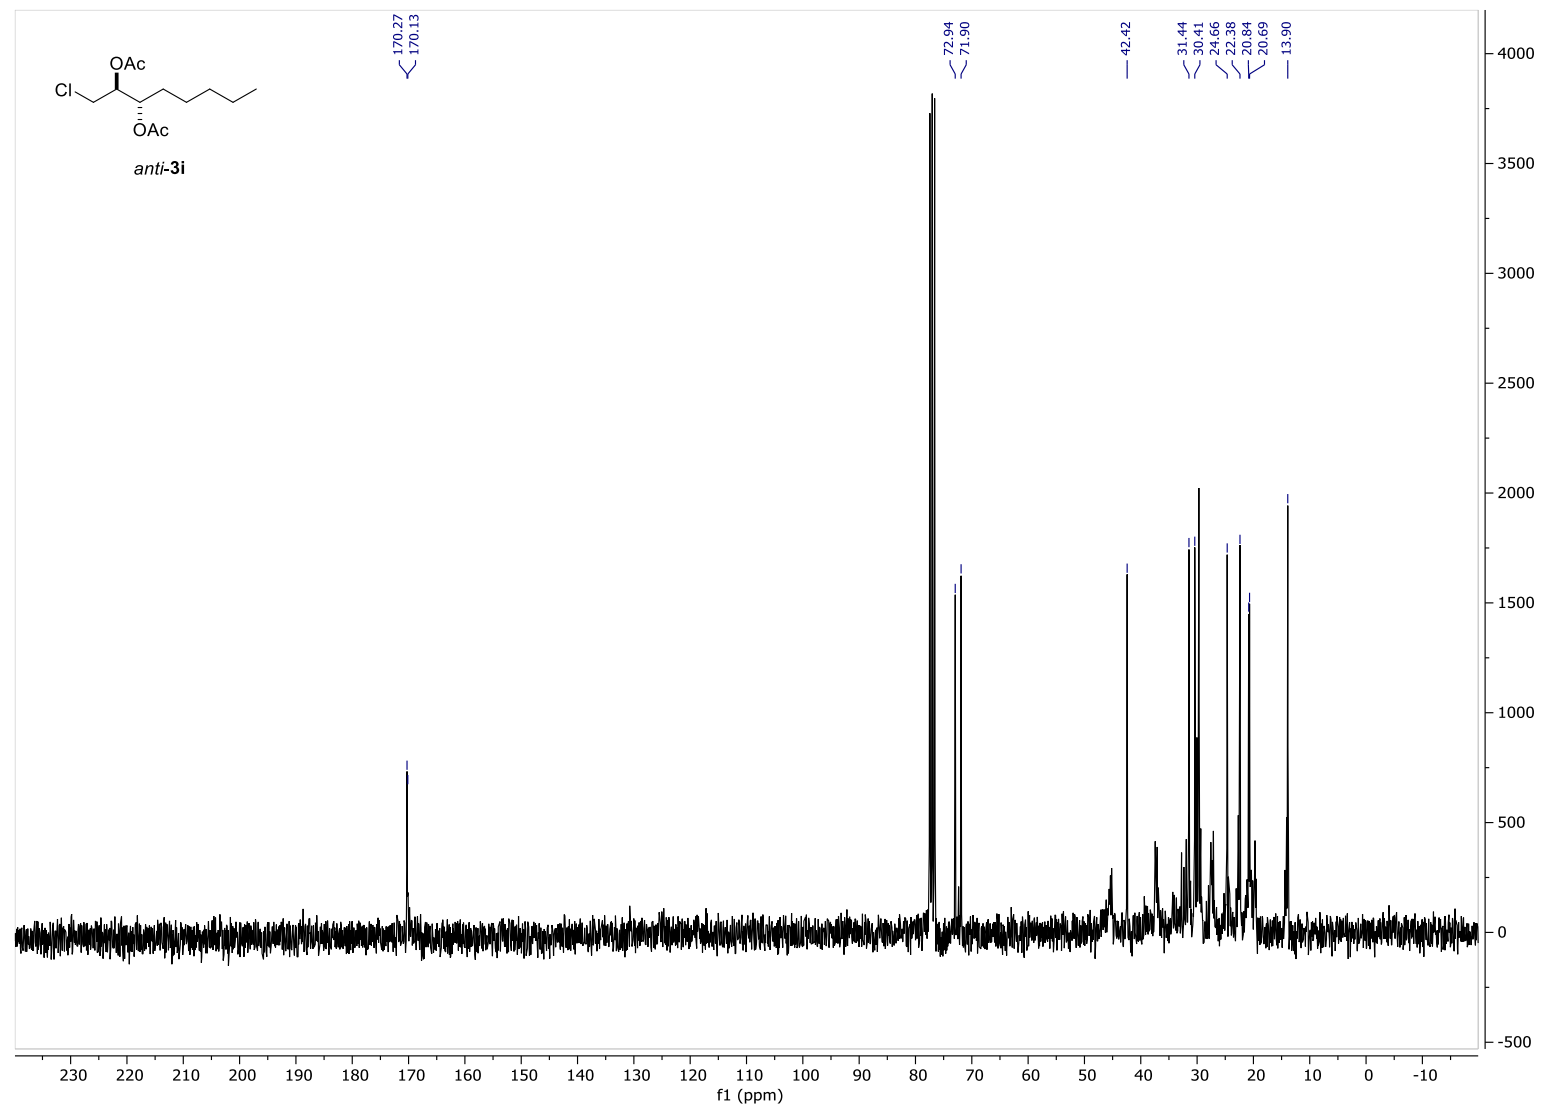

Figure S77.  $^1\text{H}$  and  $^{13}\text{C}$ -NMR spectrum ( $\text{CDCl}_3$ ) of compound *anti-3i*.

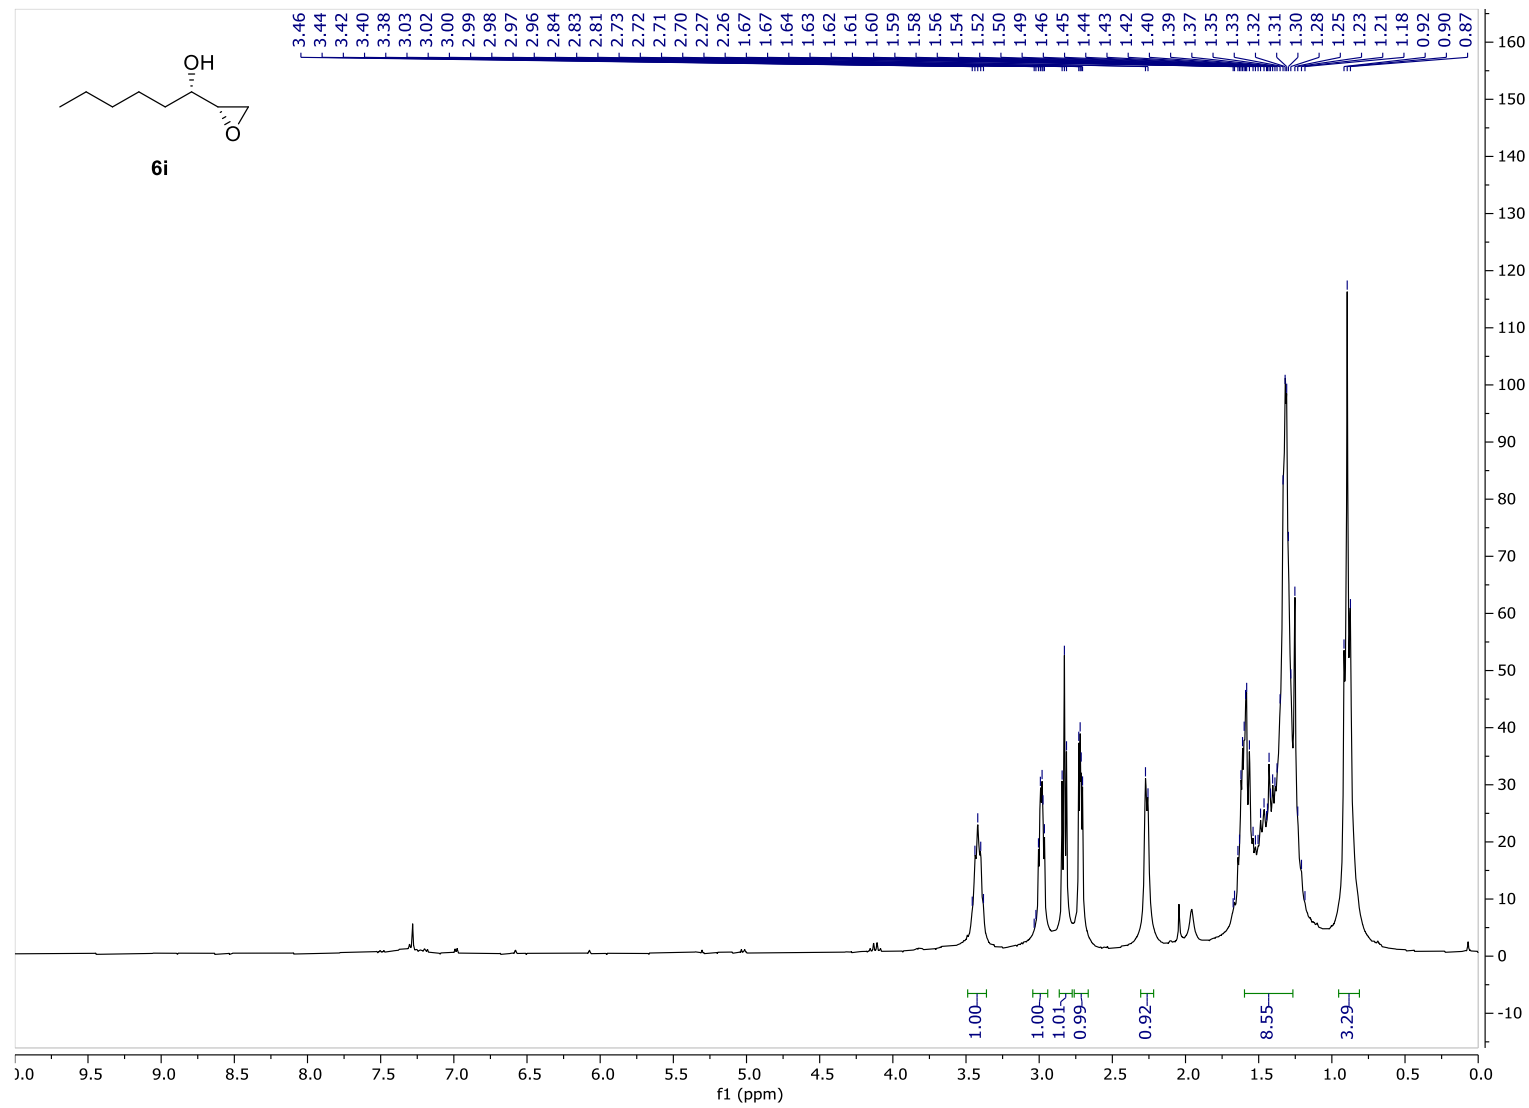

**Figure S78.**  $^1\text{H-NMR}$  spectrum ( $\text{CDCl}_3$ ) of compound **6i**.

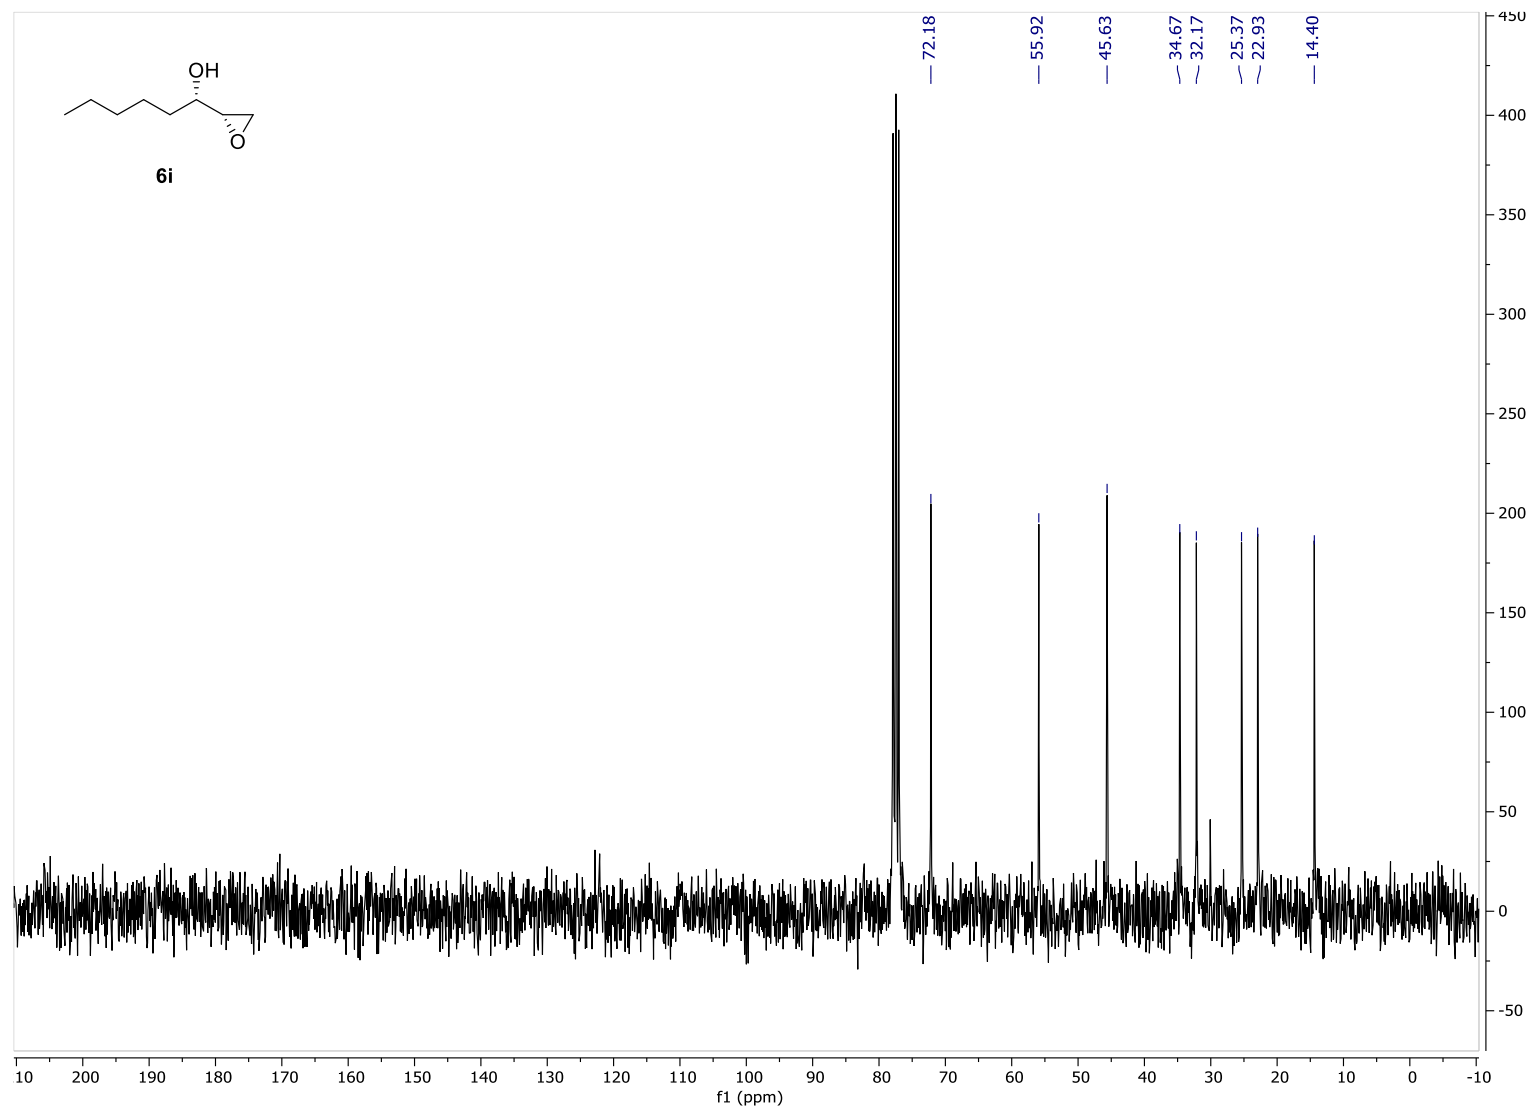

Figure S79.  $^{13}\text{C}$ -NMR spectrum (CDCl<sub>3</sub>) of compound **6i**.
